# Supplementary material for: Sex-specific transcriptomic responses to changes in the nutritional environment
Source: eLife. 2019 Aug 22;8:e47262. doi: 10.7554/eLife.47262 (PMC6773443; doi:10.7554/eLife.47262)
Supplement: Supplementary file 2. — In each tab, we show the genes that were significant in our analyses (FDR < 0.05) [file elife-47262-supp2.xlsx]

## Sheet: D
gene	S	D	SD	combo	FLYBASE	ENTREZID	SYMBOL	GENENAME
FBgn0265002	Y	Y	N	Y Y N	FBgn0265002	34341	CG44153	uncharacterized protein
FBgn0034135	Y	Y	N	Y Y N	FBgn0034135	36848	Syn2	Syntrophin-like 2
FBgn0034143	Y	Y	N	Y Y N	FBgn0034143	36858	CG8303	CG8303
FBgn0034145	Y	Y	N	Y Y N	FBgn0034145	36860	CG5065	CG5065
FBgn0024352	Y	Y	N	Y Y N	FBgn0024352	33202	Hop	Hsp70/Hsp90 organizing protein
FBgn0030594	Y	Y	N	Y Y N	FBgn0030594	32420	CG9509	CG9509
FBgn0029804	Y	Y	N	Y Y N	FBgn0029804	31503	CG3097	CG3097
FBgn0266918	Y	Y	N	Y Y N	FBgn0266918	38367	CG32486	uncharacterized protein
FBgn0034162	Y	Y	N	Y Y N	FBgn0034162	36891	CG6426	CG6426
FBgn0024366	Y	Y	N	Y Y N	FBgn0024366	31078	CG11409	uncharacterized protein
FBgn0029814	Y	Y	N	Y Y N	FBgn0029814	31513	CG15765	uncharacterized protein
FBgn0029823	Y	Y	N	Y Y N	FBgn0029823	31524	CG3011	CG3011
FBgn0029838	Y	Y	N	Y Y N	FBgn0029838	31541	CG4666	CG4666
FBgn0031116	Y	Y	N	Y Y N	FBgn0031116	33046	CG1695	CG1695
FBgn0029863	Y	Y	N	Y Y N	FBgn0029863	31573	CG3823	CG3823
FBgn0029866	Y	Y	N	Y Y N	FBgn0029866	31576	CG3842	CG3842
FBgn0031143	Y	Y	N	Y Y N	FBgn0031143	33076	CG1532	CG1532
FBgn0029868	Y	Y	N	Y Y N	FBgn0029868	31578	ND-B16.6	NADH dehydrogenase (ubiquinone) B16.6 subunit
FBgn0052633	Y	Y	N	Y Y N	FBgn0052633	326225	CG32633	uncharacterized protein
FBgn0039674	Y	Y	N	Y Y N	FBgn0039674	43483	CG1907	CG1907
FBgn0052656	Y	Y	N	Y Y N	FBgn0052656	32174	Muc11A	Mucin 11A
FBgn0083945	Y	Y	N	Y Y N	FBgn0083945	4379890	CG34109	uncharacterized protein
FBgn0036623	Y	Y	N	Y Y N	FBgn0036623	39820	CG4729	CG4729
FBgn0083950	Y	Y	N	Y Y N	FBgn0083950	4379854	CG34114	uncharacterized protein
FBgn0083962	Y	Y	N	Y Y N	FBgn0083962	318872	CG34126	uncharacterized protein
FBgn0052687	Y	Y	N	Y Y N	FBgn0052687	31980	CG32687	uncharacterized protein
FBgn0052694	Y	Y	N	Y Y N	FBgn0052694	31933	CG32694	uncharacterized protein
FBgn0263980	Y	Y	N	Y Y N	FBgn0263980	5740318	CG43729	uncharacterized protein
FBgn0026878	Y	Y	N	Y Y N	FBgn0026878	31167	CG4325	CG4325
FBgn0053203	Y	Y	N	Y Y N	FBgn0053203	43414	CG33203	uncharacterized protein
FBgn0033603	Y	Y	N	Y Y N	FBgn0033603	36194	Cpr47Ef	Cuticular protein 47Ef
FBgn0263995	Y	Y	N	Y Y N	FBgn0263995	45840	cpo	couch potato
FBgn0053258	Y	Y	N	Y Y N	FBgn0053258	3885664	CG33258	uncharacterized protein
FBgn0037230	Y	Y	N	Y Y N	FBgn0037230	40540	CG9780	CG9780
FBgn0037238	Y	Y	N	Y Y N	FBgn0037238	40551	CG1090	CG1090
FBgn0037239	Y	Y	N	Y Y N	FBgn0037239	40552	CG11739	uncharacterized protein
FBgn0030600	Y	Y	N	Y Y N	FBgn0030600	32429	hiw	highwire
FBgn0030607	Y	Y	N	Y Y N	FBgn0030607	32436	dob	doppelganger von brummer
FBgn0053282	Y	Y	N	Y Y N	FBgn0053282	2768939	CG33282	uncharacterized protein
FBgn0030612	Y	Y	N	Y Y N	FBgn0030612	32441	CG5599	CG5599
FBgn0261509	Y	Y	N	Y Y N	FBgn0261509	33339	haf	hattifattener
FBgn0027491	Y	Y	N	Y Y N	FBgn0027491	34385	Cdk5alpha	Cdk5 activator-like protein
FBgn0050281	Y	Y	N	Y Y N	FBgn0050281	246525	CG30281	uncharacterized protein
FBgn0050296	Y	Y	N	Y Y N	FBgn0050296	37384	RIC-3	RIC3 acetylcholine receptor chaperone
FBgn0034275	Y	Y	N	Y Y N	FBgn0034275	37025	CG5002	CG5002
FBgn0034276	Y	Y	N	Y Y N	FBgn0034276	37026	Sardh	Sarcosine dehydrogenase
FBgn0029932	Y	Y	N	Y Y N	FBgn0029932	31653	CG4607	CG4607
FBgn0004888	Y	Y	N	Y Y N	FBgn0004888	38447	Scsalpha	Succinyl coenzyme A synthetase alpha subunit
FBgn0034290	Y	Y	N	Y Y N	FBgn0034290	37053	CG5773	CG5773
FBgn0029948	Y	Y	N	Y Y N	FBgn0029948	31672	CheA7a	Chemosensory protein A 7a
FBgn0039754	Y	Y	N	Y Y N	FBgn0039754	43591	CG9747	CG9747
FBgn0039755	Y	Y	N	Y Y N	FBgn0039755	43592	CG15531	uncharacterized protein
FBgn0039761	Y	Y	N	Y Y N	FBgn0039761	43603	CG18404	uncharacterized protein
FBgn0039768	Y	Y	N	Y Y N	FBgn0039768	43612	CG15533	uncharacterized protein
FBgn0029969	Y	Y	N	Y Y N	FBgn0029969	31695	CG10932	uncharacterized protein
FBgn0029975	Y	Y	N	Y Y N	FBgn0029975	31703	spidey	spidey
FBgn0039778	Y	Y	N	Y Y N	FBgn0039778	43622	Jon99Fi	Jonah 99Fi
FBgn0039787	Y	Y	N	Y Y N	FBgn0039787	43634	CG9702	CG9702
FBgn0031264	Y	Y	N	Y Y N	FBgn0031264	33232	CG11835	uncharacterized protein
FBgn0052750	Y	Y	N	Y Y N	FBgn0052750	326238	CG32750	uncharacterized protein
FBgn0036715	Y	Y	N	Y Y N	FBgn0036715	39936	Cad74A	Cadherin 74A
FBgn0031277	Y	Y	N	Y Y N	FBgn0031277	33250	CG13947	uncharacterized protein
FBgn0031294	Y	Y	N	Y Y N	FBgn0031294	33277	IA-2	IA-2 protein tyrosine phosphatase
FBgn0011695	Y	Y	N	Y Y N	FBgn0011695	49821	EbpIII	Ejaculatory bulb protein III
FBgn0053301	Y	Y	N	Y Y N	FBgn0053301	2768917	CG33301	uncharacterized protein
FBgn0053303	Y	Y	N	Y Y N	FBgn0053303	2768916	CG33303	uncharacterized protein
FBgn0036787	Y	Y	N	Y Y N	FBgn0036787	40017	CG4306	CG4306
FBgn0036795	Y	Y	N	Y Y N	FBgn0036795	40025	CG18233	uncharacterized protein
FBgn0036796	Y	Y	N	Y Y N	FBgn0036796	40026	CG18231	uncharacterized protein
FBgn0043535	Y	Y	N	Y Y N	FBgn0043535	246670	Obp57a	Odorant-binding protein 57a
FBgn0264606	Y	Y	N	Y Y N	FBgn0264606	38337	Fife	fife
FBgn0033774	Y	Y	N	Y Y N	FBgn0033774	36410	CG12374	uncharacterized protein
FBgn0043578	Y	Y	N	Y Y N	FBgn0043578	39870	PGRP-SB1	PGRP-SB1
FBgn0040503	Y	Y	N	Y Y N	FBgn0040503	36235	CG7763	CG7763
FBgn0030706	Y	Y	N	Y Y N	FBgn0030706	32552	CG8909	CG8909
FBgn0030724	Y	Y	N	Y Y N	FBgn0030724	32573	Nipsnap	nipsnap
FBgn0040532	Y	Y	N	Y Y N	FBgn0040532	50005	CG8369	CG8369
FBgn0030739	Y	Y	N	Y Y N	FBgn0030739	32594	SWIP	Strumpellin and WASH-interacting protein
FBgn0030747	Y	Y	N	Y Y N	FBgn0030747	32610	CG4301	CG4301
FBgn0037386	Y	Y	N	Y Y N	FBgn0037386	40727	CG1208	CG1208
FBgn0027585	Y	Y	N	Y Y N	FBgn0027585	35866	CG8740	CG8740
FBgn0027586	Y	Y	N	Y Y N	FBgn0027586	34728	CG5867	CG5867
FBgn0264695	Y	Y	N	Y Y N	FBgn0264695	35007	Mhc	Myosin heavy chain
FBgn0261625	Y	Y	N	Y Y N	FBgn0261625	36396	GLS	Glutaminase
FBgn0037391	Y	Y	N	Y Y N	FBgn0037391	40733	CG2017	CG2017
FBgn0027590	Y	Y	N	Y Y N	FBgn0027590	37960	GstE12	Glutathione S transferase E12
FBgn0050360	Y	Y	N	Y Y N	FBgn0050360	246565	Mal-A6	Maltase A6
FBgn0030773	Y	Y	N	Y Y N	FBgn0030773	32647	CG9676	CG9676
FBgn0085227	Y	Y	N	Y Y N	FBgn0085227	5740481	CG34198	uncharacterized protein
FBgn0030777	Y	Y	N	Y Y N	FBgn0030777	32651	CG9672	CG9672
FBgn0039800	Y	Y	N	Y Y N	FBgn0039800	43648	Npc2g	Niemann-Pick type C-2g
FBgn0039801	Y	Y	N	Y Y N	FBgn0039801	43649	Npc2h	Niemann-Pick type C-2h
FBgn0003074	Y	Y	N	Y Y N	FBgn0003074	35886	Pgi	Phosphoglucose isomerase
FBgn0003076	Y	Y	N	Y Y N	FBgn0003076	44010	Pgm	phosphoglucose mutase
FBgn0261673	Y	Y	N	Y Y N	FBgn0261673	36395	nemy	no extended memory
FBgn0039827	Y	Y	N	Y Y N	FBgn0039827	43689	CG1544	CG1544
FBgn0034387	Y	Y	N	Y Y N	FBgn0034387	37163	Cyp12b2	Cyp12b2
FBgn0000024	Y	Y	N	Y Y N	FBgn0000024	41625	Ace	Acetylcholine esterase
FBgn0265262	Y	Y	N	Y Y N	FBgn0265262	45668	Vha68-1	Vacuolar H[+] ATPase 68kD subunit 1
FBgn0000036	Y	Y	N	Y Y N	FBgn0000036	42918	nAChRalpha1	nicotinic Acetylcholine Receptor alpha1
FBgn0000038	Y	Y	N	Y Y N	FBgn0000038	38545	nAChRbeta1	nicotinic Acetylcholine Receptor beta1
FBgn0011722	Y	Y	N	Y Y N	FBgn0011722	33896	Tig	Tiggrin
FBgn0000044	Y	Y	N	Y Y N	FBgn0000044	37368	Act57B	Actin 57B
FBgn0000045	Y	Y	N	Y Y N	FBgn0000045	40444	Act79B	Actin 79B
FBgn0000046	Y	Y	N	Y Y N	FBgn0000046	48632	Act87E	Actin 87E
FBgn0000047	Y	Y	N	Y Y N	FBgn0000047	41885	Act88F	Actin 88F
FBgn0000052	Y	Y	N	Y Y N	FBgn0000052	33847	ade2	adenosine 2
FBgn0000053	Y	Y	N	Y Y N	FBgn0000053	33986	ade3	adenosine 3
FBgn0011740	Y	Y	N	Y Y N	FBgn0011740	41126	alpha-Man-IIa	alpha-Mannosidase class II a
FBgn0039872	Y	Y	N	Y Y N	FBgn0039872	43742	salt	salty dog
FBgn0265296	Y	Y	N	Y Y N	FBgn0265296	38788	Dscam2	Down syndrome cell adhesion molecule 2
FBgn0039877	Y	Y	N	Y Y N	FBgn0039877	43750	CG2118	CG2118
FBgn0000079	Y	Y	N	Y Y N	FBgn0000079	47764	Amy-p	Amylase proximal
FBgn0039897	Y	Y	N	Y Y N	FBgn0039897	43780	CG1674	CG1674
FBgn0011770	Y	Y	N	Y Y N	FBgn0011770	31960	Gip	GIP-like
FBgn0036821	Y	Y	N	Y Y N	FBgn0036821	40056	CG3961	CG3961
FBgn0036824	Y	Y	N	Y Y N	FBgn0036824	40059	CG3902	CG3902
FBgn0041181	Y	Y	N	Y Y N	FBgn0041181	34045	Tep3	Thioester-containing protein 3
FBgn0036837	Y	Y	N	Y Y N	FBgn0036837	40073	CG18135	uncharacterized protein
FBgn0041194	Y	Y	N	Y Y N	FBgn0041194	38753	Prat2	Phosphoribosylamidotransferase 2
FBgn0036857	Y	Y	N	Y Y N	FBgn0036857	40097	CG9629	CG9629
FBgn0005586	Y	Y	N	Y Y N	FBgn0005586	36127	Rab3	Rab3
FBgn0033807	Y	Y	N	Y Y N	FBgn0033807	36456	AQP	aquaporin
FBgn0270926	Y	Y	N	Y Y N	FBgn0270926	2768965	AsnS	Asparagine synthetase
FBgn0033821	Y	Y	N	Y Y N	FBgn0033821	36472	CG10799	uncharacterized protein
FBgn0027608	Y	Y	N	Y Y N	FBgn0027608	40713	CG2082	CG2082
FBgn0002571	Y	Y	N	Y Y N	FBgn0002571	35826	Mal-A3	Maltase A3
FBgn0037433	Y	Y	N	Y Y N	FBgn0037433	40780	CG17919	uncharacterized protein
FBgn0033876	Y	Y	N	Y Y N	FBgn0033876	36533	Syngr	Synaptogyrin
FBgn0264745	Y	Y	N	Y Y N	FBgn0264745	14462682	CR44003	pseudo
FBgn0033879	Y	Y	N	Y Y N	FBgn0033879	36536	CG6543	CG6543
FBgn0040606	Y	Y	N	Y Y N	FBgn0040606	50079	CG6503	CG6503
FBgn0053481	Y	Y	N	Y Y N	FBgn0053481	2768865	dpr7	defective proboscis extension response 7
FBgn0264750	Y	Y	N	Y Y N	FBgn0264750	14462750	CG44008	uncharacterized protein
FBgn0027654	Y	Y	N	Y Y N	FBgn0027654	43630	jdp	jdp
FBgn0027657	Y	Y	N	Y Y N	FBgn0027657	41930	glob1	globin 1
FBgn0050431	Y	Y	N	Y Y N	FBgn0050431	35549	CG30431	uncharacterized protein
FBgn0034406	Y	Y	N	Y Y N	FBgn0034406	37182	Jheh3	Juvenile hormone epoxide hydrolase 3
FBgn0030855	Y	Y	N	Y Y N	FBgn0030855	32742	CG5800	CG5800
FBgn0034420	Y	Y	N	Y Y N	FBgn0034420	37202	CG10737	uncharacterized protein
FBgn0003149	Y	Y	N	Y Y N	FBgn0003149	39002	Prm	Paramyosin
FBgn0030872	Y	Y	N	Y Y N	FBgn0030872	32764	Ucp4A	Ucp4A
FBgn0034439	Y	Y	N	Y Y N	FBgn0034439	37224	CG10062	uncharacterized protein
FBgn0030887	Y	Y	N	Y Y N	FBgn0030887	32782	CG6867	CG6867
FBgn0014859	Y	Y	N	Y Y N	FBgn0014859	35332	Hr38	Hormone receptor-like in 38
FBgn0030897	Y	Y	N	Y Y N	FBgn0030897	32797	Frq1	Frequenin 1
FBgn0014863	Y	Y	N	Y Y N	FBgn0014863	40849	Mlp84B	Muscle LIM protein at 84B
FBgn0039911	Y	Y	N	Y Y N	FBgn0039911	43800	CG1909	CG1909
FBgn0085353	Y	Y	N	Y Y N	FBgn0085353	32302	CG34324	uncharacterized protein
FBgn0039916	Y	Y	N	Y Y N	FBgn0039916	43806	Ekar	Eye-enriched kainate receptor
FBgn0085358	Y	Y	N	Y Y N	FBgn0085358	50358	Diedel3	Diedel 3
FBgn0000108	Y	Y	N	Y Y N	FBgn0000108	31002	Appl	beta amyloid protein precursor-like
FBgn0034470	Y	Y	N	Y Y N	FBgn0034470	37266	Obp56d	Odorant-binding protein 56d
FBgn0038038	Y	Y	N	Y Y N	FBgn0038038	41521	CG5167	CG5167
FBgn0034474	Y	Y	N	Y Y N	FBgn0034474	37270	Obp56g	Odorant-binding protein 56g
FBgn0034479	Y	Y	N	Y Y N	FBgn0034479	37275	CG8654	CG8654
FBgn0000116	Y	Y	N	Y Y N	FBgn0000116	39041	Argk	Arginine kinase
FBgn0261788	Y	Y	N	Y Y N	FBgn0261788	38863	Ank2	Ankyrin 2
FBgn0000120	Y	Y	N	Y Y N	FBgn0000120	35078	Arr1	Arrestin 1
FBgn0000121	Y	Y	N	Y Y N	FBgn0000121	38993	Arr2	Arrestin 2
FBgn0265356	Y	Y	N	Y Y N	FBgn0265356	37190	tn	thin
FBgn0261794	Y	Y	N	Y Y N	FBgn0261794	37800	kcc	kazachoc
FBgn0031414	Y	Y	N	Y Y N	FBgn0031414	3771890	eys	eyes shut
FBgn0031417	Y	Y	N	Y Y N	FBgn0031417	33420	CG3597	CG3597
FBgn0034490	Y	Y	N	Y Y N	FBgn0034490	37287	CG9864	CG9864
FBgn0085386	Y	Y	N	Y Y N	FBgn0085386	5740349	CG34357	uncharacterized protein
FBgn0031424	Y	Y	N	Y Y N	FBgn0031424	33427	VGlut	Vesicular glutamate transporter
FBgn0031428	Y	Y	N	Y Y N	FBgn0031428	33431	CG9886	CG9886
FBgn0051030	Y	Y	N	Y Y N	FBgn0051030	318563	CG31030	uncharacterized protein
FBgn0038074	Y	Y	N	Y Y N	FBgn0038074	41561	Gnmt	Glycine N-methyltransferase
FBgn0038082	Y	Y	N	Y Y N	FBgn0038082	41573	CG5724	CG5724
FBgn0038083	Y	Y	N	Y Y N	FBgn0038083	41574	CG5999	CG5999
FBgn0035039	Y	Y	N	Y Y N	FBgn0035039	37938	Adck	aarF domain containing kinase
FBgn0035040	Y	Y	N	Y Y N	FBgn0035040	37939	CG4741	CG4741
FBgn0031489	Y	Y	N	Y Y N	FBgn0031489	33510	CG17224	uncharacterized protein
FBgn0051091	Y	Y	N	Y Y N	FBgn0051091	318591	CG31091	uncharacterized protein
FBgn0005666	Y	Y	N	Y Y N	FBgn0005666	43814	bt	bent
FBgn0267828	Y	Y	N	Y Y N	FBgn0267828	26067068	Fatp	Fatty acid (long chain) transport protein
FBgn0035087	Y	Y	N	Y Y N	FBgn0035087	37994	CG2765	CG2765
FBgn0035091	Y	Y	N	Y Y N	FBgn0035091	38000	CG3829	CG3829
FBgn0035092	Y	Y	N	Y Y N	FBgn0035092	38003	Nplp1	Neuropeptide-like precursor 1
FBgn0032021	Y	Y	N	Y Y N	FBgn0032021	34143	CG7781	CG7781
FBgn0033919	Y	Y	N	Y Y N	FBgn0033919	36586	CG8547	CG8547
FBgn0036992	Y	Y	N	Y Y N	FBgn0036992	40263	CG11796	uncharacterized protein
FBgn0036995	Y	Y	N	Y Y N	FBgn0036995	40266	atk	artichoke
FBgn0036996	Y	Y	N	Y Y N	FBgn0036996	40267	mag	magro
FBgn0036997	Y	Y	N	Y Y N	FBgn0036997	40268	CG5955	CG5955
FBgn0033926	Y	Y	N	Y Y N	FBgn0033926	36595	Arc1	Activity-regulated cytoskeleton associated protein 1
FBgn0033936	Y	Y	N	Y Y N	FBgn0033936	36605	CG17386	uncharacterized protein
FBgn0053547	Y	Y	N	Y Y N	FBgn0053547	42150	Rim	Rab3 interacting molecule
FBgn0032068	Y	Y	N	Y Y N	FBgn0032068	34205	LManV	Lysosomal alpha-mannosidase V
FBgn0032069	Y	Y	N	Y Y N	FBgn0032069	34206	LManVI	Lysosomal alpha-mannosidase VI
FBgn0016031	Y	Y	N	Y Y N	FBgn0016031	38610	lama	lamina ancestor
FBgn0032075	Y	Y	N	Y Y N	FBgn0032075	34212	Tsp29Fb	Tetraspanin 29Fb
FBgn0032087	Y	Y	N	Y Y N	FBgn0032087	34227	CG9568	CG9568
FBgn0037534	Y	Y	N	Y Y N	FBgn0037534	40943	CG2781	CG2781
FBgn0033978	Y	Y	N	Y Y N	FBgn0033978	36661	Cyp6a23	Cyp6a23
FBgn0050502	Y	Y	N	Y Y N	FBgn0050502	35670	fa2h	fatty acid 2-hydroylase
FBgn0037547	Y	Y	N	Y Y N	FBgn0037547	40956	CG7910	CG7910
FBgn0016061	Y	Y	N	Y Y N	FBgn0016061	43300	side	sidestep
FBgn0043791	Y	Y	N	Y Y N	FBgn0043791	41135	phu	phurba tashi
FBgn0033999	Y	Y	N	Y Y N	FBgn0033999	36686	CG8093	CG8093
FBgn0037563	Y	Y	N	Y Y N	FBgn0037563	40977	CG11672	uncharacterized protein
FBgn0040735	Y	Y	N	Y Y N	FBgn0040735	50208	CG16836	uncharacterized protein
FBgn0264894	Y	Y	N	Y Y N	FBgn0264894	34732	CG44085	uncharacterized protein
FBgn0085414	Y	Y	N	Y Y N	FBgn0085414	50320	dpr12	defective proboscis extension response 12
FBgn0030966	Y	Y	N	Y Y N	FBgn0030966	32878	CG7280	CG7280
FBgn0030968	Y	Y	N	Y Y N	FBgn0030968	32880	CG7322	CG7322
FBgn0085427	Y	Y	N	Y Y N	FBgn0085427	5740462	CG34398	uncharacterized protein
FBgn0024740	Y	Y	N	Y Y N	FBgn0024740	43980	Lip2	Lipase 2
FBgn0038115	Y	Y	N	Y Y N	FBgn0038115	41610	CG7966	CG7966
FBgn0034553	Y	Y	N	Y Y N	FBgn0034553	37358	CG9993	CG9993
FBgn0030993	Y	Y	N	Y Y N	FBgn0030993	32905	Mec2	Mec2
FBgn0030999	Y	Y	N	Y Y N	FBgn0030999	32912	Mur18B	Mucin related 18B
FBgn0085453	Y	Y	N	Y Y N	FBgn0085453	37699	CG34424	uncharacterized protein
FBgn0000206	Y	Y	N	Y Y N	FBgn0000206	43146	boss	bride of sevenless
FBgn0038130	Y	Y	N	Y Y N	FBgn0038130	41629	CG8630	CG8630
FBgn0038136	Y	Y	N	Y Y N	FBgn0038136	41635	CG8774	CG8774
FBgn0259209	Y	Y	N	Y Y N	FBgn0259209	37853	Mlp60A	Muscle LIM protein at 60A
FBgn0010015	Y	Y	N	Y Y N	FBgn0010015	43670	CanA1	Calcineurin A1
FBgn0010019	Y	Y	N	Y Y N	FBgn0010019	30986	Cyp4g1	Cytochrome P450-4g1
FBgn0038143	Y	Y	N	Y Y N	FBgn0038143	41644	CG9813	CG9813
FBgn0259219	Y	Y	N	Y Y N	FBgn0259219	36473	CG42319	uncharacterized protein
FBgn0259222	Y	Y	N	Y Y N	FBgn0259222	42455	CG42322	uncharacterized protein
FBgn0259236	Y	Y	N	Y Y N	FBgn0259236	39696	comm3	comm3
FBgn0000244	Y	Y	N	Y Y N	FBgn0000244	41144	by	blistery
FBgn0038172	Y	Y	N	Y Y N	FBgn0038172	41679	Adgf-D	Adenosine deaminase-related growth factor D
FBgn0051140	Y	Y	N	Y Y N	FBgn0051140	42836	CG31140	uncharacterized protein
FBgn0265487	Y	Y	N	Y Y N	FBgn0265487	36945	mbl	muscleblind
FBgn0035103	Y	Y	N	Y Y N	FBgn0035103	38023	Vdup1	Vitamin D[[3]] up-regulated protein 1
FBgn0028396	Y	Y	N	Y Y N	FBgn0028396	44121	TotA	Turandot A
FBgn0038198	Y	Y	N	Y Y N	FBgn0038198	41710	Npc2b	Niemann-Pick type C-2b
FBgn0031561	Y	Y	N	Y Y N	FBgn0031561	33592	IM33	Immune induced molecule 33
FBgn0000287	Y	Y	N	Y Y N	FBgn0000287	34568	salr	spalt-related
FBgn0035147	Y	Y	N	Y Y N	FBgn0035147	38076	Gale	UDP-galactose 4'-epimerase
FBgn0051198	Y	Y	N	Y Y N	FBgn0051198	318622	CG31198	uncharacterized protein
FBgn0035176	Y	Y	N	Y Y N	FBgn0035176	38107	CG13905	uncharacterized protein
FBgn0015577	Y	Y	N	Y Y N	FBgn0015577	40897	alpha-Est9	alpha-Esterase-9
FBgn0035189	Y	Y	N	Y Y N	FBgn0035189	38124	CG9119	CG9119
FBgn0002719	Y	Y	N	Y Y N	FBgn0002719	47173	Men	Malic enzyme
FBgn0032129	Y	Y	N	Y Y N	FBgn0032129	34274	jp	junctophilin
FBgn0263006	Y	Y	N	Y Y N	FBgn0263006	49297	SERCA	Sarco/endoplasmic reticulum Ca(2+)-ATPase
FBgn0032156	Y	Y	N	Y Y N	FBgn0032156	34310	CG13124	uncharacterized protein
FBgn0022359	Y	Y	N	Y Y N	FBgn0022359	41313	Sodh-2	Sorbitol dehydrogenase-2
FBgn0037607	Y	Y	N	Y Y N	FBgn0037607	41027	CG8036	CG8036
FBgn0016122	Y	Y	N	Y Y N	FBgn0016122	34189	Acer	Angiotensin-converting enzyme-related
FBgn0053653	Y	Y	N	Y Y N	FBgn0053653	49968	Cadps	Calcium-dependent secretion activator
FBgn0002772	Y	Y	N	Y Y N	FBgn0002772	43323	Mlc1	Myosin alkali light chain 1
FBgn0002773	Y	Y	N	Y Y N	FBgn0002773	43587	Mlc2	Myosin light chain 2
FBgn0002789	Y	Y	N	Y Y N	FBgn0002789	36468	Mp20	Muscle protein 20
FBgn0063492	Y	Y	N	Y Y N	FBgn0063492	37113	GstE8	Glutathione S transferase E8
FBgn0063493	Y	Y	N	Y Y N	FBgn0063493	37112	GstE7	Glutathione S transferase E7
FBgn0260006	Y	Y	N	Y Y N	FBgn0260006	318102	drd	drop dead
FBgn0003308	Y	Y	N	Y Y N	FBgn0003308	41605	ry	rosy
FBgn0037676	Y	Y	N	Y Y N	FBgn0037676	41109	CG8861	CG8861
FBgn0034614	Y	Y	N	Y Y N	FBgn0034614	37431	CG9752	CG9752
FBgn0028400	Y	Y	N	Y Y N	FBgn0028400	40876	Syt4	Synaptotagmin 4
FBgn0003358	Y	Y	N	Y Y N	FBgn0003358	43545	Jon99Ci	Jonah 99Ci
FBgn0034663	Y	Y	N	Y Y N	FBgn0034663	37488	CG4363	CG4363
FBgn0038236	Y	Y	N	Y Y N	FBgn0038236	41759	Cyp313a1	Cyp313a1
FBgn0010114	Y	Y	N	Y Y N	FBgn0010114	35949	hig	hikaru genki
FBgn0261990	Y	Y	N	Y Y N	FBgn0261990	10178961	CG42808	uncharacterized protein
FBgn0031629	Y	Y	N	Y Y N	FBgn0031629	33678	Clect27	C-type lectin 27kD
FBgn0031636	Y	Y	N	Y Y N	FBgn0031636	33685	CG12194	uncharacterized protein
FBgn0262508	Y	Y	N	Y Y N	FBgn0262508	38981	CG43078	uncharacterized protein
FBgn0031645	Y	Y	N	Y Y N	FBgn0031645	33695	CG3036	CG3036
FBgn0015609	Y	Y	N	Y Y N	FBgn0015609	35070	CadN	Cadherin-N
FBgn0028481	Y	Y	N	Y Y N	FBgn0028481	33276	CG4341	CG4341
FBgn0038294	Y	Y	N	Y Y N	FBgn0038294	41824	Mf	Myofilin
FBgn0015623	Y	Y	N	Y Y N	FBgn0015623	33883	Cpr	Cytochrome P450 reductase
FBgn0035232	Y	Y	N	Y Y N	FBgn0035232	38181	CG12099	uncharacterized protein
FBgn0051272	Y	Y	N	Y Y N	FBgn0051272	326130	CG31272	uncharacterized protein
FBgn0051288	Y	Y	N	Y Y N	FBgn0051288	318664	CG31288	uncharacterized protein
FBgn0025454	Y	Y	N	Y Y N	FBgn0025454	36316	Cyp6g1	Cyp6g1
FBgn0262562	Y	Y	N	Y Y N	FBgn0262562	42137	CG43102	uncharacterized protein
FBgn0262563	Y	Y	N	Y Y N	FBgn0262563	12798325	CG43103	uncharacterized protein
FBgn0262579	Y	Y	N	Y Y N	FBgn0262579	38895	Ect4	Ectoderm-expressed 4
FBgn0262593	Y	Y	N	Y Y N	FBgn0262593	38352	Shab	Shaker cognate b
FBgn0035293	Y	Y	N	Y Y N	FBgn0035293	38255	CG5687	CG5687
FBgn0035298	Y	Y	N	Y Y N	FBgn0035298	38261	SCOT	Succinyl-CoA:3-ketoacid CoA transferase
FBgn0263106	Y	Y	N	Y Y N	FBgn0263106	38643	DnaJ-1	DnaJ-like-1
FBgn0037714	Y	Y	N	Y Y N	FBgn0037714	41156	CG9396	CG9396
FBgn0002869	Y	Y	N	Y Y N	FBgn0002869	42424	MtnB	Metallothionein B
FBgn0037721	Y	Y	N	Y Y N	FBgn0037721	41164	CG9427	CG9427
FBgn0042083	Y	Y	N	Y Y N	FBgn0042083	59261	CG3267	CG3267
FBgn0032287	Y	Y	N	Y Y N	FBgn0032287	34474	CG6415	CG6415
FBgn0037736	Y	Y	N	Y Y N	FBgn0037736	41184	CG12950	uncharacterized protein
FBgn0032297	Y	Y	N	Y Y N	FBgn0032297	34485	CG17124	uncharacterized protein
FBgn0037744	Y	Y	N	Y Y N	FBgn0037744	41192	CG8417	CG8417
FBgn0037763	Y	Y	N	Y Y N	FBgn0037763	41212	CG16904	uncharacterized protein
FBgn0037765	Y	Y	N	Y Y N	FBgn0037765	41214	CG9458	CG9458
FBgn0263199	Y	Y	N	Y Y N	FBgn0263199	39031	Galk	Galactokinase
FBgn0038302	Y	Y	N	Y Y N	FBgn0038302	41832	CG4210	CG4210
FBgn0024941	Y	Y	N	Y Y N	FBgn0024941	32674	RSG7	Regulator of G-protein signalling 7
FBgn0024943	Y	Y	N	Y Y N	FBgn0024943	31791	PIP82	PIP82
FBgn0000406	Y	Y	N	Y Y N	FBgn0000406	35008	Cyt-b5-r	Cytochrome b5-related
FBgn0031703	Y	Y	N	Y Y N	FBgn0031703	33766	CG12512	uncharacterized protein
FBgn0034789	Y	Y	N	Y Y N	FBgn0034789	37633	PIP5K59B	Phosphatidylinositol 4-phosphate 5-kinase at 59B
FBgn0010246	Y	Y	N	Y Y N	FBgn0010246	38153	Myo61F	Myosin 61F
FBgn0031732	Y	Y	N	Y Y N	FBgn0031732	33800	CG11149	uncharacterized protein
FBgn0031734	Y	Y	N	Y Y N	FBgn0031734	33803	CG11147	uncharacterized protein
FBgn0035300	Y	Y	N	Y Y N	FBgn0035300	38264	CG1139	CG1139
FBgn0051345	Y	Y	N	Y Y N	FBgn0051345	41576	CG31345	uncharacterized protein
FBgn0010263	Y	Y	N	Y Y N	FBgn0010263	33498	Rbp9	RNA-binding protein 9
FBgn0025525	Y	Y	N	Y Y N	FBgn0025525	44254	bab2	bric a brac 2
FBgn0259481	Y	Y	N	Y Y N	FBgn0259481	39293	Mob2	Mob2
FBgn0035356	Y	Y	N	Y Y N	FBgn0035356	38325	CG16986	uncharacterized protein
FBgn0086254	Y	Y	N	Y Y N	FBgn0086254	39304	CG6084	CG6084
FBgn0015766	Y	Y	N	Y Y N	FBgn0015766	38629	Msr-110	Msr-110
FBgn0015774	Y	Y	N	Y Y N	FBgn0015774	32400	NetB	Netrin-B
FBgn0015777	Y	Y	N	Y Y N	FBgn0015777	33953	nrv2	nervana 2
FBgn0042119	Y	Y	N	Y Y N	FBgn0042119	59158	Cpr65Au	Cuticular protein 65Au
FBgn0002917	Y	Y	N	Y Y N	FBgn0002917	45338	na	narrow abdomen
FBgn0029155	Y	Y	N	Y Y N	FBgn0029155	43936	Men-b	Malic enzyme b
FBgn0263200	Y	Y	N	Y Y N	FBgn0263200	33935	Galt	Galactose-1-phosphate uridylyltransferase
FBgn0002939	Y	Y	N	Y Y N	FBgn0002939	326160	ninaD	neither inactivation nor afterpotential D
FBgn0002940	Y	Y	N	Y Y N	FBgn0002940	42367	ninaE	neither inactivation nor afterpotential E
FBgn0032350	Y	Y	N	Y Y N	FBgn0032350	34554	CG6287	CG6287
FBgn0037801	Y	Y	N	Y Y N	FBgn0037801	41253	CG3999	CG3999
FBgn0032358	Y	Y	N	Y Y N	FBgn0032358	34564	Ppt2	Palmitoyl-protein Thioesterase 2
FBgn0037819	Y	Y	N	Y Y N	FBgn0037819	41275	CG14688	uncharacterized protein
FBgn0026144	Y	Y	N	Y Y N	FBgn0026144	31669	CBP	sarcoplasmic calcium-binding protein
FBgn0032382	Y	Y	N	Y Y N	FBgn0032382	34598	Mal-B2	Maltase B2
FBgn0032387	Y	Y	N	Y Y N	FBgn0032387	34607	CG16965	uncharacterized protein
FBgn0263256	Y	Y	N	Y Y N	FBgn0263256	318843	CG43394	uncharacterized protein
FBgn0263257	Y	Y	N	Y Y N	FBgn0263257	32468	Cngl	Cyclic nucleotide-gated ion channel-like
FBgn0032394	Y	Y	N	Y Y N	FBgn0032394	34614	CG6746	CG6746
FBgn0013307	Y	Y	N	Y Y N	FBgn0013307	35766	Odc1	Ornithine decarboxylase 1
FBgn0037873	Y	Y	N	Y Y N	FBgn0037873	41340	SdhC	Succinate dehydrogenase, subunit C
FBgn0026197	Y	Y	N	Y Y N	FBgn0026197	43918	noe	ncRNA
FBgn0023129	Y	Y	N	Y Y N	FBgn0023129	39085	aay	astray
FBgn0013342	Y	Y	N	Y Y N	FBgn0013342	38196	nSyb	neuronal Synaptobrevin
FBgn0013348	Y	Y	N	Y Y N	FBgn0013348	35473	TpnC41C	Troponin C at 41C
FBgn0038420	Y	Y	N	Y Y N	FBgn0038420	41984	CG10311	uncharacterized protein
FBgn0034860	Y	Y	N	Y Y N	FBgn0034860	37709	CG9812	CG9812
FBgn0000504	Y	Y	N	Y Y N	FBgn0000504	40940	dsx	doublesex
FBgn0010315	Y	Y	N	Y Y N	FBgn0010315	32551	CycD	Cyclin D
FBgn0031801	Y	Y	N	Y Y N	FBgn0031801	33885	CG9498	CG9498
FBgn0023197	Y	Y	N	Y Y N	FBgn0023197	39959	Jon74E	Jonah 74E
FBgn0034887	Y	Y	N	Y Y N	FBgn0034887	37742	St1	Sulfotransferase 1
FBgn0000536	Y	Y	N	Y Y N	FBgn0000536	32585	eas	easily shocked
FBgn0031824	Y	Y	N	Y Y N	FBgn0031824	33911	CG9547	CG9547
FBgn0038463	Y	Y	N	Y Y N	FBgn0038463	42047	CG3534	CG3534
FBgn0038466	Y	Y	N	Y Y N	FBgn0038466	42050	CG8907	CG8907
FBgn0038467	Y	Y	N	Y Y N	FBgn0038467	42051	AdSL	Adenylosuccinate Lyase
FBgn0004117	Y	Y	N	Y Y N	FBgn0004117	41853	Tm2	Tropomyosin 2
FBgn0010357	Y	Y	N	Y Y N	FBgn0010357	47901	betaTry	betaTrypsin
FBgn0000557	Y	Y	N	Y Y N	FBgn0000557	43736	Ef1alpha100E	Elongation factor 1alpha100E
FBgn0035409	Y	Y	N	Y Y N	FBgn0035409	38383	CG14963	uncharacterized protein
FBgn0035410	Y	Y	N	Y Y N	FBgn0035410	38384	CG14964	uncharacterized protein
FBgn0031850	Y	Y	N	Y Y N	FBgn0031850	33941	Tsp	Thrombospondin
FBgn0000568	Y	Y	N	Y Y N	FBgn0000568	39999	Eip75B	Ecdysone-induced protein 75B
FBgn0025625	Y	Y	N	Y Y N	FBgn0025625	31170	Sik2	Salt-inducible kinase 2
FBgn0031869	Y	Y	N	Y Y N	FBgn0031869	33969	CG18304	uncharacterized protein
FBgn0035452	Y	Y	N	Y Y N	FBgn0035452	38434	CG10359	uncharacterized protein
FBgn0004169	Y	Y	N	Y Y N	FBgn0004169	32314	up	upheld
FBgn0039024	Y	Y	N	Y Y N	FBgn0039024	42701	CG4721	CG4721
FBgn0086359	Y	Y	N	Y Y N	FBgn0086359	49580	Invadolysin	invadolysin
FBgn0039030	Y	Y	N	Y Y N	FBgn0039030	42708	CG6660	CG6660
FBgn0035471	Y	Y	N	Y Y N	FBgn0035471	38457	Sc2	Sc2
FBgn0086367	Y	Y	N	Y Y N	FBgn0086367	31863	t	tan
FBgn0266354	Y	Y	N	Y Y N	FBgn0266354	32688	CG45002	uncharacterized protein
FBgn0001124	Y	Y	N	Y Y N	FBgn0001124	36782	Got1	Glutamate oxaloacetate transaminase 1
FBgn0025687	Y	Y	N	Y Y N	FBgn0025687	34064	LKRSDH	Lysine ketoglutarate reductase/saccharopine dehydrogenase
FBgn0001125	Y	Y	N	Y Y N	FBgn0001125	33373	Got2	Glutamate oxaloacetate transaminase 2
FBgn0039054	Y	Y	N	Y Y N	FBgn0039054	42733	Cow	Carrier of Wingless
FBgn0035490	Y	Y	N	Y Y N	FBgn0035490	38479	CG1136	CG1136
FBgn0035495	Y	Y	N	Y Y N	FBgn0035495	38485	CG14989	uncharacterized protein
FBgn0001137	Y	Y	N	Y Y N	FBgn0001137	34171	grk	gurken
FBgn0032433	Y	Y	N	Y Y N	FBgn0032433	34660	Oatp33Ea	Organic anion transporting polypeptide 33Ea
FBgn0039085	Y	Y	N	Y Y N	FBgn0039085	42774	CG10170	uncharacterized protein
FBgn0036015	Y	Y	N	Y Y N	FBgn0036015	39115	CG3088	CG3088
FBgn0052054	Y	Y	N	Y Y N	FBgn0052054	326185	CG32054	uncharacterized protein
FBgn0263336	Y	Y	N	Y Y N	FBgn0263336	12798319	CR43417	ncRNA
FBgn0036030	Y	Y	N	Y Y N	FBgn0036030	39132	CG6767	CG6767
FBgn0052082	Y	Y	N	Y Y N	FBgn0052082	39258	IRSp53	IRSp53
FBgn0263354	Y	Y	N	Y Y N	FBgn0263354	326165	CG42784	uncharacterized protein
FBgn0032495	Y	Y	N	Y Y N	FBgn0032495	34730	CG16820	uncharacterized protein
FBgn0053988	Y	Y	N	Y Y N	FBgn0053988	37953	Mid1	Mid1
FBgn0037973	Y	Y	N	Y Y N	FBgn0037973	41452	CG18547	uncharacterized protein
FBgn0023212	Y	Y	N	Y Y N	FBgn0023212	42435	EloB	Elongin B
FBgn0034903	Y	Y	N	Y Y N	FBgn0034903	37762	CG9850	CG9850
FBgn0036094	Y	Y	N	Y Y N	FBgn0036094	39208	CG14153	uncharacterized protein
FBgn0037989	Y	Y	N	Y Y N	FBgn0037989	41469	ATP8B	ATPase 8B
FBgn0037996	Y	Y	N	Y Y N	FBgn0037996	41477	CG4830	CG4830
FBgn0034920	Y	Y	N	Y Y N	FBgn0034920	37789	CG5597	CG5597
FBgn0085813	Y	Y	N	Y Y N	FBgn0085813	5740420	18SrRNA-Psi:CR41602	18S ribosomal RNA pseudogene:CR41602
FBgn0033047	Y	Y	N	Y Y N	FBgn0033047	35520	CG7882	CG7882
FBgn0028704	Y	Y	N	Y Y N	FBgn0028704	45248	Nckx30C	Nckx30C
FBgn0033065	Y	Y	N	Y Y N	FBgn0033065	35543	Cyp6w1	Cyp6w1
FBgn0033079	Y	Y	N	Y Y N	FBgn0033079	35561	Fmo-2	Flavin-containing monooxygenase 2
FBgn0260388	Y	Y	N	Y Y N	FBgn0260388	8674108	CG42514	uncharacterized protein
FBgn0030013	Y	Y	N	Y Y N	FBgn0030013	31747	GIIIspla2	Phospholipase A2 group III
FBgn0041707	Y	Y	N	Y Y N	FBgn0041707	40644	7B2	7B2
FBgn0031908	Y	Y	N	Y Y N	FBgn0031908	34017	CG5177	CG5177
FBgn0010424	Y	Y	N	Y Y N	FBgn0010424	39916	TpnC73F	Troponin C at 73F
FBgn0010425	Y	Y	N	Y Y N	FBgn0010425	49080	epsilonTry	epsilonTrypsin
FBgn0031913	Y	Y	N	Y Y N	FBgn0031913	34022	CG5958	CG5958
FBgn0031914	Y	Y	N	Y Y N	FBgn0031914	34023	CG5973	CG5973
FBgn0034997	Y	Y	N	Y Y N	FBgn0034997	37884	CG3376	CG3376
FBgn0010435	Y	Y	N	Y Y N	FBgn0010435	37999	emp	epithelial membrane protein
FBgn0051522	Y	Y	N	Y Y N	FBgn0051522	40567	CG31522	uncharacterized protein
FBgn0051523	Y	Y	N	Y Y N	FBgn0051523	326148	CG31523	uncharacterized protein
FBgn0030041	Y	Y	N	Y Y N	FBgn0030041	31782	CG12116	uncharacterized protein
FBgn0025702	Y	Y	N	Y Y N	FBgn0025702	40461	Srpk79D	Serine-arginine protein kinase at 79D
FBgn0031942	Y	Y	N	Y Y N	FBgn0031942	34055	CG7203	CG7203
FBgn0051547	Y	Y	N	Y Y N	FBgn0051547	40663	CG31547	uncharacterized protein
FBgn0051548	Y	Y	N	Y Y N	FBgn0051548	318794	CG31548	uncharacterized protein
FBgn0025709	Y	Y	N	Y Y N	FBgn0025709	35914	CG8083	CG8083
FBgn0014028	Y	Y	N	Y Y N	FBgn0014028	35590	SdhB	Succinate dehydrogenase, subunit B (iron-sulfur)
FBgn0030067	Y	Y	N	Y Y N	FBgn0030067	31818	Rbm13	RNA-binding motif protein 13
FBgn0061356	Y	Y	N	Y Y N	FBgn0061356	3771779	CG18003	uncharacterized protein
FBgn0014031	Y	Y	N	Y Y N	FBgn0014031	31587	Spat	Serine pyruvate aminotransferase
FBgn0010470	Y	Y	N	Y Y N	FBgn0010470	37449	Fkbp14	FK506-binding protein 14
FBgn0010473	Y	Y	N	Y Y N	FBgn0010473	46015	tutl	turtle
FBgn0010482	Y	Y	N	Y Y N	FBgn0010482	46017	l(2)01289	lethal (2) 01289
FBgn0259678	Y	Y	N	Y Y N	FBgn0259678	36002	sqa	spaghetti-squash activator
FBgn0259682	Y	Y	N	Y Y N	FBgn0259682	37164	Jabba	jabba
FBgn0035542	Y	Y	N	Y Y N	FBgn0035542	38543	DOR	Diabetes and obesity regulated
FBgn0266417	Y	Y	N	Y Y N	FBgn0266417	39813	CG45057	uncharacterized protein
FBgn0041789	Y	Y	N	Y Y N	FBgn0041789	35215	Pax	Paxillin
FBgn0262867	Y	Y	N	Y Y N	FBgn0262867	35546	Ptr	Patched-related
FBgn0086450	Y	Y	N	Y Y N	FBgn0086450	31858	su(r)	suppressor of rudimentary
FBgn0001208	Y	Y	N	Y Y N	FBgn0001208	38871	Hn	Henna
FBgn0266446	Y	Y	N	Y Y N	FBgn0266446	19834760	CG45076	uncharacterized protein
FBgn0266448	Y	Y	N	Y Y N	FBgn0266448	19836061	CG45078	uncharacterized protein
FBgn0039151	Y	Y	N	Y Y N	FBgn0039151	42859	CG13607	uncharacterized protein
FBgn0001233	Y	Y	N	Y Y N	FBgn0001233	38389	Hsp83	Heat shock protein 83
FBgn0039184	Y	Y	N	Y Y N	FBgn0039184	42901	CG6432	CG6432
FBgn0001263	Y	Y	N	Y Y N	FBgn0001263	37629	inaD	inactivation no afterpotential D
FBgn0026315	Y	Y	N	Y Y N	FBgn0026315	41334	Ugt35a	UDP-glycosyltransferase 35a
FBgn0263456	Y	Y	N	Y Y N	FBgn0263456	39052	nwk	nervous wreck
FBgn0036196	Y	Y	N	Y Y N	FBgn0036196	39319	CG11658	uncharacterized protein
FBgn0044812	Y	Y	N	Y Y N	FBgn0044812	117462	TotC	Turandot C
FBgn0038631	Y	Y	N	Y Y N	FBgn0038631	42234	CG7695	CG7695
FBgn0260499	Y	Y	N	Y Y N	FBgn0260499	2768718	qvr	quiver
FBgn0265959	Y	Y	N	Y Y N	FBgn0265959	40224	rdgC	retinal degeneration C
FBgn0051619	Y	Y	N	Y Y N	FBgn0051619	35424	nolo	no long nerve cord
FBgn0038652	Y	Y	N	Y Y N	FBgn0038652	42257	CG7720	CG7720
FBgn0038653	Y	Y	N	Y Y N	FBgn0038653	42258	CG18208	uncharacterized protein
FBgn0264078	Y	Y	N	Y Y N	FBgn0264078	32425	Flo2	Flotillin 2
FBgn0264089	Y	Y	N	Y Y N	FBgn0264089	36746	sli	slit
FBgn0259736	Y	Y	N	Y Y N	FBgn0259736	42600	CG42390	uncharacterized protein
FBgn0069969	Y	Y	N	Y Y N	FBgn0069969	3354890	CG40498	uncharacterized protein
FBgn0038681	Y	Y	N	Y Y N	FBgn0038681	42294	Cyp12a4	Cyp12a4
FBgn0265991	Y	Y	N	Y Y N	FBgn0265991	36740	Zasp52	Z band alternatively spliced PDZ-motif protein 52
FBgn0035620	Y	Y	N	Y Y N	FBgn0035620	38633	CG5150	CG5150
FBgn0051663	Y	Y	N	Y Y N	FBgn0051663	33363	CG31663	uncharacterized protein
FBgn0051665	Y	Y	N	Y Y N	FBgn0051665	33361	wry	weary
FBgn0020385	Y	Y	N	Y Y N	FBgn0020385	41279	pug	pugilist
FBgn0039213	Y	Y	N	Y Y N	FBgn0039213	42934	atl	atlastin
FBgn0004367	Y	Y	N	Y Y N	FBgn0004367	32608	mei-41	meiotic 41
FBgn0035661	Y	Y	N	Y Y N	FBgn0035661	38679	CG10477	uncharacterized protein
FBgn0032601	Y	Y	N	Y Y N	FBgn0032601	35005	yellow-b	yellow-b
FBgn0039241	Y	Y	N	Y Y N	FBgn0039241	42973	CG11089	uncharacterized protein
FBgn0052221	Y	Y	N	Y Y N	FBgn0052221	317924	CG32221	uncharacterized protein
FBgn0036203	Y	Y	N	Y Y N	FBgn0036203	39326	Muc68D	Mucin 68D
FBgn0263510	Y	Y	N	Y Y N	FBgn0263510	36150	nclb	no child left behind
FBgn0036208	Y	Y	N	Y Y N	FBgn0036208	39333	CG10361	uncharacterized protein
FBgn0039298	Y	Y	N	Y Y N	FBgn0039298	43036	to	takeout
FBgn0032666	Y	Y	N	Y Y N	FBgn0032666	35083	CG5758	CG5758
FBgn0032668	Y	Y	N	Y Y N	FBgn0032668	35086	CG17681	uncharacterized protein
FBgn0026438	Y	Y	N	Y Y N	FBgn0026438	33247	Eaat2	Excitatory amino acid transporter 2
FBgn0052280	Y	Y	N	Y Y N	FBgn0052280	317952	CG32280	uncharacterized protein
FBgn0032681	Y	Y	N	Y Y N	FBgn0032681	35102	CG10283	uncharacterized protein
FBgn0036262	Y	Y	N	Y Y N	FBgn0036262	39391	CG6910	CG6910
FBgn0036287	Y	Y	N	Y Y N	FBgn0036287	39421	CG10663	uncharacterized protein
FBgn0016687	Y	Y	N	Y Y N	FBgn0016687	37922	Nurf-38	Nucleosome remodeling factor - 38kD
FBgn0033216	Y	Y	N	Y Y N	FBgn0033216	35720	CG1946	CG1946
FBgn0023416	Y	Y	N	Y Y N	FBgn0023416	35419	Ac3	Ac3
FBgn0003861	Y	Y	N	Y Y N	FBgn0003861	43542	trp	transient receptor potential
FBgn0003863	Y	Y	N	Y Y N	FBgn0003863	48316	alphaTry	alphaTrypsin
FBgn0038717	Y	Y	N	Y Y N	FBgn0038717	42336	CG17751	uncharacterized protein
FBgn0038718	Y	Y	N	Y Y N	FBgn0038718	42337	CG17752	uncharacterized protein
FBgn0033274	Y	Y	N	Y Y N	FBgn0033274	35797	CG14757	uncharacterized protein
FBgn0023477	Y	Y	N	Y Y N	FBgn0023477	37804	Taldo	Transaldolase
FBgn0033292	Y	Y	N	Y Y N	FBgn0033292	35821	Cyp4ad1	Cyp4ad1
FBgn0038752	Y	Y	N	Y Y N	FBgn0038752	42376	CG4462	CG4462
FBgn0038774	Y	Y	N	Y Y N	FBgn0038774	42400	CG5023	CG5023
FBgn0040064	Y	Y	N	Y Y N	FBgn0040064	34313	yip2	yippee interacting protein 2
FBgn0038790	Y	Y	N	Y Y N	FBgn0038790	42416	MtnC	Metallothionein C
FBgn0038795	Y	Y	N	Y Y N	FBgn0038795	42421	CG4335	CG4335
FBgn0028996	Y	Y	N	Y Y N	FBgn0028996	45816	onecut	onecut
FBgn0030272	Y	Y	N	Y Y N	FBgn0030272	32053	CG15201	uncharacterized protein
FBgn0030294	Y	Y	N	Y Y N	FBgn0030294	32079	Pa1	PTIP associated 1
FBgn0039311	Y	Y	N	Y Y N	FBgn0039311	43051	CG10513	uncharacterized protein
FBgn0039312	Y	Y	N	Y Y N	FBgn0039312	43052	CG10514	uncharacterized protein
FBgn0039313	Y	Y	N	Y Y N	FBgn0039313	43053	CG11892	uncharacterized protein
FBgn0039319	Y	Y	N	Y Y N	FBgn0039319	43059	CG13659	uncharacterized protein
FBgn0039321	Y	Y	N	Y Y N	FBgn0039321	43061	CG10550	uncharacterized protein
FBgn0039323	Y	Y	N	Y Y N	FBgn0039323	43063	CG10559	uncharacterized protein
FBgn0039326	Y	Y	N	Y Y N	FBgn0039326	43066	CG10562	uncharacterized protein
FBgn0035770	Y	Y	N	Y Y N	FBgn0035770	38818	pst	pastrel
FBgn0035779	Y	Y	N	Y Y N	FBgn0035779	38828	CG8562	CG8562
FBgn0035780	Y	Y	N	Y Y N	FBgn0035780	38829	CG18417	uncharacterized protein
FBgn0035781	Y	Y	N	Y Y N	FBgn0035781	38830	CG8560	CG8560
FBgn0052311	Y	Y	N	Y Y N	FBgn0052311	2769001	zormin	zormin
FBgn0032713	Y	Y	N	Y Y N	FBgn0032713	35138	CG17323	uncharacterized protein
FBgn0086687	Y	Y	N	Y Y N	FBgn0086687	117369	Desat1	Desaturase 1
FBgn0086691	Y	Y	N	Y Y N	FBgn0086691	34897	UK114	UK114
FBgn0052354	Y	Y	N	Y Y N	FBgn0052354	50302	CG32354	uncharacterized protein
FBgn0036316	Y	Y	N	Y Y N	FBgn0036316	39458	CG10960	uncharacterized protein
FBgn0016715	Y	Y	N	Y Y N	FBgn0016715	38075	Reg-2	Rhythmically expressed gene 2
FBgn0011286	Y	Y	N	Y Y N	FBgn0011286	49090	RyR	Ryanodine receptor
FBgn0011288	Y	Y	N	Y Y N	FBgn0011288	3355084	Snap25	Synaptosomal-associated protein 25kDa
FBgn0032797	Y	Y	N	Y Y N	FBgn0032797	35238	Hasp	Hig-anchoring scaffold protein
FBgn0026576	Y	Y	N	Y Y N	FBgn0026576	42849	CG5991	CG5991
FBgn0033302	Y	Y	N	Y Y N	FBgn0033302	35835	Cyp6a14	Cyp6a14
FBgn0023507	Y	Y	N	Y Y N	FBgn0023507	31184	D2hgdh	D-2-hydroxyglutaric acid dehydrogenase
FBgn0026593	Y	Y	N	Y Y N	FBgn0026593	48422	CG5707	CG5707
FBgn0250836	Y	Y	N	Y Y N	FBgn0250836	38783	CG8628	CG8628
FBgn0023535	Y	Y	N	Y Y N	FBgn0023535	46717	arg	arginase
FBgn0023537	Y	Y	N	Y Y N	FBgn0023537	30995	CG17896	uncharacterized protein
FBgn0023549	Y	Y	N	Y Y N	FBgn0023549	31198	Mct1	Monocarboxylate transporter 1
FBgn0260657	Y	Y	N	Y Y N	FBgn0260657	38562	CG42540	uncharacterized protein
FBgn0260658	Y	Y	N	Y Y N	FBgn0260658	31344	CG42541	uncharacterized protein
FBgn0003961	Y	Y	N	Y Y N	FBgn0003961	34060	Uro	Urate oxidase
FBgn0013763	Y	Y	N	Y Y N	FBgn0013763	36868	Idgf6	Imaginal disc growth factor 6
FBgn0038820	Y	Y	N	Y Y N	FBgn0038820	42451	CG4000	CG4000
FBgn0038839	Y	Y	N	Y Y N	FBgn0038839	42475	Ktl	Kctd12-like
FBgn0020513	Y	Y	N	Y Y N	FBgn0020513	32228	ade5	ade5
FBgn0003996	Y	Y	N	Y Y N	FBgn0003996	31271	w	white
FBgn0264273	Y	Y	N	Y Y N	FBgn0264273	246538	Sema2b	Semaphorin 2b
FBgn0038858	Y	Y	N	Y Y N	FBgn0038858	42505	CG5793	CG5793
FBgn0004512	Y	Y	N	Y Y N	FBgn0004512	36428	Mdr49	Multi drug resistance 49
FBgn0004516	Y	Y	N	Y Y N	FBgn0004516	38484	Gad1	Glutamic acid decarboxylase 1
FBgn0035815	Y	Y	N	Y Y N	FBgn0035815	38868	Snmp2	Sensory neuron membrane protein 2
FBgn0035817	Y	Y	N	Y Y N	FBgn0035817	38870	CG7409	CG7409
FBgn0259994	Y	Y	N	Y Y N	FBgn0259994	8674066	CG42492	uncharacterized protein
FBgn0259998	Y	Y	N	Y Y N	FBgn0259998	35409	CG17571	uncharacterized protein
FBgn0039419	Y	Y	N	Y Y N	FBgn0039419	43182	CG12290	uncharacterized protein
FBgn0004575	Y	Y	N	Y Y N	FBgn0004575	41247	Syn	Synapsin
FBgn0024179	Y	Y	N	Y Y N	FBgn0024179	44096	wit	wishful thinking
FBgn0004580	Y	Y	N	Y Y N	FBgn0004580	36905	Cbp53E	Calbindin 53E
FBgn0014396	Y	Y	N	Y Y N	FBgn0014396	33571	tim	timeless
FBgn0266756	Y	Y	N	Y Y N	FBgn0266756	3346167	btsz	bitesize
FBgn0266758	Y	Y	N	Y Y N	FBgn0266758	42929	Esyt2	Extended synaptotagmin-like protein 2
FBgn0039452	Y	Y	N	Y Y N	FBgn0039452	3772449	CG14245	uncharacterized protein
FBgn0032820	Y	Y	N	Y Y N	FBgn0032820	35265	fbp	fructose-1,6-bisphosphatase
FBgn0042627	Y	Y	N	Y Y N	FBgn0042627	117361	FASN2	Fatty acid synthase 2
FBgn0032839	Y	Y	N	Y Y N	FBgn0032839	35285	CG10659	uncharacterized protein
FBgn0039471	Y	Y	N	Y Y N	FBgn0039471	43247	CG6295	CG6295
FBgn0039475	Y	Y	N	Y Y N	FBgn0039475	43251	CG6277	CG6277
FBgn0032840	Y	Y	N	Y Y N	FBgn0032840	35286	sNPF	short neuropeptide F precursor
FBgn0039486	Y	Y	N	Y Y N	FBgn0039486	43264	caix	caix
FBgn0032857	Y	Y	N	Y Y N	FBgn0032857	35309	CG10947	uncharacterized protein
FBgn0263748	Y	Y	N	Y Y N	FBgn0263748	14462401	CG43673	uncharacterized protein
FBgn0052483	Y	Y	N	Y Y N	FBgn0052483	318050	CG32483	uncharacterized protein
FBgn0036449	Y	Y	N	Y Y N	FBgn0036449	39611	bmm	brummer
FBgn0032889	Y	Y	N	Y Y N	FBgn0032889	35347	CG9331	CG9331
FBgn0264308	Y	Y	N	Y Y N	FBgn0264308	34738	CG43778	uncharacterized protein
FBgn0260745	Y	Y	N	Y Y N	FBgn0260745	41455	mfas	midline fasciclin
FBgn0033446	Y	Y	N	Y Y N	FBgn0033446	36009	CG1648	CG1648
FBgn0037010	Y	Y	N	Y Y N	FBgn0037010	40281	CG4825	CG4825
FBgn0033465	Y	Y	N	Y Y N	FBgn0033465	36031	Etf-QO	Electron transfer flavoprotein-ubiquinone oxidoreductase
FBgn0038919	Y	Y	N	Y Y N	FBgn0038919	42583	CG17843	uncharacterized protein
FBgn0050008	Y	Y	N	Y Y N	FBgn0050008	246388	CG30008	uncharacterized protein
FBgn0033483	Y	Y	N	Y Y N	FBgn0033483	36054	egr	eiger
FBgn0033484	Y	Y	N	Y Y N	FBgn0033484	36056	CG2269	CG2269
FBgn0033485	Y	Y	N	Y Y N	FBgn0033485	36058	RpLP0-like	Ribosomal protein LP0-like
FBgn0040211	Y	Y	N	Y Y N	FBgn0040211	34552	hgo	homogentisate 1,2-dioxygenase
FBgn0050015	Y	Y	N	Y Y N	FBgn0050015	36147	CG30015	uncharacterized protein
FBgn0038938	Y	Y	N	Y Y N	FBgn0038938	42606	CG7084	CG7084
FBgn0037057	Y	Y	N	Y Y N	FBgn0037057	40339	CG10512	uncharacterized protein
FBgn0030425	Y	Y	N	Y Y N	FBgn0030425	32234	CG3775	CG3775
FBgn0037063	Y	Y	N	Y Y N	FBgn0037063	40346	CG9391	CG9391
FBgn0050043	Y	Y	N	Y Y N	FBgn0050043	246412	CG30043	uncharacterized protein
FBgn0038972	Y	Y	N	Y Y N	FBgn0038972	42643	CG7054	CG7054
FBgn0038975	Y	Y	N	Y Y N	FBgn0038975	42646	Nrx-1	Neurexin 1
FBgn0040256	Y	Y	N	Y Y N	FBgn0040256	53507	Ugt86Dd	Ugt86Dd
FBgn0035904	Y	Y	N	Y Y N	FBgn0035904	38972	GstO3	Glutathione S transferase O3
FBgn0037090	Y	Y	N	Y Y N	FBgn0037090	40381	Est-Q	Esterase Q
FBgn0035917	Y	Y	N	Y Y N	FBgn0035917	38988	Zasp66	Z band alternatively spliced PDZ-motif protein 66
FBgn0051956	Y	Y	N	Y Y N	FBgn0051956	261610	pgant4	polypeptide GalNAc transferase 4
FBgn0030478	Y	Y	N	Y Y N	FBgn0030478	32292	CG1640	CG1640
FBgn0040281	Y	Y	N	Y Y N	FBgn0040281	53472	Aplip1	APP-like protein interacting protein 1
FBgn0030482	Y	Y	N	Y Y N	FBgn0030482	32297	CG1673	CG1673
FBgn0004652	Y	Y	N	Y Y N	FBgn0004652	42226	fru	fruitless
FBgn0029708	Y	Y	N	Y Y N	FBgn0029708	31380	CG3556	CG3556
FBgn0034065	Y	Y	N	Y Y N	FBgn0034065	36766	Rrp42	Rrp42
FBgn0014469	Y	Y	N	Y Y N	FBgn0014469	35822	Cyp4e2	Cytochrome P450-4e2
FBgn0051999	Y	Y	N	Y Y N	FBgn0051999	43777	CG31999	uncharacterized protein
FBgn0039527	Y	Y	N	Y Y N	FBgn0039527	43314	CG5639	CG5639
FBgn0039529	Y	Y	N	Y Y N	FBgn0039529	43316	CG5612	CG5612
FBgn0019928	Y	Y	N	Y Y N	FBgn0019928	36489	Ser8	Ser8
FBgn0035968	Y	Y	N	Y Y N	FBgn0035968	39055	Slc45-1	Solute carrier family 45 member 1
FBgn0019940	Y	Y	N	Y Y N	FBgn0019940	41889	Rh6	Rhodopsin 6
FBgn0035982	Y	Y	N	Y Y N	FBgn0035982	39074	CG4461	CG4461
FBgn0035985	Y	Y	N	Y Y N	FBgn0035985	39081	Cpr67B	Cuticular protein 67B
FBgn0032913	Y	Y	N	Y Y N	FBgn0032913	35372	CG9259	CG9259
FBgn0019952	Y	Y	N	Y Y N	FBgn0019952	42891	Orct	Organic cation transporter
FBgn0029769	Y	Y	N	Y Y N	FBgn0029769	31464	frma	fra mauro
FBgn0032935	Y	Y	N	Y Y N	FBgn0032935	35396	Atg18b	Autophagy-related 18b
FBgn0015011	Y	Y	N	Y Y N	FBgn0015011	42043	AhcyL2	Adenosylhomocysteinase like 2
FBgn0052549	Y	Y	N	Y Y N	FBgn0052549	32822	CG32549	uncharacterized protein
FBgn0031065	Y	Y	N	Y Y N	FBgn0031065	32988	CG14234	uncharacterized protein
FBgn0039594	Y	Y	N	Y Y N	FBgn0039594	43391	CG9990	CG9990
FBgn0015035	Y	Y	N	Y Y N	FBgn0015035	34291	Cyp4e3	Cytochrome P450-4e3
FBgn0015037	Y	Y	N	Y Y N	FBgn0015037	45524	Cyp4p1	Cytochrome P450-4p1
FBgn0032961	Y	Y	N	Y Y N	FBgn0032961	35426	CG1416	CG1416
FBgn0031089	Y	Y	N	Y Y N	FBgn0031089	33013	CG9572	CG9572
FBgn0036553	Y	Y	N	Y Y N	FBgn0036553	39742	CG17027	uncharacterized protein
FBgn0005278	Y	Y	N	Y Y N	FBgn0005278	48552	Sam-S	S-adenosylmethionine Synthetase
FBgn0283471	Y	Y	N	Y Y N	FBgn0283471	32794	wupA	wings up A
FBgn0267435	Y	Y	N	Y Y N	FBgn0267435	43690	chp	chaoptin
FBgn0033504	Y	Y	N	Y Y N	FBgn0033504	36084	CAP	CAP
FBgn0053110	Y	Y	N	Y Y N	FBgn0053110	42659	CG33110	uncharacterized protein
FBgn0033518	Y	Y	N	Y Y N	FBgn0033518	36098	Prx2540-2	Peroxiredoxin 2540-2
FBgn0012034	Y	Y	N	Y Y N	FBgn0012034	40348	AcCoAS	Acetyl Coenzyme A synthase
FBgn0012036	Y	Y	N	Y Y N	FBgn0012036	34256	Aldh	Aldehyde dehydrogenase
FBgn0012037	Y	Y	N	Y Y N	FBgn0012037	34805	Ance	Angiotensin converting enzyme
FBgn0053127	Y	Y	N	Y Y N	FBgn0053127	318893	CG33127	uncharacterized protein
FBgn0037126	Y	Y	N	Y Y N	FBgn0037126	40420	CG14567	uncharacterized protein
FBgn0033564	Y	Y	N	Y Y N	FBgn0033564	3772165	Pex6	Peroxin 6
FBgn0033574	Y	Y	N	Y Y N	FBgn0033574	36163	Spn47C	Serpin 47C
FBgn0053179	Y	Y	N	Y Y N	FBgn0053179	35031	beat-IIIb	beat-IIIb
FBgn0040309	Y	Y	N	Y Y N	FBgn0040309	53578	Jafrac1	thioredoxin peroxidase 1
FBgn0037140	Y	Y	N	Y Y N	FBgn0037140	40437	SLC22A	SLC22A family member
FBgn0053181	Y	Y	N	Y Y N	FBgn0053181	318916	CG33181	uncharacterized protein
FBgn0264489	Y	Y	N	Y Y N	FBgn0264489	39153	CG43897	uncharacterized protein
FBgn0040342	Y	Y	N	Y Y N	FBgn0040342	53540	CG3706	CG3706
FBgn0031248	N	Y	N	N Y N	FBgn0031248	33205	CG11912	uncharacterized protein
FBgn0036766	N	Y	N	N Y N	FBgn0036766	39992	CG5506	CG5506
FBgn0037396	N	Y	N	N Y N	FBgn0037396	40741	CG11459	uncharacterized protein
FBgn0032049	N	Y	N	N Y N	FBgn0032049	34182	Bace	beta-site APP-cleaving enzyme
FBgn0034500	N	Y	N	N Y N	FBgn0034500	37301	CG11200	Carbonyl reductase
FBgn0035266	N	Y	N	N Y N	FBgn0035266	38221	Gk2	Glycerol kinase 2
FBgn0028519	N	Y	N	N Y N	FBgn0028519	34822	hll	heimdall
FBgn0085810	N	Y	N	N Y N	FBgn0085810	5740383	CR41597	pseudo
FBgn0030098	N	Y	N	N Y N	FBgn0030098	31854	CG12057	uncharacterized protein
FBgn0259748	N	Y	N	N Y N	FBgn0259748	8673976	CG42397	uncharacterized protein
FBgn0040069	N	Y	N	N Y N	FBgn0040069	31551	vanin-like	vanin-like
FBgn0004429	N	Y	N	N Y N	FBgn0004429	38129	LysP	Lysozyme P
FBgn0035718	N	Y	N	N Y N	FBgn0035718	38754	CG14820	uncharacterized protein
FBgn0035768	N	Y	N	N Y N	FBgn0035768	38814	CG14834	uncharacterized protein
FBgn0017448	N	Y	N	N Y N	FBgn0017448	43743	CG2187	CG2187
FBgn0031034	N	Y	N	N Y N	FBgn0031034	32952	CG14205	uncharacterized protein
FBgn0043364	N	Y	N	N Y N	FBgn0043364	33224	cbt	cabut
FBgn0040305	N	Y	N	N Y N	FBgn0040305	39089	MTF-1	Metal response element-binding Transcri

## Sheet: DxS
gene	S	D	SxD	combo	FLYBASE	ENTREZ	SYMBOL	GENENAME
FBgn0010241	Y	N	Y	Y N Y	FBgn0010241	36582	Mdr50	Multi drug resistance 50
FBgn0013772	Y	N	Y	Y N Y	FBgn0013772	36666	Cyp6a8	Cytochrome P450-6a8
FBgn0015001	Y	N	Y	Y N Y	FBgn0015001	36223	iotaTry	iotaTrypsin
FBgn0015010	Y	N	Y	Y N Y	FBgn0015010	44631	Ag5r	Antigen 5-related
FBgn0016076	Y	N	Y	Y N Y	FBgn0016076	33759	vri	vrille
FBgn0016684	Y	N	Y	Y N Y	FBgn0016684	36651	NaPi-T	Na[+]-dependent inorganic phosphate cotransporter
FBgn0020416	Y	N	Y	Y N Y	FBgn0020416	34978	Idgf1	Imaginal disc growth factor 1
FBgn0027578	Y	N	Y	Y N Y	FBgn0027578	43413	CG14526	uncharacterized protein
FBgn0028473	Y	N	Y	Y N Y	FBgn0028473	35963	Non1	Novel nucleolar protein 1
FBgn0028491	Y	N	Y	Y N Y	FBgn0028491	31341	CG2930	CG2930
FBgn0029827	Y	N	Y	Y N Y	FBgn0029827	31528	CG6048	CG6048
FBgn0030323	Y	N	Y	Y N Y	FBgn0030323	32116	CG2371	CG2371
FBgn0030816	Y	N	Y	Y N Y	FBgn0030816	32694	CG16700	uncharacterized protein
FBgn0030837	N	N	Y	N N Y	FBgn0030837	32720	CG8661	CG8661
FBgn0031110	Y	N	Y	Y N Y	FBgn0031110	33038	Obp19b	Odorant-binding protein 19b
FBgn0031653	Y	N	Y	Y N Y	FBgn0031653	33706	Jon25Biii	Jonah 25Biii
FBgn0032505	Y	N	Y	Y N Y	FBgn0032505	34741	CG16826	uncharacterized protein
FBgn0032538	Y	N	Y	Y N Y	FBgn0032538	34811	CG16885	uncharacterized protein
FBgn0032620	Y	N	Y	Y N Y	FBgn0032620	35027	CG12288	uncharacterized protein
FBgn0032684	Y	N	Y	Y N Y	FBgn0032684	35105	CG10178	uncharacterized protein
FBgn0032945	Y	N	Y	Y N Y	FBgn0032945	35407	CG8665	CG8665
FBgn0033297	Y	N	Y	Y N Y	FBgn0033297	35830	Mal-A8	Maltase A8
FBgn0033374	Y	N	Y	Y N Y	FBgn0033374	35919	CG13741	uncharacterized protein
FBgn0033760	Y	N	Y	Y N Y	FBgn0033760	36391	CG8785	CG8785
FBgn0033915	Y	N	Y	Y N Y	FBgn0033915	36579	CG8485	CG8485
FBgn0034262	Y	N	Y	Y N Y	FBgn0034262	37010	swi2	swi2
FBgn0035343	Y	N	Y	Y N Y	FBgn0035343	38310	CG16762	uncharacterized protein
FBgn0035667	N	N	Y	N N Y	FBgn0035667	38685	Jon65Ai	Jonah 65Ai
FBgn0035696	Y	N	Y	Y N Y	FBgn0035696	38727	Best2	Bestrophin 2
FBgn0037899	Y	N	Y	Y N Y	FBgn0037899	41372	RpL24-like	Ribosomal protein L24-like
FBgn0038432	Y	N	Y	Y N Y	FBgn0038432	41997	CG14883	uncharacterized protein
FBgn0038462	Y	N	Y	Y N Y	FBgn0038462	42046	CG17556	uncharacterized protein
FBgn0038914	Y	N	Y	Y N Y	FBgn0038914	42578	fit	female-specific independent of transformer
FBgn0039685	Y	N	Y	Y N Y	FBgn0039685	43497	Obp99b	Odorant-binding protein 99b
FBgn0039777	Y	N	Y	Y N Y	FBgn0039777	43621	Jon99Fii	Jonah 99Fii
FBgn0039873	Y	N	Y	Y N Y	FBgn0039873	43744	Smvt	Sodium-dependent multivitamin transporter
FBgn0039932	N	N	Y	N N Y	FBgn0039932	43835	fuss	fussel
FBgn0050438	Y	N	Y	Y N Y	FBgn0050438	246614	CG30438	uncharacterized protein
FBgn0051146	Y	N	Y	Y N Y	FBgn0051146	40913	Nlg1	Neuroligin 1
FBgn0051233	Y	N	Y	Y N Y	FBgn0051233	42557	CG31233	uncharacterized protein
FBgn0051812	Y	N	Y	Y N Y	FBgn0051812	318956	CG31812	uncharacterized protein
FBgn0052816	Y	N	Y	Y N Y	FBgn0052816	318225	CG32816	uncharacterized protein
FBgn0058191	Y	N	Y	Y N Y	FBgn0058191	3354930	CG40191	uncharacterized protein
FBgn0063499	Y	N	Y	Y N Y	FBgn0063499	37105	GstE10	Glutathione S transferase E10
FBgn0086365	Y	N	Y	Y N Y	FBgn0086365	42890	Orct2	Organic cation transporter 2
FBgn0260243	Y	N	Y	Y N Y	FBgn0260243	41073	E(var)3-9	Enhancer of variegation 3-9
FBgn0260747	Y	N	Y	Y N Y	FBgn0260747	32701	CG5010	CG5010
FBgn0262357	Y	N	Y	Y N Y	FBgn0262357	12798556	CG43055	uncharacterized protein
FBgn0264087	Y	N	Y	Y N Y	FBgn0264087	34038	Slob	Slowpoke binding protein
FBgn0265623	Y	N	Y	Y N Y	FBgn0265623	36432	Su(z)2	Suppressor of zeste 2
FBgn0268063	Y	N	Y	Y N Y	FBgn0268063	38845	ltl	larval translucida

## Sheet: D+DxS
gene	S	D	SxD	combo	FLYBASE	ENTREZ	SYMBOL	GENENAME
FBgn0000565	Y	Y	Y	Y Y Y	FBgn0000565	39675	Eip71CD	Ecdysone-induced protein 28/29kD
FBgn0001142	Y	Y	Y	Y Y Y	FBgn0001142	33172	Gs1	Glutamine synthetase 1
FBgn0001187	Y	Y	Y	Y Y Y	FBgn0001187	44008	Hex-C	Hexokinase C
FBgn0001216	Y	Y	Y	Y Y Y	FBgn0001216	39542	Hsc70-1	Heat shock protein cognate 1
FBgn0002569	Y	Y	Y	Y Y Y	FBgn0002569	35825	Mal-A2	Maltase A2
FBgn0002570	Y	Y	Y	Y Y Y	FBgn0002570	35824	Mal-A1	Maltase A1
FBgn0002938	Y	Y	Y	Y Y Y	FBgn0002938	34012	ninaC	neither inactivation nor afterpotential C
FBgn0003250	Y	Y	Y	Y Y Y	FBgn0003250	39887	Rh4	Rhodopsin 4
FBgn0003356	Y	Y	Y	Y Y Y	FBgn0003356	43544	Jon99Cii	Jonah 99Cii
FBgn0003357	Y	Y	Y	Y Y Y	FBgn0003357	43543	Jon99Ciii	Jonah 99Ciii
FBgn0004623	Y	Y	Y	Y Y Y	FBgn0004623	40148	Gbeta76C	G protein beta-subunit 76C
FBgn0004784	Y	Y	Y	Y Y Y	FBgn0004784	36897	inaC	inactivation no afterpotential C
FBgn0005614	Y	Y	Y	Y Y Y	FBgn0005614	36003	trpl	transient receptor potential-like
FBgn0010038	Y	Y	Y	Y Y Y	FBgn0010038	48335	GstD2	Glutathione S transferase D2
FBgn0010041	Y	Y	Y	Y Y Y	FBgn0010041	48338	GstD5	Glutathione S transferase D5
FBgn0010044	Y	Y	Y	Y Y Y	FBgn0010044	48341	GstD8	Glutathione S transferase D8
FBgn0010222	Y	Y	Y	Y Y Y	FBgn0010222	47895	Nmdmc	NAD-dependent methylenetetrahydrofolate dehydrogenase
FBgn0011555	Y	Y	Y	Y Y Y	FBgn0011555	36218	thetaTry	thetaTrypsin	uncharacterized protein
FBgn0014455	Y	Y	Y	Y Y Y	FBgn0014455	32471	Ahcy	Adenosylhomocysteinase
FBgn0022355	Y	Y	Y	Y Y Y	FBgn0022355	32821	Tsf1	Transferrin 1
FBgn0024289	Y	Y	Y	Y Y Y	FBgn0024289	40836	Sodh-1	Sorbitol dehydrogenase 1
FBgn0025595	Y	Y	Y	Y Y Y	FBgn0025595	33942	AkhR	Adipokinetic hormone receptor
FBgn0028583	Y	Y	Y	Y Y Y	FBgn0028583	33120	lcs	la costa
FBgn0028950	Y	Y	Y	Y Y Y	FBgn0028950	34913	CG15255	uncharacterized protein
FBgn0029762	Y	Y	Y	Y Y Y	FBgn0029762	31457	NAAT1	Nutrient Amino Acid Transporter 1
FBgn0029924	Y	Y	Y	Y Y Y	FBgn0029924	31641	CG4586	CG4586	target of brain insulin
FBgn0030148	Y	Y	Y	Y Y Y	FBgn0030148	31909	CG3106	CG3106
FBgn0030615	Y	Y	Y	Y Y Y	FBgn0030615	32444	Cyp4s3	Cyp4s3	lambdaTry
FBgn0031249	Y	Y	Y	Y Y Y	FBgn0031249	33206	CG11911	uncharacterized protein
FBgn0031251	Y	Y	Y	Y Y Y	FBgn0031251	33209	CG4213	CG4213
FBgn0031298	Y	Y	Y	Y Y Y	FBgn0031298	33283	Atg4a	Autophagy-related 4a
FBgn0031418	Y	Y	Y	Y Y Y	FBgn0031418	33421	CG3609	CG3609
FBgn0031432	Y	Y	Y	Y Y Y	FBgn0031432	33438	Cyp309a1	Cyp309a1
FBgn0031460	Y	Y	Y	Y Y Y	FBgn0031460	33472	CG15399	uncharacterized protein
FBgn0031461	Y	Y	Y	Y Y Y	FBgn0031461	33474	daw	dawdle
FBgn0031514	Y	Y	Y	Y Y Y	FBgn0031514	33539	CG3332	CG3332
FBgn0031929	Y	Y	Y	Y Y Y	FBgn0031929	34041	CG18585	uncharacterized protein
FBgn0031930	Y	Y	Y	Y Y Y	FBgn0031930	34042	CG7025	CG7025
FBgn0032066	Y	Y	Y	Y Y Y	FBgn0032066	34203	LManIII	Lysosomal alpha-mannosidase III
FBgn0032076	Y	Y	Y	Y Y Y	FBgn0032076	3771738	CG9510	CG9510
FBgn0032144	N	Y	Y	N Y Y	FBgn0032144	34297	CG17633	uncharacterized protein
FBgn0032652	Y	Y	Y	Y Y Y	FBgn0032652	35067	CG6870	CG6870
FBgn0032706	Y	Y	Y	Y Y Y	FBgn0032706	35131	Irk3	Inwardly rectifying potassium channel 3
FBgn0032726	Y	Y	Y	Y Y Y	FBgn0032726	35152	CG10621	uncharacterized protein
FBgn0033048	Y	Y	Y	Y Y Y	FBgn0033048	35521	CG7881	CG7881
FBgn0033268	Y	Y	Y	Y Y Y	FBgn0033268	35789	Obp44a	Odorant-binding protein 44a
FBgn0033294	Y	Y	Y	Y Y Y	FBgn0033294	35827	Mal-A4	Maltase A4
FBgn0033296	Y	Y	Y	Y Y Y	FBgn0033296	35829	Mal-A7	Maltase A7
FBgn0033782	Y	Y	Y	Y Y Y	FBgn0033782	36424	sug	sugarbabe
FBgn0033913	Y	Y	Y	Y Y Y	FBgn0033913	36577	CG8468	CG8468
FBgn0033980	Y	Y	Y	Y Y Y	FBgn0033980	36664	Cyp6a20	Cyp6a20
FBgn0034045	Y	Y	Y	Y Y Y	FBgn0034045	36742	CG8249	CG8249
FBgn0034497	Y	Y	Y	Y Y Y	FBgn0034497	37297	CG9090	CG9090
FBgn0034511	Y	Y	Y	Y Y Y	FBgn0034511	37313	GNBP-like3	GNBP-like 3
FBgn0034515	Y	Y	Y	Y Y Y	FBgn0034515	37317	CG13428	uncharacterized protein
FBgn0034638	Y	Y	Y	Y Y Y	FBgn0034638	37458	CG10433	uncharacterized protein
FBgn0034808	Y	Y	Y	Y Y Y	FBgn0034808	37652	CG9896	CG9896
FBgn0035154	Y	Y	Y	Y Y Y	FBgn0035154	38083	CG3344	CG3344
FBgn0035348	Y	Y	Y	Y Y Y	FBgn0035348	38315	CG16758	uncharacterized protein
FBgn0035476	Y	Y	Y	Y Y Y	FBgn0035476	38462	CG12766	uncharacterized protein
FBgn0035484	Y	Y	Y	Y Y Y	FBgn0035484	38473	CG11594	uncharacterized protein
FBgn0035665	Y	Y	Y	Y Y Y	FBgn0035665	38683	Jon65Aiii	Jonah 65Aiii
FBgn0035666	Y	Y	Y	Y Y Y	FBgn0035666	38684	Jon65Aii	Jonah 65Aii
FBgn0035670	Y	Y	Y	Y Y Y	FBgn0035670	38688	CG10472	uncharacterized protein
FBgn0036422	Y	Y	Y	Y Y Y	FBgn0036422	39580	CG3868	CG3868
FBgn0036547	Y	Y	Y	Y Y Y	FBgn0036547	39736	CG17032	uncharacterized protein
FBgn0036549	Y	Y	Y	Y Y Y	FBgn0036549	39738	CG10516	uncharacterized protein
FBgn0036875	Y	Y	Y	Y Y Y	FBgn0036875	40117	CG9449	CG9449
FBgn0036876	Y	Y	Y	Y Y Y	FBgn0036876	40118	CG9451	CG9451
FBgn0037167	Y	Y	Y	Y Y Y	FBgn0037167	40472	CG11425	uncharacterized protein
FBgn0037292	Y	Y	Y	Y Y Y	FBgn0037292	40615	plh	pasang lhamu	Cyp4s3
FBgn0037405	N	Y	Y	N Y Y	FBgn0037405	40751	CG1077	CG1077
FBgn0037520	Y	Y	Y	Y Y Y	FBgn0037520	40923	CG18268	uncharacterized protein
FBgn0037782	Y	Y	Y	Y Y Y	FBgn0037782	41232	Npc2d	Niemann-Pick type C-2d
FBgn0037974	Y	Y	Y	Y Y Y	FBgn0037974	41453	CG12224	uncharacterized protein
FBgn0038063	Y	Y	Y	Y Y Y	FBgn0038063	41549	Octbeta2R	Octopamine beta2 receptor
FBgn0038257	Y	Y	Y	Y Y Y	FBgn0038257	41786	smp-30	Senescence marker protein-30
FBgn0038412	N	Y	Y	N Y Y	FBgn0038412	41975	Zip89B	Zinc/iron regulat
FBgn0038658	Y	Y	Y	Y Y Y	FBgn0038658	42264	CG14292	uncharacterized protein
FBgn0038702	Y	Y	Y	Y Y Y	FBgn0038702	42320	CG3739	CG3739
FBgn0038719	Y	Y	Y	Y Y Y	FBgn0038719	42338	CG16727	uncharacterized protein
FBgn0038740	Y	Y	Y	Y Y Y	FBgn0038740	42362	CG4562	CG4562
FBgn0038845	Y	Y	Y	Y Y Y	FBgn0038845	42482	CG10827	uncharacterized protein
FBgn0038865	Y	Y	Y	Y Y Y	FBgn0038865	42512	cDIP	Common Dpr-interacting protein
FBgn0038916	Y	Y	Y	Y Y Y	FBgn0038916	42580	dnd	dead end
FBgn0039064	Y	Y	Y	Y Y Y	FBgn0039064	42747	CG4467	CG4467
FBgn0039094	Y	Y	Y	Y Y Y	FBgn0039094	42783	CG10184	uncharacterized protein
FBgn0039152	Y	Y	Y	Y Y Y	FBgn0039152	42860	Root	Rootletin
FBgn0039203	Y	Y	Y	Y Y Y	FBgn0039203	42924	CG13618	uncharacterized protein
FBgn0039232	Y	Y	Y	Y Y Y	FBgn0039232	42961	sosie	sosie
FBgn0039472	Y	Y	Y	Y Y Y	FBgn0039472	43248	CG17192	uncharacterized protein
FBgn0039474	Y	Y	Y	Y Y Y	FBgn0039474	43250	CG6283	CG6283
FBgn0039678	N	Y	Y	N Y Y	FBgn0039678	43488	Obp99a	Odorant-binding protein 99a
FBgn0039760	Y	Y	Y	Y Y Y	FBgn0039760	43602	CG9682	CG9682
FBgn0039769	Y	Y	Y	Y Y Y	FBgn0039769	43613	CG15534	uncharacterized protein
FBgn0039817	Y	Y	Y	Y Y Y	FBgn0039817	43677	CG15553	uncharacterized protein
FBgn0040060	Y	Y	Y	Y Y Y	FBgn0040060	38680	yip7	yippee interacting protein 7
FBgn0040349	Y	Y	Y	Y Y Y	FBgn0040349	31046	CG3699	CG3699
FBgn0040959	Y	Y	Y	Y Y Y	FBgn0040959	50433	Peritrophin-15a	Peritrophin-15a
FBgn0041337	Y	Y	Y	Y Y Y	FBgn0041337	33439	Cyp309a2	Cyp309a2
FBgn0043470	Y	Y	Y	Y Y Y	FBgn0043470	36214	lambdaTry	lambdaTry	thetaTrypsin
FBgn0043783	Y	Y	Y	Y Y Y	FBgn0043783	40406	CG32444	uncharacterized protein
FBgn0051343	Y	Y	Y	Y Y Y	FBgn0051343	326133	CG31343	uncharacterized protein
FBgn0051781	Y	Y	Y	Y Y Y	FBgn0051781	12798248	CR31781	ncRNA
FBgn0053511	Y	Y	Y	Y Y Y	FBgn0053511	3346223	CG33511	uncharacterized protein
FBgn0054040	Y	Y	Y	Y Y Y	FBgn0054040	3885655	CG34040	uncharacterized protein
FBgn0063497	Y	Y	Y	Y Y Y	FBgn0063497	37108	GstE3	Glutathione S transferase E3
FBgn0085359	Y	Y	Y	Y Y Y	FBgn0085359	2768869	CG34330	uncharacterized protein
FBgn0250757	Y	Y	Y	Y Y Y	FBgn0250757	43136	CG42235	uncharacterized protein
FBgn0250815	Y	Y	Y	Y Y Y	FBgn0250815	38682	Jon65Aiv	Jonah 65Aiv
FBgn0259101	Y	Y	Y	Y Y Y	FBgn0259101	32043	CG42249	uncharacterized protein
FBgn0261575	Y	Y	Y	Y Y Y	FBgn0261575	43072	tobi	target of brain insulin	pasang lhamu
FBgn0261714	Y	Y	Y	Y Y Y	FBgn0261714	41474	Cpn	Calphotin
FBgn0262003	Y	Y	Y	Y Y Y	FBgn0262003	3885579	CG42821	uncharacterized protein
FBgn0262636	Y	Y	Y	Y Y Y	FBgn0262636	43789	dati	datilografo
FBgn0267486	Y	Y	Y	Y Y Y	FBgn0267486	35091	Ptp36E	Protein tyrosine phosphatase 36E

## Sheet: male-specific
FLYBASE	ENTREZID	SYMBOL	GENENAME	logFC	logCPM	F	PValue	FDR	dir
FBgn0259951	8673984	Sfp24Ba	Seminal fluid protein 24Ba	-0.854429	5.17167	117.518	3.2251e-09	6.05996e-06	D
FBgn0032265	34451	CG18301	uncharacterized protein	-0.62317	4.55361	62.859	3.07005e-08	2.88432e-05	D
FBgn0259969	8674009	Sfp65A	Seminal fluid protein 65A	-0.419038	4.88883	34.8781	2.69211e-06	0.00168616	D
FBgn0037038	40317	CG11037	uncharacterized protein	-0.381462	5.42599	33.3531	3.62307e-06	0.00170194	D
FBgn0040107	53552	lectin-21Ca	lectin-21Ca	-0.581837	2.89729	30.3542	7.3926e-06	0.00231762	D
FBgn0038069	41556	CG11608	uncharacterized protein	-0.530495	3.51794	30.0189	8.45096e-06	0.00231762	D
FBgn0030105	31862	CG15369	uncharacterized protein	-2.84988	-0.235039	41.3466	8.63402e-06	0.00231762	D
FBgn0261054	8673990	Sfp24Bc	Seminal fluid protein 24Bc	-0.853141	1.76554	27.8349	1.3878e-05	0.00290847	D
FBgn0051779	318936	Acp24A4	Accessory gland protein 24A4	-0.747997	5.84745	61.1872	1.39309e-05	0.00290847	D
FBgn0035216	38163	CG9168	CG9168	-0.607557	2.5163	27.2592	1.60947e-05	0.00302419	D
FBgn0052382	38833	sphinx2	sphinx2	-0.486101	3.1664	26.3109	2.06196e-05	0.00352221	D
FBgn0037650	41076	CG11977	uncharacterized protein	-0.58234	2.67824	25.623	2.47512e-05	0.00387562	D
FBgn0038918	42582	CG6690	CG6690	-0.376974	4.6181	24.2264	4.70641e-05	0.00665511	D
FBgn0040097	53541	lectin-30A	lectin-30A	-0.361094	5.49002	25.4121	5.25328e-05	0.00665511	D
FBgn0053502	2768875	CG33502	uncharacterized protein	-7.59944	-1.01342	35.0901	5.31276e-05	0.00665511	D
FBgn0002856	33816	Acp26Ab	Accessory gland protein 26Ab	-0.303005	5.33449	21.0233	8.99533e-05	0.0105639	D
FBgn0085476	5740813	CG34447	uncharacterized protein	-0.635529	2.24333	20.8086	9.58416e-05	0.0105933	D
FBgn0263082	12798309	CG43350	uncharacterized protein	-0.521958	2.675	20.2642	0.00011272	0.0115737	D
FBgn0032853	35303	CG10651	uncharacterized protein	-0.639387	2.37615	20.8891	0.000117031	0.0115737	D
FBgn0266766	19835623	CR45231	ncRNA	-0.417203	3.56324	19.6817	0.000137848	0.012914	D
FBgn0265445	19835748	CR44345	ncRNA	-1.52144	-0.274617	19.5299	0.000144329	0.012914	D
FBgn0043539	246672	Obp22a	Odorant-binding protein 22a	-0.451034	3.05919	17.777	0.000248367	0.0212128	D
FBgn0262359	12798305	CG43057	uncharacterized protein	-0.496335	2.93019	18.1533	0.00029153	0.0238167	D
FBgn0259958	8674016	Sfp24F	Seminal fluid protein 24F	-0.56822	3.88956	24.4516	0.000342014	0.0267769	D
FBgn0051413	318720	CG31413	uncharacterized protein	-0.39525	3.29761	16.1614	0.000410333	0.0286315	D
FBgn0264373	14462781	CR43825	ncRNA	-1.14632	0.0500558	16.0955	0.000419394	0.0286315	D
FBgn0259972	8674043	Sfp77F	Seminal fluid protein 77F	-0.32462	4.25389	16.1279	0.000423044	0.0286315	D
FBgn0039598	43396	aqrs	aquarius	-0.263219	5.60977	16.1021	0.000426654	0.0286315	D
FBgn0015584	36874	Acp53Ea	Accessory gland protein 53Ea	-0.437807	7.14861	23.4467	0.000453425	0.0293788	D
FBgn0264566	14462900	CG43938	uncharacterized protein	-1.11991	-0.0519482	14.8637	0.000635312	0.0397917	D
FBgn0043533	246668	Obp56f	Odorant-binding protein 56f	-0.454111	4.41494	20.372	0.000704594	0.0427075	D
FBgn0083966	4379866	CG34130	uncharacterized protein	-0.371766	3.2232	14.3851	0.000749346	0.0437009	D
FBgn0265694	19835429	CR44501	ncRNA	-0.954633	0.274605	14.3117	0.000768722	0.0437009	D
FBgn0051017	326114	PH4alphaNE3	prolyl-4-hydroxylase-alpha NE3	-0.292071	4.22159	14.2305	0.000790755	0.0437009	D

## Sheet: female-specific
FLYBASE	ENTREZID	SYMBOL	GENENAME	logFC	logCPM	F	PValue	FDR	dir
FBgn0000360	31788	Cp38	Chorion protein 38	2.24068	7.48061	54.8659	0.000107121	0.00980505	U
FBgn0044046	31328	Ilp7	Insulin-like peptide 7	2.22018	1.20237	53.1803	0.000118849	0.00980505	U
FBgn0032311	34506	CG12517	uncharacterized protein	2.17669	1.04237	45.7378	0.000195332	0.0107433	U
FBgn0000359	31787	Cp36	Chorion protein 36	2.08118	7.207	40.0509	0.00030026	0.0123857	U
FBgn0267505	26067173	pre-rRNA:CR45845	ribosomal RNA primary transcript:CR45845	2.3069	-0.256353	29.9212	0.000750111	0.0218876	U
FBgn0003486	38631	spo	spook	1.88142	1.84255	29.3474	0.000795912	0.0218876	U
FBgn0051681	318882	CG31681	uncharacterized protein	1.3771	3.73745	23.9364	0.00146616	0.0245028	U
FBgn0029568	31067	CG11381	uncharacterized protein	-2.0802	3.72837	22.7618	0.00169838	0.0245028	D
FBgn0030438	32247	CG15721	uncharacterized protein	1.77344	4.65033	21.791	0.00192656	0.0245028	U
FBgn0264439	14462718	CR43857	ncRNA	1.53664	0.518767	20.7579	0.00221394	0.0245028	U
FBgn0031031	32949	CG14218	uncharacterized protein	2.16836	-0.475549	20.4586	0.00230723	0.0245028	U
FBgn0030373	32176	CG12721	uncharacterized protein	1.36487	3.03624	20.441	0.00231287	0.0245028	U
FBgn0035641	38658	CG5568	CG5568	1.30649	5.69169	20.3295	0.002349	0.0245028	U
FBgn0058182	10178842	CR40182	pseudo	1.32469	1.27777	20.0779	0.00243324	0.0245028	U
FBgn0264942	14462389	CR44111	ncRNA	1.34303	1.33092	19.4264	0.00266989	0.0245028	U
FBgn0052834	318238	CG32834	uncharacterized protein	1.27752	2.8631	19.2439	0.00274137	0.0245028	U
FBgn0051661	33330	CG31661	uncharacterized protein	1.6114	3.05972	19.1118	0.00279461	0.0245028	U
FBgn0267511	26067179	28SrRNA-Psi:CR45851	28S ribosomal RNA pseudogene:CR45851	1.97537	0.843106	18.9836	0.00284758	0.0245028	U
FBgn0265316	19835819	CR44289	ncRNA	2.14177	-0.00181517	18.8364	0.00290996	0.0245028	U
FBgn0031406	33407	Send1	Spermathecal endopeptidase 1	1.29511	3.25119	18.5738	0.00302564	0.0245028	U
FBgn0035642	38659	CG18586	uncharacterized protein	1.27576	4.62687	18.3413	0.00313292	0.0245028	U
FBgn0264747	5740769	CG44005	uncharacterized protein	1.31604	5.18106	17.8636	0.00336907	0.0245028	U
FBgn0052602	32384	Muc12Ea	Mucin 12Ea	1.38054	4.68219	17.6467	0.00348375	0.0245028	U
FBgn0042186	59224	CG17239	uncharacterized protein	1.27918	2.11065	17.2796	0.0036894	0.0245028	U
FBgn0261615	10178820	CG42704	uncharacterized protein	0.886255	5.20126	17.0539	0.00382353	0.0245028	U
FBgn0051262	318649	CG31262	uncharacterized protein	1.30638	4.33186	16.3593	0.00427714	0.0245028	U
FBgn0036938	40199	CG14187	uncharacterized protein	-3.34146	0.515558	16.9696	0.00430445	0.0245028	D
FBgn0030931	32837	Xrcc2	X-ray repair cross complementing 2	1.31429	1.81098	16.263	0.00434535	0.0245028	U
FBgn0003482	318579	spn-D	spindle D	1.20075	1.5289	16.217	0.00437841	0.0245028	U
FBgn0050343	246551	CG30343	uncharacterized protein	1.99014	-0.343067	16.0358	0.00451174	0.0245028	U
FBgn0029172	44006	Fad2	Fad2	1.15269	5.3513	15.915	0.00460356	0.0245028	U
FBgn0030551	32374	CG11674	uncharacterized protein	1.07367	5.47641	15.6046	0.00485056	0.0250107	U
FBgn0035697	38728	CG10163	uncharacterized protein	-3.0088	1.08852	15.9035	0.00534808	0.0261335	D
FBgn0030666	32502	CG12708	uncharacterized protein	1.21612	1.64486	14.9968	0.00538509	0.0261335	U
FBgn0040367	31069	CG11382	uncharacterized protein	1.37982	0.871121	14.6736	0.00569988	0.0268709	U
FBgn0267508	26067176	28SrRNA-Psi:CR45848	28S ribosomal RNA pseudogene:CR45848	1.76122	0.886027	14.5068	0.00587163	0.0269116	U
FBgn0030938	32845	CG15047	uncharacterized protein	1.16073	3.2634	14.1888	0.00621746	0.0277265	U
FBgn0029696	31365	CG15571	uncharacterized protein	-1.74966	1.20181	13.5812	0.00695378	0.0299615	D
FBgn0262536	12798122	CG43090	uncharacterized protein	0.973524	4.82801	13.3973	0.00719837	0.0299615	U
FBgn0262900	12797953	CG43255	uncharacterized protein	1.11409	2.08963	13.1911	0.00748559	0.0299615	U
FBgn0032303	34493	CG6508	CG6508	0.990929	1.56599	13.0668	0.00766593	0.0299615	U
FBgn0038469	42054	CG4009	CG4009	-2.27123	4.22531	13.512	0.00773905	0.0299615	D
FBgn0035312	38277	CG15820	uncharacterized protein	1.05567	3.62858	12.9586	0.00782743	0.0299615	U
FBgn0267320	19835246	CR45756	ncRNA	1.2331	1.14149	12.8526	0.00798972	0.0299615	U
FBgn0041721	3772091	snRNA:U12:73B	ncRNA	1.4474	0.169626	12.3553	0.00881159	0.0323092	U
FBgn0024984	31196	CG3457	CG3457	1.09606	4.41507	12.1477	0.00918652	0.0329517	U
FBgn0267009	19835354	CR45453	ncRNA	2.42168	-1.15398	11.823	0.00981438	0.0344547	U
FBgn0036977	40243	CG5665	CG5665	1.59038	-0.193196	11.6123	0.0102515	0.0352396	U
FBgn0003980	33827	Vm26Ab	Vitelline membrane 26Ab	0.661387	6.12613	11.4619	0.0105786	0.0356217	U
FBgn0053470	2768831	CG33470	uncharacterized protein	5.57494	-1.27433	11.1323	0.0113435	0.0374335	U
FBgn0266319	19835330	CR44984	ncRNA	1.38828	-0.210099	10.9061	0.0119096	0.0385312	U
FBgn0266699	19836184	CR45189	ncRNA	1.34615	0.469802	10.7811	0.0122379	0.0388316	U
FBgn0261640	10178788	CR42723	pseudo	4.83332	-0.00884353	11.2611	0.0129432	0.040295	U
FBgn0261848	10178796	CG42780	uncharacterized protein	1.01158	1.74835	10.162	0.0140455	0.0429169	U
FBgn0032126	34271	CG13113	uncharacterized protein	-1.33066	1.17248	9.66931	0.0157338	0.0470268	D
FBgn0262112	43512	sro	shroud	1.20038	0.442097	9.60826	0.0159606	0.0470268	U
