# Supplementary material for: Sex-specific transcriptomic responses to changes in the nutritional environment
Source: eLife. 2019 Aug 22;8:e47262. doi: 10.7554/eLife.47262 (PMC6773443; doi:10.7554/eLife.47262)
Supplement: Supplementary file 3. — For each gene category of genes, we searced for enriched transcription factor motifs. This was done by surveying 5 kb upstream of every gene for enriched motifs. [file elife-47262-supp3.xlsx]

## Sheet: D
geneSet	motif	NES	AUC	TF_highConf	TF_lowConf	nEnrGenes	rankAtMax	enrichedGenes
geneListName	jaspar__MA1069.1	5.34	0.0779		Atf-2; Atf3; Atf6; CG44247; CrebA; CrebB; Jra; crc; kay (inferredBy_MotifSimilarity).Xbp1 (inferredBy_MotifSimilarity_n_Orthology).	62	461	Ace;Ank2;Argk;bab2;boss;by;CAP;cbt;CG10311;CG10659;CG10737;CG10960;CG1136;CG12290;CG14989;CG30281;CG31140;CG31547;CG34398;CG42540;CG42784;CG42808;CG43729;CG43778;CG44085;CG5023;CG5065;CG5639;CG6767;CG8740;CG9331;cpo;DOR;dpr12;Dscam2;Ect4;Eip75B;Flo2;fru;Gad1;Gale;Gk2;GLS;Hr38;IA-2;jp;mbl;Mf;Mob2;nAChRalpha1;Nplp1;Pax;Prat2;Rim;Shab;side;sNPF;Syn;tn;wupA;Zasp52;zormin
geneListName	cisbp__M0265	5.31	0.0777		Atf-2; Atf3; Atf6; CG44247; CrebA; CrebB; Jra; crc; kay (inferredBy_MotifSimilarity).Xbp1 (inferredBy_MotifSimilarity_n_Orthology).	62	460	Ace;Ank2;Argk;bab2;boss;by;CAP;cbt;CG10311;CG10659;CG10737;CG10960;CG1136;CG12290;CG14989;CG30281;CG31140;CG31547;CG34398;CG42540;CG42784;CG42808;CG43729;CG43778;CG44085;CG5023;CG5065;CG5639;CG6767;CG8740;CG9331;cpo;DOR;dpr12;Dscam2;Ect4;Eip75B;Flo2;fru;Gad1;Gale;Gk2;GLS;Hr38;IA-2;jp;mbl;Mf;Mob2;nAChRalpha1;Nplp1;Pax;Prat2;Rim;Shab;side;sNPF;Syn;tn;wupA;Zasp52;zormin
geneListName	cisbp__M3083	4.94	0.0751	CrebB (inferredBy_Orthology).	Atf3; REPTOR-BP (inferredBy_MotifSimilarity).Atf6; tj (inferredBy_MotifSimilarity_n_Orthology).	50	364	Ace;Argk;bab2;boss;by;CAP;cbt;CG10311;CG10659;CG10737;CG10960;CG1136;CG12290;CG14989;CG30281;CG31140;CG34398;CG3902;CG42784;CG43729;CG43778;CG44085;CG5023;CG5065;CG5639;CG6767;CG8740;CG9331;DOR;dpr12;Dscam2;Ect4;Eip75B;Flo2;fru;Gad1;GLS;Hr38;IA-2;jp;Mf;Mob2;Pax;Prat2;sNPF;Syn;tn;wupA;Zasp52;zormin
geneListName	flyfactorsurvey__lola_SOLEXA_5_FBgn0005630	4.87	0.0746	lola (directAnnotation).		278	3971	7B2;aay;Ac3;AcCoAS;Ace;Act57B;Act88F;Adck;ade2;ade3;AdSL;Aldh;alpha-Est9;Ank2;Appl;arg;Argk;Arr2;Atg18b;bab2;beat-IIIb;boss;btsz;by;Cad74A;CadN;caix;CanA1;CAP;CBP;Cbp53E;CG10283;CG10311;CG10359;CG10559;CG10562;CG10659;CG10737;CG1090;CG10947;CG10960;CG11147;CG1136;CG11658;CG11739;CG11892;CG11912;CG12290;CG12512;CG12950;CG13124;CG13659;CG13905;CG14234;CG14820;CG14964;CG14989;CG1532;CG15531;CG15765;…
geneListName	cisbp__M5096	4.86	0.0746		lola (inferredBy_MotifSimilarity).	274	3911	7B2;aay;Ac3;AcCoAS;Ace;Act57B;Act88F;Adck;ade2;ade3;AdSL;Aldh;alpha-Est9;Ank2;Appl;arg;Argk;Arr2;bab2;beat-IIIb;boss;btsz;by;Cad74A;CadN;caix;CanA1;CAP;CBP;Cbp53E;CG10311;CG10359;CG10559;CG10562;CG10659;CG10737;CG1090;CG10947;CG10960;CG11147;CG1136;CG11658;CG11739;CG11892;CG11912;CG12290;CG12512;CG12950;CG13124;CG13659;CG13905;CG14234;CG14820;CG14964;CG14989;CG1532;CG15531;CG15765;CG16820;CG17027…
geneListName	transfac_public__M00039	4.84	0.0745	CrebB (inferredBy_Orthology).	Atf3; REPTOR-BP (inferredBy_MotifSimilarity).Atf6; tj (inferredBy_MotifSimilarity_n_Orthology).	50	378	Ace;Argk;bab2;boss;by;CAP;cbt;CG10311;CG10659;CG10737;CG10960;CG1136;CG12290;CG14989;CG30281;CG31140;CG34398;CG3902;CG42784;CG43729;CG43778;CG44085;CG5023;CG5065;CG5639;CG6767;CG8740;CG9331;DOR;dpr12;Dscam2;Ect4;Eip75B;Flo2;fru;Gad1;GLS;Hr38;IA-2;jp;Mf;Mob2;Pax;Prat2;sNPF;Syn;tn;wupA;Zasp52;zormin
geneListName	cisbp__M1544	4.83	0.0744			70	588	Ace;Argk;boss;by;CAP;cbt;CG10311;CG10512;CG10659;CG10737;CG10960;CG1136;CG11409;CG12290;CG14989;CG30281;CG31140;CG34398;CG3902;CG42540;CG42784;CG43078;CG4341;CG43729;CG43778;CG44085;CG45002;CG5023;CG5065;CG5639;CG6084;CG6767;CG6910;CG8740;CG9331;CG9990;comm3;cpo;DOR;dpr12;Dscam2;Ect4;Eip75B;Flo2;Fmo-2;fru;Gad1;Gale;Gk2;GLS;Got2;Hr38;IA-2;mbl;Mf;Mob2;nAChRalpha1;Pax;Prat2;Rim;Sema2b;Shab;side;sNPF…
geneListName	transfac_pro__M02897	4.82	0.0744	Optix (inferredBy_Orthology).		48	309	Appl;arg;Argk;bab2;CAP;CG14989;CG1695;CG31140;CG3556;CG42540;CG42784;CG4301;CG43102;CG43897;CG44085;CG45002;CG45076;CG45078;CG5800;CG7910;Cngl;Dscam2;dsx;FASN2;Fife;fru;Gad1;mbl;Mf;Mhc;Mlc1;Mlc2;Mlp60A;nAChRbeta1;nwk;phu;PIP5K59B;Prm;salr;Shab;Sik2;sli;su(r);Taldo;tn;up;VGlut;wupA
geneListName	cisbp__M0342	4.79	0.0741		Atf3; Atf6; CG44247; CrebA; Jra; crc; kay (inferredBy_MotifSimilarity).CrebB; Xbp1 (inferredBy_MotifSimilarity_n_Orthology).	61	533	Ace;Argk;bab2;boss;by;CadN;CAP;cbt;CG10311;CG10659;CG10737;CG10960;CG1136;CG14989;CG16965;CG30281;CG31140;CG34398;CG42540;CG42784;CG42808;CG43729;CG43778;CG44085;CG5023;CG5065;CG5639;CG6767;CG8303;CG8740;CG9331;cpo;Dscam2;Eip75B;Flo2;fru;Gad1;Gale;GLS;Got2;Hr38;IA-2;IRSp53;jp;mbl;Mf;Mob2;nAChRalpha1;Nplp1;Prat2;Rim;RpLP0-like;Shab;side;sNPF;Syn;tn;up;wupA;Zasp52;zormin
geneListName	stark__AAAAGCT	4.75	0.0739			130	1467	aay;Ac3;AcCoAS;Ace;Act57B;ade3;alpha-Est9;Argk;ATP8B;beat-IIIb;boss;btsz;Cad74A;CadN;CanA1;CAP;CBP;CG10311;CG10359;CG10559;CG10562;CG10659;CG10960;CG11147;CG11892;CG12512;CG12950;CG13659;CG14820;CG15531;CG16820;CG17027;CG17124;CG17386;CG18135;CG18208;CG2082;CG31140;CG31345;CG31663;CG3376;CG34114;CG34357;CG3902;CG42322;CG42540;CG42541;CG42784;CG43103;CG4335;CG43729;CG43778;CG44008;CG45002;CG45057;…
geneListName	jaspar__MA0018.2	4.74	0.0738	CrebB (inferredBy_Orthology).	Atf3; CrebA; Jra (inferredBy_MotifSimilarity).Atf6; Xbp1 (inferredBy_MotifSimilarity_n_Orthology).	57	458	Ace;Argk;bab2;boss;by;CAP;cbt;CG10311;CG10659;CG10737;CG10960;CG1136;CG12290;CG14989;CG30281;CG3036;CG31140;CG33181;CG34398;CG42784;CG4335;CG43729;CG43778;CG44085;CG5023;CG5065;CG5639;CG6767;CG8740;CG9331;comm3;cpo;DOR;dpr12;Dscam2;Ect4;Eip75B;Flo2;fru;Gad1;GLS;Hr38;IA-2;IRSp53;jp;Mf;Mob2;Nplp1;Prat2;Rim;sNPF;Syn;tn;tutl;wupA;Zasp52;zormin
geneListName	flyfactorsurvey__lola_SANGER_5_FBgn0005630	4.73	0.0737	lola (directAnnotation).		250	3422	7B2;Ac3;AcCoAS;Ace;Act57B;Act88F;ade2;ade3;alpha-Est9;Ank2;Appl;Arc1;arg;Argk;ATP8B;beat-IIIb;boss;btsz;by;Cad74A;CadN;CanA1;CAP;CBP;Cbp53E;CG10283;CG10311;CG10359;CG10559;CG10562;CG10659;CG1090;CG10947;CG10960;CG11147;CG1136;CG11658;CG11739;CG11892;CG11912;CG12290;CG12512;CG12950;CG13124;CG13659;CG13905;CG14234;CG14820;CG14964;CG14989;CG1532;CG15531;CG15765;CG16820;CG16965;CG17027;CG17124;CG1738…
geneListName	flyfactorsurvey__lola-PG_SOLEXA_FBgn0005630	4.69	0.0735	lola (directAnnotation).		118	1132	Ac3;AcCoAS;Ace;Act57B;ade3;alpha-Est9;Argk;bab2;boss;btsz;CadN;CanA1;CAP;CBP;CG10311;CG10559;CG10659;CG10960;CG11147;CG11892;CG12950;CG13659;CG14820;CG15531;CG15765;CG16820;CG17027;CG17124;CG17386;CG18135;CG18547;CG2269;CG31345;CG32694;CG3376;CG34114;CG34357;CG3902;CG42322;CG42540;CG42541;CG42784;CG43103;CG43729;CG43778;CG44008;CG45002;CG45057;CG5167;CG5707;CG5758;CG5973;CG6084;CG6295;CG6426;CG68…
geneListName	transfac_pro__M01862	4.69	0.0734		Atf-2; CG44247; CG6272; CrebA; Jra; crc; kay (inferredBy_MotifSimilarity).CrebB; Xbp1 (inferredBy_MotifSimilarity_n_Orthology).	42	268	Ace;Argk;boss;by;CAP;cbt;CG10659;CG10737;CG10960;CG1136;CG14989;CG30281;CG31140;CG31547;CG34398;CG42784;CG42808;CG43729;CG44085;CG6767;CG8740;CG9331;cpo;DOR;dpr12;Dscam2;Flo2;fru;Gad1;GLS;haf;Hr38;IRSp53;jp;Mf;Mob2;Prat2;Rim;sNPF;wupA;Zasp52;zormin
geneListName	transfac_pro__M00338	4.62	0.0730			41	250	Ace;boss;by;CAP;cbt;CG10311;CG10659;CG10737;CG10960;CG14989;CG30281;CG31140;CG34398;CG42784;CG42808;CG43729;CG44085;CG5639;CG6767;CG8740;cpo;Cyp4e3;DOR;dpr12;Dscam2;Ect4;Eip75B;Flo2;fru;Gad1;GLS;Hr38;IA-2;mbl;Mf;Prat2;Rim;sNPF;Syn;wupA;zormin
geneListName	cisbp__M5095	4.62	0.0730			182	2048	7B2;Ac3;AcCoAS;Ace;Act57B;Act88F;ade2;ade3;alpha-Est9;Ank2;arg;Argk;beat-IIIb;boss;btsz;by;Cad74A;CadN;CanA1;CAP;CBP;CG10311;CG10359;CG10559;CG10562;CG10659;CG10947;CG10960;CG11147;CG11739;CG11892;CG12290;CG12512;CG12950;CG13124;CG13659;CG13905;CG14234;CG14820;CG15531;CG15765;CG16820;CG17027;CG17124;CG17386;CG17571;CG18135;CG18208;CG2082;CG2781;CG31288;CG31345;CG31999;CG32694;CG3376;CG34114;CG343…
geneListName	hocomoco__CREM_HUMAN.H10MO.C	4.54	0.0724	CrebB (inferredBy_Orthology).		57	479	Ace;Argk;bab2;boss;by;CAP;cbt;CG10659;CG10737;CG10960;CG1136;CG11409;CG14989;CG31140;CG34398;CG42540;CG42784;CG42808;CG43729;CG43778;CG44085;CG44153;CG5023;CG6767;CG8740;CG9331;comm3;cpo;DOR;dpr12;Dscam2;Ect4;Eip75B;Flo2;fru;Gad1;Gale;GLS;Hr38;IA-2;IRSp53;jp;mbl;Mf;Mob2;NetB;Nplp1;Prat2;Prm;Rim;Sema2b;Shab;sNPF;Syn;wupA;Zasp66;zormin
geneListName	hocomoco__ATF1_MOUSE.H10MO.B	4.53	0.0724	CrebB (inferredBy_Orthology).	Jra (inferredBy_MotifSimilarity_n_Orthology).	48	342	Ace;Argk;bab2;boss;by;CAP;cbt;CG10311;CG10659;CG10737;CG10960;CG1136;CG12290;CG14989;CG16965;CG30281;CG31140;CG34398;CG42540;CG42784;CG42808;CG43729;CG43778;CG44085;CG5023;CG5639;CG6767;CG8740;cpo;DOR;Dscam2;Eip75B;Flo2;fru;Gad1;GLS;Hr38;IA-2;jp;Mf;Mob2;Prat2;Rim;sNPF;Syn;wupA;Zasp52;zormin
geneListName	cisbp__M6181	4.51	0.0722	CrebB (inferredBy_Orthology).		57	490	Ace;Argk;bab2;boss;by;CAP;cbt;CG10659;CG10737;CG10960;CG1136;CG11409;CG14989;CG31140;CG34398;CG42540;CG42784;CG42808;CG43729;CG43778;CG44085;CG44153;CG5023;CG6767;CG8740;CG9331;comm3;cpo;DOR;dpr12;Dscam2;Ect4;Eip75B;Flo2;fru;Gad1;Gale;GLS;Hr38;jp;mbl;Mf;Mob2;NetB;Nplp1;Prat2;Prm;Rim;Sema2b;Shab;sNPF;Syn;tn;wupA;Zasp52;Zasp66;zormin
geneListName	cisbp__M1973	4.46	0.0719	Hr51 (inferredBy_Orthology).		173	2281	Ac3;AcCoAS;Ace;Act57B;Act88F;ade3;Aldh;alpha-Est9;Ank2;Appl;arg;Argk;bab2;beat-IIIb;boss;btsz;CadN;caix;CanA1;CAP;CBP;Cbp53E;CG10283;CG10311;CG10559;CG10562;CG10659;CG10960;CG11147;CG11892;CG12290;CG12512;CG13659;CG14820;CG14963;CG14964;CG14989;CG1532;CG15765;CG16820;CG17027;CG17571;CG18135;CG18208;CG2269;CG2781;CG31345;CG31522;CG31663;CG31999;CG32694;CG33110;CG34109;CG34114;CG34126;CG34357;CG343…
geneListName	elemento__TGACGTCA	4.43	0.0717		Atf-2; Atf3; Atf6; CG44247; CrebA; CrebB; Jra; crc; kay (inferredBy_MotifSimilarity).Xbp1 (inferredBy_MotifSimilarity_n_Orthology).	44	320	Ace;Argk;bab2;boss;by;CAP;cbt;CG10311;CG10659;CG10737;CG10960;CG1136;CG12290;CG14989;CG30281;CG31140;CG34398;CG43729;CG43778;CG44085;CG5023;CG5639;CG6767;CG8740;comm3;cpo;DOR;Dscam2;Ect4;Eip75B;Flo2;fru;Gad1;Hr38;IA-2;jp;Mf;Mob2;Prat2;sNPF;Syn;tn;Zasp52;zormin
geneListName	cisbp__M6152	4.42	0.0716	CrebB (inferredBy_Orthology).	Jra (inferredBy_MotifSimilarity_n_Orthology).	45	304	Ace;Argk;bab2;boss;by;CAP;cbt;CG10659;CG10737;CG10960;CG1136;CG12290;CG14989;CG30281;CG31140;CG34398;CG42540;CG42784;CG42808;CG43729;CG43778;CG44085;CG5023;CG5639;CG6767;CG8740;cpo;DOR;Dscam2;Flo2;fru;Gad1;GLS;Hr38;IA-2;jp;Mf;Mob2;Prat2;Rim;sNPF;Syn;wupA;Zasp52;zormin
geneListName	cisbp__M4600	4.40	0.0714	grn (inferredBy_Orthology).	CycT; HLH3B; pnr (inferredBy_MotifSimilarity_n_Orthology).	349	4689	aay;Ac3;AcCoAS;Ace;ade2;ade3;ade5;AhcyL2;Aldh;alpha-Est9;Amy-p;Ance;Ank2;Appl;arg;Argk;atk;atl;ATP8B;bab2;Bace;bmm;btsz;by;CadN;caix;CAP;CBP;Cbp53E;cbt;CG10311;CG10477;CG10512;CG10513;CG10514;CG10559;CG10562;CG10799;CG10947;CG10960;CG11200;CG1136;CG11409;CG11459;CG11739;CG11912;CG1208;CG12116;CG12194;CG12290;CG12374;CG12512;CG13607;CG13905;CG14245;CG14688;CG14820;CG14963;CG14964;CG14989;CG1532;CG…
geneListName	hocomoco__ATF2_HUMAN.H10MO.B	4.39	0.0714		Atf3; Atf6; CrebA; CrebB; REPTOR-BP (inferredBy_MotifSimilarity).Jra (inferredBy_MotifSimilarity_n_Orthology).	58	523	Ace;Ank2;Argk;bab2;boss;by;CAP;cbt;CG10311;CG10659;CG10737;CG10960;CG1136;CG12290;CG14989;CG30281;CG31140;CG34398;CG42540;CG42784;CG42808;CG43729;CG43778;CG44085;CG5023;CG5639;CG6767;CG8740;CG9331;cpo;DOR;dpr12;Dscam2;Ect4;Eip75B;Flo2;fru;Gad1;Gale;GLS;haf;Hr38;IA-2;IRSp53;jp;mbl;Mf;Mob2;Nplp1;Prat2;Rim;Shab;sNPF;Syn;tn;wupA;Zasp52;zormin
geneListName	swissregulon__hs__JUN.p2	4.39	0.0714	Jra (inferredBy_Orthology).	Atf-2; Atf3; Atf6; CG44247; CrebA; CrebB; crc; kay (inferredBy_MotifSimilarity).Xbp1 (inferredBy_MotifSimilarity_n_Orthology).	63	590	Ace;Ank2;Argk;bab2;boss;by;CAP;cbt;CG10311;CG10659;CG10737;CG10960;CG1136;CG12290;CG13124;CG14989;CG1648;CG30281;CG31140;CG34398;CG42540;CG42808;CG43729;CG43778;CG44085;CG45002;CG5023;CG5639;CG6084;CG6767;CG8740;comm3;cpo;Cpr65Au;DOR;dpr12;Dscam2;Ect4;Eip75B;Fife;Flo2;fru;Gad1;Gale;GLS;Got1;Hr38;IA-2;IRSp53;jp;mbl;Mf;Mob2;NetB;Nplp1;Prat2;Rim;side;sNPF;Syn;tn;Zasp52;zormin
geneListName	jaspar__MA0164.1	4.36	0.0712	Hr51 (inferredBy_Orthology).		121	1366	Ac3;AcCoAS;Ace;Act57B;Act88F;alpha-Est9;Ank2;Appl;Argk;beat-IIIb;boss;btsz;CadN;CanA1;CAP;CBP;CG10311;CG10559;CG10659;CG10960;CG11892;CG12290;CG12512;CG13659;CG14820;CG14989;CG16820;CG17027;CG18135;CG18208;CG2269;CG2781;CG31663;CG32694;CG33110;CG34114;CG34126;CG3902;CG40498;CG42492;CG42540;CG42541;CG42784;CG43103;CG43729;CG43778;CG43897;CG44008;CG44153;CG45002;CG45057;CG5065;CG5707;CG5758;CG5973;…
geneListName	cisbp__M0283	4.33	0.0710		Atf-2; Atf3; Atf6; CG44247; CrebA; CrebB; Jra; crc; kay (inferredBy_MotifSimilarity).Xbp1 (inferredBy_MotifSimilarity_n_Orthology).	53	449	Ace;Ank2;Argk;bab2;boss;by;CAP;cbt;CG10311;CG10659;CG10737;CG10960;CG1136;CG12290;CG14989;CG30281;CG31140;CG34398;CG42540;CG43729;CG43778;CG44085;CG5023;CG5639;CG6767;CG8740;comm3;cpo;Cpr65Au;DOR;Dscam2;Ect4;Eip75B;Flo2;fru;Gad1;Gale;GLS;Hr38;IA-2;jp;mbl;Mf;Mob2;Nplp1;Prat2;Rim;side;sNPF;Syn;tn;Zasp52;zormin
geneListName	transfac_pro__M07312	4.29	0.0707		Atf3; CrebA; CrebB; REPTOR-BP (inferredBy_MotifSimilarity).Atf6; Jra (inferredBy_MotifSimilarity_n_Orthology).	50	387	Ace;Ank2;Argk;bab2;boss;by;CAP;cbt;CG10311;CG10659;CG10737;CG10960;CG1136;CG12290;CG14989;CG30281;CG31140;CG34398;CG42540;CG42784;CG43729;CG43778;CG44085;CG5023;CG5639;CG6767;CG8740;cpo;dpr12;Dscam2;Eip75B;Flo2;fru;Gad1;Gale;GLS;Hr38;IA-2;IRSp53;jp;Mf;Mob2;Nplp1;Prat2;Rim;sNPF;Syn;wupA;Zasp52;zormin
geneListName	hocomoco__CREB1_MOUSE.H10MO.B	4.27	0.0706	CrebB (inferredBy_Orthology).	Atf3; CrebA (inferredBy_MotifSimilarity).Atf6; Jra (inferredBy_MotifSimilarity_n_Orthology).	42	302	Ace;Argk;bab2;boss;by;CAP;cbt;CG10311;CG10659;CG10737;CG10960;CG1136;CG12290;CG14989;CG30281;CG31140;CG34398;CG42784;CG43729;CG43778;CG44085;CG5023;CG5065;CG5639;CG6767;CG8740;CG9331;Eip75B;Flo2;fru;Gad1;GLS;Hr38;IA-2;Mf;Mob2;Prat2;Rim;sNPF;Syn;Zasp52;zormin
geneListName	cisbp__M6180	4.24	0.0704	CrebB (inferredBy_Orthology).	Atf3; CrebA (inferredBy_MotifSimilarity).Atf6; Jra (inferredBy_MotifSimilarity_n_Orthology).	42	301	Ace;Argk;bab2;boss;by;CAP;cbt;CG10311;CG10659;CG10737;CG10960;CG1136;CG12290;CG14989;CG30281;CG31140;CG34398;CG42784;CG43729;CG43778;CG44085;CG5023;CG5065;CG5639;CG6767;CG8740;CG9331;Eip75B;Flo2;fru;Gad1;GLS;Hr38;IA-2;Mf;Mob2;Prat2;Rim;sNPF;Syn;Zasp52;zormin
geneListName	transfac_pro__M00513	4.21	0.0701		Atf-2; CG44247 (inferredBy_MotifSimilarity).CrebB; Jra (inferredBy_MotifSimilarity_n_Orthology).	60	555	Ace;Adck;Argk;bab2;Bace;boss;by;CAP;cbt;CG10311;CG10659;CG10737;CG10960;CG1136;CG11409;CG14989;CG1648;CG30281;CG31140;CG31547;CG34398;CG42540;CG42784;CG42808;CG43729;CG44085;CG44153;CG45002;CG4741;CG5023;CG6767;CG8630;CG8740;CG9331;cpo;DOR;dpr12;Dscam2;Eip75B;Flo2;fru;Gad1;Gk2;haf;Hr38;IA-2;IRSp53;jp;mbl;Mf;Mid1;Mob2;nAChRalpha1;Prat2;Rim;Shab;sNPF;wupA;Zasp66;zormin
geneListName	transfac_public__M00041	4.20	0.0701	Jra (inferredBy_Orthology).		44	344	Ace;Argk;bab2;boss;by;CAP;cbt;CG10311;CG10659;CG10737;CG10960;CG1136;CG12290;CG14989;CG30281;CG31140;CG34398;CG42784;CG43729;CG43778;CG44085;CG5023;CG5639;CG6767;CG8740;Dscam2;Ect4;Eip75B;Flo2;fru;Gad1;GLS;Hr38;IA-2;jp;Mf;Mob2;nolo;Prat2;sNPF;Syn;tn;Zasp52;zormin
geneListName	swissregulon__hs__GATA6.p2	4.20	0.0701	pnr (inferredBy_Orthology).	HLH3B; grn (inferredBy_MotifSimilarity_n_Orthology).	303	3772	aay;Ac3;AcCoAS;Ace;Act88F;ade3;ade5;AhcyL2;Aldh;alpha-Est9;Amy-p;Ance;Ank2;Appl;arg;Argk;Arr1;atl;bab2;Bace;btsz;by;CadN;caix;CanA1;CAP;CBP;Cbp53E;cbt;CG10062;CG10311;CG10512;CG10513;CG10514;CG10559;CG10562;CG10799;CG10947;CG10960;CG11149;CG11200;CG1136;CG11409;CG11459;CG11658;CG11739;CG11912;CG1208;CG12116;CG12194;CG12290;CG12512;CG13607;CG14245;CG14688;CG14820;CG14963;CG14964;CG1544;CG15533;CG1…
geneListName	hocomoco__GATA2_MOUSE.H10MO.A	4.18	0.0700	grn (inferredBy_Orthology).	CycT; HLH3B; pnr (inferredBy_MotifSimilarity_n_Orthology).	349	4639	aay;Ac3;AcCoAS;Ace;Act88F;ade2;ade3;ade5;AhcyL2;Aldh;alpha-Est9;alphaTry;Amy-p;Ance;Ank2;Appl;arg;Argk;atk;atl;bab2;Bace;betaTry;bmm;btsz;by;CadN;caix;CAP;CBP;Cbp53E;cbt;CG10477;CG10512;CG10513;CG10514;CG10559;CG10562;CG10799;CG10947;CG10960;CG11200;CG11409;CG11459;CG11739;CG11912;CG1208;CG12194;CG12290;CG12374;CG12512;CG13607;CG13659;CG13905;CG13947;CG14245;CG14820;CG14963;CG14964;CG14989;CG1532…
geneListName	homer__GATGACGTCA_Atf1	4.18	0.0700	CrebB (inferredBy_Orthology).	Atf-2; Atf3; Atf6; CG44247; CrebA; Jra; crc; kay (inferredBy_MotifSimilarity).Xbp1 (inferredBy_MotifSimilarity_n_Orthology).	59	520	Ace;alpha-Est9;Ank2;Argk;bab2;boss;by;CAP;cbt;CG10311;CG10659;CG10737;CG10960;CG1136;CG12290;CG14989;CG30281;CG3036;CG31140;CG34398;CG42540;CG42784;CG42808;CG43729;CG43778;CG44085;CG5023;CG5639;CG6767;CG8740;CG9331;cpo;DOR;dpr12;Eip75B;Fife;Flo2;fru;Gad1;Gale;GLS;Hr38;IA-2;IRSp53;jp;mbl;Mf;Mid1;Mob2;Nplp1;Prat2;Rim;Shab;sNPF;Syn;tn;wupA;Zasp52;zormin
geneListName	jaspar__MA0967.1	4.16	0.0698		Atf-2; Atf3; Atf6; CG44247; CrebA; CrebB; Jra; cnc; crc; kay (inferredBy_MotifSimilarity).Xbp1 (inferredBy_MotifSimilarity_n_Orthology).	48	393	Ace;Argk;bab2;boss;by;CAP;cbt;CG10311;CG10659;CG10737;CG10960;CG1136;CG12290;CG14989;CG30281;CG31140;CG34398;CG42784;CG43729;CG43778;CG44085;CG5023;CG5639;CG6767;CG8740;comm3;cpo;DOR;Dscam2;Ect4;Eip75B;Flo2;fru;Gad1;GLS;Hr38;IA-2;IRSp53;jp;Mf;Mob2;Prat2;Rim;sNPF;Syn;tn;Zasp52;zormin
geneListName	cisbp__M3320	4.15	0.0698	grn (inferredBy_Orthology).	pnr (inferredBy_MotifSimilarity).GATAd; GATAe; srp (inferredBy_MotifSimilarity_n_Orthology).	337	4836	aay;Ac3;AcCoAS;Ace;Act88F;ade3;ade5;AhcyL2;Aldh;alpha-Est9;alphaTry;Amy-p;Ance;Ank2;Appl;arg;Argk;Atg18b;atk;atl;bab2;Bace;btsz;by;CadN;caix;CanA1;CAP;CBP;cbt;CG10062;CG10170;CG10477;CG10512;CG10513;CG10514;CG10559;CG10562;CG10947;CG10960;CG11147;CG11200;CG1136;CG11459;CG11658;CG11739;CG11912;CG1208;CG12194;CG12290;CG12512;CG13905;CG13947;CG14245;CG14688;CG14989;CG1532;CG1544;CG15533;CG1640;CG167…
geneListName	hocomoco__GATA2_HUMAN.H10MO.A	4.15	0.0698	grn (inferredBy_Orthology).	CycT; HLH3B; Sirt6; pnr (inferredBy_MotifSimilarity_n_Orthology).	345	4715	aay;Ac3;AcCoAS;Ace;Act88F;ade2;ade3;ade5;AhcyL2;Aldh;alpha-Est9;Amy-p;Ance;Ank2;Appl;arg;Argk;atk;atl;bab2;Bace;betaTry;bmm;btsz;by;CadN;caix;CAP;CBP;Cbp53E;cbt;CG10283;CG10311;CG10477;CG10512;CG10513;CG10514;CG10559;CG10562;CG10799;CG10947;CG10960;CG11200;CG11409;CG11459;CG11658;CG11739;CG11912;CG1208;CG12194;CG12290;CG12374;CG12512;CG13607;CG13905;CG13947;CG14245;CG14688;CG14820;CG14963;CG14964…
geneListName	transfac_public__M00348	4.12	0.0696	grn (inferredBy_Orthology).	pnr (inferredBy_MotifSimilarity).GATAd; GATAe; srp (inferredBy_MotifSimilarity_n_Orthology).	318	4490	aay;Ac3;AcCoAS;Ace;ade3;ade5;AhcyL2;Aldh;alpha-Est9;Amy-p;Ance;Ank2;Appl;arg;Argk;Atg18b;atk;bab2;Bace;btsz;by;CadN;caix;CanA1;CAP;CBP;cbt;CG10062;CG10170;CG10477;CG10512;CG10513;CG10514;CG10559;CG10562;CG10947;CG10960;CG11200;CG1136;CG11459;CG11658;CG11739;CG11912;CG1208;CG12194;CG12290;CG12512;CG13905;CG13947;CG14245;CG14688;CG14989;CG1532;CG1544;CG15533;CG1640;CG1673;CG16820;CG16965;CG16986;CG…
geneListName	predrem__nrMotif481	4.12	0.0696			114	1240	aay;AcCoAS;Ace;alpha-Est9;Ank2;Appl;Argk;ATP8B;boss;btsz;CadN;CanA1;CBP;Cbp53E;CG10311;CG10659;CG1136;CG11892;CG12290;CG14963;CG14964;CG15531;CG17571;CG18135;CG18208;CG2269;CG31345;CG31522;CG31663;CG32694;CG33181;CG34109;CG34114;CG34357;CG3902;CG3961;CG40498;CG42540;CG42784;CG43103;CG43729;CG43778;CG43897;CG44008;CG44153;CG45002;CG45057;CG5065;CG5599;CG5612;CG5639;CG5707;CG5758;CG5973;CG6295;CG77…
geneListName	homer__NRRTGACGTCAT_Atf2	4.12	0.0695		Atf-2; Atf3; Atf6; CG44247; CrebA; CrebB; Jra; crc; kay (inferredBy_MotifSimilarity).Xbp1 (inferredBy_MotifSimilarity_n_Orthology).	47	377	Ace;alpha-Est9;Argk;bab2;by;CAP;cbt;CG10659;CG10737;CG10960;CG1136;CG14989;CG1648;CG2082;CG30281;CG3036;CG31140;CG34398;CG42784;CG43729;CG44085;CG5023;CG6767;CG8740;cpo;DOR;dpr12;Eip75B;Fife;Flo2;fru;Gad1;GLS;Hr38;IA-2;IRSp53;mbl;Mf;Mob2;Nplp1;Rim;Shab;sNPF;Syn;Zasp52;Zasp66;zormin
geneListName	transfac_pro__M03544	4.05	0.0691	CrebB (inferredBy_Orthology).	Atf3 (inferredBy_MotifSimilarity).Atf6; E2f1; tj (inferredBy_MotifSimilarity_n_Orthology).	64	613	Ace;Argk;bab2;Bace;boss;by;CAP;cbt;CG10311;CG10659;CG10737;CG10960;CG1136;CG11409;CG12290;CG14989;CG30281;CG31140;CG31547;CG34398;CG42540;CG42784;CG42808;CG43729;CG43778;CG44085;CG5023;CG5177;CG5639;CG6767;CG8740;CG9331;CG9850;cpo;DOR;dpr12;Dscam2;Ect4;Eip75B;Flo2;Fmo-2;fru;Gad1;Gale;GLS;Got2;haf;Hr38;IA-2;IRSp53;mbl;Mf;Mid1;Mob2;nolo;Nplp1;Prat2;Rim;sNPF;Syn;up;wupA;Zasp52;zormin
geneListName	transfac_pro__M01820	4.05	0.0691	CrebB (inferredBy_Orthology).	Jra (inferredBy_MotifSimilarity_n_Orthology).	58	525	Ace;Argk;bab2;boss;by;CAP;cbt;CG10311;CG10659;CG10737;CG10960;CG11409;CG14989;CG1648;CG30281;CG31140;CG34398;CG42540;CG42784;CG42808;CG43729;CG43778;CG44085;CG44153;CG5023;CG5177;CG5639;CG6503;CG6767;CG9331;cpo;CR43417;DOR;dpr12;Dscam2;Eip75B;Flo2;fru;Gad1;Gale;GLS;Got2;Hr38;IA-2;IRSp53;jp;mbl;Mf;NetB;nwk;Prat2;Rim;Shab;sNPF;Syn;up;wupA;zormin
geneListName	homer__NBWGATAAGR_Gata4	4.01	0.0688	pnr (inferredBy_Orthology).	GATAe; grn; srp (inferredBy_MotifSimilarity).CycT; GATAd; HLH3B (inferredBy_MotifSimilarity_n_Orthology).	360	4839	aay;Ac3;AcCoAS;Ace;Act88F;ade3;ade5;AhcyL2;Aldh;alpha-Est9;alphaTry;Amy-p;Ance;Ank2;Appl;arg;Argk;Arr1;atk;atl;bab2;Bace;betaTry;bmm;btsz;by;CadN;caix;CAP;CBP;Cbp53E;cbt;CG10062;CG10283;CG10477;CG10512;CG10513;CG10514;CG10559;CG10562;CG10799;CG10947;CG10960;CG11149;CG11200;CG1136;CG11409;CG11459;CG11658;CG11739;CG11912;CG1208;CG12116;CG12194;CG12290;CG12374;CG12512;CG13607;CG13905;CG14245;CG14688…
geneListName	cisbp__M0259	3.98	0.0686		Atf3; Atf6; CrebA; CrebB; Jra; kay (inferredBy_MotifSimilarity).E2f1; Xbp1 (inferredBy_MotifSimilarity_n_Orthology).	46	328	Ace;Argk;bab2;boss;by;CAP;cbt;CG10311;CG10659;CG10737;CG10960;CG1136;CG12290;CG14989;CG30281;CG31140;CG34398;CG42540;CG42784;CG43729;CG43778;CG44085;CG5023;CG5065;CG5177;CG5639;CG8740;CG9331;cpo;Flo2;fru;Gad1;GLS;Hr38;IA-2;IRSp53;mbl;Mf;Mob2;Nplp1;Prat2;Rim;sNPF;Syn;wupA;Zasp52
geneListName	jaspar__MA1070.1	3.95	0.0684		Atf3; Atf6; CrebA; CrebB; Jra; kay (inferredBy_MotifSimilarity).E2f1; Xbp1 (inferredBy_MotifSimilarity_n_Orthology).	46	335	Ace;Argk;bab2;boss;by;CAP;cbt;CG10311;CG10659;CG10737;CG10960;CG1136;CG12290;CG14989;CG30281;CG31140;CG34398;CG42540;CG42784;CG43729;CG43778;CG44085;CG5023;CG5065;CG5177;CG5639;CG8740;CG9331;cpo;Flo2;fru;Gad1;GLS;Hr38;IA-2;IRSp53;mbl;Mf;Mob2;Nplp1;Prat2;Rim;sNPF;Syn;wupA;Zasp52
geneListName	transfac_pro__M01186	3.94	0.0683		Atf3; CrebA; Jra; kay (inferredBy_MotifSimilarity).CrebB; Xbp1 (inferredBy_MotifSimilarity_n_Orthology).	58	477	Ace;Argk;atl;bab2;boss;by;CAP;cbt;CG10659;CG10737;CG10960;CG1136;CG11409;CG12290;CG14989;CG1648;CG16965;CG1907;CG31140;CG31547;CG42540;CG42784;CG43729;CG43778;CG44085;CG5023;CG5065;CG5973;CG8303;CG8740;CG9331;Cyp4e3;Eip75B;Esyt2;eys;Flo2;fru;Gad1;Gk2;GLS;Got2;Hr38;IA-2;mbl;Mf;Mid1;Mob2;nAChRalpha1;Nckx30C;Nplp1;Nrx-1;Prat2;Shab;sNPF;Syn;tn;wupA;Zasp52
geneListName	transfac_pro__M04681	3.91	0.0681	Jra (inferredBy_Orthology).	Atf-2; Atf3; Atf6; CG44247; CrebA; CrebB; REPTOR-BP; cnc; kay (inferredBy_MotifSimilarity).Xbp1 (inferredBy_MotifSimilarity_n_Orthology).	38	270	Ace;Ank2;Argk;bab2;by;CAP;cbt;CG10311;CG10659;CG10737;CG10960;CG1136;CG12290;CG14989;CG30281;CG31140;CG34398;CG43729;CG43778;CG44085;CG5023;CG5639;CG8740;cpo;Eip75B;Flo2;fru;Gad1;GLS;Hr38;IA-2;Mf;Mob2;Nplp1;Prat2;sNPF;Syn;Zasp52
geneListName	transfac_pro__M00981	3.90	0.0680	Atf6; CrebB (inferredBy_Orthology).	Atf3; CrebA; REPTOR-BP (inferredBy_MotifSimilarity).Jra (inferredBy_MotifSimilarity_n_Orthology).	73	779	Ace;Ank2;Argk;bab2;boss;by;CAP;cbt;CG10311;CG10659;CG10737;CG10960;CG1136;CG11409;CG12290;CG14989;CG30281;CG31140;CG31547;CG33181;CG34398;CG3902;CG42390;CG42540;CG42784;CG42808;CG4335;CG43729;CG43778;CG44085;CG5023;CG5065;CG5177;CG5639;CG6767;CG8740;CG9331;cpo;Cpr65Au;DOR;dpr12;Dscam2;Ect4;Eip75B;Flo2;Fmo-2;fru;Gad1;Gale;Gk2;GLS;Got2;Hr38;IA-2;IRSp53;jp;mbl;Mf;Mob2;nolo;Nplp1;Nrx-1;Prat2;Rim;Shab…
geneListName	cisbp__M1875	3.90	0.0680	CG7786; Pdp1; gt (inferredBy_Orthology).	vri (inferredBy_MotifSimilarity).	62	606	AhcyL2;Ank2;arg;Argk;cbt;CG12290;CG12512;CG14989;CG17124;CG18304;CG18547;CG1907;CG2781;CG31522;CG33203;CG34114;CG3556;CG3902;CG42784;CG43078;CG4341;CG43729;CG4825;CG5177;CG5639;CG6543;CG8740;CG8861;CG9331;CG9747;CG9850;CG9990;CheA7a;Clect27;cpo;DOR;dpr12;Eip75B;Frq1;Gad1;grk;Hr38;IA-2;IRSp53;mbl;Mhc;Mlc1;Muc11A;nAChRalpha1;Nckx30C;NetB;Npc2b;nrv2;Prat2;Prm;Scsalpha;SdhC;Shab;side;tutl;VGlut;Zasp52
geneListName	homer__NGRTGACGTCAY_Atf7	3.85	0.0677		Atf-2; Atf3; Atf6; CG44247; CrebA; CrebB; Jra; REPTOR-BP; crc; kay (inferredBy_MotifSimilarity).Xbp1 (inferredBy_MotifSimilarity_n_Orthology).	50	415	Ace;alpha-Est9;Ank2;Argk;bab2;by;CAP;cbt;CG10659;CG10737;CG10960;CG1136;CG12290;CG14989;CG1648;CG2082;CG30281;CG31140;CG34398;CG42784;CG43729;CG44085;CG5023;CG6767;CG8740;CG9331;cpo;DOR;dpr12;Eip75B;Flo2;fru;Gad1;GLS;Hr38;IA-2;IRSp53;jp;mbl;Mf;Mob2;Nplp1;Prat2;Rim;Shab;sNPF;Syn;wupA;Zasp52;zormin
geneListName	transfac_pro__M00789	3.84	0.0677	grn; pnr (inferredBy_Orthology).		339	4787	aay;Ac3;AcCoAS;Ace;Act88F;ade3;ade5;AhcyL2;Aldh;alpha-Est9;alphaTry;Amy-p;Ance;Ank2;arg;Argk;atk;atl;ATP8B;bab2;Bace;betaTry;bt;btsz;by;Cad74A;CadN;caix;CanA1;CAP;cbt;CG10062;CG10311;CG10477;CG10513;CG10514;CG10559;CG10562;CG10947;CG10960;CG11149;CG11200;CG1139;CG11409;CG11459;CG11912;CG1208;CG12116;CG12194;CG12290;CG12374;CG12512;CG13905;CG14245;CG14688;CG14963;CG14964;CG14989;CG1532;CG1544;CG15…
geneListName	cisbp__M4660	3.83	0.0676	grn (inferredBy_Orthology).	HLH3B; pnr (inferredBy_MotifSimilarity_n_Orthology).	354	4961	aay;Ac3;AcCoAS;Ace;Act88F;ade3;ade5;AhcyL2;Aldh;alpha-Est9;Amy-p;Ance;Ank2;Appl;arg;Argk;atk;atl;ATP8B;bab2;Bace;beat-IIIb;betaTry;boss;btsz;by;CadN;caix;CAP;CBP;cbt;CG10311;CG10361;CG10477;CG10512;CG10513;CG10514;CG10562;CG10799;CG10960;CG11200;CG1139;CG11409;CG11459;CG11658;CG11912;CG12057;CG1208;CG12194;CG12290;CG12512;CG13607;CG13905;CG13947;CG14245;CG14820;CG14963;CG14964;CG14989;CG1532;CG15…
geneListName	hocomoco__JDP2_HUMAN.H10MO.D	3.81	0.0675		Atf-2; Atf3; Atf6; CG44247; CrebA; CrebB; Jra; REPTOR-BP; cnc; crc; kay (inferredBy_MotifSimilarity).Xbp1 (inferredBy_MotifSimilarity_n_Orthology).	56	520	Ace;Ank2;Argk;bab2;by;CadN;cbt;CG10311;CG10659;CG10737;CG10960;CG1136;CG12290;CG14989;CG1544;CG1648;CG2082;CG31140;CG34398;CG42540;CG43729;CG43778;CG44085;CG5023;CG5639;CG8547;CG8740;cpo;DOR;dpr12;Dscam2;Eip75B;Esyt2;Fife;Flo2;fru;Gad1;Gale;GLS;Hr38;IA-2;jp;mbl;Mf;Mob2;nAChRalpha1;Nckx30C;Nplp1;Prat2;Rim;RpLP0-like;Shab;sNPF;tn;wupA;Zasp52
geneListName	swissregulon__hs__ATF5_CREB3.p2	3.80	0.0673			56	520	Ace;Argk;boss;by;CAP;cbt;CG10311;CG10659;CG10737;CG10960;CG1136;CG12290;CG30281;CG31140;CG33181;CG34398;CG3902;CG42784;CG43078;CG43729;CG43778;CG44085;CG4461;CG5023;CG5065;CG5639;CG5800;CG6767;CG8740;CG9331;CG9850;comm3;Dscam2;Ect4;Eip75B;Flo2;fru;GLS;Got2;Hr38;IA-2;jp;Mf;Mid1;Mob2;nolo;Nplp1;Nrx-1;Prat2;Rim;Sema2b;sNPF;Syn;wupA;Zasp52;zormin
geneListName	jaspar__MA1047.1	3.79	0.0673		CrebB (inferredBy_MotifSimilarity_n_Orthology).	67	685	Ace;Ank2;Argk;bab2;boss;by;CAP;cbt;CG10311;CG10659;CG10737;CG10960;CG12290;CG14989;CG16965;CG30281;CG31140;CG31547;CG33181;CG34398;CG3902;CG42540;CG42784;CG43729;CG43778;CG44085;CG5023;CG5065;CG5639;CG6767;CG8740;CG9331;CG9850;comm3;cpo;Cpr65Au;Cyp4e3;DOR;dpr12;Eip75B;Flo2;fru;Gad1;Gk2;GLS;Got2;Hr38;jp;mbl;Mf;Mid1;Mob2;nAChRalpha1;Nckx30C;Nplp1;Nrx-1;Prat2;Rim;Sam-S;Sema2b;Shab;sNPF;Syn;Tm2;wupA;…
geneListName	cisbp__M0270	3.78	0.0673		CrebB (inferredBy_MotifSimilarity_n_Orthology).	67	686	Ace;Ank2;Argk;bab2;boss;by;CadN;CAP;cbt;CG10311;CG10659;CG10737;CG10960;CG12290;CG14989;CG16965;CG30281;CG31140;CG31547;CG33181;CG34398;CG3902;CG42540;CG42784;CG43729;CG43778;CG44085;CG5023;CG5065;CG5639;CG6767;CG8740;CG9331;CG9850;comm3;cpo;Cpr65Au;DOR;dpr12;Eip75B;Flo2;fru;Gad1;Gk2;GLS;Got2;Hr38;jp;mbl;Mf;Mid1;Mob2;nAChRalpha1;Nckx30C;Nplp1;Nrx-1;Prat2;Rim;Sam-S;Sema2b;Shab;sNPF;Syn;Tm2;wupA;Za…
geneListName	transfac_pro__M01861	3.78	0.0672	CrebB (inferredBy_Orthology).		44	338	Ace;Argk;bab2;boss;by;CAP;cbt;CG10311;CG10659;CG10737;CG10960;CG1136;CG11409;CG12290;CG14989;CG30281;CG31140;CG34398;CG42540;CG42784;CG43729;CG43778;CG44085;CG5023;CG5639;CG6767;CG8740;CG9331;Eip75B;Flo2;fru;Gad1;GLS;Hr38;IA-2;Mf;Mob2;Shab;sNPF;Syn;Tm2;wupA;Zasp52;zormin
geneListName	predrem__nrMotif21	3.78	0.0672			169	2148	AcCoAS;Ace;Acer;Act57B;Act88F;alpha-Est9;Ank2;Appl;Argk;beat-IIIb;boss;btsz;by;CadN;caix;CanA1;CAP;CBP;CG10283;CG10311;CG10562;CG10659;CG10947;CG10960;CG11147;CG11739;CG11892;CG12290;CG13659;CG14820;CG15531;CG16820;CG17027;CG17124;CG18135;CG18208;CG18304;CG2269;CG2781;CG30015;CG31345;CG31663;CG3376;CG34114;CG34357;CG3902;CG3961;CG40498;CG42322;CG42492;CG42540;CG42541;CG42784;CG43078;CG43103;CG433…
geneListName	cisbp__M1920	3.77	0.0672			59	580	Ace;Ank2;Argk;boss;by;CadN;CAP;cbt;CG10659;CG10737;CG10960;CG14989;CG16965;CG17386;CG31140;CG31345;CG31547;CG33181;CG34398;CG3902;CG42784;CG42808;CG43729;CG43778;CG5065;CG6767;CG8740;cpo;Cpr65Au;Cyp4e3;DOR;Eip75B;Flo2;fru;Gad1;Gk2;GLS;Got1;Got2;Hr38;IA-2;jp;mbl;Mf;Mid1;Mob2;nAChRalpha1;nolo;Nplp1;Prat2;Rim;Sam-S;Sema2b;Shab;sNPF;up;wupA;Zasp52;zormin
geneListName	jaspar__MA0096.1	3.76	0.0671			39	300	Ace;Argk;boss;by;CAP;cbt;CG10737;CG10960;CG16965;CG31140;CG31547;CG33181;CG3902;CG42784;CG43729;CG43778;CG5065;CG8740;cpo;DOR;Eip75B;Flo2;fru;GLS;Got2;Hr38;IA-2;jp;Mf;Mid1;Mob2;nAChRalpha1;nolo;Rim;Sema2b;up;wupA;Zasp52;zormin
geneListName	transfac_public__M00246	3.75	0.0671	sr (inferredBy_Orthology).	klu (inferredBy_MotifSimilarity).	40	286	btsz;CadN;CG10659;CG1136;CG14989;CG2269;CG34398;CG42322;CG42540;CG42784;CG43729;CG44153;CG5023;CG5177;Cngl;Eip75B;Fife;Flo2;fru;Gad1;haf;IA-2;mbl;Mid1;Mp20;MTF-1;nAChRalpha1;NetB;Ptr;side;sNPF;tim;Tm2;tn;Tsp;up;wupA;Zasp52;Zasp66;zormin
geneListName	cisbp__M0303	3.75	0.0671		Jra (inferredBy_MotifSimilarity).CrebB; Xbp1 (inferredBy_MotifSimilarity_n_Orthology).	55	492	Ace;Ank2;Argk;boss;by;CAP;cbt;CG10311;CG10659;CG10737;CG10960;CG1136;CG14989;CG30281;CG31140;CG31547;CG34398;CG42784;CG43729;CG43778;CG44085;CG5023;CG5065;CG5639;CG6767;CG8740;CG9331;cpo;Dscam2;Ect4;Eip75B;Flo2;fru;Gad1;Gk2;GLS;Hr38;IA-2;jp;mbl;Mf;Mid1;Mob2;Nplp1;Pax;Prat2;Rim;RpLP0-like;Shab;side;sNPF;tn;wupA;Zasp52;zormin
geneListName	cisbp__M3176	3.74	0.0670	sr (inferredBy_Orthology).	klu (inferredBy_MotifSimilarity).	40	286	btsz;CadN;CG10659;CG1136;CG14989;CG2269;CG34398;CG42322;CG42540;CG42784;CG43729;CG44153;CG5023;CG5177;Cngl;Eip75B;Fife;Flo2;fru;Gad1;haf;IA-2;mbl;Mid1;Mp20;MTF-1;nAChRalpha1;NetB;Ptr;side;sNPF;tim;Tm2;tn;Tsp;up;wupA;Zasp52;Zasp66;zormin
geneListName	yetfasco__YIL036W_585	3.74	0.0669		Atf3; REPTOR-BP (inferredBy_MotifSimilarity).Atf6; CrebB (inferredBy_MotifSimilarity_n_Orthology).	56	525	Ace;Ank2;Argk;bab2;by;cbt;CG10311;CG10659;CG10737;CG10960;CG1136;CG12290;CG14989;CG30281;CG31140;CG31547;CG33181;CG34398;CG3902;CG42784;CG43729;CG43778;CG44085;CG5023;CG5065;CG5639;CG6767;CG8740;CG9331;cpo;Cyp4e3;dpr12;Eip75B;Flo2;Gad1;Gk2;GLS;Hr38;IA-2;jp;mbl;Mf;Mid1;Mob2;Nckx30C;Nplp1;Nrx-1;Prat2;Rim;Sema2b;Shab;sNPF;Syn;tn;wupA;Zasp52
geneListName	transfac_pro__M01615	3.74	0.0669		Atf3; REPTOR-BP (inferredBy_MotifSimilarity).Atf6; CrebB (inferredBy_MotifSimilarity_n_Orthology).	58	538	Ace;Ank2;Argk;bab2;by;CAP;cbt;CG10311;CG10659;CG10737;CG10960;CG1136;CG12290;CG14989;CG30281;CG31140;CG31547;CG33181;CG34398;CG3902;CG42784;CG43729;CG43778;CG44085;CG5023;CG5065;CG5639;CG6767;CG8740;CG9331;cpo;Cyp4e3;dpr12;Eip75B;Flo2;fru;Gad1;Gk2;GLS;Hr38;IA-2;jp;mbl;Mf;Mid1;Mob2;Nckx30C;Nplp1;Nrx-1;Prat2;Rim;Sema2b;Shab;sNPF;Syn;tn;wupA;Zasp52
geneListName	cisbp__M4466	3.73	0.0669	Mef2 (inferredBy_Orthology).	rump (inferredBy_MotifSimilarity_n_Orthology).	89	933	Act57B;Act87E;Ank2;Argk;atl;bab2;beat-IIIb;bt;btsz;CadN;caix;CanA1;CBP;Cbp53E;cbt;CG10663;CG10737;CG11658;CG14964;CG1673;CG18208;CG18304;CG31140;CG33181;CG34114;CG3902;CG3999;CG42390;CG43102;CG4341;CG43729;CG43897;CG44085;CG45002;CG5065;CG5612;CG5867;CG7409;cpo;CR43417;dpr12;Ect4;Eip75B;Esyt2;eys;fbp;Flo2;GLS;haf;hig;Hr38;IA-2;jp;l(2)01289;Mal-A3;mbl;Men;Mhc;Mlc1;Mlc2;Mp20;Msr-110;MTF-1;nAChRalph…
geneListName	homer__CTTGGCACNGTGCCAA_NF1	3.73	0.0669	Nf1 (inferredBy_Orthology).	NfI (inferredBy_MotifSimilarity).nau (inferredBy_MotifSimilarity_n_Orthology).	67	678	Ace;Act57B;Argk;Arr1;beat-IIIb;btsz;CadN;CAP;Cbp53E;CG10311;CG17124;CG18208;CG18304;CG2082;CG31663;CG32549;CG34109;CG34114;CG34324;CG34357;CG42390;CG42492;CG42540;CG42784;CG43729;CG43897;CG44153;CG5023;CG5065;CG5707;CG6746;CG6767;CG7720;CG8740;comm3;Cow;cpo;DOR;dpr12;Dscam2;Eaat2;Ect4;Eip75B;Fife;fru;haf;Invadolysin;Ktl;l(2)01289;Lip2;Mal-B2;mbl;Mf;Mob2;nAChRalpha1;NetB;Pax;Prm;Sema2b;Shab;side;S…
geneListName	taipale__RORA_DBD_NRAAGGTCAANNNNRGGTCA	3.72	0.0668	Hr3 (inferredBy_Orthology).	ERR; svp (inferredBy_MotifSimilarity_n_Orthology).	297	4689	18SrRNA-Psi:CR41602;Ac3;AcCoAS;Ace;Act79B;ade3;ade5;AhcyL2;Aldh;alpha-Est9;Ank2;Appl;Arc1;arg;Argk;Arr2;atk;atl;ATP8B;bab2;beat-IIIb;bt;btsz;Cad74A;CadN;Cadps;caix;CAP;CBP;Cbp53E;cbt;CG10283;CG10359;CG10663;CG10947;CG10960;CG11147;CG1136;CG11409;CG11658;CG11892;CG1208;CG12950;CG13659;CG13905;CG14989;CG1532;CG15533;CG15765;CG1648;CG1673;CG16965;CG17124;CG17386;CG17751;CG17896;CG18208;CG18547;CG190…
geneListName	transfac_pro__M07248	3.72	0.0668	CrebB (inferredBy_Orthology).	Atf6 (inferredBy_MotifSimilarity_n_Orthology).	51	422	Ace;bab2;boss;by;CAP;cbt;CG10311;CG10659;CG10737;CG10960;CG1136;CG11409;CG14989;CG30281;CG31140;CG31547;CG34398;CG42540;CG42784;CG42808;CG43729;CG43778;CG44085;CG5023;CG5639;CG6767;CG8740;CG9331;CG9850;dpr12;Dscam2;Eip75B;Flo2;fru;Gad1;GLS;Got2;Hr38;IA-2;IRSp53;mbl;Mf;Mob2;Prat2;Rim;sNPF;up;wupA;Zasp52;Zasp66;zormin
geneListName	cisbp__M5406	3.72	0.0668	ERR (inferredBy_Orthology).	Hr3; ftz-f1 (inferredBy_MotifSimilarity_n_Orthology).	182	2423	AcCoAS;Ace;Act87E;Act88F;ade3;Aldh;alpha-Est9;Ank2;arg;Arr2;ATP8B;bab2;beat-IIIb;boss;btsz;by;CadN;Cadps;caix;CAP;cbt;CG10170;CG10283;CG10960;CG11409;CG12290;CG13905;CG14989;CG1544;CG15765;CG1648;CG17124;CG17386;CG17571;CG18208;CG18547;CG1907;CG1946;CG2017;CG2082;CG2187;CG2269;CG2781;CG30015;CG3036;CG31345;CG31523;CG31548;CG32280;CG32694;CG33110;CG33181;CG34114;CG34357;CG34398;CG3534;CG3556;CG400…
geneListName	cisbp__M5786	3.70	0.0667	Hr3 (inferredBy_Orthology).	ERR; svp (inferredBy_MotifSimilarity_n_Orthology).	161	1982	AcCoAS;Ace;ade3;ade5;Aldh;alpha-Est9;Ank2;Argk;Arr2;atl;ATP8B;boss;btsz;Cad74A;CadN;Cadps;caix;cbt;CG10283;CG10960;CG11147;CG13947;CG14989;CG15765;CG1648;CG1695;CG17124;CG17386;CG18208;CG18404;CG18547;CG1946;CG2082;CG2187;CG2269;CG2781;CG30015;CG3036;CG31140;CG31522;CG31999;CG32280;CG32549;CG32633;CG32694;CG33110;CG34114;CG34357;CG3534;CG3961;CG4000;CG40498;CG42541;CG42784;CG43102;CG43103;CG4335;…
geneListName	homer__CAGATAAGGN_Gata1	3.70	0.0667	grn (inferredBy_Orthology).	CycT; HLH3B; pnr (inferredBy_MotifSimilarity_n_Orthology).	352	4728	aay;Ac3;AcCoAS;Ace;Act88F;ade2;ade3;ade5;AhcyL2;Aldh;alpha-Est9;alphaTry;Amy-p;Ance;Ank2;Appl;arg;Argk;atk;atl;bab2;Bace;bmm;btsz;by;CadN;caix;CAP;CBP;Cbp53E;cbt;CG10283;CG10512;CG10513;CG10514;CG10559;CG10562;CG10799;CG10947;CG10960;CG11200;CG11409;CG11459;CG11658;CG11739;CG11912;CG1208;CG12116;CG12194;CG12290;CG12374;CG12512;CG13607;CG13659;CG13905;CG14245;CG14688;CG14820;CG14963;CG14964;CG1498…
geneListName	cisbp__M0347	3.69	0.0666		REPTOR-BP (inferredBy_MotifSimilarity).Atf6; CrebB (inferredBy_MotifSimilarity_n_Orthology).	60	586	Ace;Ank2;Argk;bab2;boss;by;CAP;cbt;CG10311;CG10659;CG10737;CG10960;CG1136;CG12290;CG14989;CG30281;CG31140;CG3267;CG34398;CG42784;CG42808;CG43729;CG43778;CG44085;CG5023;CG5639;CG6767;CG8740;CG9331;comm3;cpo;Cpr65Au;DOR;dpr12;Dscam2;Ect4;Eip75B;Flo2;fru;Gad1;Gale;GLS;haf;Hr38;IA-2;jp;mbl;Mf;Mid1;Mob2;Nplp1;Pax;Prat2;Rim;side;sNPF;Syn;tn;Zasp52;zormin
geneListName	jaspar__MA0286.1	3.68	0.0666		Atf3; REPTOR-BP (inferredBy_MotifSimilarity).Atf6; CrebB (inferredBy_MotifSimilarity_n_Orthology).	58	556	Ace;Ank2;Argk;bab2;by;CAP;cbt;CG10311;CG10659;CG10737;CG10960;CG1136;CG12290;CG14989;CG30281;CG31140;CG31547;CG33181;CG34398;CG3902;CG42784;CG43729;CG43778;CG44085;CG5023;CG5065;CG5639;CG6767;CG8740;CG9331;cpo;Cyp4e3;dpr12;Eip75B;Flo2;fru;Gad1;Gk2;GLS;Hr38;IA-2;jp;mbl;Mf;Mid1;Mob2;Nckx30C;Nplp1;Nrx-1;Prat2;Rim;Sema2b;Shab;sNPF;Syn;tn;wupA;Zasp52
geneListName	stark__TGACGTCAT	3.67	0.0665	CrebA (directAnnotation).	Atf-2; Atf3; Atf6; CG44247; CrebB; Jra; REPTOR-BP; cnc; crc; kay (inferredBy_MotifSimilarity).Xbp1 (inferredBy_MotifSimilarity_n_Orthology).	86	949	Ace;Ank2;Argk;bab2;boss;by;caix;CAP;cbt;CG10311;CG10659;CG10737;CG10960;CG1136;CG12290;CG14989;CG15533;CG1648;CG16965;CG2082;CG2269;CG30281;CG3036;CG31140;CG33181;CG34398;CG42540;CG42808;CG43729;CG43778;CG44085;CG45057;CG5023;CG5065;CG5639;CG5800;CG6767;CG8740;CG9990;CheA7a;comm3;cpo;Cpr67B;Cyp4e3;DOR;dpr12;Dscam2;Ect4;Eip75B;Esyt2;Fife;Flo2;fru;Gad1;Gale;GLS;haf;Hr38;IA-2;Invadolysin;IRSp53;jp;m…
geneListName	transfac_pro__M04746	3.67	0.0665	E2f1 (inferredBy_Orthology).	Atf3 (inferredBy_MotifSimilarity).CrebB (inferredBy_MotifSimilarity_n_Orthology).	47	405	Ace;Argk;bab2;boss;by;CAP;cbt;CG10311;CG10659;CG10737;CG10960;CG1136;CG11409;CG14989;CG30281;CG31140;CG42540;CG42808;CG43729;CG43778;CG44085;CG5023;CG5065;CG5639;CG6767;CG8740;Dscam2;Eip75B;Flo2;Fmo-2;fru;Gad1;Gale;GLS;Hr38;IA-2;lama;Mf;nAChRalpha1;Prat2;Rim;side;sNPF;Syn;up;Zasp52;zormin
geneListName	cisbp__M4307	3.66	0.0664		Atf3; REPTOR-BP (inferredBy_MotifSimilarity).Atf6; CrebB (inferredBy_MotifSimilarity_n_Orthology).	71	741	Ace;Ank2;Argk;bab2;boss;by;CAP;cbt;CG10311;CG10659;CG10737;CG10960;CG1136;CG12290;CG14989;CG16965;CG30281;CG31140;CG31547;CG33181;CG34398;CG3902;CG42540;CG42784;CG43729;CG43778;CG44085;CG5023;CG5065;CG5639;CG6767;CG8740;CG9331;cpo;Cpr65Au;Cyp4e3;DOR;dpr12;Dscam2;Ect4;Eip75B;Flo2;fru;Gad1;Gale;Gk2;GLS;Got2;Hr38;IA-2;jp;mbl;Mf;Mhc;Mid1;Mob2;nAChRalpha1;Nckx30C;Nplp1;Nrx-1;Pax;Prat2;Rim;RpLP0-like;S…
geneListName	cisbp__M2091	3.66	0.0664		Atf3; REPTOR-BP (inferredBy_MotifSimilarity).Atf6; CrebB (inferredBy_MotifSimilarity_n_Orthology).	58	555	Ace;Ank2;Argk;bab2;by;CAP;cbt;CG10311;CG10659;CG10737;CG10960;CG1136;CG12290;CG14989;CG30281;CG31140;CG31547;CG33181;CG34398;CG3902;CG42784;CG43729;CG43778;CG44085;CG5023;CG5065;CG5639;CG6767;CG8740;CG9331;cpo;Cyp4e3;dpr12;Eip75B;Flo2;fru;Gad1;Gk2;GLS;Hr38;IA-2;jp;mbl;Mf;Mid1;Mob2;Nckx30C;Nplp1;Nrx-1;Prat2;Rim;Sema2b;Shab;sNPF;Syn;tn;wupA;Zasp52
geneListName	transfac_pro__M07863	3.66	0.0664	NfI (directAnnotation).	C15; Nf1 (inferredBy_MotifSimilarity_n_Orthology).	56	507	Ace;Act57B;Argk;beat-IIIb;btsz;CadN;CAP;Cbp53E;CG10311;CG17124;CG18208;CG18304;CG2082;CG34114;CG34357;CG42322;CG42390;CG42492;CG42540;CG42784;CG43729;CG44153;CG5023;CG5707;CG6746;CG6767;CG7720;CG9850;comm3;Cow;cpo;DOR;Dscam2;Ect4;Eip75B;Fife;Invadolysin;Ktl;l(2)01289;Lip2;Mal-B2;mbl;Mf;Mhc;Mob2;nAChRalpha1;NetB;Pax;Prm;salr;Sema2b;SERCA;side;SLC22A;Syn;tn
geneListName	taipale__ESRRG_full_RAGGTCANTCAAGGTCA	3.66	0.0664	ERR (inferredBy_Orthology).	ftz-f1 (inferredBy_MotifSimilarity_n_Orthology).	195	2578	18SrRNA-Psi:CR41602;Ac3;Ace;AhcyL2;alpha-Est9;Arr2;Atg18b;ATP8B;bab2;Bace;beat-IIIb;bt;btsz;by;CadN;caix;CanA1;CAP;Cbp53E;cbt;Cdk5alpha;CG10283;CG10361;CG10737;CG10947;CG10960;CG1136;CG11409;CG11658;CG12116;CG12512;CG13124;CG13905;CG13947;CG1416;CG14688;CG14757;CG1544;CG15765;CG16820;CG17386;CG18208;CG18404;CG1907;CG1946;CG2082;CG2187;CG2765;CG2781;CG30015;CG31522;CG31523;CG31547;CG31663;CG32280;…
geneListName	transfac_pro__M07670	3.66	0.0664	Atf6 (directAnnotation).	Atf3; CG44247; CrebA; CrebB; Jra; REPTOR-BP; cnc; kay (inferredBy_MotifSimilarity).Xbp1 (inferredBy_MotifSimilarity_n_Orthology).	77	825	Ace;Ank2;Argk;bab2;boss;by;CadN;CAP;cbt;CG10311;CG10659;CG10737;CG10960;CG1136;CG11409;CG12290;CG14989;CG1544;CG1648;CG16965;CG2082;CG30281;CG31140;CG33181;CG34398;CG42540;CG42808;CG43729;CG43778;CG44085;CG44153;CG45057;CG5023;CG6767;CG8547;CG8740;CG9331;cpo;Cyp4e3;DOR;dpr12;Dscam2;Eip75B;Esyt2;eys;Fife;Flo2;Fmo-2;fru;Gad1;Gale;GLS;haf;Hr38;IA-2;mbl;Mf;Mid1;Mob2;nAChRalpha1;Nckx30C;Nplp1;Prat2;Ri…
geneListName	homer__NCCTTATCTC_Gata2	3.66	0.0664	grn (inferredBy_Orthology).	CycT; HLH3B; pnr (inferredBy_MotifSimilarity_n_Orthology).	347	4792	aay;Ac3;AcCoAS;Ace;Act88F;ade2;ade3;ade5;AhcyL2;Aldh;alpha-Est9;alphaTry;Amy-p;Ance;Ank2;Appl;arg;Argk;atl;bab2;Bace;bmm;btsz;by;CadN;caix;CAP;CBP;Cbp53E;cbt;CG10311;CG10512;CG10513;CG10514;CG10559;CG10562;CG10799;CG10947;CG10960;CG11200;CG11409;CG11459;CG11658;CG11739;CG11912;CG1208;CG12116;CG12194;CG12290;CG12374;CG12512;CG13607;CG13905;CG14245;CG14688;CG14820;CG14963;CG14964;CG14989;CG1532;CG1…
geneListName	taipale__XBP1_DBD_GATGACGTCATC	3.65	0.0664	Xbp1 (inferredBy_Orthology).	Atf-2; Atf3; Atf6; CG44247; CrebA; CrebB; Jra; crc; kay (inferredBy_MotifSimilarity).	60	531	Ace;Ank2;Argk;bab2;boss;by;CAP;cbt;CG10659;CG10737;CG10960;CG1136;CG11409;CG14989;CG16965;CG2082;CG30281;CG31140;CG31547;CG34398;CG42540;CG42808;CG43729;CG43778;CG44085;CG44153;CG5023;CG5065;CG8303;CG8740;CG9331;cpo;Cyp4e3;DOR;Eip75B;Esyt2;eys;Flo2;fru;Gad1;Gk2;GLS;haf;Hr38;jp;mbl;Mf;Mid1;Mob2;nAChRalpha1;Nplp1;Prat2;Rim;RpLP0-like;Shab;sNPF;up;wupA;Zasp52;zormin
geneListName	taipale__NFIB_full_TTGGCANNNTGCCAR	3.65	0.0664	NfI (inferredBy_Orthology).	C15; Nf1 (inferredBy_MotifSimilarity_n_Orthology).	53	496	Act57B;Argk;beat-IIIb;CadN;CAP;Cbp53E;CG10311;CG17124;CG18208;CG18304;CG2082;CG31663;CG34114;CG34357;CG42322;CG42390;CG42492;CG42540;CG42784;CG43729;CG44153;CG5023;CG5707;CG6746;CG6767;CG7720;CG9850;comm3;Cow;cpo;DOR;Dscam2;Ect4;Eip75B;Fife;Invadolysin;Ktl;l(2)01289;Lip2;Mal-B2;mbl;Mf;Mob2;nAChRalpha1;NetB;Pax;Prm;Sema2b;SERCA;side;SLC22A;Syn;tn
geneListName	cisbp__M6255	3.65	0.0664	grn (inferredBy_Orthology).	pnr (inferredBy_MotifSimilarity_n_Orthology).	358	4991	aay;Ac3;AcCoAS;Ace;Act57B;Act88F;ade3;ade5;AhcyL2;Aldh;alpha-Est9;Amy-p;Ance;Ank2;Aplip1;Appl;arg;Argk;ATP8B;bab2;Bace;beat-IIIb;betaTry;boss;bt;btsz;by;Cad74A;CadN;caix;CanA1;CAP;cbt;CG10062;CG10311;CG10477;CG10512;CG10513;CG10514;CG10562;CG10659;CG10947;CG10960;CG11147;CG11200;CG1136;CG1139;CG11409;CG11459;CG11912;CG12057;CG1208;CG12194;CG12290;CG12512;CG13905;CG13947;CG14245;CG14688;CG14963;CG…
geneListName	transfac_pro__M07682	3.65	0.0664	CrebB (directAnnotation).	Atf-2; Atf3; Atf6; CG44247; CrebA; Jra; REPTOR-BP; cnc; crc; kay (inferredBy_MotifSimilarity).Xbp1 (inferredBy_MotifSimilarity_n_Orthology).	53	473	Ace;Ank2;Argk;bab2;boss;by;CAP;cbt;CG10311;CG10659;CG10737;CG10960;CG1136;CG12290;CG14989;CG30281;CG31140;CG3267;CG34398;CG42540;CG43729;CG43778;CG44085;CG5023;CG5639;CG6767;CG8740;CG9331;cpo;DOR;dpr12;Eip75B;Flo2;fru;Gad1;GLS;haf;Hr38;IA-2;jp;mbl;Mf;Mob2;Nplp1;Prat2;Rim;RpLP0-like;Shab;sNPF;Syn;wupA;Zasp52;zormin
geneListName	transfac_pro__M04057	3.65	0.0663	NfI (inferredBy_Orthology).	C15; Nf1 (inferredBy_MotifSimilarity_n_Orthology).	50	459	Act57B;Argk;beat-IIIb;CadN;CAP;Cbp53E;CG10311;CG17124;CG18208;CG18304;CG2082;CG31663;CG34114;CG34357;CG42390;CG42492;CG42540;CG42784;CG44153;CG5023;CG5707;CG6746;CG6767;CG7720;CG9850;comm3;Cow;cpo;DOR;Dscam2;Ect4;Eip75B;Fife;Ktl;l(2)01289;Lip2;Mal-B2;mbl;Mf;Mob2;nAChRalpha1;NetB;Pax;Prm;Sema2b;SERCA;side;SLC22A;Syn;tn
geneListName	cisbp__M4467	3.64	0.0663		Mef2; rump (inferredBy_MotifSimilarity_n_Orthology).	144	1783	Act57B;Act87E;Ank2;AQP;arg;Argk;atl;bab2;beat-IIIb;bt;btsz;by;CadN;caix;CanA1;CAP;CBP;Cbp53E;cbt;CG10663;CG10737;CG1136;CG11658;CG11835;CG13947;CG14964;CG15201;CG15533;CG1673;CG18208;CG18304;CG2082;CG30015;CG31140;CG32280;CG32486;CG33110;CG33181;CG34109;CG34114;CG34398;CG3902;CG3999;CG40498;CG42390;CG42540;CG42784;CG43078;CG43102;CG4341;CG43729;CG43778;CG43897;CG44085;CG44153;CG4461;CG45002;CG450…
geneListName	cisbp__M0782	3.64	0.0663	pnr (inferredBy_Orthology).	GATAe (inferredBy_MotifSimilarity).CycT; GATAd; HLH3B; grn; srp (inferredBy_MotifSimilarity_n_Orthology).	250	2884	Ac3;AcCoAS;Ace;ade5;AhcyL2;Aldh;alpha-Est9;Amy-p;Ance;Ank2;arg;Argk;bab2;Bace;betaTry;btsz;by;Cad74A;CadN;caix;CanA1;CAP;cbt;CG10062;CG10513;CG10514;CG10559;CG10562;CG10947;CG10960;CG11149;CG11200;CG1136;CG1139;CG11912;CG12194;CG12512;CG14245;CG14688;CG14963;CG14964;CG1544;CG15533;CG1640;CG16820;CG16965;CG17124;CG17571;CG18003;CG18208;CG18417;CG18547;CG1907;CG1946;CG2187;CG2765;CG2781;CG30015;CG3…
geneListName	cisbp__M5952	3.64	0.0663	Xbp1 (inferredBy_Orthology).	Atf-2; Atf3; Atf6; CG44247; CrebA; CrebB; Jra; crc; kay (inferredBy_MotifSimilarity).	61	570	Ace;Ank2;Argk;bab2;boss;by;CAP;cbt;CG10659;CG10737;CG10960;CG1136;CG11409;CG14989;CG1544;CG16965;CG2082;CG30281;CG31140;CG31547;CG34398;CG42540;CG42808;CG43729;CG43778;CG44085;CG44153;CG5023;CG5065;CG8303;CG8740;CG9331;cpo;Cyp4e3;DOR;Eip75B;Esyt2;eys;Flo2;fru;Gad1;Gk2;GLS;haf;Hr38;jp;mbl;Mf;Mid1;Mob2;nAChRalpha1;Nplp1;Prat2;Rim;RpLP0-like;Shab;sNPF;up;wupA;Zasp52;zormin
geneListName	taipale__NFIA_full_TTGGCANNNTGCCAR_repr	3.63	0.0662	NfI (inferredBy_Orthology).	C15; Nf1 (inferredBy_MotifSimilarity_n_Orthology).	59	579	Ace;Act57B;Argk;beat-IIIb;btsz;CadN;CAP;Cbp53E;CG10311;CG1640;CG17124;CG18208;CG18304;CG2082;CG31663;CG34114;CG34357;CG42322;CG42390;CG42492;CG42540;CG42784;CG43729;CG44153;CG5023;CG5065;CG5707;CG6746;CG6767;CG7720;CG9850;comm3;Cow;cpo;DOR;Dscam2;Ect4;Eip75B;Fife;fru;Invadolysin;Ktl;l(2)01289;Lip2;Mal-B2;mbl;Mf;Mhc;Mob2;nAChRalpha1;NetB;Pax;Prm;Sema2b;SERCA;side;SLC22A;Syn;tn
geneListName	transfac_pro__M01863	3.62	0.0661		CrebB (inferredBy_MotifSimilarity_n_Orthology).	83	922	Ace;Adck;alpha-Est9;Ank2;arg;Argk;bab2;beat-IIIb;boss;by;CAP;cbt;CG10659;CG10737;CG10960;CG1136;CG13124;CG14989;CG1648;CG1673;CG30015;CG30281;CG3036;CG31140;CG31547;CG34114;CG34398;CG42540;CG42784;CG42808;CG4306;CG4335;CG43729;CG43897;CG44085;CG44153;CG45057;CG4741;CG5023;CG5177;CG8547;CG8654;CG8740;CG9331;CG9850;CheA7a;Clect27;cpo;DOR;dpr12;Eip75B;Esyt2;Flo2;Gad1;GLS;Got2;haf;Hr38;IA-2;IRSp53;jp…
geneListName	transfac_pro__M02738	3.62	0.0661	CrebB (inferredBy_Orthology).	Atf-2; Atf3; Atf6; CG44247; CrebA; Jra; REPTOR-BP; kay (inferredBy_MotifSimilarity).Xbp1 (inferredBy_MotifSimilarity_n_Orthology).	67	645	Ace;Ank2;Argk;bab2;boss;by;CadN;CAP;cbt;CG10311;CG10659;CG10737;CG10960;CG1136;CG11409;CG12290;CG14989;CG1544;CG2082;CG30281;CG31140;CG31547;CG34398;CG42540;CG42784;CG42808;CG43729;CG43778;CG44085;CG5023;CG5639;CG6767;CG8740;CG9331;cpo;DOR;dpr12;Dscam2;Eip75B;Esyt2;Flo2;fru;Gad1;Gale;GLS;haf;Hr38;IA-2;jp;mbl;Mf;Mid1;Mob2;nAChRalpha1;Nplp1;Prat2;Rim;RpLP0-like;Shab;side;sNPF;Syn;tn;wupA;Zasp52;Zas…
geneListName	transfac_pro__M01600	3.59	0.0660		CrebB (inferredBy_MotifSimilarity_n_Orthology).	58	573	Ace;Ank2;Argk;boss;by;CAP;cbt;CG10737;CG1136;CG14989;CG15533;CG1648;CG16965;CG30281;CG3036;CG31140;CG3267;CG34114;CG34398;CG42808;CG43729;CG44085;CG45057;CG5065;CG5800;CG8740;CG8907;CheA7a;cpo;Cpr67B;DOR;drd;Eip75B;Flo2;fru;Gad1;GLS;haf;Hr38;IA-2;Invadolysin;jp;mbl;Mf;Mid1;Mob2;nAChRalpha1;NetB;Nplp1;Rim;RpLP0-like;SdhB;Shab;side;up;wupA;Zasp52;zormin
geneListName	transfac_pro__M00917	3.59	0.0660	CrebB (inferredBy_Orthology).	Atf-2; Atf3; CG44247; CrebA (inferredBy_MotifSimilarity).Atf6; E2f1; Jra (inferredBy_MotifSimilarity_n_Orthology).	37	274	Ace;boss;by;CAP;cbt;CG10659;CG10737;CG10960;CG11409;CG14989;CG30281;CG31140;CG31547;CG42784;CG42808;CG43729;CG43778;CG44085;CG5023;CG5065;CG8740;CG9331;Flo2;fru;Gad1;GLS;Got2;haf;Hr38;IRSp53;Mf;Mob2;Prat2;Rim;sNPF;wupA;Zasp52
geneListName	transfac_pro__M01187	3.58	0.0659		Atf-2; Atf3; CG44247; CrebA; CrebB; Jra; crc; kay (inferredBy_MotifSimilarity).E2f1; Xbp1 (inferredBy_MotifSimilarity_n_Orthology).	61	555	Ace;Ank2;Argk;atl;bab2;by;cbt;CG10311;CG10659;CG10737;CG10960;CG1136;CG11409;CG12290;CG14989;CG1648;CG16965;CG2082;CG30281;CG31140;CG31547;CG34398;CG42540;CG42784;CG43729;CG43778;CG44085;CG5023;CG6767;CG8740;CG9331;cpo;Cyp4e3;Dscam2;Eip75B;Esyt2;eys;Flo2;fru;Gad1;Gale;Gk2;GLS;Hr38;IA-2;jp;mbl;Mf;Mid1;Mob2;nAChRalpha1;Nckx30C;Nplp1;Prat2;Rim;Shab;sNPF;Syn;tn;wupA;Zasp52
geneListName	factorbook__MEF2	3.58	0.0659	Mef2 (inferredBy_Orthology).	rump (inferredBy_MotifSimilarity_n_Orthology).	97	1066	Act57B;Act87E;Ank2;Argk;atl;bab2;beat-IIIb;bt;btsz;CadN;caix;CanA1;CBP;Cbp53E;cbt;CG10663;CG10737;CG1136;CG11658;CG11835;CG14964;CG1673;CG18208;CG18304;CG31140;CG33181;CG34398;CG3902;CG3999;CG42390;CG42540;CG43078;CG43102;CG4341;CG43729;CG43897;CG44085;CG45002;CG5065;CG5612;CG5867;CG7409;CG7720;CG9990;cpo;Cpr67B;CR43417;dpr12;Ect4;Eip75B;Esyt2;eys;fbp;Flo2;Gale;GLS;haf;hig;Hr38;IA-2;jp;Ktl;l(2)01…
geneListName	hocomoco__GATA1_MOUSE.H10MO.A	3.56	0.0657	grn (inferredBy_Orthology).	CycT; HLH3B; Sirt6; pnr (inferredBy_MotifSimilarity_n_Orthology).	364	4947	aay;Ac3;AcCoAS;Ace;Act88F;ade2;ade3;ade5;AhcyL2;Aldh;alpha-Est9;alphaTry;Amy-p;Ance;Ank2;Appl;arg;Argk;atk;atl;ATP8B;bab2;Bace;bmm;btsz;by;CadN;caix;CAP;CBP;Cbp53E;cbt;CG10283;CG10311;CG10361;CG10477;CG10512;CG10513;CG10514;CG10559;CG10562;CG10799;CG10947;CG10960;CG11200;CG11409;CG11459;CG11658;CG11739;CG11912;CG1208;CG12116;CG12194;CG12290;CG12374;CG12512;CG13607;CG13905;CG13947;CG14245;CG14820;…
geneListName	taipale__NFIX_full_YTGGCNNNNTGCCAA	3.54	0.0656	NfI (inferredBy_Orthology).	C15; Nf1 (inferredBy_MotifSimilarity_n_Orthology).	49	417	Act57B;Argk;beat-IIIb;btsz;CadN;CAP;Cbp53E;CG10311;CG17124;CG18208;CG18304;CG2082;CG34114;CG34357;CG42390;CG42492;CG42540;CG42784;CG43729;CG5023;CG5707;CG6746;CG6767;CG7720;CG9850;comm3;Cow;cpo;Dscam2;Ect4;Eip75B;Fife;haf;Invadolysin;Ktl;l(2)01289;Lip2;Mal-B2;mbl;Mf;Mob2;nAChRalpha1;Pax;Prm;Sema2b;side;SLC22A;Syn;tn
geneListName	cisbp__M1136	3.54	0.0656	achi; hth; vis (inferredBy_Orthology).		73	733	aay;Ace;Act88F;Ank2;Argk;bab2;boss;by;CAP;cbt;CG10311;CG10659;CG10737;CG10960;CG1136;CG12290;CG14989;CG30281;CG31140;CG31547;CG3267;CG34398;CG42540;CG42784;CG43729;CG43778;CG44085;CG44153;CG5023;CG5065;CG5639;CG5800;CG6084;CG6767;CG8740;CG9331;Clect27;comm3;cpo;Cyp4e3;dpr12;Dscam2;Ect4;Eip75B;Flo2;fru;Gad1;Gale;Gk2;GLS;Hr38;IA-2;IRSp53;jp;lama;mbl;Mf;Mid1;Mob2;Nplp1;Nrx-1;Prat2;Rbp9;Sema2b;Shab;s…
geneListName	transfac_pro__M07246	3.53	0.0656		Atf3; CG6272; CrebA; Jra; crc; kay (inferredBy_MotifSimilarity).Atf6; CrebB; Xbp1 (inferredBy_MotifSimilarity_n_Orthology).	79	793	Ace;Act57B;Adck;alpha-Est9;Argk;beat-IIIb;boss;by;CadN;CAP;Cbp53E;cbt;CG10311;CG10359;CG10659;CG10737;CG1090;CG10960;CG11089;CG11147;CG1136;CG13124;CG14989;CG1544;CG1648;CG1673;CG18208;CG2082;CG2269;CG30015;CG30281;CG31140;CG31547;CG34398;CG42540;CG42784;CG42808;CG43729;CG43778;CG44085;CG45002;CG45057;CG4741;CG5023;CG5177;CG6767;CG8547;CG8740;CG8907;CG9572;CG9850;Clect27;comm3;dpr12;Esyt2;eys;Fif…
geneListName	cisbp__M5664	3.53	0.0655	NfI (inferredBy_Orthology).	C15; Nf1 (inferredBy_MotifSimilarity_n_Orthology).	49	432	Act57B;Argk;beat-IIIb;btsz;CadN;CAP;Cbp53E;CG10311;CG17124;CG18208;CG18304;CG2082;CG34114;CG34357;CG42390;CG42492;CG42540;CG42784;CG43729;CG5023;CG5707;CG6746;CG6767;CG7720;CG9850;comm3;Cow;cpo;Dscam2;Ect4;Eip75B;Fife;haf;Invadolysin;Ktl;l(2)01289;Lip2;Mal-B2;mbl;Mf;Mob2;nAChRalpha1;Pax;Prm;Sema2b;side;SLC22A;Syn;tn
geneListName	elemento__GACGTCAC	3.52	0.0655			68	685	Ace;bab2;boss;by;CAP;cbt;CG10311;CG10659;CG10663;CG10960;CG1136;CG11409;CG12099;CG12290;CG14989;CG1640;CG2082;CG30281;CG31140;CG32549;CG34398;CG42390;CG42540;CG42784;CG43729;CG44085;CG5023;CG5065;CG5177;CG5639;CG6084;CG6767;CG8740;CG9331;CG9850;comm3;Cpr65Au;DOR;dpr12;Dscam2;Ect4;Eip75B;Flo2;Fmo-2;fru;Gad1;Gale;GLS;haf;Hr38;IA-2;lama;mbl;Mf;Mob2;NetB;Prat2;Rim;Shab;sNPF;Syn;Syt4;Tm2;tn;Vha68-1;wu…
geneListName	transfac_pro__M02772	3.52	0.0655		Atf-2; Atf3; Atf6; CG44247; CrebA; CrebB; Jra; REPTOR-BP; kay (inferredBy_MotifSimilarity).Xbp1 (inferredBy_MotifSimilarity_n_Orthology).	73	762	Ace;Ank2;Argk;bab2;boss;by;CAP;cbt;CG10311;CG10659;CG10737;CG10960;CG1136;CG11409;CG14989;CG1544;CG1648;CG18208;CG2082;CG30281;CG3036;CG31140;CG31547;CG34398;CG42540;CG42784;CG42808;CG43729;CG43778;CG44085;CG44153;CG45057;CG5023;CG6767;CG8547;CG8740;CG9331;CG9990;cpo;Cpr67B;Cyp4e3;DOR;dpr12;Eip75B;Esyt2;Fife;Flo2;fru;Gad1;GLS;haf;Hr38;IA-2;IRSp53;jp;mbl;Mf;Mid1;Mob2;nAChRalpha1;Nplp1;Prat2;Rim;Rp…
geneListName	transfac_pro__M07573	3.52	0.0654			52	489	Ace;Argk;atl;boss;by;CadN;CAP;cbt;CG10659;CG10737;CG10960;CG14989;CG16965;CG1907;CG31140;CG31345;CG31547;CG42540;CG42784;CG42808;CG43729;CG43778;CG44085;CG5023;CG5973;CG6767;CG8740;cpo;Eip75B;fru;Gad1;Gale;Gk2;GLS;Got2;haf;Hr38;IA-2;mbl;Men;Mf;nAChRalpha1;Nckx30C;Prat2;RpLP0-like;Sema2b;Shab;sNPF;tn;up;wupA;Zasp52
geneListName	hocomoco__GATA3_MOUSE.H10MO.C	3.52	0.0654	grn (inferredBy_Orthology).	CycT; pnr (inferredBy_MotifSimilarity_n_Orthology).	328	4351	aay;Ac3;AcCoAS;Ace;Act57B;Act88F;ade3;ade5;AhcyL2;Aldh;alpha-Est9;Amy-p;Ance;Ank2;Aplip1;arg;Argk;ATP8B;bab2;Bace;beat-IIIb;betaTry;bt;btsz;by;Cad74A;CadN;caix;CanA1;CAP;cbt;CG10311;CG10512;CG10513;CG10514;CG10562;CG10947;CG10960;CG11147;CG11200;CG1136;CG1139;CG11459;CG11912;CG1208;CG12194;CG12290;CG12512;CG13905;CG14245;CG14688;CG14963;CG14964;CG14989;CG1532;CG1544;CG15533;CG1640;CG16820;CG16836…
geneListName	cisbp__M0269	3.51	0.0654		Atf3 (inferredBy_MotifSimilarity).Atf6; CrebB; Jra (inferredBy_MotifSimilarity_n_Orthology).	120	1500	Ace;Act88F;Adck;Ank2;arg;Argk;Arr1;bab2;Bace;boss;by;CadN;CAP;CBP;Cbp53E;cbt;CG10311;CG10513;CG10514;CG10659;CG10663;CG10737;CG10960;CG1136;CG11409;CG12290;CG14989;CG1648;CG16965;CG2082;CG2269;CG30281;CG3036;CG31140;CG31547;CG3267;CG33181;CG34398;CG40498;CG42390;CG42540;CG42784;CG42808;CG4335;CG4341;CG43729;CG43778;CG44085;CG44153;CG4461;CG45057;CG4741;CG5023;CG5065;CG5177;CG5639;CG5800;CG6084;CG…
geneListName	transfac_pro__M07411	3.50	0.0653		NfI (inferredBy_MotifSimilarity).Nf1 (inferredBy_MotifSimilarity_n_Orthology).	60	603	Ace;Act57B;beat-IIIb;btsz;CadN;CAP;Cbp53E;CG10311;CG1640;CG17124;CG18208;CG18304;CG31663;CG34114;CG34357;CG42322;CG42390;CG42492;CG42540;CG42784;CG43729;CG44153;CG4721;CG5023;CG5707;CG6746;CG6767;CG9850;comm3;Cow;cpo;DOR;Dscam2;Ect4;Fife;fru;haf;Invadolysin;Ktl;Lip2;Mal-B2;mbl;Mf;Mhc;Mob2;nAChRalpha1;NetB;Pax;Prm;Reg-2;salr;Sema2b;SERCA;Shab;side;SLC22A;sqa;Syn;tn;zormin
geneListName	cisbp__M0562	3.49	0.0653			294	4839	18SrRNA-Psi:CR41602;Ac3;AcCoAS;Ace;Act57B;Act87E;Act88F;AdSL;AhcyL2;Aldh;alpha-Est9;Amy-p;Ance;Ank2;Aplip1;Appl;arg;Argk;Arr1;Arr2;atk;ATP8B;bab2;bt;btsz;by;Cad74A;CadN;caix;CanA1;CAP;Cbp53E;cbt;CG10311;CG10512;CG10513;CG10514;CG10562;CG10663;CG10737;CG10947;CG10960;CG11147;CG11200;CG1136;CG11658;CG11796;CG11892;CG12116;CG12194;CG12290;CG13124;CG13607;CG14153;CG14234;CG14834;CG14964;CG14989;CG153…
geneListName	cisbp__M0416	3.49	0.0653	sr (inferredBy_Orthology).	klu (inferredBy_MotifSimilarity).	61	577	btsz;CadN;CAP;cbt;CG10311;CG10659;CG10960;CG1136;CG14989;CG17386;CG2082;CG2269;CG31140;CG33258;CG34114;CG34357;CG34398;CG42322;CG42540;CG42784;CG43102;CG43897;CG44085;CG44153;CG5023;CG5177;CG6746;CG9850;Cngl;Dscam2;Ect4;fru;Gad1;haf;Hr38;IA-2;Invadolysin;Mal-A6;mbl;Mf;Mid1;Mp20;MTF-1;nAChRalpha1;nAChRbeta1;NetB;Pax;Ptr;Rim;Sema2b;Shab;Slc45-1;sNPF;Syn;tim;tn;Tsp;up;VGlut;wupA;Zasp66
geneListName	cisbp__M0789	3.48	0.0652			73	760	Ank2;Appl;arg;Argk;bab2;btsz;CAP;CG10960;CG13124;CG14963;CG14964;CG14989;CG1946;CG31140;CG34357;CG34398;CG40498;CG42492;CG42540;CG42784;CG43078;CG43729;CG44153;CG45002;CG5800;CG5958;CG5973;CG9752;comm3;cpo;Cpr67B;DOR;Dscam2;dsx;Ect4;fbp;Fife;fru;Gad1;haf;hll;Hr38;jdp;mbl;Mhc;Mlc1;Mp20;Msr-110;nAChRalpha1;nAChRbeta1;Nckx30C;Nrx-1;nwk;Pa1;phu;PIP5K59B;Rab3;Rbp9;Rim;RyR;Sema2b;Shab;sli;Snap25;Syn;Sy…
geneListName	cisbp__M0437	3.46	0.0651	CG16779 (inferredBy_Orthology).		94	1082	AcCoAS;Ace;Appl;arg;Argk;bab2;bt;btsz;by;CadN;CG13124;CG13607;CG14820;CG14989;CG1648;CG1695;CG1946;CG2269;CG31140;CG34114;CG3556;CG42492;CG42540;CG42784;CG4301;CG43078;CG43102;CG4341;CG43897;CG44085;CG45002;CG45076;CG45078;CG5177;CG5758;CG5800;CG7910;CG8547;CG9391;CG9813;Cngl;cpo;Cpr67B;Cyp12b2;Dscam2;dsx;eas;Eip75B;Etf-QO;Fife;Flo2;Frq1;fru;Gad1;hll;Hr38;IA-2;jdp;l(2)01289;mbl;Mf;mfas;Mhc;Mid1;M…
geneListName	jaspar__MA0609.1	3.46	0.0651	CrebB (inferredBy_Orthology).	vri (inferredBy_MotifSimilarity_n_Orthology).	86	971	Ace;Ank2;Argk;bab2;boss;by;CadN;CAP;cbt;CG10311;CG10512;CG10659;CG10737;CG10960;CG1136;CG12290;CG14989;CG16965;CG30281;CG31140;CG31547;CG3267;CG33181;CG33203;CG34398;CG3961;CG42540;CG42784;CG43729;CG43778;CG44085;CG5023;CG5065;CG5639;CG5973;CG5991;CG6767;CG8740;CG9331;CG9850;cpo;Cyp4e3;DOR;dpr12;Dscam2;Ect4;Eip75B;Flo2;Frq1;fru;Gad1;Gale;Gk2;GLS;Got2;haf;hiw;Hr38;IA-2;jp;l(2)01289;mbl;Men;Mf;Mhc;…
geneListName	cisbp__M3314	3.45	0.0650	grn (inferredBy_Orthology).	pnr (inferredBy_MotifSimilarity_n_Orthology).	347	4962	18SrRNA-Psi:CR41602;aay;Ac3;AcCoAS;Ace;Act88F;ade3;AhcyL2;Aldh;alpha-Est9;Amy-p;Ance;Ank2;Appl;arg;Argk;Arr1;atk;ATP8B;bab2;Bace;bmm;btsz;by;Cad74A;CadN;Cadps;caix;CanA1;CAP;CBP;Cbp53E;cbt;CG10311;CG10477;CG10512;CG10513;CG10514;CG10559;CG10562;CG10799;CG1090;CG10960;CG11200;CG1139;CG11409;CG11459;CG11739;CG11892;CG11912;CG1208;CG12116;CG12194;CG12290;CG12374;CG12512;CG13607;CG13905;CG14245;CG149…
geneListName	transfac_public__M00114	3.44	0.0649	CrebB (inferredBy_Orthology).		63	594	Ace;Ank2;arg;Argk;bab2;beat-IIIb;boss;by;CadN;CAP;Cbp53E;cbt;CG10663;CG10947;CG11658;CG14989;CG3036;CG31140;CG34114;CG34398;CG42784;CG43102;CG45076;CG5023;CG5065;CG8654;CG9747;CG9850;cpo;DOR;dpr12;dsx;Ect4;Eip75B;Esyt2;Frq1;fru;Gad1;Gnmt;haf;IA-2;mbl;Mdr49;Mhc;Mlc1;Mob2;Msr-110;NetB;nrv2;Nrx-1;Pax;Sema2b;Shab;side;sli;sqa;Syn;Syt4;tutl;VGlut;Zasp52;Zasp66;zormin
geneListName	c2h2_zfs__M0415	3.44	0.0649	CG16779 (inferredBy_Orthology).		96	1114	AcCoAS;Ace;Appl;arg;Argk;bab2;bt;btsz;by;CadN;CG13124;CG13607;CG14820;CG14989;CG1648;CG1695;CG1946;CG2269;CG31140;CG34114;CG3556;CG42492;CG42540;CG42784;CG4301;CG43078;CG43102;CG4341;CG43897;CG44085;CG45002;CG45076;CG45078;CG5177;CG5639;CG5758;CG5800;CG7910;CG8036;CG8547;CG9391;CG9813;Cngl;cpo;Cpr67B;Cyp12b2;Dscam2;dsx;eas;Eip75B;Etf-QO;Fife;Flo2;Frq1;fru;Gad1;hll;Hr38;IA-2;jdp;l(2)01289;mbl;Mf;m…
geneListName	transfac_public__M00128	3.43	0.0648	grn (inferredBy_Orthology).	pnr (inferredBy_MotifSimilarity_n_Orthology).	264	3346	aay;Ac3;AcCoAS;Ace;ade3;AhcyL2;Aldh;alpha-Est9;Amy-p;Ance;Ank2;Appl;arg;Argk;atk;ATP8B;bab2;Bace;btsz;by;Cad74A;CadN;caix;CAP;CBP;cbt;CG10311;CG10512;CG10513;CG10514;CG10559;CG10562;CG10799;CG10960;CG11200;CG1139;CG11409;CG11459;CG1208;CG12194;CG12290;CG12374;CG12512;CG13607;CG13905;CG14245;CG14963;CG14964;CG14989;CG1544;CG15533;CG16820;CG16965;CG17027;CG17124;CG17571;CG17752;CG18208;CG18417;CG18…
geneListName	transfac_public__M00260	3.43	0.0648	CG7786; Pdp1; gt (inferredBy_Orthology).	vri (inferredBy_MotifSimilarity).	75	794	Act88F;AdSL;Appl;arg;Argk;CG10737;CG1136;CG12290;CG12512;CG14820;CG14989;CG1648;CG17124;CG18304;CG18547;CG1907;CG2781;CG33203;CG34114;CG34398;CG3556;CG3902;CG42492;CG42784;CG43078;CG4341;CG43729;CG4666;CG4825;CG5065;CG5639;CG5758;CG6543;CG7781;CG8654;CG8740;CG8861;CG9331;CG9747;CG9850;CG9990;CheA7a;Clect27;Cow;cpo;DOR;Eip75B;Frq1;fru;Gad1;grk;haf;Hr38;IA-2;IRSp53;mbl;Mhc;Mid1;Mlc2;Mob2;Msr-110;nA…
geneListName	hocomoco__CREB1_HUMAN.H10MO.A	3.42	0.0648	CrebB (inferredBy_Orthology).	Atf-2; Atf3; Atf6; CG44247; CrebA; Jra; kay (inferredBy_MotifSimilarity).Xbp1 (inferredBy_MotifSimilarity_n_Orthology).	49	456	Ace;bab2;boss;by;CAP;cbt;CG10311;CG10659;CG10737;CG10960;CG1136;CG11409;CG12290;CG14989;CG30281;CG3036;CG31140;CG34398;CG42784;CG43729;CG43778;CG44085;CG5023;CG5639;CG8740;CG9331;cpo;dpr12;Eip75B;Flo2;fru;Gad1;Gale;GLS;Hr38;IA-2;IRSp53;mbl;Mf;Mob2;Nplp1;Prat2;Rim;Shab;sNPF;Syn;tn;wupA;Zasp52
geneListName	cisbp__M0271	3.40	0.0647		CrebB; tj (inferredBy_MotifSimilarity_n_Orthology).	119	1309	Ace;Adck;arg;Argk;Arr1;atl;boss;btsz;by;CadN;CAP;cbt;CG10311;CG10512;CG10513;CG10514;CG10659;CG10737;CG1090;CG10947;CG10960;CG11147;CG1136;CG11409;CG14989;CG1648;CG16820;CG16965;CG17386;CG2082;CG2781;CG30281;CG31140;CG31345;CG31547;CG34126;CG34398;CG3556;CG40498;CG42540;CG42784;CG42808;CG43078;CG4335;CG43729;CG43778;CG44085;CG44153;CG45057;CG4741;CG5023;CG5065;CG5177;CG6767;CG8303;CG8547;CG8654;C…
geneListName	elemento__GAGCCCC	3.40	0.0647			83	871	Ace;Act88F;bab2;CadN;caix;CanA1;cbt;CG10512;CG10960;CG11147;CG1136;CG11796;CG13607;CG14688;CG14989;CG1532;CG1674;CG18208;CG18404;CG2017;CG30015;CG3036;CG33258;CG34114;CG34398;CG3597;CG3902;CG40498;CG42322;CG42540;CG42784;CG4335;CG4462;CG5065;CG5639;CG5800;CG6767;CG7910;CG8036;CG8740;CG8861;Clect27;Cow;cpo;Cyp4e3;Cyp6w1;Cyt-b5-r;dsx;Ect4;Eip75B;Etf-QO;FASN2;Fife;frma;fru;Hr38;jdp;Ktl;Mf;Mhc;Mid1;n…
geneListName	swissregulon__sacCer__GLN3	3.40	0.0646	GATAd; GATAe; grn; pnr; srp (inferredBy_Orthology).		363	4994	aay;Ac3;AcCoAS;Ace;Act57B;ade2;ade3;ade5;AhcyL2;Aldh;alpha-Est9;alphaTry;Amy-p;Ance;Ank2;Appl;Arc1;arg;Argk;Arr1;atk;atl;ATP8B;bab2;Bace;beat-IIIb;bmm;btsz;by;Cad74A;CadN;caix;CanA1;CAP;CBP;Cbp53E;cbt;CG10062;CG10283;CG10311;CG10477;CG10559;CG10562;CG10799;CG1090;CG10947;CG10960;CG11149;CG11200;CG1136;CG11459;CG11739;CG11892;CG11912;CG12057;CG1208;CG12116;CG12290;CG12374;CG12512;CG13607;CG13905;C…
geneListName	transfac_pro__M02756	3.40	0.0646	pnr (inferredBy_Orthology).	GATAd; GATAe; grn; srp (inferredBy_MotifSimilarity_n_Orthology).	321	4450	aay;Ac3;AcCoAS;Ace;Act88F;ade2;ade3;ade5;AhcyL2;Aldh;alpha-Est9;Amy-p;Ance;Ank2;arg;Argk;Arr1;atk;atl;ATP8B;bab2;Bace;bmm;btsz;by;CadN;caix;CAP;CBP;cbt;CG10062;CG10283;CG10477;CG10512;CG10559;CG10562;CG10799;CG10947;CG10960;CG11149;CG11200;CG1136;CG11459;CG11658;CG11739;CG11912;CG1208;CG12116;CG12194;CG12290;CG12374;CG12512;CG13607;CG13659;CG13905;CG14820;CG14963;CG14964;CG1544;CG1640;CG16820;CG1…
geneListName	scertf__morozov.MGA1	3.39	0.0646			321	4837	18SrRNA-Psi:CR41602;aay;Ac3;AcCoAS;Ace;Act57B;Act87E;Act88F;AdSL;AhcyL2;Aldh;Ance;Ank2;arg;Argk;Arr2;AsnS;Atg18b;atk;atl;ATP8B;bab2;beat-IIIb;bt;btsz;by;Cad74A;CadN;caix;CanA1;CAP;Cbp53E;cbt;CG10283;CG10311;CG10513;CG10514;CG10550;CG10737;CG1090;CG10960;CG11200;CG1136;CG11459;CG1208;CG12116;CG12290;CG12950;CG13124;CG13607;CG13905;CG14153;CG1416;CG14820;CG14964;CG14989;CG1532;CG1544;CG1648;CG1673;…
geneListName	swissregulon__sacCer__CST6	3.38	0.0645		Atf3 (inferredBy_MotifSimilarity).CrebB; Jra (inferredBy_MotifSimilarity_n_Orthology).	57	562	Ace;Argk;boss;by;CAP;cbt;CG10311;CG10659;CG10737;CG10960;CG1136;CG12290;CG16965;CG30281;CG31140;CG31547;CG33181;CG34398;CG3902;CG42784;CG43078;CG43729;CG43778;CG44085;CG5023;CG5065;CG5639;CG5800;CG6767;CG8740;CG9990;comm3;Cyp4e3;dpr12;Dscam2;Ect4;Eip75B;Flo2;fru;GLS;Got2;Hr38;IA-2;jp;Mf;Mid1;Mob2;nAChRalpha1;nolo;Nrx-1;Prat2;Sema2b;sNPF;Syn;wupA;Zasp52;zormin
geneListName	transfac_pro__M07733	3.38	0.0645	srp (directAnnotation).	grn (inferredBy_MotifSimilarity).GATAd; GATAe; pnr (inferredBy_MotifSimilarity_n_Orthology).	322	4184	aay;Ac3;AcCoAS;Ace;ade3;ade5;AdSL;AhcyL2;Aldh;alpha-Est9;Amy-p;Ance;Ank2;Appl;arg;Argk;atl;bab2;Bace;betaTry;bmm;btsz;by;CadN;caix;CAP;CBP;Cbp53E;cbt;CG10062;CG10311;CG10513;CG10514;CG10559;CG10562;CG10799;CG10947;CG10960;CG11149;CG11200;CG1136;CG1139;CG11409;CG11739;CG11912;CG1208;CG12116;CG12194;CG12290;CG12374;CG12512;CG13905;CG14245;CG14688;CG14963;CG14964;CG14989;CG1544;CG15533;CG1640;CG1673…
geneListName	cisbp__M0330	3.36	0.0644			72	723	AcCoAS;arg;Argk;Arr1;btsz;CadN;cbt;CG10512;CG10513;CG10514;CG10737;CG10947;CG10960;CG1674;CG2118;CG30015;CG31140;CG33203;CG34398;CG3902;CG3961;CG42784;CG4341;CG43729;CG4607;CG5065;CG5991;CG9850;CG9990;Cngl;comm3;Cow;cpo;dpr12;Ect4;Eip75B;Fife;fru;Gk2;hiw;Hr38;IRSp53;jp;l(2)01289;LysP;Men;Mhc;Mid1;Mlc1;Mlc2;nAChRbeta1;Nckx30C;NetB;nrv2;nwk;Pax;rdgC;RIC-3;SdhC;Sema2b;side;sqa;Syn;Syn2;Syngr;Tsp;tut…
geneListName	yetfasco__YER045C_8	3.36	0.0644		REPTOR-BP (inferredBy_MotifSimilarity).CrebB (inferredBy_MotifSimilarity_n_Orthology).	112	1324	aay;Ace;Act88F;Adck;Ank2;AQP;Argk;bab2;boss;by;CAP;CBP;Cbp53E;cbt;CG10311;CG10659;CG10737;CG10947;CG10960;CG1136;CG12290;CG14989;CG16965;CG18208;CG30015;CG30281;CG31140;CG3267;CG33181;CG34398;CG3556;CG3902;CG3961;CG42390;CG42540;CG42784;CG42808;CG43729;CG43778;CG44085;CG44153;CG45002;CG4741;CG5023;CG5065;CG5639;CG5800;CG6084;CG6767;CG8654;CG8740;CG9331;CG9747;CG9850;CG9990;Cngl;comm3;cpo;Cpr65Au;…
geneListName	taipale_tf_pairs__JUN_ATGACGTCAT_HT	3.36	0.0644	Jra (inferredBy_Orthology).		144	1836	Ace;Act88F;Adck;alpha-Est9;Ank2;AQP;arg;Argk;bab2;Bace;boss;btsz;by;CadN;CAP;CBP;Cbp53E;cbt;CG10311;CG10659;CG10663;CG10737;CG1090;CG10960;CG1136;CG12290;CG13124;CG14245;CG14989;CG1544;CG15533;CG1648;CG16965;CG18135;CG18208;CG2082;CG2269;CG30281;CG3036;CG31140;CG31522;CG31547;CG3267;CG33181;CG34109;CG34114;CG34398;CG3556;CG3902;CG40498;CG42390;CG42540;CG42784;CG42808;CG4335;CG43729;CG43778;CG4408…
geneListName	flyfactorsurvey__Cf2-PB_SOLEXA_FBgn0000286	3.35	0.0643	Cf2 (directAnnotation).		67	698	AcCoAS;Appl;arg;Argk;bab2;CAP;CG14989;CG1648;CG1695;CG31140;CG3556;CG42492;CG42540;CG4301;CG43078;CG43102;CG43897;CG44085;CG45002;CG45076;CG45078;CG5177;CG5800;Cngl;cpo;Cpr67B;Cyp12b2;Dscam2;dsx;eas;Etf-QO;Fife;Flo2;Frq1;Gad1;Hr38;IA-2;l(2)01289;mbl;Mf;mfas;Mhc;Mid1;Mlc1;Mlc2;Mp20;nAChRalpha1;Nckx30C;NetB;Nrx-1;nwk;phu;Prm;Rab3;Rim;salr;SERCA;Shab;Sik2;sli;Syn2;Taldo;tn;tutl;up;wupA;Zasp66
geneListName	cisbp__M0275	3.35	0.0643		Atf-2; Atf3; Atf6; CG44247; CrebA; Jra; crc; kay (inferredBy_MotifSimilarity).CrebB; Xbp1 (inferredBy_MotifSimilarity_n_Orthology).	48	449	Ace;Ank2;Argk;by;CadN;cbt;CG10311;CG10737;CG10960;CG12290;CG14989;CG16965;CG1907;CG31140;CG31547;CG33181;CG34398;CG42784;CG43729;CG43778;CG44085;CG5023;CG5065;CG5639;CG8740;cpo;Cyp4e3;Eip75B;Flo2;fru;Gad1;Gk2;GLS;Hr38;IA-2;jp;mbl;Mf;Mob2;nAChRalpha1;Nckx30C;Nplp1;Prat2;Rim;Shab;tn;wupA;Zasp52
geneListName	homer__AGATAASR_GATA3	3.34	0.0642	grn (inferredBy_Orthology).	srp (inferredBy_MotifSimilarity).pnr (inferredBy_MotifSimilarity_n_Orthology).	328	4342	aay;Ac3;AcCoAS;Ace;ade3;ade5;AhcyL2;Aldh;alpha-Est9;alphaTry;Amy-p;Ance;Ank2;Appl;arg;Argk;atl;bab2;Bace;betaTry;bmm;btsz;by;CadN;caix;CanA1;CAP;cbt;CG10170;CG10477;CG10513;CG10514;CG10559;CG10562;CG10947;CG10960;CG11200;CG1136;CG1139;CG11409;CG11459;CG11658;CG11912;CG1208;CG12194;CG12290;CG12374;CG12512;CG13905;CG13947;CG14245;CG14820;CG14963;CG14964;CG14989;CG1532;CG1544;CG15533;CG16820;CG17124…
geneListName	cisbp__M0319	3.32	0.0641	CrebB (inferredBy_Orthology).	vri (inferredBy_MotifSimilarity_n_Orthology).	86	964	Ace;Ank2;Argk;Arr1;bab2;boss;by;CadN;CAP;cbt;CG10311;CG10512;CG10659;CG10737;CG10960;CG1136;CG12290;CG14989;CG16965;CG30281;CG31140;CG31547;CG3267;CG33181;CG33203;CG34398;CG3961;CG42540;CG42784;CG43729;CG43778;CG44085;CG5023;CG5065;CG5639;CG5973;CG5991;CG6767;CG8740;CG9331;CG9850;cpo;Cyp4e3;DOR;dpr12;Dscam2;Ect4;Eip75B;Flo2;fru;Gad1;Gale;Gk2;GLS;Got2;haf;hiw;Hr38;IA-2;jp;l(2)01289;mbl;Men;Mf;Mhc;…
geneListName	hocomoco__GATA4_HUMAN.H10MO.B	3.32	0.0641	pnr (inferredBy_Orthology).	grn (inferredBy_MotifSimilarity_n_Orthology).	355	4947	aay;Ac3;AcCoAS;Ace;Act57B;Act88F;ade3;ade5;AhcyL2;Aldh;alpha-Est9;Amy-p;Ance;Ank2;Aplip1;Appl;arg;Argk;Atg18b;atk;ATP8B;bab2;Bace;betaTry;boss;btsz;by;CadN;caix;CanA1;CAP;CBP;cbt;CG10062;CG10311;CG10512;CG10513;CG10514;CG10550;CG10562;CG10947;CG10960;CG11147;CG11200;CG1139;CG11409;CG11459;CG11912;CG12194;CG12290;CG12512;CG13124;CG13659;CG13905;CG13947;CG14245;CG14688;CG14963;CG14964;CG14989;CG154…
geneListName	cisbp__M3084	3.31	0.0641	CrebB (inferredBy_Orthology).		30	208	bab2;by;CadN;cbt;CG10737;CG10960;CG11409;CG14989;CG31140;CG34398;CG42784;CG43729;CG43778;CG44085;CG5023;CG5177;CR43417;Dscam2;fru;Gad1;Gale;GLS;Hr38;IA-2;mbl;Mf;Nckx30C;salr;tn;wupA
geneListName	transfac_pro__M07034	3.31	0.0641	CrebB (inferredBy_Orthology).		59	572	Ace;Act88F;Argk;bab2;boss;by;CAP;cbt;CG10659;CG10737;CG10960;CG1136;CG11409;CG12290;CG14989;CG16965;CG30281;CG31140;CG31547;CG34398;CG42540;CG42784;CG42808;CG43078;CG43729;CG43778;CG44085;CG5023;CG5639;CG5800;CG6767;CG8740;CG9331;CG9850;comm3;cpo;DOR;dpr12;Dscam2;Eip75B;Flo2;Gad1;GLS;Got2;Hr38;IA-2;mbl;Mf;Mob2;pgant4;Prat2;Rim;Sema2b;Shab;sNPF;Syn;wupA;Zasp52;zormin
geneListName	cisbp__M6253	3.31	0.0641	grn (inferredBy_Orthology).	CycT; GATAd; GATAe; HLH3B; Sirt6; pnr; srp (inferredBy_MotifSimilarity_n_Orthology).	332	4301	aay;Ac3;AcCoAS;Ace;Act88F;ade2;ade3;ade5;AhcyL2;Aldh;alpha-Est9;Amy-p;Ance;Ank2;Appl;arg;Argk;atk;atl;bab2;Bace;betaTry;bmm;btsz;by;CadN;caix;CAP;CBP;cbt;CG10311;CG10477;CG10512;CG10513;CG10514;CG10562;CG10799;CG10947;CG10960;CG11200;CG11409;CG11459;CG11658;CG11739;CG11912;CG1208;CG12116;CG12194;CG12290;CG12374;CG12512;CG13607;CG13659;CG13905;CG14245;CG14963;CG14964;CG14989;CG1532;CG1544;CG15533;…
geneListName	bergman__srp	3.31	0.0640	srp (directAnnotation).	GATAd; GATAe; grn; pnr (inferredBy_MotifSimilarity_n_Orthology).	318	4505	aay;Ac3;AcCoAS;Ace;ade3;ade5;AdSL;AhcyL2;Aldh;alpha-Est9;Amy-p;Ance;Ank2;Appl;arg;Argk;AsnS;atk;bab2;Bace;btsz;by;Cad74A;CadN;caix;CAP;CBP;cbt;CG10062;CG10283;CG10513;CG10514;CG10559;CG10562;CG10737;CG10799;CG1090;CG10947;CG10960;CG11147;CG11200;CG1136;CG11409;CG11459;CG11672;CG11739;CG11912;CG12057;CG1208;CG12194;CG12290;CG12374;CG12512;CG14245;CG14688;CG14820;CG14989;CG1532;CG1544;CG15533;CG157…
geneListName	taipale__RARA_full_RGGTCANNNARRGGTCA	3.29	0.0639		Hr78 (inferredBy_MotifSimilarity).Hr3; usp (inferredBy_MotifSimilarity_n_Orthology).	294	4486	18SrRNA-Psi:CR41602;Ac3;Ace;Act88F;ade3;ade5;alpha-Est9;Ank2;Appl;Arc1;arg;Argk;Arr2;Atg18b;atk;atl;ATP8B;bab2;Bace;beat-IIIb;bt;btsz;CadN;Cadps;CAP;Cbp53E;cbt;CG10062;CG10170;CG10283;CG10311;CG10512;CG10550;CG10659;CG10960;CG11147;CG11200;CG11658;CG12950;CG13659;CG14989;CG1532;CG1544;CG15533;CG15765;CG1648;CG16820;CG17124;CG17323;CG17386;CG17571;CG17896;CG18208;CG18304;CG18404;CG18547;CG1909;CG1…
geneListName	transfac_pro__M07574	3.29	0.0639		Atf3; Atf6; CrebA; CrebB; Jra; REPTOR-BP (inferredBy_MotifSimilarity).	89	1002	Ace;Act88F;Ank2;Argk;bab2;Bace;boss;by;CadN;CAP;cbt;CG10311;CG10659;CG10663;CG10737;CG10960;CG1136;CG11409;CG12290;CG13124;CG14989;CG15533;CG1648;CG2082;CG2269;CG30281;CG3036;CG31140;CG33181;CG34398;CG42390;CG42540;CG42784;CG42808;CG43729;CG43778;CG44085;CG45057;CG5023;CG5065;CG5639;CG6084;CG6767;CG8547;CG8740;CG8907;CG9331;CG9886;cpo;Cpr65Au;Cpr67B;Desat1;DOR;dpr12;Dscam2;Ect4;Eip75B;Esyt2;Fife;…
geneListName	transfac_pro__M04618	3.28	0.0638			136	1692	AcCoAS;Ace;Act57B;Act87E;Act88F;Ank2;Appl;arg;Argk;Arr1;bab2;btsz;by;CadN;CanA1;CAP;CG10311;CG10737;CG10960;CG1136;CG11672;CG13124;CG14964;CG14989;CG1648;CG1695;CG17124;CG17752;CG1946;CG2269;CG2765;CG31140;CG31345;CG31522;CG32486;CG33181;CG34109;CG34114;CG34398;CG42390;CG42492;CG42540;CG42784;CG4301;CG43078;CG43102;CG4341;CG43729;CG43897;CG44085;CG44153;CG45002;CG45076;CG45078;CG5177;CG5758;CG580…
geneListName	cisbp__M5662	3.28	0.0638	NfI (inferredBy_Orthology).	C15; Nf1 (inferredBy_MotifSimilarity_n_Orthology).	54	514	Act57B;Argk;beat-IIIb;btsz;CadN;CAP;Cbp53E;CG10311;CG17124;CG18208;CG18304;CG2082;CG34114;CG34357;CG42390;CG42492;CG42540;CG42784;CG44153;CG5023;CG5707;CG6746;CG6767;CG7720;CG9850;comm3;Cow;cpo;DOR;Dscam2;Eaat2;Ect4;Eip75B;Fife;haf;Invadolysin;Ktl;l(2)01289;Lip2;Mal-B2;mbl;Mf;Mob2;nAChRalpha1;NetB;Pax;Prm;qvr;Sema2b;side;SLC22A;Syn;tn;zormin
geneListName	predrem__nrMotif1930	3.26	0.0637			155	1991	Ac3;AcCoAS;Ace;Aldh;alpha-Est9;Amy-p;Ank2;Appl;arg;Argk;bab2;beat-IIIb;bt;btsz;by;CadN;CAP;CG10283;CG10311;CG10960;CG1136;CG11459;CG11658;CG12290;CG13124;CG13607;CG14964;CG14989;CG1695;CG18208;CG1946;CG2082;CG2765;CG2781;CG3036;CG31140;CG31547;CG31663;CG33181;CG34114;CG34398;CG3597;CG3961;CG40498;CG42540;CG42784;CG4341;CG43729;CG43778;CG44153;CG45002;CG45076;CG45078;CG5023;CG5065;CG5177;CG5612;CG…
geneListName	transfac_public__M00245	3.26	0.0637	sr (inferredBy_Orthology).	klu (inferredBy_MotifSimilarity).	50	476	btsz;CadN;CAP;CG10311;CG10659;CG1136;CG13124;CG14989;CG2269;CG31140;CG34398;CG42322;CG42540;CG42784;CG4341;CG43729;CG43778;CG43897;CG44153;CG5023;CG5177;Cngl;Dscam2;Ect4;Eip75B;Fife;Flo2;fru;Gad1;IA-2;Mal-A6;mbl;Mp20;MTF-1;nAChRalpha1;nAChRbeta1;NetB;Ptr;Shab;side;sNPF;tim;Tm2;tn;Tsp;up;wupA;Zasp52;Zasp66;zormin
geneListName	cisbp__M3178	3.26	0.0637	sr (inferredBy_Orthology).	klu (inferredBy_MotifSimilarity).	51	487	btsz;CadN;CAP;CG10311;CG10659;CG1136;CG13124;CG14989;CG2269;CG31140;CG34398;CG42322;CG42540;CG42784;CG43102;CG4341;CG43729;CG43778;CG43897;CG44153;CG5023;CG5177;Cngl;Dscam2;Ect4;Eip75B;Fife;Flo2;fru;Gad1;IA-2;Mal-A6;mbl;Mp20;MTF-1;nAChRalpha1;nAChRbeta1;NetB;Ptr;Shab;side;sNPF;tim;Tm2;tn;Tsp;up;wupA;Zasp52;Zasp66;zormin
geneListName	cisbp__M6256	3.26	0.0637	pnr (inferredBy_Orthology).	grn (inferredBy_MotifSimilarity_n_Orthology).	351	4897	aay;Ac3;AcCoAS;Ace;Act88F;ade3;ade5;AhcyL2;Aldh;alpha-Est9;Amy-p;Ance;Ank2;Aplip1;Appl;arg;Argk;Atg18b;atk;ATP8B;bab2;Bace;beat-IIIb;betaTry;boss;btsz;by;CadN;caix;CanA1;CAP;CBP;cbt;CG10062;CG10311;CG10512;CG10513;CG10514;CG10550;CG10562;CG10947;CG10960;CG11147;CG11149;CG11200;CG1139;CG11409;CG11459;CG11912;CG12194;CG12290;CG12512;CG13124;CG13659;CG13905;CG13947;CG14245;CG14688;CG14963;CG14964;CG…
geneListName	cisbp__M4595	3.25	0.0637	grn (inferredBy_Orthology).	HLH3B; pnr (inferredBy_MotifSimilarity_n_Orthology).	352	4926	aay;Ac3;AcCoAS;Ace;Act88F;ade3;ade5;AhcyL2;Aldh;alpha-Est9;Amy-p;Ance;Ank2;Appl;arg;Argk;Atg18b;atk;atl;ATP8B;bab2;Bace;betaTry;bmm;btsz;by;CadN;caix;CAP;CBP;cbt;CG10361;CG10477;CG10512;CG10513;CG10514;CG10559;CG10562;CG10799;CG10947;CG10960;CG11147;CG11200;CG11409;CG11459;CG11658;CG11912;CG1208;CG12194;CG12290;CG12512;CG13607;CG13659;CG13905;CG13947;CG14245;CG14820;CG14963;CG14964;CG14989;CG1532…
geneListName	cisbp__M5667	3.25	0.0636	NfI (inferredBy_Orthology).		45	416	Act57B;beat-IIIb;btsz;CadN;CAP;Cbp53E;CG10311;CG17124;CG18208;CG18304;CG2082;CG34114;CG34357;CG42390;CG42492;CG42540;CG42784;CG5023;CG5707;CG6767;CG7720;CG9850;comm3;Cow;cpo;Dscam2;Eip75B;Fife;haf;IA-2;Invadolysin;Ktl;Lip2;Mal-B2;mbl;Mf;Mob2;nAChRalpha1;Pax;Prm;Sema2b;SERCA;side;Syn;tn
geneListName	taipale__GATA3_full_AGATAANN	3.24	0.0636	grn (inferredBy_Orthology).	pnr; srp (inferredBy_MotifSimilarity).CycT; GATAd; GATAe; HLH3B; Sirt6 (inferredBy_MotifSimilarity_n_Orthology).	348	4944	aay;Ac3;AcCoAS;Ace;ade3;ade5;AhcyL2;Aldh;alpha-Est9;Amy-p;Ance;Ank2;Appl;Arc1;arg;Argk;atl;ATP8B;bab2;Bace;betaTry;bmm;btsz;by;Cad74A;CadN;caix;CanA1;CAP;cbt;CG10062;CG10170;CG10283;CG10477;CG10513;CG10514;CG10559;CG10562;CG10947;CG10960;CG11149;CG11200;CG1136;CG1139;CG11409;CG11459;CG11658;CG11739;CG11912;CG1208;CG12194;CG12290;CG12374;CG12512;CG13905;CG14205;CG14245;CG14820;CG14963;CG14964;CG14…
geneListName	cisbp__M4622	3.24	0.0636	grn (inferredBy_Orthology).	CycT; GATAd; GATAe; HLH3B; pnr; srp (inferredBy_MotifSimilarity_n_Orthology).	359	4909	aay;Ac3;AcCoAS;Ace;Act88F;ade2;ade3;ade5;AhcyL2;Aldh;alpha-Est9;Amy-p;Ance;Ank2;Appl;arg;Argk;atk;atl;ATP8B;bab2;Bace;betaTry;bmm;btsz;by;CadN;caix;CAP;CBP;Cbp53E;cbt;CG10062;CG10311;CG10361;CG10477;CG10512;CG10513;CG10514;CG10562;CG10799;CG10947;CG10960;CG11200;CG11409;CG11459;CG11658;CG11739;CG11912;CG1208;CG12116;CG12194;CG12290;CG12512;CG13607;CG13659;CG13905;CG13947;CG14245;CG14820;CG14963;C…
geneListName	transfac_pro__M07572	3.24	0.0636		Atf-2; Atf3; Atf6; CG44247; CrebA; CrebB; Jra; REPTOR-BP; cnc; crc; kay (inferredBy_MotifSimilarity).Xbp1 (inferredBy_MotifSimilarity_n_Orthology).	102	1223	Ace;Adck;alpha-Est9;Ank2;Argk;bab2;Bace;boss;by;CadN;CAP;CBP;cbt;CG10311;CG10659;CG10663;CG10737;CG10960;CG1136;CG12290;CG13124;CG14989;CG1544;CG15533;CG1648;CG18208;CG2082;CG30281;CG3036;CG31140;CG3267;CG33181;CG34398;CG42390;CG42540;CG42784;CG42808;CG43729;CG43778;CG44085;CG44153;CG45002;CG45057;CG4741;CG5023;CG5065;CG5639;CG6084;CG6767;CG8547;CG8740;CG8907;CG9331;CG9886;CG9990;cpo;Cpr65Au;Cpr6…
geneListName	predrem__nrMotif2366	3.24	0.0636			91	1058	AcCoAS;AdSL;Ank2;arg;bab2;CadN;CAP;CG10513;CG10514;CG10737;CG1136;CG12290;CG16965;CG18208;CG1946;CG30015;CG3036;CG3097;CG31345;CG31547;CG31663;CG33181;CG3376;CG34198;CG34398;CG3556;CG42322;CG42784;CG43078;CG43102;CG4335;CG43729;CG44153;CG45002;CG5687;CG5800;CG7720;CG8303;CG8740;CG9702;CG9747;CG9850;CG9864;Clect27;cpo;Cpr47Ef;CR43417;Cyp12b2;DOR;egr;Fife;Fkbp14;fru;Gad1;Gale;hig;Hr38;IA-2;IRSp53;j…
geneListName	taipale__JDP2_DBD_NATGACGTCAYN	3.23	0.0635		Atf-2; Atf3; Atf6; CG44247; CrebA; CrebB; Jra; REPTOR-BP; crc; kay (inferredBy_MotifSimilarity).Xbp1 (inferredBy_MotifSimilarity_n_Orthology).	65	686	Ace;Ank2;Argk;bab2;boss;by;CAP;cbt;CG10659;CG10737;CG10960;CG1136;CG12290;CG13124;CG14989;CG1544;CG1648;CG18208;CG2082;CG30281;CG31140;CG34398;CG42540;CG42784;CG43729;CG43778;CG44085;CG45057;CG5023;CG6767;CG8547;CG8740;CG9331;CG9886;CG9990;cpo;Cpr67B;DOR;dpr12;Eip75B;Esyt2;Fife;Flo2;fru;Gad1;GLS;haf;Hr38;IA-2;jp;mbl;Mf;Mid1;Mob2;Nplp1;Prat2;Rim;RpLP0-like;Shab;side;sNPF;tn;wupA;Zasp52;zormin
geneListName	cisbp__M6073	3.23	0.0635		ERR; Hr3; svp (inferredBy_MotifSimilarity_n_Orthology).	69	736	AcCoAS;ade3;Aldh;alpha-Est9;Ank2;boss;CadN;cbt;CG10960;CG11147;CG1136;CG14989;CG17124;CG17386;CG18208;CG18547;CG1946;CG2187;CG2269;CG32694;CG3534;CG40498;CG42784;CG4335;CG43778;CG44153;CG5023;CG5707;CG6084;CG6660;CG7720;CG8036;CG8861;CG9993;Clect27;Cow;cpo;Cpr47Ef;Cyp6w1;Dscam2;Ect4;Eip75B;Fatp;Fife;Fkbp14;fru;Gad1;Got1;haf;IA-2;mbl;Men;Mlc1;nAChRalpha1;Nckx30C;NetB;Nipsnap;Ptr;salt;SdhB;Sema2b;s…
geneListName	cisbp__M5660	3.23	0.0635	NfI (inferredBy_Orthology).	C15; Nf1 (inferredBy_MotifSimilarity_n_Orthology).	43	379	Act57B;beat-IIIb;btsz;CadN;CAP;Cbp53E;CG10311;CG17124;CG18208;CG18304;CG2082;CG34114;CG34357;CG42390;CG42540;CG42784;CG5023;CG5707;CG6767;CG9850;comm3;Cow;cpo;Dscam2;Ect4;Eip75B;Fife;haf;Invadolysin;Ktl;Lip2;Mal-B2;mbl;Mf;Mob2;nAChRalpha1;Pax;Prm;Sema2b;side;SLC22A;Syn;tn
geneListName	taipale__EGR2_DBD_MCGCCCACGCA	3.22	0.0634	sr (inferredBy_Orthology).	klu (inferredBy_MotifSimilarity).	39	336	btsz;CadN;CAP;CG10659;CG14989;CG2269;CG34398;CG42322;CG42540;CG42784;CG43729;CG44153;CG5023;CG5177;Cngl;Dscam2;Eip75B;Fife;Flo2;fru;Gad1;haf;IA-2;mbl;Mid1;Mp20;MTF-1;nAChRalpha1;NetB;Ptr;Shab;side;sNPF;tim;tn;Tsp;wupA;Zasp66;zormin
geneListName	hocomoco__GATA1_HUMAN.H10MO.S	3.21	0.0634	grn (inferredBy_Orthology).	CycT; GATAd; GATAe; HLH3B; Sirt6; pnr; srp (inferredBy_MotifSimilarity_n_Orthology).	359	4870	aay;Ac3;AcCoAS;Ace;Act88F;ade2;ade3;ade5;AhcyL2;Aldh;alpha-Est9;Amy-p;Ance;Ank2;Appl;arg;Argk;atk;atl;bab2;Bace;betaTry;bmm;btsz;by;CadN;caix;CAP;CBP;Cbp53E;cbt;CG10311;CG10477;CG10512;CG10513;CG10514;CG10562;CG10799;CG10947;CG10960;CG11200;CG11409;CG11459;CG11658;CG11739;CG11912;CG1208;CG12116;CG12194;CG12290;CG12374;CG12512;CG13607;CG13659;CG13905;CG13947;CG14245;CG14820;CG14963;CG14964;CG14989…
geneListName	cisbp__M5516	3.21	0.0634	CG7786; Pdp1; gt (inferredBy_Orthology).	hng1; vri (inferredBy_MotifSimilarity).	247	3798	18SrRNA-Psi:CR41602;Act88F;Adck;AdSL;AhcyL2;Aldh;alpha-Est9;Amy-p;Ank2;Appl;arg;Argk;Arr2;atk;bab2;beat-IIIb;boss;bt;btsz;by;Cad74A;CadN;caix;CAP;CBP;Cbp53E;cbt;Cdk5alpha;CG10283;CG10311;CG10359;CG10512;CG10513;CG10514;CG10663;CG10737;CG1090;CG10932;CG10947;CG10960;CG11147;CG1136;CG11409;CG11835;CG1208;CG12099;CG12290;CG12512;CG14757;CG14820;CG14989;CG1640;CG1648;CG16820;CG17124;CG17386;CG17896;C…
geneListName	transfac_public__M00113	3.21	0.0633	CrebB (inferredBy_Orthology).		37	295	Ace;bab2;boss;by;CadN;cbt;CG10737;CG10960;CG11409;CG14989;CG31140;CG34398;CG42784;CG43729;CG43778;CG44085;CG5023;CG5065;CG5177;CG8303;cpo;CR43417;Dscam2;Eip75B;fru;Gad1;Gale;GLS;Hr38;IA-2;mbl;Mf;Nckx30C;nwk;salr;tn;wupA
geneListName	hocomoco__CREB5_HUMAN.H10MO.D	3.20	0.0633		Atf-2; Atf3; Atf6; CG44247; CG6272; CrebA; CrebB; Jra; REPTOR-BP; crc; kay (inferredBy_MotifSimilarity).Xbp1 (inferredBy_MotifSimilarity_n_Orthology).	239	3583	18SrRNA-Psi:CR41602;aay;Ace;Act57B;Act88F;Adck;ade3;AdSL;AhcyL2;Aldh;alpha-Est9;Ance;Ank2;Aplip1;AQP;Arc1;arg;Argk;ATP8B;bab2;Bace;beat-IIIb;boss;btsz;by;CadN;caix;CAP;CBP;Cbp53E;cbt;CG10170;CG10311;CG10359;CG10512;CG10513;CG10514;CG10659;CG10663;CG10737;CG1090;CG10947;CG10960;CG1136;CG11409;CG11459;CG11658;CG12290;CG13124;CG14245;CG14688;CG14989;CG1544;CG15531;CG15533;CG1640;CG1648;CG16820;CG169…
geneListName	taipale__HLF_full_NRTTACGTAAYN	3.20	0.0633	CG7786; Pdp1; gt (inferredBy_Orthology).	hng1; vri (inferredBy_MotifSimilarity).	84	940	Act88F;Ank2;arg;Argk;Arr2;bab2;CG10737;CG10932;CG10960;CG1136;CG12290;CG12512;CG14989;CG17124;CG18304;CG18547;CG1907;CG2781;CG30015;CG31523;CG33203;CG34109;CG34114;CG34398;CG3902;CG42319;CG42492;CG42784;CG43078;CG43102;CG4341;CG43729;CG43778;CG43897;CG44153;CG4825;CG5065;CG5599;CG5639;CG6543;CG7280;CG7781;CG8740;CG8861;CG9331;CG9747;CG9850;CG9990;Clect27;Cow;cpo;DOR;Eip75B;Etf-QO;eys;fru;Gad1;grk…
geneListName	homer__ATGACGTCATCN_JunD	3.20	0.0633	Jra (inferredBy_Orthology).	Atf-2; Atf3; Atf6; CG44247; CrebA; CrebB; cnc; crc; kay (inferredBy_MotifSimilarity).Xbp1 (inferredBy_MotifSimilarity_n_Orthology).	154	2107	Ace;Adck;alpha-Est9;Ank2;Arc1;arg;Argk;ATP8B;bab2;Bace;boss;btsz;by;CadN;caix;CAP;CBP;Cbp53E;cbt;CG10311;CG10359;CG10659;CG10663;CG10737;CG1090;CG10960;CG1136;CG11409;CG12290;CG13124;CG14245;CG14989;CG1544;CG15533;CG1648;CG16965;CG18135;CG18208;CG2082;CG2269;CG30015;CG30281;CG3036;CG31140;CG31522;CG31547;CG32354;CG32486;CG3267;CG33181;CG34109;CG34398;CG3961;CG40498;CG42390;CG42540;CG42784;CG42808…
geneListName	predrem__nrMotif2227	3.19	0.0633			50	463	AcCoAS;arg;ATP8B;bab2;CadN;CAP;CG1090;CG14820;CG18208;CG3036;CG31523;CG31663;CG32486;CG34126;CG34398;CG42540;CG4341;CG43778;CG43897;CG45002;CG4607;CG7720;CG8654;CG8740;CG9990;dpr12;Fife;Frq1;fru;hig;Hr38;mbl;Mf;Mid1;nAChRalpha1;nSyb;Obp56g;Prm;Rab3;Rbp9;Rim;Sema2b;side;Slc45-1;sqa;Syn;Syn2;Syt4;VGlut;wry
geneListName	cisbp__M1269	3.19	0.0632			53	517	Ace;Ank2;Appl;by;Cad74A;CadN;CAP;CG14989;CG17386;CG18208;CG3097;CG31140;CG33110;CG42492;CG43078;CG4335;CG43729;CG4721;CG5973;CG7720;CG8740;CG9498;CG9850;CG9990;CheA7a;Cngl;cpo;Dscam2;dsx;Eip75B;Fife;fru;GstO3;Hr38;jp;lama;Mal-A3;mbl;Mid1;Mlp84B;nAChRalpha1;nAChRbeta1;Nckx30C;nSyb;nwk;side;sli;Snmp2;sqa;Syn;up;yellow-b;Zasp52
geneListName	taipale_tf_pairs__HOXB2_PAX9_NNMATTAGTCACGCWTSRNTG_CAP	3.19	0.0632	Poxm; pb (inferredBy_Orthology).		31	234	boss;CadN;CG10737;CG16965;CG2082;CG31663;CG34114;CG42540;CG43078;CG4341;CG45057;CG7720;CG8654;CG9780;CG9864;CG9990;Cngl;cpo;dpr12;eys;fru;haf;Invadolysin;Mp20;Pax;SCOT;side;sli;tn;VGlut;wupA
geneListName	cisbp__M3315	3.19	0.0632	grn (inferredBy_Orthology).		338	4967	aay;Ac3;AcCoAS;Ace;ade2;ade3;ade5;AhcyL2;Aldh;alpha-Est9;alpha-Man-IIa;Ance;Ank2;Appl;arg;Argk;Atg18b;atk;atl;ATP8B;bab2;Bace;btsz;by;Cad74A;CadN;caix;CanA1;CAP;CBP;Cbp53E;cbt;CG10170;CG10311;CG10512;CG10513;CG10514;CG10562;CG1090;CG10947;CG10960;CG11200;CG1136;CG11459;CG11658;CG11912;CG1208;CG12116;CG12194;CG12290;CG13124;CG13659;CG13905;CG14245;CG14820;CG14963;CG14964;CG14989;CG1532;CG1544;CG15…
geneListName	elemento__CAAGTTCA	3.19	0.0632			146	1866	18SrRNA-Psi:CR41602;AcCoAS;Ace;Act57B;Ank2;Argk;Arr2;btsz;by;CadN;CAP;cbt;CG10283;CG10311;CG10359;CG10663;CG10960;CG11672;CG11796;CG1208;CG13124;CG14688;CG14834;CG16820;CG17124;CG17386;CG17571;CG18208;CG2187;CG2781;CG30015;CG31140;CG31522;CG32354;CG3267;CG33110;CG34114;CG34398;CG3902;CG3961;CG4000;CG42390;CG42492;CG42540;CG42784;CG43078;CG43102;CG43394;CG4341;CG43729;CG43897;CG44085;CG44153;CG450…
geneListName	hocomoco__NR5A2_HUMAN.H10MO.C	3.17	0.0631	ftz-f1 (inferredBy_Orthology).	ERR (inferredBy_MotifSimilarity_n_Orthology).	124	1604	Ac3;Ace;Aldh;alpha-Est9;Argk;Arr2;atk;beat-IIIb;boss;by;CadN;caix;CBP;Cbp53E;cbt;CG10283;CG10737;CG10947;CG10960;CG11147;CG1136;CG14834;CG15765;CG17124;CG17571;CG18135;CG18208;CG2017;CG2187;CG2781;CG30015;CG31140;CG31345;CG31522;CG31523;CG32549;CG33110;CG33181;CG34109;CG34114;CG3556;CG40498;CG42322;CG42784;CG43078;CG43394;CG4341;CG43729;CG43897;CG44085;CG44153;CG45002;CG45057;CG5023;CG5758;CG5973…
geneListName	predrem__nrMotif150	3.17	0.0631			60	638	Act88F;Arr2;btsz;CadN;Cbp53E;CG10283;CG10311;CG10947;CG10960;CG14688;CG14834;CG18208;CG2781;CG30015;CG31140;CG34109;CG34114;CG34398;CG42540;CG42784;CG4341;CG44153;CG5023;CG5758;CG7695;CG8861;CG9119;Clect27;Cngl;Cow;cpo;dpr12;Ect4;egr;Eip75B;eys;Fife;Fkbp14;Flo2;fru;Gale;glob1;haf;Hr38;jdp;Mlp84B;Mob2;nAChRalpha1;NetB;Obp56d;Pax;Prat2;Prm;Ptr;Rim;RyR;Shab;wry;Zasp66;zormin
geneListName	transfac_public__M00179	3.17	0.0631		Atf6; CrebB (inferredBy_MotifSimilarity_n_Orthology).	155	2057	AcCoAS;Ace;Adck;alpha-Est9;Appl;arg;Argk;bab2;Bace;boss;btsz;by;CadN;CAP;Cbp53E;cbt;CG10170;CG10311;CG10512;CG10513;CG10514;CG10659;CG10663;CG10737;CG10947;CG10960;CG11147;CG1136;CG11409;CG12290;CG14245;CG14989;CG1544;CG15533;CG1640;CG1648;CG16820;CG17124;CG17386;CG2017;CG2082;CG2781;CG30015;CG30281;CG3036;CG31140;CG31522;CG31547;CG3267;CG34114;CG34126;CG34398;CG3823;CG3902;CG40498;CG42390;CG4254…
geneListName	elemento__ATGACGTC	3.16	0.0630		Atf-2; CG44247; CrebA; kay (inferredBy_MotifSimilarity).	43	374	Ace;Ank2;Argk;by;CadN;cbt;CG10737;CG10960;CG11409;CG14989;CG3036;CG31140;CG31547;CG33181;CG34398;CG4335;CG43729;CG43778;CG44085;CG5065;CG6767;CG6910;CG8740;cpo;Cyp4e3;Eip75B;Flo2;fru;Gad1;GLS;Hr38;jp;mbl;Mf;Mob2;nAChRalpha1;Nplp1;Rim;Shab;Tig;tn;wupA;Zasp52
geneListName	cisbp__M6254	3.16	0.0630	grn (inferredBy_Orthology).	CycT; HLH3B; pnr (inferredBy_MotifSimilarity_n_Orthology).	351	4998	aay;Ac3;AcCoAS;Ace;Act88F;ade3;ade5;AhcyL2;Aldh;alpha-Est9;Amy-p;Ance;Ank2;Appl;arg;Argk;atk;atl;bab2;Bace;betaTry;boss;btsz;by;CadN;caix;CAP;Cbp53E;cbt;CG10062;CG10311;CG10477;CG10512;CG10513;CG10514;CG10562;CG10663;CG10737;CG10947;CG10960;CG11147;CG1136;CG1139;CG11409;CG11459;CG1208;CG12116;CG12194;CG12290;CG12374;CG12512;CG13905;CG14245;CG14688;CG14963;CG14964;CG14989;CG1532;CG1544;CG15533;CG1…
geneListName	hocomoco__NR6A1_HUMAN.H10MO.B	3.15	0.0630	Hr4 (inferredBy_Orthology).	ERR; ftz-f1; usp (inferredBy_MotifSimilarity_n_Orthology).	65	670	Ace;alpha-Est9;Argk;cbt;CG10512;CG14834;CG16820;CG17124;CG17386;CG17571;CG18208;CG2781;CG31140;CG31345;CG33181;CG34114;CG34398;CG3902;CG3961;CG42784;CG43102;CG44085;CG44153;CG45002;CG45057;CG5023;CG5973;CG8654;CG8740;CG9780;CG9850;CG9990;CheA7a;Clect27;DOR;Dscam2;dsx;Eaat2;Ect4;Eip75B;Fatp;Fife;Flo2;fru;haf;Hr38;IA-2;LKRSDH;LManVI;Mal-A3;Mf;mfas;Nrx-1;Pax;Rh6;RyR;Sema2b;side;Snmp2;sNPF;Syngr;tn;V…
geneListName	taipale__Jdp2_DBD_NATGACGTCAYN	3.15	0.0630		Atf-2; Atf3; Atf6; CG44247; CrebA; CrebB; Jra; REPTOR-BP; crc; kay (inferredBy_MotifSimilarity).Xbp1 (inferredBy_MotifSimilarity_n_Orthology).	68	717	Ace;Ank2;Argk;bab2;boss;by;CAP;cbt;CG10311;CG10659;CG10737;CG10960;CG1136;CG12290;CG13124;CG14989;CG1544;CG1648;CG18208;CG2082;CG30281;CG31140;CG34398;CG42540;CG42784;CG42808;CG43729;CG43778;CG44085;CG45057;CG5023;CG6767;CG8547;CG8740;CG8907;CG9331;CG9886;CG9990;cpo;Cpr67B;DOR;dpr12;Eip75B;Esyt2;Fife;Flo2;fru;Gad1;GLS;haf;Hr38;IA-2;jp;mbl;Mf;Mid1;Mob2;Nplp1;Prat2;Rim;RpLP0-like;Shab;side;sNPF;Tep…
geneListName	cisbp__M6397	3.15	0.0630	Hr4 (inferredBy_Orthology).	ERR; ftz-f1; usp (inferredBy_MotifSimilarity_n_Orthology).	63	652	Ace;alpha-Est9;Argk;cbt;CG10512;CG14834;CG16820;CG17124;CG17386;CG17571;CG18208;CG2781;CG31140;CG31345;CG34114;CG34398;CG3902;CG3961;CG42784;CG43102;CG44085;CG44153;CG45002;CG45057;CG5023;CG5973;CG8654;CG8740;CG9780;CG9850;CG9990;CheA7a;Clect27;DOR;Dscam2;dsx;Eaat2;Ect4;Eip75B;Fatp;Fife;Flo2;fru;haf;Hr38;IA-2;LKRSDH;LManVI;Mal-A3;Mf;mfas;Nrx-1;Pax;Rh6;RyR;side;Snmp2;sNPF;Syngr;tn;VGlut;Zasp52;Zas…
geneListName	taipale__ESRRA_DBD_SAAGGTCANNTSAAGGTCA_repr	3.15	0.0630	ERR (inferredBy_Orthology).	Hr3; ftz-f1 (inferredBy_MotifSimilarity_n_Orthology).	131	1679	AcCoAS;Ace;Act87E;ade3;Aldh;Ank2;ATP8B;bab2;beat-IIIb;btsz;by;CadN;Cadps;CAP;CG10170;CG10283;CG10960;CG11409;CG12290;CG13905;CG14989;CG15765;CG1648;CG17124;CG17386;CG18208;CG18547;CG1907;CG1946;CG2082;CG2187;CG2269;CG30015;CG3036;CG33110;CG33181;CG34114;CG34357;CG40498;CG42540;CG42541;CG42784;CG4335;CG4341;CG43729;CG43778;CG44153;CG45002;CG45057;CG5023;CG5639;CG5707;CG5867;CG5973;CG6287;CG6660;CG…
geneListName	taipale__CREB3_full_NNRTGACGTCAYCN	3.15	0.0630		Atf-2; Atf3; Atf6; CG44247; CrebA; CrebB; Jra; kay (inferredBy_MotifSimilarity).Xbp1 (inferredBy_MotifSimilarity_n_Orthology).	63	607	Ace;Ank2;Argk;bab2;boss;by;CadN;CAP;cbt;CG10311;CG10659;CG10737;CG10960;CG1136;CG11409;CG12290;CG14989;CG1544;CG1648;CG2082;CG30281;CG31140;CG34398;CG42540;CG42808;CG43729;CG43778;CG44085;CG44153;CG45057;CG5023;CG5639;CG8740;cpo;Cyp4e3;DOR;dpr12;Dscam2;Eip75B;Esyt2;eys;Fife;Flo2;fru;Gad1;Gale;GLS;Hr38;IA-2;mbl;Mf;Mob2;Nplp1;Prat2;Rim;RpLP0-like;Shab;sNPF;Syn;tn;wupA;Zasp52;zormin
geneListName	factorbook__GATA1	3.15	0.0629	grn (inferredBy_Orthology).	CycT; GATAd; GATAe; HLH3B; Sirt6; pnr; srp (inferredBy_MotifSimilarity_n_Orthology).	354	4784	aay;Ac3;AcCoAS;Ace;Act88F;ade2;ade3;ade5;AhcyL2;Aldh;alpha-Est9;Amy-p;Ance;Ank2;Appl;arg;Argk;atk;atl;ATP8B;bab2;Bace;betaTry;bmm;btsz;by;CadN;caix;CAP;CBP;Cbp53E;cbt;CG10062;CG10311;CG10477;CG10512;CG10513;CG10514;CG10562;CG10799;CG10947;CG10960;CG11200;CG11409;CG11459;CG11658;CG11739;CG11912;CG1208;CG12116;CG12194;CG12290;CG12512;CG13607;CG13659;CG13905;CG13947;CG14245;CG14820;CG14963;CG14964;C…
geneListName	cisbp__M5477	3.15	0.0629	grn (inferredBy_Orthology).	pnr; srp (inferredBy_MotifSimilarity).CycT; GATAd; GATAe; HLH3B; Sirt6 (inferredBy_MotifSimilarity_n_Orthology).	346	4926	aay;Ac3;AcCoAS;Ace;ade3;ade5;AhcyL2;Aldh;alpha-Est9;Amy-p;Ance;Ank2;Appl;Arc1;arg;Argk;atl;ATP8B;bab2;Bace;betaTry;bmm;btsz;by;Cad74A;CadN;caix;CanA1;CAP;cbt;CG10062;CG10170;CG10283;CG10477;CG10513;CG10514;CG10559;CG10562;CG10947;CG10960;CG11149;CG11200;CG1136;CG1139;CG11409;CG11459;CG11658;CG11739;CG11912;CG1208;CG12194;CG12290;CG12374;CG12512;CG13905;CG14205;CG14245;CG14820;CG14963;CG14964;CG14…
geneListName	cisbp__M3393	3.14	0.0629	CG7786; Pdp1; gt (inferredBy_Orthology).	vri (inferredBy_MotifSimilarity).	62	647	Appl;arg;Argk;CG10737;CG1136;CG12290;CG12512;CG14820;CG14989;CG1648;CG18304;CG18547;CG1907;CG33203;CG34398;CG3556;CG3902;CG42492;CG42784;CG43078;CG4341;CG43729;CG4666;CG4825;CG5639;CG5758;CG6543;CG7781;CG8654;CG8740;CG8861;CG9850;CG9990;CheA7a;Clect27;Cow;cpo;DOR;Eip75B;Frq1;fru;Gad1;grk;Hr38;IA-2;IRSp53;Mhc;Mid1;Mob2;Msr-110;nAChRalpha1;Nckx30C;nrv2;Scsalpha;SdhC;Shab;side;sqa;tutl;VGlut;wupA;Za…
geneListName	cisbp__M5412	3.14	0.0629	ERR (inferredBy_Orthology).	ftz-f1 (inferredBy_MotifSimilarity_n_Orthology).	265	3911	18SrRNA-Psi:CR41602;Ac3;Ace;Act57B;Adck;AhcyL2;alpha-Est9;Ank2;Appl;arg;Arr2;Atg18b;ATP8B;bab2;Bace;beat-IIIb;boss;bt;btsz;by;CadN;caix;CanA1;CAP;Cbp53E;cbt;Cdk5alpha;CG10283;CG10311;CG10361;CG10737;CG1090;CG10947;CG10960;CG11147;CG1136;CG11409;CG11658;CG12290;CG12512;CG12950;CG13124;CG13905;CG13947;CG1416;CG14688;CG14757;CG1532;CG1544;CG15765;CG1648;CG1674;CG16820;CG1695;CG17323;CG17386;CG17571;…
geneListName	cisbp__M5367	3.14	0.0628	sr (inferredBy_Orthology).	klu (inferredBy_MotifSimilarity).	43	363	btsz;CadN;CAP;cbt;CG10659;CG14989;CG2269;CG34398;CG42322;CG42540;CG42784;CG43729;CG43897;CG44153;CG5023;CG5177;Cngl;cpo;Dscam2;Eip75B;Fife;Flo2;fru;Gad1;haf;IA-2;Mal-A6;mbl;Mid1;Mp20;MTF-1;nAChRalpha1;NetB;Ptr;Shab;side;sNPF;tim;tn;Tsp;wupA;Zasp66;zormin
geneListName	taipale__JDP2_full_NATGACGTCAYN	3.13	0.0628		Atf-2; Atf3; Atf6; CG44247; CrebA; CrebB; Jra; REPTOR-BP; crc; kay (inferredBy_MotifSimilarity).Xbp1 (inferredBy_MotifSimilarity_n_Orthology).	112	1387	Ace;alpha-Est9;Ank2;Argk;ATP8B;bab2;boss;btsz;by;CadN;caix;CAP;CBP;cbt;CG10311;CG10359;CG10659;CG10663;CG10737;CG1090;CG10960;CG1136;CG12290;CG13124;CG14245;CG14989;CG1544;CG15533;CG1648;CG18208;CG2082;CG2269;CG30281;CG3036;CG31140;CG31522;CG31547;CG3267;CG33181;CG34398;CG40498;CG42540;CG42784;CG42808;CG43729;CG43778;CG44085;CG44153;CG45002;CG45057;CG5023;CG5065;CG5639;CG6767;CG8547;CG8740;CG8907…
geneListName	homer__CGGTGACGTCAC_CRE	3.13	0.0628		Atf3; CrebA (inferredBy_MotifSimilarity).CrebB; E2f1 (inferredBy_MotifSimilarity_n_Orthology).	70	759	Ace;Adck;Argk;bab2;boss;by;CAP;cbt;CG10311;CG10659;CG10960;CG1136;CG11409;CG12290;CG14989;CG1648;CG16965;CG30281;CG31140;CG34398;CG42540;CG42784;CG42808;CG43729;CG44153;CG45002;CG4741;CG5023;CG5639;CG6767;CG7720;CG8740;CG9331;CG9850;Cngl;cpo;Desat1;DOR;dpr12;Dscam2;Eip75B;eys;Flo2;Fmo-2;fru;Gad1;Gale;Gk2;GLS;Hr38;IA-2;jp;mbl;Mf;Mob2;nAChRalpha1;NetB;nolo;Nplp1;Prat2;Rab3;Rim;Shab;side;sNPF;Syn;Tm…
geneListName	predrem__nrMotif965	3.13	0.0628			68	729	Ace;AhcyL2;Aldh;Ank2;arg;Argk;CadN;CG10311;CG12194;CG12290;CG1544;CG18208;CG2082;CG2765;CG31522;CG3267;CG33258;CG34398;CG3902;CG42390;CG43729;CG5065;CG5177;CG5639;CG7409;CG7966;CG8630;CG9391;CG9850;chp;Cngl;cpo;Cpr67B;Cyp12b2;egr;Eip75B;Etf-QO;Fife;fru;haf;Hsp83;jp;mbl;Mf;Mlp84B;nAChRbeta1;Nckx30C;NetB;nolo;nSyb;nwk;PIP5K59B;Prm;qvr;Rim;RyR;Sema2b;Shab;Slc45-1;sli;Snap25;sqa;Syn2;Syt4;Tm2;Tsp;Ugt…
geneListName	cisbp__M5763	3.12	0.0627		Hr78 (inferredBy_MotifSimilarity).Hr3; usp (inferredBy_MotifSimilarity_n_Orthology).	190	2568	AcCoAS;Ace;Act88F;ade3;ade5;Aldh;alpha-Est9;Ank2;Appl;arg;Argk;Arr2;atl;ATP8B;beat-IIIb;boss;btsz;CadN;caix;CAP;Cbp53E;cbt;CG10062;CG10283;CG10311;CG10512;CG10947;CG10960;CG11147;CG11200;CG1136;CG14989;CG1544;CG15765;CG1648;CG17124;CG17386;CG17571;CG18208;CG18547;CG1909;CG1946;CG2082;CG2187;CG2269;CG2781;CG3036;CG31091;CG31345;CG31522;CG32280;CG32549;CG32694;CG33110;CG34114;CG34398;CG3534;CG3842;…
geneListName	cisbp__M3088	3.11	0.0627		Atf6; CrebB (inferredBy_MotifSimilarity_n_Orthology).	98	1168	Ace;Adck;Argk;bab2;Bace;boss;by;CAP;Cbp53E;cbt;CG10170;CG10311;CG10659;CG10663;CG10947;CG10960;CG11147;CG1136;CG11409;CG12290;CG14245;CG14989;CG1640;CG17386;CG2781;CG30281;CG31140;CG31522;CG3267;CG34114;CG34126;CG34357;CG34398;CG3902;CG42390;CG42540;CG42784;CG42808;CG43778;CG44085;CG44153;CG4461;CG45002;CG4741;CG5023;CG5065;CG5639;CG6084;CG6767;CG8740;CG9331;CG9850;CG9990;comm3;Cow;cpo;Cpr65Au;De…
geneListName	cisbp__M5323	3.10	0.0626		Atf-2; Atf3; Atf6; CG44247; CrebA; CrebB; Jra; kay (inferredBy_MotifSimilarity).Xbp1 (inferredBy_MotifSimilarity_n_Orthology).	64	636	Ace;Ank2;Argk;bab2;boss;by;CadN;CAP;cbt;CG10311;CG10659;CG10737;CG10960;CG1136;CG11409;CG12290;CG14989;CG1544;CG1648;CG2082;CG30281;CG31140;CG34398;CG42540;CG42808;CG43729;CG43778;CG44085;CG44153;CG45057;CG5023;CG5639;CG8740;cpo;Cyp4e3;DOR;dpr12;Dscam2;Eip75B;Esyt2;eys;Fife;Flo2;fru;Gad1;Gale;GLS;Hr38;IA-2;mbl;Mf;Mob2;nAChRalpha1;Nplp1;Prat2;Rim;RpLP0-like;Shab;sNPF;Syn;tn;wupA;Zasp52;zormin
geneListName	transfac_pro__M06221	3.10	0.0626			286	4490	18SrRNA-Psi:CR41602;7B2;Ac3;AcCoAS;Ace;Act57B;Act88F;AhcyL2;alpha-Est9;Ance;Ank2;Appl;AQP;arg;Argk;Arr1;Atg18b;atl;ATP8B;bab2;beat-IIIb;bt;btsz;by;Cad74A;CadN;Cadps;CAP;cbt;Cdk5alpha;CG10170;CG10283;CG10311;CG10513;CG10514;CG10960;CG11147;CG1136;CG11409;CG11459;CG11658;CG11672;CG11892;CG12057;CG1208;CG12116;CG12290;CG13124;CG13905;CG14153;CG14688;CG14963;CG14964;CG14989;CG15201;CG1532;CG1544;CG16…
geneListName	cisbp__M1865	3.10	0.0626	fd64A (inferredBy_Orthology).		113	1395	AcCoAS;Ace;Act57B;Appl;arg;Argk;bab2;bt;btsz;by;CadN;CG10960;CG13124;CG13607;CG14820;CG14989;CG1648;CG1695;CG1946;CG2269;CG33203;CG33258;CG34114;CG3556;CG42322;CG42492;CG42540;CG42784;CG4301;CG43078;CG43102;CG4341;CG43897;CG44085;CG45002;CG45076;CG45078;CG5177;CG5639;CG5758;CG5800;CG7910;CG9391;CG9813;Cngl;cpo;Cpr67B;Cyp12b2;Dscam2;dsx;eas;Eip75B;Etf-QO;fbp;Fife;Flo2;Frq1;fru;Gad1;hll;Hr38;IA-2;k…
geneListName	hocomoco__HLF_HUMAN.H10MO.C	3.10	0.0626	CG7786; Pdp1; gt (inferredBy_Orthology).	vri (inferredBy_MotifSimilarity).	216	3102	AcCoAS;Act88F;AhcyL2;Ank2;Appl;arg;Argk;Arr2;atk;atl;ATP8B;bab2;beat-IIIb;boss;bt;btsz;Cad74A;CadN;caix;CAP;CBP;Cbp53E;cbt;CG10283;CG10311;CG10359;CG10512;CG10737;CG10932;CG10947;CG10960;CG1136;CG11409;CG11658;CG11892;CG12099;CG12290;CG12512;CG13905;CG14688;CG14757;CG14820;CG14989;CG15201;CG1640;CG1648;CG16820;CG17124;CG17386;CG17571;CG17896;CG18003;CG18208;CG18304;CG18547;CG1907;CG2082;CG2118;CG…
geneListName	cisbp__M2284	3.10	0.0626	pnr (inferredBy_Orthology).	CycT; HLH3B; grn (inferredBy_MotifSimilarity_n_Orthology).	342	4853	aay;Ac3;AcCoAS;Ace;Act88F;ade3;ade5;AhcyL2;Aldh;alpha-Est9;Amy-p;Ance;Ank2;Appl;arg;Argk;atk;atl;bab2;Bace;beat-IIIb;betaTry;bmm;btsz;by;CadN;caix;CAP;CBP;Cbp53E;cbt;CG10311;CG10477;CG10513;CG10514;CG10562;CG10799;CG10947;CG10960;CG11200;CG11409;CG11459;CG11658;CG11739;CG11912;CG1208;CG12116;CG12194;CG12290;CG12374;CG12512;CG13607;CG13905;CG13947;CG14245;CG14963;CG14964;CG14989;CG1532;CG1544;CG15…
geneListName	taipale__RARA_DBD_RGGTCANNNARRGGTCA_repr	3.10	0.0626		ERR; svp; usp (inferredBy_MotifSimilarity_n_Orthology).	227	3426	18SrRNA-Psi:CR41602;AcCoAS;Ace;Act88F;ade3;ade5;Aldh;alpha-Est9;Ank2;arg;Argk;Arr2;atl;ATP8B;beat-IIIb;bt;btsz;CadN;caix;CAP;CG10311;CG10550;CG10947;CG10960;CG11147;CG11200;CG1136;CG1208;CG12950;CG13905;CG14989;CG1532;CG1544;CG15533;CG15765;CG1648;CG1673;CG17124;CG17386;CG18208;CG18404;CG18547;CG1907;CG1909;CG1946;CG2082;CG2187;CG2781;CG30015;CG3011;CG3036;CG31091;CG31140;CG31345;CG31522;CG31523;…
geneListName	flyfactorsurvey__Cf2-PA_SOLEXA_FBgn0000286	3.09	0.0626	Cf2 (directAnnotation).		274	3784	7B2;AcCoAS;Ace;Act57B;Act87E;ade3;AdSL;alpha-Est9;Ance;Ank2;Appl;arg;Argk;Arr2;Atg18b;ATP8B;bab2;beat-IIIb;boss;bt;btsz;by;Cad74A;CadN;Cadps;caix;CAP;Cbp53E;cbt;CG10283;CG10311;CG10513;CG10514;CG10550;CG10562;CG1090;CG10960;CG11147;CG1136;CG1139;CG11672;CG11835;CG11892;CG1208;CG12290;CG12512;CG13124;CG13607;CG13905;CG14153;CG14989;CG1532;CG1544;CG1648;CG1673;CG16820;CG16836;CG1695;CG17124;CG17571…
geneListName	tiffin__TIFDMEM0000023	3.09	0.0625			74	805	Ace;Ank2;Appl;arg;caix;CG10947;CG12290;CG13124;CG15765;CG17124;CG18208;CG31663;CG32354;CG34109;CG34114;CG34357;CG34398;CG42390;CG42492;CG42540;CG42784;CG43078;CG4341;CG43729;CG44153;CG4607;CG5758;CG5800;CG7084;CG7720;CG9812;CG9850;Cngl;comm3;Cow;cpo;CR43417;dpr12;Dscam2;Eaat2;Ect4;Eip75B;Fife;fru;haf;Hr38;jp;l(2)01289;mbl;Men;Mhc;Mid1;Mlc1;nAChRalpha1;Nckx30C;nwk;Obp57a;Rim;Sema2b;side;Slc45-1;sN…
geneListName	cisbp__M0362	3.09	0.0625		Atf3; Atf6; CrebA; CrebB; Jra; REPTOR-BP; cnc; kay (inferredBy_MotifSimilarity).Xbp1 (inferredBy_MotifSimilarity_n_Orthology).	59	612	Ace;Act88F;Ank2;Argk;bab2;boss;by;CAP;cbt;CG10311;CG10737;CG10960;CG1136;CG11409;CG12290;CG14989;CG30281;CG3036;CG31140;CG31547;CG34398;CG42540;CG42784;CG43729;CG43778;CG44085;CG5023;CG5065;CG5177;CG5639;CG5800;CG8740;CG9331;CG9850;comm3;cpo;Eip75B;Flo2;fru;Gad1;Gk2;GLS;Hr38;IA-2;IRSp53;mbl;Mf;Mid1;Mob2;nAChRalpha1;Nplp1;Nrx-1;Prat2;Rim;Shab;Syn;Tm2;wupA;Zasp52
geneListName	cisbp__M6396	3.09	0.0625	ftz-f1 (inferredBy_Orthology).	ERR (inferredBy_MotifSimilarity_n_Orthology).	179	2568	Ac3;Ace;ade3;Aldh;alpha-Est9;Amy-p;Ank2;AQP;arg;Argk;Arr2;atk;bab2;beat-IIIb;boss;btsz;by;Cad74A;CadN;caix;CBP;Cbp53E;cbt;CG10283;CG10512;CG10737;CG10947;CG10960;CG11147;CG1136;CG11409;CG11658;CG14688;CG14834;CG15765;CG1695;CG17124;CG17386;CG17571;CG18135;CG18208;CG2017;CG2187;CG2781;CG30015;CG31140;CG31345;CG31522;CG31523;CG31547;CG31663;CG32549;CG33110;CG33127;CG33181;CG34109;CG34114;CG34398;CG…
geneListName	cisbp__M2297	3.08	0.0625		Mef2; rump (inferredBy_MotifSimilarity_n_Orthology).	85	842	Act57B;Ank2;atl;bab2;beat-IIIb;bt;btsz;CadN;caix;CanA1;CBP;Cbp53E;CG10663;CG10737;CG11658;CG14964;CG1673;CG18304;CG31140;CG33181;CG34398;CG3902;CG3999;CG42390;CG42540;CG43078;CG43102;CG4341;CG43729;CG43897;CG44085;CG45002;CG5065;CG5612;CG5867;CG7409;cpo;CR43417;dpr12;Ect4;Eip75B;Esyt2;eys;fbp;Flo2;GLS;haf;hig;Hr38;IA-2;inaD;jp;l(2)01289;Mal-A3;mbl;Men;Mhc;Mlc1;Mp20;MTF-1;Nckx30C;NetB;nSyb;Pax;Prm…
geneListName	homer__ATGACGTCATCC_c-Jun-CRE	3.08	0.0625		Atf-2; Atf3; Atf6; CG44247; CrebA; CrebB; Jra; crc; kay (inferredBy_MotifSimilarity).Xbp1 (inferredBy_MotifSimilarity_n_Orthology).	67	706	Ace;alpha-Est9;Ank2;Argk;bab2;by;CAP;cbt;CG10311;CG10659;CG10737;CG10960;CG1136;CG12290;CG13124;CG14989;CG1544;CG1648;CG18208;CG2082;CG31140;CG34398;CG42540;CG43729;CG43778;CG44085;CG45002;CG45057;CG5023;CG6767;CG8547;CG8740;CG8907;CG9990;cpo;Cpr67B;DOR;dpr12;Eip75B;Esyt2;Fife;Flo2;fru;Gad1;GLS;Hr38;IA-2;IRSp53;jp;mbl;Mf;Mob2;nemy;Nplp1;Prat2;Ptr;Rim;Shab;side;sNPF;Syn;Tig;tim;wupA;Zasp52;Zasp66;…
geneListName	jaspar__MA0497.1	3.08	0.0625		Mef2; rump (inferredBy_MotifSimilarity_n_Orthology).	81	825	Act57B;Ank2;atl;bab2;beat-IIIb;bt;btsz;CadN;caix;CanA1;CBP;Cbp53E;CG10663;CG10737;CG11658;CG14964;CG1673;CG18304;CG33181;CG34398;CG3902;CG3999;CG42390;CG42540;CG43078;CG43102;CG4341;CG43729;CG43897;CG44085;CG45002;CG5065;CG5612;CG5867;CG7409;cpo;CR43417;dpr12;Ect4;Eip75B;Esyt2;eys;fbp;Flo2;GLS;haf;hig;Hr38;IA-2;inaD;jp;l(2)01289;Mal-A3;mbl;Mhc;Mlc1;MTF-1;Nckx30C;NetB;nSyb;Pax;Prm;Ptr;RIC-3;Rim;RS…
geneListName	scertf__badis.CST6	3.07	0.0624		Atf3 (inferredBy_MotifSimilarity).CrebB; Jra (inferredBy_MotifSimilarity_n_Orthology).	57	609	Ace;Argk;boss;by;CAP;cbt;CG10311;CG10659;CG10737;CG10960;CG1136;CG12290;CG16965;CG30281;CG31140;CG31547;CG33181;CG34398;CG3902;CG42784;CG43078;CG43729;CG43778;CG44085;CG5023;CG5065;CG5639;CG5800;CG6767;CG8740;CG9990;comm3;Cyp4e3;dpr12;Dscam2;Ect4;Eip75B;Flo2;fru;GLS;Got2;Hr38;IA-2;jp;Mf;Mid1;Mob2;nAChRalpha1;nolo;Nrx-1;Prat2;Sema2b;sNPF;Syn;wupA;Zasp52;zormin
geneListName	transfac_pro__M01142	3.07	0.0624	ftz-f1 (inferredBy_Orthology).		76	885	Ace;alpha-Est9;Ank2;Argk;atk;boss;cbt;CG10512;CG10737;CG11147;CG14834;CG15765;CG17571;CG2017;CG2781;CG30015;CG3036;CG31522;CG33110;CG33181;CG34109;CG34114;CG34398;CG3556;CG40498;CG42784;CG43102;CG4335;CG43897;CG44085;CG44153;CG45002;CG45057;CG5023;CG5758;CG5973;CG6746;CG6910;CG8036;CG8654;CG8740;CG9780;CG9850;CG9990;Clect27;comm3;cpo;DOR;dpr12;drd;Dscam2;Ect4;Eip75B;Fatp;fru;Gad1;Hasp;jp;LKRSDH;m…
geneListName	transfac_pro__M07732	3.07	0.0624	pnr (directAnnotation).	GATAd; GATAe; grn; srp (inferredBy_MotifSimilarity_n_Orthology).	314	4173	aay;Ac3;AcCoAS;Ace;ade3;ade5;AhcyL2;Aldh;alpha-Est9;Amy-p;Ance;Ank2;Appl;arg;Argk;atk;atl;bab2;Bace;bmm;btsz;by;CadN;caix;CAP;CBP;cbt;CG10062;CG10477;CG10512;CG10513;CG10514;CG10559;CG10562;CG10799;CG10947;CG10960;CG11200;CG1136;CG11409;CG11459;CG11739;CG11912;CG1208;CG12194;CG12290;CG12374;CG12512;CG13905;CG14205;CG14245;CG14688;CG14963;CG14964;CG14989;CG1532;CG1544;CG15533;CG1673;CG16820;CG1696…
geneListName	transfac_pro__M07666	3.07	0.0624	Atf3 (directAnnotation).	Atf-2; Atf6; CG44247; CrebA; CrebB; Jra; REPTOR-BP; cnc; crc; kay (inferredBy_MotifSimilarity).E2f1; Xbp1 (inferredBy_MotifSimilarity_n_Orthology).	42	403	Ace;Act88F;Ank2;Argk;bab2;by;CAP;cbt;CG10737;CG10960;CG1136;CG12290;CG14989;CG1544;CG1648;CG30281;CG31140;CG34398;CG42540;CG42784;CG43729;CG44085;CG5023;CG8740;CG9331;cpo;dpr12;Eip75B;Fife;Flo2;Gad1;GLS;Hr38;IRSp53;Mf;Mob2;Nplp1;Rim;Shab;VGlut;Zasp52;zormin
geneListName	hocomoco__MEF2C_HUMAN.H10MO.C	3.07	0.0624		Mef2; rump (inferredBy_MotifSimilarity_n_Orthology).	171	2357	Ace;Act57B;Act87E;Act88F;Ank2;AQP;arg;Argk;atl;ATP8B;bab2;beat-IIIb;bt;btsz;by;CadN;caix;CanA1;CAP;CBP;Cbp53E;cbt;CG10311;CG10663;CG10737;CG1090;CG10947;CG1136;CG11658;CG11835;CG13124;CG13947;CG14964;CG15201;CG1673;CG16904;CG18208;CG18304;CG2082;CG30015;CG3036;CG31140;CG31523;CG32280;CG32486;CG33181;CG34114;CG34398;CG3902;CG3999;CG40498;CG42319;CG42390;CG42540;CG42784;CG43078;CG43102;CG4335;CG434…
geneListName	cisbp__M5409	3.07	0.0624	ERR (inferredBy_Orthology).		115	1392	AcCoAS;Act87E;Act88F;ade3;Aldh;alpha-Est9;Ank2;arg;btsz;by;CadN;Cbp53E;CG10170;CG10283;CG10960;CG11409;CG14989;CG15765;CG1648;CG17124;CG17386;CG18208;CG18547;CG1907;CG1946;CG2187;CG2781;CG30015;CG3036;CG33110;CG34114;CG34357;CG40498;CG42540;CG42784;CG4335;CG4341;CG43729;CG43778;CG44153;CG45002;CG45057;CG5023;CG5065;CG5707;CG6660;CG6746;CG6767;CG7084;CG7720;CG8036;CG8560;CG8630;CG8740;CG9119;CG933…
geneListName	cisbp__M6277	3.06	0.0623	CG7786; Pdp1; gt (inferredBy_Orthology).	vri (inferredBy_MotifSimilarity).	216	3109	AcCoAS;AhcyL2;Ank2;Appl;arg;Argk;Arr2;atk;atl;ATP8B;bab2;beat-IIIb;boss;bt;btsz;Cad74A;CadN;caix;CAP;CBP;Cbp53E;CG10283;CG10311;CG10359;CG10737;CG10932;CG10947;CG10960;CG1136;CG11409;CG11892;CG12099;CG12290;CG12512;CG13905;CG14757;CG14820;CG14989;CG15201;CG1640;CG1648;CG16820;CG17124;CG17386;CG17896;CG18003;CG18208;CG18304;CG18547;CG1907;CG1946;CG2082;CG2118;CG2187;CG2269;CG2765;CG2781;CG30015;CG…
geneListName	swissregulon__hs__CREB1.p2	3.04	0.0622	CrebB (inferredBy_Orthology).		75	827	18SrRNA-Psi:CR41602;Ace;atl;bab2;boss;btsz;by;CadN;caix;CAP;cbt;CG10659;CG10947;CG10960;CG1136;CG11409;CG14989;CG16965;CG1907;CG31140;CG31345;CG31547;CG42540;CG42784;CG43078;CG43729;CG43778;CG44085;CG4461;CG5023;CG5065;CG5177;CG5973;CG8303;CG8740;Clect27;cpo;Cpr65Au;CR43417;DOR;dpr12;Eip75B;Esyt2;eys;fru;Gad1;Gale;Gk2;GLS;haf;Hr38;IA-2;Lip2;mbl;Mf;Mlp84B;Mob2;nAChRalpha1;Nckx30C;NetB;Npc2b;Nplp1;…
geneListName	hocomoco__GATA6_HUMAN.H10MO.B	3.03	0.0622	pnr (inferredBy_Orthology).	CG10348; GATAd; GATAe; grn; ham; srp (inferredBy_MotifSimilarity_n_Orthology).	315	4478	aay;Ac3;AcCoAS;Ace;Act88F;ade3;AhcyL2;Aldh;alpha-Est9;Amy-p;Ance;Ank2;Appl;arg;Argk;atk;atl;bab2;Bace;betaTry;bmm;boss;btsz;by;Cad74A;CadN;caix;CAP;CBP;Cbp53E;cbt;CG10170;CG10311;CG10477;CG10512;CG10513;CG10514;CG10559;CG10562;CG10737;CG10799;CG10947;CG10960;CG11200;CG11658;CG11912;CG1208;CG12194;CG12290;CG12512;CG13607;CG13659;CG13905;CG14245;CG14820;CG14963;CG14964;CG14989;CG1532;CG1544;CG15533…
geneListName	transfac_public__M00178	3.02	0.0621	CrebB (inferredBy_Orthology).	Atf3 (inferredBy_MotifSimilarity).Atf6; Jra; tj (inferredBy_MotifSimilarity_n_Orthology).	52	506	Ace;Adck;Argk;bab2;boss;by;CAP;cbt;CG10311;CG10659;CG10663;CG10737;CG10960;CG1136;CG11409;CG12290;CG14989;CG2269;CG30281;CG31140;CG42540;CG42784;CG42808;CG43729;CG44085;CG44153;CG4741;CG5023;CG5177;CG5639;CG6767;CG9331;CG9850;Dscam2;Eip75B;Flo2;fru;Gad1;GLS;Got2;haf;Hr38;IA-2;mbl;Mf;Rim;sNPF;tn;up;Zasp52;Zasp66;zormin
geneListName	transfac_pro__M07683	3.02	0.0621	gt (directAnnotation).	CG7786; Pdp1; hng1; slbo; vri (inferredBy_MotifSimilarity).	268	4290	18SrRNA-Psi:CR41602;Ace;Acer;Act88F;Adck;AdSL;AhcyL2;Aldh;alpha-Est9;Amy-p;Ance;Ank2;Appl;arg;Argk;Arr2;atk;atl;ATP8B;bab2;beat-IIIb;boss;bt;btsz;by;Cad74A;CadN;caix;CAP;CBP;Cbp53E;cbt;Cdk5alpha;CG10283;CG10311;CG10359;CG10512;CG10513;CG10514;CG10663;CG10737;CG1090;CG10932;CG10947;CG10960;CG1136;CG11409;CG11835;CG12099;CG12116;CG12194;CG12290;CG12512;CG14757;CG14820;CG14989;CG15533;CG1640;CG1648;…
geneListName	transfac_pro__M07688	3.02	0.0621	Pdp1 (directAnnotation).	CG7786; gt; hng1; vri (inferredBy_MotifSimilarity).	293	4797	18SrRNA-Psi:CR41602;aay;AcCoAS;Ace;Act88F;Adck;AdSL;AhcyL2;Aldh;alpha-Man-IIa;Amy-p;Ance;Ank2;Appl;AQP;arg;Argk;Arr2;atk;atl;ATP8B;bab2;Bace;beat-IIIb;boss;bt;btsz;by;Cad74A;CadN;caix;CAP;CBP;Cbp53E;cbt;CG10283;CG10311;CG10359;CG10512;CG10513;CG10514;CG10663;CG10737;CG1090;CG10932;CG10947;CG10960;CG1136;CG11409;CG11796;CG11835;CG12099;CG12194;CG12290;CG12512;CG13905;CG13947;CG14757;CG14820;CG1498…
geneListName	transfac_pro__M02004	3.02	0.0620	grn (inferredBy_Orthology).	pnr (inferredBy_MotifSimilarity_n_Orthology).	342	4702	Ac3;AcCoAS;Ace;Acer;Act57B;ade3;ade5;AhcyL2;Aldh;alpha-Est9;Amy-p;Ance;Ank2;Appl;arg;Argk;atk;bab2;Bace;betaTry;boss;btsz;by;Cad74A;CadN;caix;CAP;CBP;cbt;CG10311;CG10361;CG10477;CG10513;CG10514;CG10559;CG10562;CG10799;CG10947;CG10960;CG11200;CG1136;CG1139;CG11409;CG11459;CG11739;CG11912;CG1208;CG12194;CG12290;CG12512;CG13607;CG13905;CG14245;CG14688;CG14963;CG14964;CG14989;CG1544;CG15533;CG1640;CG…
geneListName	cisbp__M0273	3.01	0.0620		Atf-2; Atf3; Atf6; CG44247; CG6272; CrebA; Jra; crc; kay (inferredBy_MotifSimilarity).CrebB; E2f1; Xbp1; tj (inferredBy_MotifSimilarity_n_Orthology).	84	904	Ace;Act88F;Appl;arg;Argk;bab2;boss;by;CadN;CAP;cbt;CG10311;CG10513;CG10514;CG10659;CG10737;CG10960;CG1136;CG11409;CG12290;CG14989;CG1648;CG2082;CG30281;CG3036;CG31140;CG31547;CG34398;CG42540;CG42784;CG42808;CG4335;CG43729;CG43778;CG44085;CG45057;CG5023;CG5065;CG5177;CG5639;CG5800;CG6084;CG6767;CG8547;CG8740;CG9331;CG9850;comm3;cpo;Cyp4e3;DOR;dpr12;Dscam2;Eip75B;Flo2;Frq1;fru;Gad1;Gk2;GLS;Got2;haf…
geneListName	cisbp__M2381	3.00	0.0619		CrebB (inferredBy_MotifSimilarity_n_Orthology).	192	2781	AcCoAS;Ace;Act88F;Adck;Aldh;alpha-Est9;Ance;Ank2;Appl;arg;Argk;atl;bab2;Bace;bmm;boss;btsz;by;Cad74A;CadN;caix;CAP;CBP;cbt;CG10170;CG10283;CG10311;CG10359;CG10513;CG10514;CG10659;CG10737;CG10947;CG10960;CG11147;CG1136;CG11409;CG11658;CG11672;CG12290;CG13947;CG14245;CG14989;CG1544;CG1648;CG16965;CG17124;CG17386;CG1907;CG2082;CG2781;CG30015;CG30281;CG3036;CG31140;CG31272;CG31345;CG31547;CG31663;CG3…

## Sheet: DxS
geneSet	motif	NES	AUC	TF_highConf	TF_lowConf	nEnrGenes	rankAtMax	enrichedGenes
geneListName	cisbp__M1857	6.1	0.129	vri (inferredBy_Orthology).	CG7786; Pdp1; gt (inferredBy_MotifSimilarity_n_Orthology).	8	338	CG10178;CG32816;CG5010;CG8485;fuss;ltl;Nlg1;vri
geneListName	jaspar__MA0025.1	5.9	0.126	vri (inferredBy_Orthology).	CG7786; Pdp1; gt (inferredBy_MotifSimilarity_n_Orthology).	8	338	CG10178;CG32816;CG5010;CG8485;fuss;ltl;Nlg1;vri
geneListName	cisbp__M0783	5.26	0.115	grn (inferredBy_Orthology).	GATAd; GATAe; pnr; srp (inferredBy_MotifSimilarity_n_Orthology).	16	1888	Best2;CG13741;CG16762;CG2371;CG2930;CG31233;CG32816;CG8661;CG8785;fuss;GstE10;ltl;NaPi-T;Slob;Smvt;vri
geneListName	swissregulon__hs__NFIL3.p2	5.04	0.112	vri (inferredBy_Orthology).		7	325	CG10178;CG32816;CG5010;fuss;ltl;Nlg1;vri
geneListName	cisbp__M0785	4.93	0.11	pnr (inferredBy_Orthology).	grn; srp (inferredBy_MotifSimilarity).GATAd; GATAe (inferredBy_MotifSimilarity_n_Orthology).	22	3970	Ag5r;Best2;CG10178;CG13741;CG16762;CG2371;CG2930;CG31233;CG32816;CG8661;CG8785;GstE10;Idgf1;Jon25Biii;ltl;Mdr50;NaPi-T;Obp99b;Slob;Smvt;Su(z)2;vri
geneListName	factorbook__UA3	4.73	0.107		Spps (inferredBy_MotifSimilarity_n_Orthology).	8	563	Best2;CG16700;CG16885;CG30438;CG32816;Mal-A8;Nlg1;Su(z)2
geneListName	cisbp__M3334	4.61	0.105	pnr (inferredBy_Orthology).	GATAd; GATAe; grn; srp (inferredBy_MotifSimilarity_n_Orthology).	12	1180	CG13741;CG16762;CG2371;CG2930;CG31233;CG32816;CG8661;CG8785;ltl;Mdr50;Slob;Smvt
geneListName	transfac_pro__M06973	4.58	0.104	Mad (inferredBy_Orthology).		6	352	Best2;CG14883;CG32816;Mal-A8;Su(z)2;vri
geneListName	cisbp__M0798	4.51	0.103	GATAd; GATAe; grn; pnr; srp (inferredBy_Orthology).		9	613	CG13741;CG16762;CG2930;CG31233;CG32816;CG8785;ltl;Slob;Smvt
geneListName	transfac_public__M00462	4.48	0.103	pnr (inferredBy_Orthology).	GATAd; GATAe; grn; srp (inferredBy_MotifSimilarity_n_Orthology).	12	1225	CG13741;CG16762;CG2371;CG2930;CG31233;CG32816;CG8661;CG8785;ltl;Mdr50;Slob;Smvt
geneListName	c2h2_zfs__M3835	4.44	0.102		Spps (inferredBy_MotifSimilarity_n_Orthology).	8	763	Best2;CG16700;CG16885;CG30438;CG32816;Mal-A8;Nlg1;Su(z)2
geneListName	cisbp__M6368	4.33	0.1	vri (inferredBy_Orthology).	gt (inferredBy_MotifSimilarity).CG7786; Pdp1 (inferredBy_MotifSimilarity_n_Orthology).	10	956	CG10178;CG16885;CG32816;CG5010;CG8485;fuss;ltl;Nlg1;Su(z)2;vri
geneListName	hocomoco__NFIL3_HUMAN.H10MO.C	4.31	0.0998	vri (inferredBy_Orthology).	gt (inferredBy_MotifSimilarity).CG7786; Pdp1 (inferredBy_MotifSimilarity_n_Orthology).	10	998	CG10178;CG16885;CG32816;CG5010;CG8485;fuss;ltl;Nlg1;Su(z)2;vri
geneListName	cisbp__M0802	4.3	0.0997	GATAd; GATAe; grn; pnr; srp (inferredBy_Orthology).		10	953	CG13741;CG16762;CG2930;CG31233;CG32816;CG8661;CG8785;ltl;Slob;Smvt
geneListName	taipale__TEF_FL_NRTTACRTAAYN	4.29	0.0994	CG7786; Pdp1; gt (inferredBy_Orthology).	hng1; vri (inferredBy_MotifSimilarity).	6	293	CG10178;CG16885;CG5010;fuss;ltl;vri
geneListName	cisbp__M5910	4.23	0.0984	CG7786; Pdp1; gt (inferredBy_Orthology).	hng1; vri (inferredBy_MotifSimilarity).	6	299	CG10178;CG16885;CG5010;fuss;ltl;vri
geneListName	transfac_pro__M06929	4.14	0.097	Mad (inferredBy_Orthology).		11	1471	Best2;CG14883;CG16885;CG32816;CG8785;fuss;Mal-A8;Nlg1;Slob;Su(z)2;vri
geneListName	cisbp__M4088	4.1	0.0963	CG7786; Pdp1; gt (inferredBy_Orthology).	vri (inferredBy_MotifSimilarity).	14	1950	Best2;CG10178;CG16885;CG32816;CG5010;CG8485;fuss;ltl;Mdr50;Nlg1;Slob;Smvt;Su(z)2;vri
geneListName	cisbp__M3156	4.09	0.0962	vri (inferredBy_Orthology).	gt (inferredBy_MotifSimilarity).CG7786; Pdp1 (inferredBy_MotifSimilarity_n_Orthology).	7	610	CG10178;CG32816;CG5010;fuss;ltl;Su(z)2;vri
geneListName	transfac_pro__M06947	4.08	0.096	Mad (inferredBy_Orthology).		6	401	Best2;CG14883;CG32816;Mal-A8;Su(z)2;vri
geneListName	transfac_pro__M06257	4.06	0.0956			7	516	CG14883;CG2371;CG32816;fuss;iotaTry;Slob;Su(z)2
geneListName	transfac_pro__M00647	4.05	0.0955	EcR; usp (inferredBy_Orthology).	svp (inferredBy_MotifSimilarity_n_Orthology).	8	763	Best2;CG13741;CG32816;CG8785;ltl;Obp99b;Orct2;Su(z)2
geneListName	transfac_public__M00228	4.01	0.0948	CG7786; Pdp1; gt (inferredBy_Orthology).	vri (inferredBy_MotifSimilarity).	9	814	CG10178;CG16885;CG32816;CG5010;CG8485;fuss;ltl;Nlg1;vri
geneListName	cisbp__M2251	3.97	0.0942	gt (directAnnotation).	CG7786; Pdp1; hng1; vri (inferredBy_MotifSimilarity).	5	269	CG16885;CG5010;fuss;ltl;vri
geneListName	transfac_pro__M06501	3.96	0.0939			5	264	CG16762;CG32816;Jon25Biii;Nlg1;swi2
geneListName	transfac_pro__M05449	3.94	0.0937			8	710	Best2;CG30438;CG32816;ltl;NaPi-T;Nlg1;RpL24-like;vri
geneListName	cisbp__M5100	3.93	0.0935	Max (directAnnotation).	Myc (inferredBy_MotifSimilarity_n_Orthology).	20	3775	Best2;CG10178;CG12288;CG13741;CG31233;CG32816;CG5010;CG8661;CG8785;fuss;Idgf1;iotaTry;Mdr50;Nlg1;Non1;Orct2;RpL24-like;Slob;Su(z)2;vri
geneListName	jaspar__MA0447.1	3.92	0.0934	gt (directAnnotation).	CG7786; Pdp1; hng1; vri (inferredBy_MotifSimilarity).	6	401	CG16885;CG5010;CG8485;fuss;ltl;vri
geneListName	flyfactorsurvey__Hnf4_SANGER_10_FBgn0004914	3.84	0.092	Hnf4 (directAnnotation).		7	480	Best2;CG16885;CG32816;ltl;Mal-A8;Orct2;vri
geneListName	cisbp__M0327	3.78	0.0909		Atf6 (inferredBy_MotifSimilarity).CrebA (inferredBy_MotifSimilarity_n_Orthology).	18	3278	Best2;CG10178;CG12288;CG13741;CG16826;CG31233;CG32816;CG5010;CG8661;CG8785;fuss;ltl;Nlg1;Orct2;RpL24-like;Slob;Su(z)2;vri
geneListName	cisbp__M6024	3.78	0.0909	CG7786; Pdp1; gt (inferredBy_Orthology).	hng1; slbo; vri (inferredBy_MotifSimilarity).	6	426	CG5010;CG8485;fuss;ltl;Smvt;vri
geneListName	transfac_pro__M04785	3.76	0.0907	vtd (inferredBy_Orthology).		5	264	CG32816;Idgf1;iotaTry;Nlg1;vri
geneListName	transfac_pro__M07688	3.76	0.0906	Pdp1 (directAnnotation).	CG7786; gt; hng1; vri (inferredBy_MotifSimilarity).	8	763	CG10178;CG16885;CG32816;CG5010;CG8485;fuss;ltl;vri
geneListName	cisbp__M5255	3.74	0.0904		da; twi (inferredBy_MotifSimilarity).	6	338	Best2;CG10178;CG32816;ltl;Nlg1;Obp99b
geneListName	transfac_pro__M07730	3.74	0.0904	grn (directAnnotation).	GATAe (inferredBy_MotifSimilarity).	7	526	Best2;CG16762;CG32816;CG8785;fuss;Idgf1;ltl
geneListName	stark__TTAYGTAA	3.74	0.0903	gt (directAnnotation).	CG7786; Pdp1; vri (inferredBy_MotifSimilarity_n_Orthology).	8	610	CG10178;CG32816;CG5010;CG8485;fuss;ltl;Nlg1;vri
geneListName	taipale__Hlf_DBD_NRTTACGTAAYN	3.74	0.0903	CG7786; Pdp1; gt (inferredBy_Orthology).	hng1; slbo; vri (inferredBy_MotifSimilarity).	6	480	CG5010;CG8485;fuss;ltl;Smvt;vri
geneListName	cisbp__M5663	3.73	0.0901	vri (inferredBy_Orthology).	CG7786; Pdp1; gt; hng1; slbo (inferredBy_MotifSimilarity).	6	426	CG16885;CG32816;CG5010;fuss;ltl;vri
geneListName	taipale__HLF_full_NRTTACGTAAYN	3.73	0.0901	CG7786; Pdp1; gt (inferredBy_Orthology).	hng1; vri (inferredBy_MotifSimilarity).	5	251	CG16885;CG5010;fuss;ltl;vri
geneListName	predrem__nrMotif97	3.71	0.0899			12	1707	Best2;CG10178;CG14883;CG16762;CG32816;CG8485;fuss;Idgf1;Mal-A8;Nlg1;Su(z)2;vri
geneListName	cisbp__M0095	3.7	0.0898			4	124	CG16885;ltl;Nlg1;Su(z)2
geneListName	taipale__NFIL3_DBD_NRTTACRTAAYN_repr	3.69	0.0894	vri (inferredBy_Orthology).	CG7786; Pdp1; gt; hng1; slbo (inferredBy_MotifSimilarity).	5	251	CG16885;CG5010;fuss;ltl;vri
geneListName	transfac_public__M00045	3.69	0.0894	vri (inferredBy_Orthology).	gt (inferredBy_MotifSimilarity).CG7786; Pdp1 (inferredBy_MotifSimilarity_n_Orthology).	11	1625	Best2;CG10178;CG16885;CG32816;CG5010;CG8485;fuss;ltl;Nlg1;Su(z)2;vri
geneListName	cisbp__M5516	3.68	0.0894	CG7786; Pdp1; gt (inferredBy_Orthology).	hng1; vri (inferredBy_MotifSimilarity).	5	264	CG16885;CG5010;fuss;ltl;vri
geneListName	cisbp__M5338	3.67	0.0892	CG7786; Pdp1; gt (inferredBy_Orthology).	hng1; slbo; vri (inferredBy_MotifSimilarity).	5	277	CG16885;CG5010;fuss;ltl;vri
geneListName	taipale__DBP_full_NRTTACGTAAYN	3.67	0.0892	CG7786; Pdp1; gt (inferredBy_Orthology).	hng1; slbo; vri (inferredBy_MotifSimilarity).	5	293	CG16885;CG5010;fuss;ltl;vri
geneListName	transfac_pro__M03828	3.65	0.0888	Hnf4 (inferredBy_Orthology).	usp (inferredBy_MotifSimilarity).ERR; EcR; Hr38; Hr51; Hr78; fkh; svp (inferredBy_MotifSimilarity_n_Orthology).	7	511	CG16885;CG32816;CG5010;Nlg1;Slob;Su(z)2;vri
geneListName	transfac_pro__M01878	3.64	0.0888	grn (inferredBy_Orthology).		21	3120	Ag5r;Best2;CG10178;CG16700;CG16762;CG16826;CG16885;CG2930;CG31233;CG32816;CG8661;CG8785;GstE10;Idgf1;ltl;Mdr50;NaPi-T;Nlg1;Slob;Smvt;vri
geneListName	taipale__SOX9_full_NATGAATKNYAGTCATN	3.64	0.0887	Sox100B (inferredBy_Orthology).	Sox15 (inferredBy_MotifSimilarity_n_Orthology).	7	480	CG16885;CG17556;CG30438;CG32816;CG6048;Idgf1;Slob
geneListName	flyfactorsurvey__twi_da_SANGER_5_FBgn0000413	3.63	0.0885	da (directAnnotation).	twi (inferredBy_MotifSimilarity).	6	434	Best2;CG10178;CG32816;ltl;Nlg1;Obp99b
geneListName	tfdimers__MD00133	3.58	0.0878	pho (inferredBy_Orthology).		6	480	CG32816;CG43055;Idgf1;Nlg1;Slob;vri
geneListName	transfac_pro__M06987	3.56	0.0874			5	281	Best2;CG14883;CG32816;Mal-A8;vri
geneListName	tfdimers__MD00082	3.55	0.0873	grn; pnr (inferredBy_Orthology).		6	387	Best2;CG16885;CG32816;ltl;Nlg1;Slob
geneListName	predrem__nrMotif56	3.54	0.087			5	320	Best2;CG32816;CG5010;Non1;RpL24-like
geneListName	flyfactorsurvey__ttk-PA_SANGER_5_FBgn0003870	3.5	0.0865	ttk (directAnnotation).		6	402	CG10178;CG32816;fuss;Idgf1;Su(z)2;vri
geneListName	transfac_pro__M06050	3.49	0.0861			12	1625	CG16826;CG16885;CG2930;CG32816;CG8661;CG8665;Idgf1;Mal-A8;Nlg1;Obp99b;Su(z)2;vri
geneListName	predrem__nrMotif2605	3.45	0.0856			7	563	CG10178;CG16885;CG32816;CG8785;fuss;Nlg1;Slob
geneListName	predrem__nrMotif221	3.45	0.0855			7	604	Best2;CG16885;CG2930;CG32816;ltl;Slob;vri
geneListName	swissregulon__sacCer__GLN3	3.44	0.0854	GATAd; GATAe; grn; pnr; srp (inferredBy_Orthology).		26	4930	CG10178;CG13741;CG16762;CG16826;CG2371;CG2930;CG31233;CG32816;CG8485;CG8661;CG8785;GstE10;Idgf1;Jon25Biii;Jon65Ai;Jon99Fii;ltl;Mal-A8;Mdr50;NaPi-T;Nlg1;Obp99b;Slob;Smvt;Su(z)2;vri
geneListName	transfac_pro__M06235	3.42	0.0851			6	493	Best2;CG32816;fuss;ltl;Nlg1;Su(z)2
geneListName	flyfactorsurvey__Max_Mnt_SANGER_5_FBgn0017578	3.42	0.0851	Max (directAnnotation).	Myc (inferredBy_MotifSimilarity_n_Orthology).	21	3995	Best2;CG10178;CG12288;CG13741;CG16826;CG31233;CG32816;CG5010;CG8661;CG8785;fuss;Idgf1;iotaTry;Mdr50;Nlg1;Non1;Orct2;RpL24-like;Slob;Su(z)2;vri
geneListName	transfac_pro__M03130	3.42	0.0851		Oli (inferredBy_MotifSimilarity_n_Orthology).	5	225	Best2;CG10178;CG32816;ltl;Nlg1
geneListName	cisbp__M5909	3.41	0.0849	CG7786; Pdp1; gt (inferredBy_Orthology).	hng1; slbo; vri (inferredBy_MotifSimilarity).	4	117	CG5010;fuss;ltl;vri
geneListName	neph__UW.Motif.0533	3.41	0.0849			5	283	CG32816;CG8785;Idgf1;Nlg1;Slob
geneListName	transfac_pro__M06232	3.4	0.0848	CG5245 (inferredBy_Orthology).		5	293	Best2;CG16885;CG32816;Nlg1;vri
geneListName	taipale__TEF_DBD_NRTTACRTAAYN	3.4	0.0847	CG7786; Pdp1; gt (inferredBy_Orthology).	hng1; slbo; vri (inferredBy_MotifSimilarity).	4	118	CG5010;fuss;ltl;vri
geneListName	swissregulon__hs__HLF.p2	3.38	0.0844	CG7786; Pdp1; gt (inferredBy_Orthology).	vri (inferredBy_MotifSimilarity).	5	387	CG16885;CG5010;fuss;ltl;vri
geneListName	cisbp__M5478	3.37	0.0843	pnr (inferredBy_Orthology).	grn; srp (inferredBy_MotifSimilarity).CycT; GATAd; GATAe; HLH3B; Sirt6 (inferredBy_MotifSimilarity_n_Orthology).	25	3775	Ag5r;Best2;CG10178;CG13741;CG16762;CG16826;CG2371;CG2930;CG31233;CG32816;CG43055;CG8661;CG8785;GstE10;Idgf1;Jon25Biii;Jon65Ai;ltl;Mal-A8;Mdr50;NaPi-T;Obp99b;Slob;Smvt;vri
geneListName	transfac_pro__M07674	3.36	0.0841	CG7786 (directAnnotation).	Pdp1; gt; hng1; slbo; vri (inferredBy_MotifSimilarity).	5	199	CG16885;CG5010;fuss;ltl;vri
geneListName	predrem__nrMotif1031	3.36	0.0841			9	843	Best2;CG16700;CG16885;CG32816;Idgf1;ltl;Mdr50;Su(z)2;vri
geneListName	neph__UW.Motif.0512	3.36	0.084			5	293	CG10178;CG16885;CG32816;Idgf1;Nlg1
geneListName	cisbp__M5250	3.35	0.084	ttk (directAnnotation).		5	387	CG32816;fuss;Idgf1;Su(z)2;vri
geneListName	transfac_pro__M07439	3.34	0.0837	CG7786; Pdp1; gt (inferredBy_Orthology).	hng1; vri (inferredBy_MotifSimilarity).	5	309	CG16885;CG5010;fuss;ltl;vri
geneListName	predrem__nrMotif207	3.34	0.0837			5	387	Best2;CG16826;ltl;Su(z)2;vri
geneListName	cisbp__M4543	3.33	0.0835		Myc (inferredBy_MotifSimilarity_n_Orthology).	7	604	CG13741;CG32816;Nlg1;Orct2;RpL24-like;Slob;vri
geneListName	taipale__PAX9_DBD_SGTCACGCWTGANTGMA	3.29	0.0829	Poxm (inferredBy_Orthology).	sv; toy (inferredBy_MotifSimilarity).ey (inferredBy_MotifSimilarity_n_Orthology).	23	4420	Best2;CG10178;CG13741;CG16700;CG16762;CG2371;CG2930;CG30438;CG31812;CG32816;CG40191;CG43055;CG8485;fuss;Jon25Biii;Jon99Fii;ltl;Nlg1;Obp99b;Slob;Smvt;Su(z)2;vri
geneListName	cisbp__M4249	3.29	0.0829		CG7786; vri (inferredBy_MotifSimilarity).Pdp1; gt (inferredBy_MotifSimilarity_n_Orthology).	7	703	CG32816;CG5010;CG8485;fuss;ltl;Nlg1;vri
geneListName	predrem__nrMotif725	3.29	0.0829			4	158	Best2;CG10178;CG32816;ltl
geneListName	cisbp__M5030	3.28	0.0828	Hnf4 (directAnnotation).		6	480	Best2;CG16885;CG32816;ltl;Orct2;vri
geneListName	cisbp__M5476	3.26	0.0825	grn (inferredBy_Orthology).	pnr; srp (inferredBy_MotifSimilarity).CycT; GATAd; GATAe; HLH3B (inferredBy_MotifSimilarity_n_Orthology).	28	4629	Ag5r;Best2;CG10178;CG13741;CG16762;CG16826;CG2371;CG2930;CG31233;CG32816;CG43055;CG8661;CG8785;GstE10;Idgf1;iotaTry;Jon25Biii;Jon65Ai;ltl;Mal-A8;Mdr50;NaPi-T;Nlg1;Obp99b;Slob;Smvt;Su(z)2;vri
geneListName	idmmpmm__dl	3.26	0.0825	dl (directAnnotation).	Dif (inferredBy_MotifSimilarity).Rel (inferredBy_MotifSimilarity_n_Orthology).	7	703	Best2;CG10178;CG32816;CG6048;ltl;Nlg1;Su(z)2
geneListName	jaspar__MA0164.1	3.25	0.0823	Hr51 (inferredBy_Orthology).		7	703	Best2;CG14883;CG32816;GstE10;Idgf1;Slob;vri
geneListName	jaspar__MA0552.1	3.25	0.0822			7	631	CG13741;CG31233;CG32816;Nlg1;RpL24-like;Slob;vri
geneListName	taipale__GATA3_DBD_AGATAANN_repr	3.24	0.0821	grn (inferredBy_Orthology).	pnr; srp (inferredBy_MotifSimilarity).GATAd; GATAe; HLH3B (inferredBy_MotifSimilarity_n_Orthology).	28	4629	Ag5r;Best2;CG10178;CG13741;CG16762;CG16826;CG2371;CG2930;CG31233;CG32816;CG43055;CG8661;CG8785;GstE10;Idgf1;iotaTry;Jon25Biii;Jon65Ai;ltl;Mal-A8;Mdr50;NaPi-T;Nlg1;Obp99b;Slob;Smvt;Su(z)2;vri
geneListName	cisbp__M1336	3.21	0.0817			27	4825	Ag5r;CG10178;CG13741;CG14883;CG16762;CG2930;CG31233;CG32816;CG43055;CG8661;CG8785;GstE10;Idgf1;iotaTry;Jon25Biii;Jon65Ai;Jon99Fii;ltl;Mal-A8;Mdr50;NaPi-T;Nlg1;Obp99b;Slob;Smvt;Su(z)2;vri
geneListName	cisbp__M4353	3.21	0.0816		CG7786; Pdp1; gt (inferredBy_MotifSimilarity_n_Orthology).	6	540	CG32816;CG5010;CG8485;fuss;Nlg1;vri
geneListName	cisbp__M2345	3.21	0.0816			7	642	CG13741;CG31233;CG32816;Nlg1;RpL24-like;Slob;vri
geneListName	transfac_pro__M01724	3.21	0.0815			5	251	CG16826;CG16885;CG32816;Obp99b;vri
geneListName	transfac_pro__M07660	3.2	0.0814	twi (directAnnotation).		5	357	CG10178;CG32816;ltl;Nlg1;Orct2
geneListName	predrem__nrMotif1301	3.19	0.0813			8	826	Best2;CG13741;CG16826;CG16885;CG32816;CG43055;Obp99b;Slob
geneListName	jaspar__MA0607.1	3.16	0.0807	dimm (inferredBy_Orthology).		10	1291	CG10178;CG16826;CG2371;CG32816;fuss;ltl;Nlg1;Obp99b;Slob;vri
geneListName	jaspar__MA0360.1	3.15	0.0807			5	387	Best2;CG32816;ltl;Nlg1;Slob
geneListName	taipale__SOX9_full_NATCAATKNYAGTGATN	3.15	0.0806	Sox100B (inferredBy_Orthology).	D; Sox14; Sox15; Sox21a; Sox21b; SoxN (inferredBy_MotifSimilarity_n_Orthology).	8	656	CG2371;CG30438;CG32816;CG8665;fuss;Idgf1;Nlg1;Slob
geneListName	cisbp__M0782	3.15	0.0805	pnr (inferredBy_Orthology).	GATAe (inferredBy_MotifSimilarity).CycT; GATAd; HLH3B; grn; srp (inferredBy_MotifSimilarity_n_Orthology).	21	3775	Ag5r;Best2;CG10178;CG13741;CG16762;CG2371;CG2930;CG31233;CG32816;CG8661;CG8785;GstE10;Idgf1;Jon25Biii;ltl;Mdr50;NaPi-T;Obp99b;Slob;Smvt;vri
geneListName	jaspar__MA0608.1	3.13	0.0803	CrebA (inferredBy_Orthology).		19	2926	Best2;CG10178;CG12288;CG13741;CG14883;CG16826;CG31233;CG32816;CG5010;CG6048;CG8661;CG8785;fuss;Idgf1;Nlg1;Orct2;Slob;Su(z)2;vri
geneListName	transfac_pro__M01912	3.13	0.0803			5	391	Best2;CG32816;ltl;Nlg1;Slob
geneListName	cisbp__M5999	3.12	0.0802	CG7786; Pdp1; gt (inferredBy_Orthology).	hng1; slbo; vri (inferredBy_MotifSimilarity).	4	158	CG5010;fuss;ltl;vri
geneListName	predrem__nrMotif1835	3.12	0.0801			7	656	Best2;CG16762;CG16826;CG32816;fuss;Idgf1;Nlg1
geneListName	swissregulon__hs__ATF2.p2	3.12	0.0801		gt (inferredBy_MotifSimilarity).CG7786; Pdp1; vri (inferredBy_MotifSimilarity_n_Orthology).	9	1157	Best2;CG10178;CG32816;CG5010;CG8485;fuss;ltl;Nlg1;vri
geneListName	taipale_tf_pairs__CUX1_HOXB13_SYMRTAAANATYGATN_CAP	3.12	0.08	Abd-B (inferredBy_Orthology).		5	319	CG2371;CG32816;Idgf1;Nlg1;Slob
geneListName	cisbp__M1766	3.1	0.0799			4	182	Best2;ltl;Nlg1;Su(z)2
geneListName	taipale__GATA4_DBD_AGATAANN	3.1	0.0798	pnr (inferredBy_Orthology).	grn; srp (inferredBy_MotifSimilarity).CycT; GATAd; GATAe; HLH3B; Sirt6 (inferredBy_MotifSimilarity_n_Orthology).	25	3603	Ag5r;Best2;CG10178;CG13741;CG16762;CG16826;CG2371;CG2930;CG31233;CG32816;CG43055;CG8661;CG8785;GstE10;Idgf1;Jon25Biii;Jon65Ai;ltl;Mal-A8;Mdr50;NaPi-T;Obp99b;Slob;Smvt;vri
geneListName	tiffin__TIFDMEM0000003	3.1	0.0798			5	277	CG10178;CG16826;CG32816;Nlg1;Slob
geneListName	transfac_pro__M06711	3.09	0.0797			7	604	Best2;CG32816;fuss;GstE10;Idgf1;Nlg1;Orct2
geneListName	transfac_pro__M01023	3.09	0.0797	Hsf (inferredBy_Orthology).		8	847	CG16885;CG2930;CG32816;CG5010;Nlg1;Obp99b;Slob;vri
geneListName	cisbp__M0452	3.08	0.0795			6	617	CG14883;CG32816;GstE10;Idgf1;Nlg1;Slob
geneListName	cisbp__M0218	3.08	0.0794	dimm (inferredBy_Orthology).		8	703	CG10178;CG16826;CG32816;fuss;ltl;Nlg1;Obp99b;vri
geneListName	transfac_pro__M01131	3.07	0.0793	Sox100B (inferredBy_Orthology).		7	703	CG16826;CG32816;CG43055;Idgf1;Nlg1;Slob;Su(z)2
geneListName	transfac_pro__M02757	3.06	0.0792	pnr (inferredBy_Orthology).	grn (inferredBy_MotifSimilarity_n_Orthology).	15	2187	CG13741;CG16762;CG2930;CG31233;CG32816;CG8661;CG8785;GstE10;Jon25Biii;ltl;Mdr50;Obp99b;Slob;Smvt;vri
geneListName	transfac_pro__M03562	3.06	0.0791			5	251	CG16885;CG32816;Idgf1;Slob;vri
geneListName	transfac_pro__M03795	3.05	0.079	EcR (inferredBy_Orthology).	svp; usp (inferredBy_MotifSimilarity_n_Orthology).	6	455	Best2;CG32816;ltl;Nlg1;Obp99b;Orct2
geneListName	flyfactorsurvey__Hsf_FlyReg_FBgn0001222	3.05	0.079	Hsf (directAnnotation).		9	709	CG10178;CG16885;CG30438;CG32816;Idgf1;Nlg1;Slob;Su(z)2;vri
geneListName	transfac_pro__M05279	3.05	0.0789			4	195	CG16826;Nlg1;Slob;vri
geneListName	cisbp__M0449	3.03	0.0787			5	387	CG14883;CG32816;GstE10;Idgf1;Nlg1
geneListName	predrem__nrMotif1902	3.03	0.0786			5	310	CG16885;CG32816;Nlg1;Slob;vri
geneListName	elemento__ATCCCAGCA	3.02	0.0785			7	563	CG16700;CG16826;CG32816;ltl;Nlg1;Slob;Su(z)2
geneListName	neph__UW.Motif.0402	3.01	0.0783			5	352	CG32816;CG43055;Idgf1;Nlg1;Slob
geneListName	transfac_pro__M07735	3.01	0.0782	gcm (directAnnotation).	gcm2 (inferredBy_MotifSimilarity).	5	418	CG16826;CG32816;CG8785;fuss;Su(z)2
geneListName	transfac_pro__M01877	3.01	0.0782	grn (inferredBy_Orthology).		20	3120	Ag5r;CG13741;CG16700;CG16762;CG2371;CG2930;CG31233;CG32816;CG43055;CG8661;CG8785;Idgf1;ltl;Mdr50;NaPi-T;Nlg1;Obp99b;Slob;Smvt;vri
geneListName	homer__AGATAASR_GATA3	3.01	0.0782	grn (inferredBy_Orthology).	srp (inferredBy_MotifSimilarity).pnr (inferredBy_MotifSimilarity_n_Orthology).	27	4318	Ag5r;Best2;CG10178;CG13741;CG16762;CG16826;CG2371;CG2930;CG31233;CG32816;CG43055;CG8661;CG8785;GstE10;Idgf1;iotaTry;Jon25Biii;ltl;Mal-A8;Mdr50;NaPi-T;Nlg1;Obp99b;Slob;Smvt;Su(z)2;vri
geneListName	cisbp__M0305	3	0.0782	CrebA (inferredBy_Orthology).		18	2926	Best2;CG10178;CG12288;CG13741;CG16826;CG31233;CG32816;CG5010;CG6048;CG8661;CG8785;fuss;Idgf1;Nlg1;Orct2;Slob;Su(z)2;vri

## Sheet: D+DxS
geneSet	motif	NES	AUC	TF_highConf	TF_lowConf	nEnrGenes	rankAtMax	enrichedGenes
geneListName	cisbp__M0798	7.77	0.0853	GATAd; GATAe; grn; pnr; srp (inferredBy_Orthology).		31	1730	CG10472;CG10621;CG10827;CG11911;CG15255;CG15534;CG17633;CG3106;CG31343;CG33511;CG34040;CG34330;CG3699;CG42249;CG4467;CG4562;CG6283;CG8468;daw;Jon65Aiii;Jon65Aiv;lambdaTry;Mal-A1;Mal-A2;Mal-A4;NAAT1;Octbeta2R;plh;sug;tobi;Zip89B
geneListName	cisbp__M3334	7.07	0.0789	pnr (inferredBy_Orthology).	GATAd; GATAe; grn; srp (inferredBy_MotifSimilarity_n_Orthology).	47	3162	Ahcy;AkhR;cDIP;CG10433;CG10472;CG10516;CG10621;CG10827;CG11911;CG15255;CG15534;CG16758;CG17633;CG3106;CG31343;CG3344;CG34040;CG34330;CG3609;CG3699;CG3868;CG42249;CG4562;CG6283;CG8249;CG8468;CG9449;CG9451;CG9896;daw;Eip71CD;Hsc70-1;Jon65Aiii;Jon65Aiv;Jon99Ciii;lambdaTry;Mal-A1;Mal-A2;Mal-A4;NAAT1;Npc2d;Octbeta2R;plh;smp-30;sug;tobi;Zip89B
geneListName	cisbp__M0785	7.02	0.0785	pnr (inferredBy_Orthology).	grn; srp (inferredBy_MotifSimilarity).GATAd; GATAe (inferredBy_MotifSimilarity_n_Orthology).	70	4907	Ahcy;AkhR;Atg4a;cDIP;CG10184;CG10433;CG10472;CG10516;CG10621;CG10827;CG11594;CG11911;CG12766;CG14292;CG15255;CG15534;CG15553;CG16727;CG16758;CG17192;CG17633;CG3106;CG31343;CG3332;CG3344;CG33511;CG34040;CG34330;CG3609;CG3699;CG3739;CG3868;CG42235;CG42249;CG4467;CG4562;CG6283;CG8249;CG8468;CG9682;CG9896;Cyp309a1;Cyp309a2;Cyp4s3;daw;Eip71CD;GstD8;Hex-C;Jon65Aii;Jon65Aiii;Jon65Aiv;Jon99Cii;Jon99Ciii;…
geneListName	cisbp__M0787	6.98	0.0781		GATAe; grn; srp (inferredBy_MotifSimilarity).CycT; GATAd; HLH3B; pnr (inferredBy_MotifSimilarity_n_Orthology).	33	2072	CG10472;CG10827;CG15534;CG16758;CG17633;CG3106;CG31343;CG34040;CG34330;CG3609;CG3699;CG3868;CG42249;CG4562;CG6283;CG8249;CG8468;CG9449;CG9451;daw;Jon65Aiii;Jon65Aiv;lambdaTry;Mal-A1;Mal-A2;Mal-A4;NAAT1;Octbeta2R;plh;smp-30;sug;tobi;Zip89B
geneListName	transfac_public__M00462	6.87	0.0771	pnr (inferredBy_Orthology).	GATAd; GATAe; grn; srp (inferredBy_MotifSimilarity_n_Orthology).	49	3511	Ahcy;AkhR;cDIP;CG10433;CG10472;CG10516;CG10621;CG10827;CG11911;CG15255;CG15534;CG15553;CG16758;CG17633;CG3106;CG31343;CG3344;CG34040;CG34330;CG3609;CG3699;CG3868;CG42249;CG4562;CG6283;CG8249;CG8468;CG9449;CG9451;CG9896;daw;Eip71CD;Hex-C;Hsc70-1;Jon65Aiii;Jon65Aiv;Jon99Ciii;lambdaTry;Mal-A1;Mal-A2;Mal-A4;NAAT1;Npc2d;Octbeta2R;plh;smp-30;sug;tobi;Zip89B
geneListName	swissregulon__hs__TBP.p2	6.58	0.0744	Tbp (inferredBy_Orthology).	RpII215; Taf1 (inferredBy_MotifSimilarity_n_Orthology).	39	2553	cDIP;CG10184;CG10472;CG10621;CG11911;CG13618;CG14292;CG16727;CG17633;CG3106;CG3332;CG34040;CG34330;CG4467;CG4562;CG6283;CG8468;Cyp6a20;Eip71CD;GstD8;GstE3;Jon65Aiii;Jon65Aiv;Jon99Cii;Jon99Ciii;Mal-A1;Mal-A2;Mal-A4;Mal-A7;NAAT1;Nmdmc;Npc2d;Obp44a;Obp99a;Octbeta2R;plh;sug;Tsf1;yip7
geneListName	homer__CTATAAAAGCSV_TATA-box	6.48	0.0735		Tbp (inferredBy_MotifSimilarity).RpII215; Taf1 (inferredBy_MotifSimilarity_n_Orthology).	60	4960	cDIP;CG10184;CG10472;CG10516;CG10621;CG10827;CG11911;CG12224;CG13428;CG13618;CG14292;CG16727;CG17032;CG17192;CG17633;CG18268;CG3106;CG34040;CG34330;CG3739;CG42235;CG42821;CG4467;CG4562;CG6283;CG8468;CG9449;CG9451;CG9682;Cpn;Cyp6a20;dati;GNBP-like3;GstD2;GstD5;GstD8;GstE3;Hsc70-1;inaC;Jon65Aii;Jon65Aiii;Jon65Aiv;Jon99Cii;Jon99Ciii;LManIII;Mal-A1;Mal-A2;Mal-A4;Mal-A7;Nmdmc;Npc2d;Obp44a;Octbeta2R;Pe…
geneListName	cisbp__M0802	6.46	0.0733	GATAd; GATAe; grn; pnr; srp (inferredBy_Orthology).		58	4989	Ahcy;AkhR;cDIP;CG10433;CG10472;CG10516;CG10621;CG10827;CG11911;CG12766;CG13618;CG14292;CG15255;CG15534;CG16727;CG16758;CG17633;CG3106;CG31343;CG3332;CG3344;CG33511;CG34040;CG34330;CG3609;CG3699;CG3868;CG42249;CG4467;CG4562;CG6283;CG8249;CG8468;CG9896;daw;Eip71CD;Hex-C;Jon65Aiii;Jon65Aiv;Jon99Cii;Jon99Ciii;lambdaTry;Mal-A1;Mal-A2;Mal-A4;NAAT1;ninaC;Nmdmc;Npc2d;Octbeta2R;plh;Rh4;smp-30;Sodh-1;sug;t…
geneListName	factorbook__TBP	5.86	0.0678	RpII215; Taf1; Tbp (inferredBy_Orthology).		50	4270	cDIP;CG10184;CG10472;CG10621;CG10827;CG11911;CG12224;CG13618;CG14292;CG16727;CG16758;CG17633;CG3106;CG3344;CG34040;CG34330;CG3739;CG42821;CG4467;CG4562;CG8468;CG9449;CG9451;Cpn;Cyp4s3;Cyp6a20;dati;GstD5;GstD8;GstE3;Jon65Aii;Jon65Aiii;Jon65Aiv;Jon99Cii;lcs;LManIII;Mal-A1;Mal-A2;Mal-A4;Mal-A7;NAAT1;Nmdmc;Npc2d;Obp44a;Obp99a;Octbeta2R;plh;tobi;Tsf1;yip7
geneListName	cisbp__M0796	5.78	0.0670	GATAd; GATAe; grn; pnr; srp (inferredBy_Orthology).		66	4999	Ahcy;AkhR;Atg4a;cDIP;CG10472;CG10516;CG10621;CG10827;CG11911;CG14292;CG15255;CG15534;CG15553;CG16727;CG16758;CG17192;CG17633;CG3106;CG31343;CG3332;CG3344;CG33511;CG34040;CG34330;CG3609;CG3699;CG3739;CG3868;CG42249;CG4467;CG4562;CG6283;CG7881;CG8468;CG9510;CG9682;CG9896;Cyp309a1;Cyp309a2;daw;Eip71CD;GstD5;GstD8;Hex-C;Jon65Aiii;Jon65Aiv;Jon99Cii;lambdaTry;LManIII;Mal-A1;Mal-A2;Mal-A4;Mal-A7;NAAT1;N…
geneListName	yetfasco__YJL110C_2133	5.61	0.0654	GATAd; GATAe; grn; pnr; srp (inferredBy_Orthology).		44	3670	Ahcy;AkhR;cDIP;CG10433;CG10472;CG10621;CG10827;CG15255;CG15534;CG16758;CG17633;CG3106;CG31343;CG34040;CG34330;CG3609;CG3699;CG3868;CG42249;CG4467;CG4562;CG6283;CG8249;CG8468;CG9449;CG9451;CG9896;dati;daw;Eip71CD;Jon65Aiii;Jon65Aiv;lambdaTry;Mal-A1;Mal-A2;Mal-A4;NAAT1;Npc2d;Octbeta2R;plh;smp-30;sug;tobi;Zip89B
geneListName	swissregulon__sacCer__GLN3	5.39	0.0635	GATAd; GATAe; grn; pnr; srp (inferredBy_Orthology).		61	4692	Ahcy;AkhR;cDIP;CG10433;CG10472;CG10621;CG11594;CG14292;CG15255;CG15534;CG15553;CG16727;CG16758;CG17633;CG3106;CG31343;CG3332;CG33511;CG34040;CG34330;CG3609;CG3699;CG3739;CG3868;CG42235;CG42249;CG4467;CG4562;CG6283;CG6870;CG8249;CG8468;CG9510;CG9682;CG9896;CR31781;Cyp4s3;daw;GstD8;Hex-C;Jon65Aii;Jon65Aiii;Jon65Aiv;Jon99Cii;Mal-A1;Mal-A2;Mal-A4;Mal-A7;Nmdmc;Npc2d;Octbeta2R;plh;Rh4;Root;smp-30;Sodh-…
geneListName	cisbp__M4715	5.33	0.0629			58	4772	AkhR;cDIP;CG10433;CG10516;CG10621;CG11594;CG12224;CG13618;CG15255;CG15534;CG15553;CG16727;CG16758;CG17192;CG17633;CG31343;CG34040;CG34330;CG3609;CG3699;CG3739;CG4213;CG42235;CG4467;CG4562;CG6283;CG6870;CG8249;CG8468;CG9449;CG9510;CG9682;CG9896;Cpn;Cyp309a1;daw;GstD8;Hex-C;Jon65Aiii;Jon99Cii;Jon99Ciii;LManIII;Mal-A1;Mal-A2;Mal-A4;Nmdmc;Npc2d;Octbeta2R;plh;Rh4;Root;smp-30;Sodh-1;sug;tobi;Tsf1;yip7;…
geneListName	elemento__CTTATCAG	5.23	0.0620			60	4508	AkhR;cDIP;CG10433;CG10516;CG10621;CG11594;CG11911;CG12766;CG13618;CG15255;CG15534;CG16727;CG16758;CG17032;CG17633;CG31343;CG33511;CG34040;CG3609;CG3699;CG3739;CG3868;CG4213;CG4562;CG6283;CG6870;CG8249;CG8468;CG9510;CG9682;CG9896;Cpn;Cyp309a1;Cyp4s3;daw;GstD8;Hex-C;inaC;Jon65Aii;Jon65Aiii;Jon65Aiv;Jon99Cii;Jon99Ciii;Mal-A1;Mal-A2;Mal-A4;NAAT1;Nmdmc;Obp99a;Octbeta2R;plh;Rh4;Root;smp-30;sug;thetaTry…
geneListName	swissregulon__hs__GATA6.p2	5.10	0.0608	pnr (inferredBy_Orthology).	HLH3B; grn (inferredBy_MotifSimilarity_n_Orthology).	63	4419	Ahcy;AkhR;cDIP;CG10433;CG10472;CG10516;CG10621;CG10827;CG11594;CG11911;CG13618;CG14292;CG15255;CG15534;CG15553;CG16727;CG16758;CG17633;CG3106;CG31343;CG3332;CG33511;CG34040;CG34330;CG3609;CG3699;CG3739;CG3868;CG4213;CG42235;CG4467;CG4562;CG6283;CG6870;CG8249;CG8468;CG9449;CG9451;CG9510;CG9896;Cyp4s3;daw;Eip71CD;GstD8;Hex-C;Jon65Aiii;Jon65Aiv;Jon99Cii;Jon99Ciii;Mal-A1;Mal-A2;Mal-A4;Mal-A7;Nmdmc;Np…
geneListName	cisbp__M0782	5.05	0.0603	pnr (inferredBy_Orthology).	GATAe (inferredBy_MotifSimilarity).CycT; GATAd; HLH3B; grn; srp (inferredBy_MotifSimilarity_n_Orthology).	71	4840	Ahcy;AkhR;Atg4a;cDIP;CG10472;CG10516;CG10621;CG10827;CG11594;CG11911;CG13618;CG14292;CG15255;CG15534;CG15553;CG16727;CG16758;CG17192;CG17633;CG3106;CG31343;CG3332;CG3344;CG33511;CG34040;CG34330;CG3609;CG3699;CG3739;CG3868;CG4213;CG42249;CG4467;CG4562;CG6283;CG8468;CG9510;CG9682;CG9896;Cyp309a1;Cyp309a2;daw;Eip71CD;GstD5;GstD8;Hex-C;Irk3;Jon65Aii;Jon65Aiii;Jon65Aiv;Jon99Cii;Jon99Ciii;lambdaTry;LMa…
geneListName	cisbp__M0783	4.98	0.0596	grn (inferredBy_Orthology).	GATAd; GATAe; pnr; srp (inferredBy_MotifSimilarity_n_Orthology).	63	4859	Ahcy;AkhR;cDIP;CG10433;CG10472;CG10516;CG10621;CG10827;CG11911;CG15255;CG15534;CG16727;CG16758;CG17633;CG3106;CG31343;CG3332;CG3344;CG33511;CG34040;CG34330;CG3609;CG3699;CG3868;CG4213;CG42235;CG42249;CG4467;CG4562;CG6283;CG8249;CG8468;CG9449;CG9451;CG9682;CG9896;Cpn;dati;daw;Eip71CD;Gbeta76C;Hsc70-1;Irk3;Jon65Aii;Jon65Aiii;Jon65Aiv;Jon99Cii;Jon99Ciii;lambdaTry;Mal-A1;Mal-A2;Mal-A4;NAAT1;Npc2d;Oct…
geneListName	swissregulon__sacCer__PDR8	4.67	0.0568			7	208	CG13428;CG42235;CG9449;CG9451;Nmdmc;sug;Zip89B
geneListName	transfac_pro__M06853	4.66	0.0567			11	751	CG10472;CG10827;CG14292;CG34330;CG4467;inaC;Mal-A1;Nmdmc;plh;trpl;Zip89B
geneListName	elemento__CTTATCA	4.64	0.0565			59	4348	Ahcy;AkhR;cDIP;CG10184;CG10433;CG10472;CG10516;CG10621;CG10827;CG11594;CG12224;CG12766;CG13618;CG15255;CG15534;CG16727;CG16758;CG17192;CG17633;CG31343;CG3332;CG34040;CG34330;CG3609;CG3699;CG3739;CG4213;CG4467;CG4562;CG6283;CG6870;CG8468;CG9510;CG9682;CG9896;Cyp4s3;dati;daw;GstD8;Hex-C;inaC;Jon65Aiii;Jon99Cii;LManIII;Mal-A1;Mal-A2;Mal-A4;Nmdmc;Npc2d;Octbeta2R;plh;Rh4;Root;smp-30;sug;tobi;Tsf1;yip7…
geneListName	cisbp__M4982	4.63	0.0564	GATAd (directAnnotation).		41	2731	AkhR;cDIP;CG10472;CG10516;CG10621;CG11594;CG13618;CG15255;CG16727;CG16758;CG17633;CG31343;CG34040;CG34330;CG3609;CG3699;CG3739;CG4213;CG6283;CG6870;CG8468;CG9510;CG9896;daw;Eip71CD;GstD8;Hex-C;Jon65Aiii;Jon99Cii;Mal-A4;Nmdmc;Npc2d;Octbeta2R;plh;Rh4;Root;smp-30;Sodh-1;sug;tobi;Zip89B
geneListName	cisbp__M0788	4.60	0.0562		srp (inferredBy_MotifSimilarity).GATAd; GATAe; grn; pnr (inferredBy_MotifSimilarity_n_Orthology).	64	4840	Ahcy;AkhR;cDIP;CG10433;CG10472;CG10516;CG10621;CG10827;CG13618;CG14292;CG15255;CG15534;CG15553;CG16727;CG16758;CG17633;CG3106;CG31343;CG3332;CG3344;CG33511;CG34040;CG34330;CG3609;CG3699;CG3868;CG4213;CG42235;CG4467;CG4562;CG6283;CG8468;CG9449;CG9451;CG9896;Cyp309a1;Cyp309a2;daw;Eip71CD;GNBP-like3;GstD8;Hex-C;Jon65Aiii;Jon65Aiv;Jon99Cii;Jon99Ciii;lambdaTry;Mal-A1;Mal-A2;Mal-A4;Mal-A7;NAAT1;Nmdmc;N…
geneListName	homer__NBWGATAAGR_Gata4	4.57	0.0558	pnr (inferredBy_Orthology).	GATAe; grn; srp (inferredBy_MotifSimilarity).CycT; GATAd; HLH3B (inferredBy_MotifSimilarity_n_Orthology).	49	2789	Ahcy;AkhR;cDIP;CG10472;CG10516;CG10621;CG10827;CG11594;CG14292;CG15255;CG15534;CG15553;CG16727;CG16758;CG17633;CG3106;CG31343;CG33511;CG34040;CG34330;CG3609;CG3699;CG3868;CG4562;CG6283;CG8468;CG9510;CG9682;CG9896;daw;Eip71CD;GstD8;Hex-C;Jon65Aiii;Jon65Aiv;Jon99Cii;Jon99Ciii;Mal-A1;Mal-A2;Mal-A4;Nmdmc;Octbeta2R;plh;Rh4;Root;smp-30;sug;tobi;Zip89B
geneListName	taipale__GATA3_full_AGATAANN	4.54	0.0556	grn (inferredBy_Orthology).	pnr; srp (inferredBy_MotifSimilarity).CycT; GATAd; GATAe; HLH3B; Sirt6 (inferredBy_MotifSimilarity_n_Orthology).	68	4654	Ahcy;AkhR;Atg4a;cDIP;CG10433;CG10472;CG10516;CG10621;CG10827;CG11594;CG11911;CG14292;CG15255;CG15534;CG15553;CG16727;CG16758;CG17192;CG17633;CG3106;CG31343;CG3332;CG3344;CG33511;CG34040;CG34330;CG3609;CG3699;CG3739;CG3868;CG42249;CG4467;CG4562;CG6283;CG8468;CG9449;CG9451;CG9510;CG9682;CG9896;Cyp4s3;daw;Eip71CD;GstD8;Hex-C;Jon65Aiii;Jon65Aiv;Jon99Cii;Jon99Ciii;lambdaTry;LManIII;Mal-A1;Mal-A2;Mal-A…
geneListName	scertf__badis.PDR8	4.52	0.0554			7	249	CG13428;CG42235;CG9449;CG9451;Nmdmc;sug;Zip89B
geneListName	flyfactorsurvey__GATAd_SANGER_5_FBgn0032223	4.50	0.0553	GATAd (directAnnotation).		44	2968	Ahcy;AkhR;cDIP;CG10472;CG10516;CG10621;CG11594;CG13618;CG15255;CG15534;CG16727;CG16758;CG17633;CG31343;CG34040;CG34330;CG3609;CG3699;CG3739;CG4213;CG6283;CG6870;CG8468;CG9510;CG9682;CG9896;daw;Eip71CD;GstD8;Hex-C;Jon65Aiii;Jon99Cii;Mal-A4;Nmdmc;Npc2d;Octbeta2R;plh;Rh4;Root;smp-30;Sodh-1;sug;tobi;Zip89B
geneListName	transfac_pro__M07635	4.49	0.0551		Mitf; SREBP; cwo; cyc; tgo (inferredBy_MotifSimilarity).Mondo; Usf; bigmax; cnc (inferredBy_MotifSimilarity_n_Orthology).	11	626	CG10433;CG10827;CG3332;CG4467;CG8468;Cpn;CR31781;Octbeta2R;plh;sosie;yip7
geneListName	transfac_public__M00077	4.48	0.0551	grn (inferredBy_Orthology).		55	4054	Ahcy;AkhR;CG10433;CG10472;CG10621;CG10827;CG11911;CG14292;CG15534;CG16727;CG16758;CG17633;CG3106;CG31343;CG3344;CG33511;CG34040;CG34330;CG3609;CG3699;CG3739;CG3868;CG42249;CG4562;CG6283;CG8249;CG8468;CG9449;CG9451;CG9896;Cyp4s3;dati;daw;GstD5;GstD8;inaC;Irk3;Jon65Aiii;Jon65Aiv;lambdaTry;Mal-A1;Mal-A2;Mal-A4;NAAT1;Npc2d;Octbeta2R;plh;Ptp36E;Rh4;Root;smp-30;Sodh-1;sug;trpl;Zip89B
geneListName	taipale__GATA4_DBD_AGATAANN	4.48	0.0551	pnr (inferredBy_Orthology).	grn; srp (inferredBy_MotifSimilarity).CycT; GATAd; GATAe; HLH3B; Sirt6 (inferredBy_MotifSimilarity_n_Orthology).	64	4054	Ahcy;AkhR;Atg4a;cDIP;CG10472;CG10516;CG10621;CG10827;CG11594;CG11911;CG14292;CG15255;CG15534;CG15553;CG16727;CG16758;CG17192;CG17633;CG3106;CG31343;CG3332;CG3344;CG33511;CG34040;CG34330;CG3609;CG3699;CG3739;CG42235;CG42249;CG4467;CG4562;CG6283;CG8468;CG9510;CG9682;CG9896;Cyp4s3;daw;Eip71CD;GstD8;Hex-C;Jon65Aiii;Jon65Aiv;Jon99Cii;Jon99Ciii;lambdaTry;LManIII;Mal-A1;Mal-A2;Mal-A4;Mal-A7;NAAT1;Npc2d;…
geneListName	scertf__harbison.GLN3	4.47	0.0550	GATAd; GATAe; grn; pnr; srp (inferredBy_Orthology).		66	4654	Ahcy;AkhR;Atg4a;cDIP;CG10433;CG10472;CG10516;CG10621;CG10827;CG11594;CG11911;CG12766;CG15255;CG15534;CG16727;CG16758;CG17192;CG17633;CG18268;CG18585;CG3106;CG31343;CG3332;CG3344;CG33511;CG34040;CG34330;CG3609;CG3699;CG3739;CG3868;CG42235;CG42821;CG4467;CG4562;CG6283;CG8249;CG8468;CG9510;CG9682;CG9896;Cyp4s3;daw;GstD5;GstD8;Hex-C;Jon65Aiii;Jon65Aiv;Jon99Cii;Jon99Ciii;Mal-A1;Mal-A2;Mal-A4;NAAT1;Npc…
geneListName	cisbp__M5477	4.45	0.0548	grn (inferredBy_Orthology).	pnr; srp (inferredBy_MotifSimilarity).CycT; GATAd; GATAe; HLH3B; Sirt6 (inferredBy_MotifSimilarity_n_Orthology).	69	4840	Ahcy;AkhR;Atg4a;cDIP;CG10433;CG10472;CG10516;CG10621;CG10827;CG11594;CG11911;CG14292;CG15255;CG15534;CG15553;CG16727;CG16758;CG17192;CG17633;CG3106;CG31343;CG3332;CG3344;CG33511;CG34040;CG34330;CG3609;CG3699;CG3739;CG3868;CG42249;CG4467;CG4562;CG6283;CG8468;CG9449;CG9451;CG9510;CG9682;CG9896;Cyp4s3;daw;Eip71CD;GstD8;Hex-C;Jon65Aiii;Jon65Aiv;Jon99Cii;Jon99Ciii;lambdaTry;LManIII;Mal-A1;Mal-A2;Mal-A…
geneListName	cisbp__M0795	4.42	0.0545	GATAd; GATAe; grn; pnr; srp (inferredBy_Orthology).		64	4654	Ahcy;AkhR;Atg4a;cDIP;CG10184;CG10472;CG10516;CG10621;CG10827;CG11594;CG13618;CG14292;CG15255;CG15553;CG16727;CG16758;CG17192;CG17633;CG3106;CG31343;CG3332;CG33511;CG34040;CG34330;CG3609;CG3699;CG3739;CG4213;CG42235;CG42249;CG4467;CG4562;CG6283;CG8468;CG9510;CG9682;CG9896;daw;Eip71CD;GstD8;Hex-C;Jon65Aiii;Jon65Aiv;Jon99Cii;Jon99Ciii;lambdaTry;Mal-A1;Mal-A2;Mal-A4;Mal-A7;NAAT1;Nmdmc;Npc2d;Octbeta2R…
geneListName	cisbp__M3326	4.38	0.0542	grn (inferredBy_Orthology).		54	4063	Ahcy;AkhR;CG10433;CG10472;CG10621;CG10827;CG11911;CG14292;CG15534;CG16727;CG16758;CG17633;CG3106;CG31343;CG3344;CG33511;CG34040;CG34330;CG3609;CG3699;CG3739;CG3868;CG42249;CG4562;CG6283;CG8249;CG8468;CG9449;CG9451;CG9896;Cyp4s3;dati;daw;GstD5;GstD8;inaC;Irk3;Jon65Aiii;Jon65Aiv;lambdaTry;Mal-A1;Mal-A2;Mal-A4;NAAT1;Npc2d;Octbeta2R;plh;Rh4;Root;smp-30;Sodh-1;sug;trpl;Zip89B
geneListName	yetfasco__YER040W_539	4.33	0.0537	GATAd; GATAe; grn; pnr; srp (inferredBy_Orthology).		48	3511	AkhR;cDIP;CG10472;CG10516;CG10827;CG11911;CG14292;CG15255;CG15534;CG15553;CG16758;CG17192;CG17633;CG3106;CG31343;CG3344;CG33511;CG34040;CG34330;CG3609;CG3699;CG3868;CG42249;CG4467;CG4562;CG6283;CG8468;CG9449;CG9451;CG9896;daw;Eip71CD;GstD5;Hsc70-1;Jon65Aiii;Jon65Aiv;lambdaTry;Mal-A1;Mal-A2;Mal-A4;NAAT1;Npc2d;Octbeta2R;plh;Root;sug;tobi;Zip89B
geneListName	cisbp__M5478	4.32	0.0536	pnr (inferredBy_Orthology).	grn; srp (inferredBy_MotifSimilarity).CycT; GATAd; GATAe; HLH3B; Sirt6 (inferredBy_MotifSimilarity_n_Orthology).	62	4001	Ahcy;AkhR;Atg4a;cDIP;CG10472;CG10516;CG10621;CG10827;CG11594;CG11911;CG14292;CG15255;CG15534;CG15553;CG16727;CG16758;CG17192;CG17633;CG3106;CG31343;CG3332;CG3344;CG33511;CG34040;CG34330;CG3609;CG3699;CG42235;CG42249;CG4467;CG4562;CG6283;CG8468;CG9510;CG9682;CG9896;Cyp4s3;daw;Eip71CD;GstD8;Hex-C;Jon65Aiii;Jon65Aiv;Jon99Cii;Jon99Ciii;lambdaTry;LManIII;Mal-A1;Mal-A2;Mal-A4;Mal-A7;Npc2d;Octbeta2R;plh…
geneListName	cisbp__M4660	4.31	0.0535	grn (inferredBy_Orthology).	HLH3B; pnr (inferredBy_MotifSimilarity_n_Orthology).	64	4654	Ahcy;AkhR;cDIP;CG10433;CG10472;CG10516;CG10621;CG11594;CG11911;CG14292;CG15255;CG15553;CG16727;CG16758;CG17633;CG3106;CG31343;CG3332;CG3344;CG33511;CG34040;CG3609;CG3699;CG3739;CG3868;CG42821;CG4467;CG4562;CG6283;CG6870;CG8468;CG9510;CG9682;CG9896;Cyp309a1;Cyp309a2;Cyp4s3;daw;Eip71CD;GNBP-like3;GstD8;Hex-C;Irk3;Jon65Aii;Jon65Aiii;Jon65Aiv;Jon99Cii;Jon99Ciii;Mal-A2;Mal-A4;Mal-A7;Nmdmc;Npc2d;Octbet…
geneListName	cisbp__M5476	4.29	0.0533	grn (inferredBy_Orthology).	pnr; srp (inferredBy_MotifSimilarity).CycT; GATAd; GATAe; HLH3B (inferredBy_MotifSimilarity_n_Orthology).	68	4840	Ahcy;AkhR;Atg4a;cDIP;CG10433;CG10472;CG10516;CG10621;CG10827;CG11911;CG12766;CG14292;CG15255;CG15534;CG15553;CG16727;CG16758;CG17192;CG17633;CG3106;CG31343;CG3332;CG3344;CG33511;CG34040;CG34330;CG3609;CG3699;CG3739;CG3868;CG42235;CG42249;CG4467;CG4562;CG6283;CG8468;CG9449;CG9451;CG9682;CG9896;Cyp4s3;daw;Eip71CD;GstD5;GstD8;Hex-C;Jon65Aiii;Jon65Aiv;Jon99Cii;Jon99Ciii;lambdaTry;LManIII;Mal-A1;Mal-A…
geneListName	taipale__GATA3_DBD_AGATAANN_repr	4.27	0.0531	grn (inferredBy_Orthology).	pnr; srp (inferredBy_MotifSimilarity).GATAd; GATAe; HLH3B (inferredBy_MotifSimilarity_n_Orthology).	65	4580	Ahcy;AkhR;Atg4a;cDIP;CG10433;CG10472;CG10516;CG10621;CG10827;CG11911;CG12766;CG14292;CG15255;CG15534;CG15553;CG16758;CG17192;CG17633;CG3106;CG31343;CG3332;CG3344;CG33511;CG34040;CG34330;CG3609;CG3699;CG3739;CG3868;CG42235;CG42249;CG4467;CG4562;CG6283;CG8468;CG9449;CG9451;CG9682;CG9896;daw;Eip71CD;GstD5;GstD8;Hex-C;Jon65Aiii;Jon65Aiv;Jon99Cii;Jon99Ciii;lambdaTry;LManIII;Mal-A1;Mal-A2;Mal-A4;Mal-A7…
geneListName	swissregulon__sacCer__DAL80	4.26	0.0530	GATAd; GATAe; grn; pnr; srp (inferredBy_Orthology).		48	3256	AkhR;cDIP;CG10184;CG10433;CG10472;CG10516;CG10621;CG10827;CG11911;CG13618;CG15255;CG15534;CG16758;CG17633;CG18585;CG3106;CG31343;CG33511;CG34040;CG34330;CG3609;CG3699;CG4562;CG6283;CG8249;CG8468;CG9682;CG9896;daw;Hex-C;inaC;Jon65Aiii;Jon65Aiv;Jon99Cii;Mal-A1;Mal-A2;Mal-A4;NAAT1;Nmdmc;Octbeta2R;plh;Rh4;Root;sug;thetaTry;tobi;trpl;Zip89B
geneListName	stark__ANHDDBHGATAASSDNNB	4.24	0.0528	pnr (directAnnotation).	GATAd; GATAe; grn; srp (inferredBy_MotifSimilarity_n_Orthology).	43	3256	Ahcy;AkhR;Atg4a;cDIP;CG10433;CG10472;CG10621;CG11594;CG15534;CG16727;CG16758;CG3332;CG34040;CG34330;CG3609;CG3699;CG4467;CG4562;CG6870;CG8249;CG9090;CG9449;CG9451;CR31781;dati;daw;dnd;GstD8;Hex-C;inaC;Jon65Aiii;Jon99Cii;Mal-A1;Mal-A2;Obp44a;Octbeta2R;plh;Root;smp-30;sug;tobi;trpl;Zip89B
geneListName	homer__CAGATAAGGN_Gata1	4.20	0.0525	grn (inferredBy_Orthology).	CycT; HLH3B; pnr (inferredBy_MotifSimilarity_n_Orthology).	58	4120	Ahcy;AkhR;cDIP;CG10433;CG10472;CG10516;CG10621;CG11594;CG13618;CG14292;CG15255;CG15553;CG16727;CG16758;CG17633;CG3106;CG31343;CG3332;CG3344;CG33511;CG34040;CG34330;CG3609;CG3699;CG3868;CG4467;CG4562;CG6283;CG6870;CG8468;CG9510;CG9682;CG9896;CR31781;daw;Eip71CD;GNBP-like3;GstD8;Hex-C;Jon65Aiii;Jon65Aiv;Jon99Cii;Jon99Ciii;Mal-A1;Mal-A2;Mal-A4;Mal-A7;Nmdmc;Npc2d;Octbeta2R;plh;Rh4;Root;smp-30;sosie;s…
geneListName	swissregulon__hs__ARNT_ARNT2_BHLHB2_MAX_MYC_USF1.p2	4.20	0.0524	Max; Myc; Usf; tgo (inferredBy_Orthology).	Clk; gce (inferredBy_MotifSimilarity).	11	775	CG10433;CG31343;CG3332;CG4467;CG8468;Cpn;CR31781;Octbeta2R;plh;sosie;trpl
geneListName	transfac_pro__M07883	4.12	0.0517	Dif (directAnnotation).	dl (inferredBy_MotifSimilarity).	10	549	CG11911;CG34040;CG4562;daw;GNBP-like3;Jon65Aiii;Mal-A4;Nmdmc;sosie;sug
geneListName	transfac_pro__M07856	4.11	0.0517	BtbVII (directAnnotation).		9	582	CG16758;CG4467;CG8468;Cyp4s3;dati;Hsc70-1;NAAT1;Ptp36E;trpl
geneListName	cisbp__M4983	4.09	0.0515	GATAe (directAnnotation).	srp (inferredBy_MotifSimilarity).GATAd; grn; pnr (inferredBy_MotifSimilarity_n_Orthology).	66	4999	Ahcy;AkhR;cDIP;CG10184;CG10433;CG10472;CG10516;CG10621;CG10827;CG11594;CG13618;CG14292;CG15255;CG15534;CG16727;CG16758;CG17192;CG17633;CG3106;CG31343;CG3344;CG33511;CG34040;CG34330;CG3609;CG3699;CG3739;CG4213;CG42235;CG4562;CG6283;CG6870;CG8468;CG9510;CG9682;CG9896;Cyp4s3;daw;Eip71CD;GNBP-like3;GstD5;GstD8;Hex-C;Jon65Aiii;Jon65Aiv;Jon99Cii;Jon99Ciii;lambdaTry;LManIII;Mal-A1;Mal-A2;Mal-A4;Mal-A7;N…
geneListName	cisbp__M6258	4.09	0.0514	pnr (inferredBy_Orthology).		64	4934	Ahcy;AkhR;cDIP;CG10472;CG10516;CG10621;CG10827;CG11911;CG14292;CG15255;CG15534;CG15553;CG16727;CG16758;CG17192;CG17633;CG3106;CG31343;CG3332;CG3344;CG33511;CG34040;CG34330;CG3609;CG3699;CG3868;CG42235;CG4467;CG4562;CG6283;CG8468;CG9449;CG9510;CG9682;CG9896;Cyp309a1;Cyp309a2;daw;Eip71CD;Gbeta76C;GstD5;Hex-C;Hsc70-1;inaC;Irk3;Jon65Aiii;Jon65Aiv;Jon99Cii;lambdaTry;LManIII;Mal-A1;Mal-A2;Mal-A4;NAAT1;…
geneListName	transfac_pro__M06749	4.07	0.0513	CG5245 (inferredBy_Orthology).		18	1240	CG10827;CG3332;CG34040;CG4467;CG7881;CG8468;CG9449;CG9451;dati;Jon65Aiii;Mal-A7;Nmdmc;Octbeta2R;Rh4;Root;thetaTry;trpl;Zip89B
geneListName	transfac_pro__M06928	4.07	0.0513	Dad (inferredBy_Orthology).		9	512	CG14292;CG42235;CR31781;Jon65Aiii;lcs;Obp44a;Octbeta2R;plh;Root
geneListName	tfdimers__MD00163	4.07	0.0513	usp (inferredBy_Orthology).		58	4934	Ahcy;AkhR;cDIP;CG10433;CG10472;CG10516;CG10621;CG10827;CG11911;CG15553;CG16727;CG16758;CG17192;CG17633;CG31343;CG34040;CG34330;CG3609;CG3699;CG3739;CG3868;CG42821;CG4467;CG4562;CG6283;CG8249;CG8468;CG9449;CG9451;CG9510;CG9682;CG9896;CR31781;Cyp4s3;dati;daw;GNBP-like3;Hex-C;Jon65Aiii;Jon65Aiv;Jon99Cii;Jon99Ciii;lambdaTry;Mal-A1;Mal-A2;Mal-A4;Mal-A7;Npc2d;Octbeta2R;plh;Root;smp-30;sosie;sug;tobi;tr…
geneListName	taipale__GATA5_DBD_AGATAANN	4.06	0.0512	pnr (inferredBy_Orthology).	grn; srp (inferredBy_MotifSimilarity).GATAd; GATAe; HLH3B (inferredBy_MotifSimilarity_n_Orthology).	61	3877	Ahcy;AkhR;Atg4a;cDIP;CG10472;CG10516;CG10621;CG10827;CG11911;CG14292;CG15255;CG15534;CG15553;CG16727;CG16758;CG17192;CG17633;CG3106;CG31343;CG3332;CG33511;CG34040;CG34330;CG3609;CG3699;CG3739;CG42235;CG42249;CG4467;CG4562;CG6283;CG8468;CG9510;CG9682;CG9896;Cyp4s3;daw;Eip71CD;GstD8;Hex-C;Jon65Aiii;Jon65Aiv;Jon99Cii;Jon99Ciii;lambdaTry;LManIII;Mal-A1;Mal-A2;Mal-A4;Mal-A7;NAAT1;Octbeta2R;plh;Rh4;Roo…
geneListName	cisbp__M0797	4.05	0.0511	GATAd; GATAe; grn; pnr; srp (inferredBy_Orthology).		46	3976	AkhR;cDIP;CG10472;CG10621;CG10827;CG15255;CG15534;CG16727;CG16758;CG17633;CG3106;CG31343;CG3332;CG33511;CG34040;CG34330;CG3609;CG3699;CG3868;CG42249;CG4467;CG4562;CG6283;CG7881;CG8249;CG8468;CG9449;CG9451;CG9896;dati;daw;Eip71CD;Jon65Aiii;Jon65Aiv;Jon99Cii;lambdaTry;Mal-A1;Mal-A2;Mal-A4;NAAT1;Octbeta2R;plh;smp-30;sug;tobi;Zip89B
geneListName	swissregulon__sacCer__GZF3	4.05	0.0511	GATAd; GATAe; grn; pnr; srp (inferredBy_Orthology).		47	3768	AkhR;cDIP;CG10433;CG10472;CG10516;CG10621;CG11594;CG12766;CG15255;CG16727;CG16758;CG17633;CG3332;CG34330;CG3609;CG3699;CG3868;CG4467;CG4562;CG6283;CG6870;CG8249;CG8468;CG9449;CG9451;CG9510;CG9896;CR31781;daw;GstD8;Hex-C;Jon65Aiii;Jon65Aiv;Jon99Cii;LManIII;Mal-A1;Mal-A2;Mal-A4;Nmdmc;Octbeta2R;plh;Rh4;Root;smp-30;sug;tobi;Zip89B
geneListName	transfac_pro__M07633	4.01	0.0507	bigmax (directAnnotation).	Mondo; SREBP (inferredBy_MotifSimilarity).Mitf; Usf; tgo (inferredBy_MotifSimilarity_n_Orthology).	6	283	CG31343;CG3332;CG4467;CR31781;Octbeta2R;plh
geneListName	hocomoco__GATA6_HUMAN.H10MO.S	3.99	0.0505	pnr (inferredBy_Orthology).		63	4840	Ahcy;AkhR;cDIP;CG10472;CG10516;CG10621;CG10827;CG11911;CG14292;CG15255;CG15553;CG16727;CG16758;CG17192;CG17633;CG3106;CG31343;CG3332;CG3344;CG33511;CG34040;CG34330;CG3609;CG3699;CG3868;CG42235;CG4467;CG4562;CG6283;CG8468;CG9449;CG9510;CG9682;CG9896;Cyp309a1;Cyp309a2;daw;Eip71CD;Gbeta76C;GstD5;Hex-C;Hsc70-1;inaC;Irk3;Jon65Aiii;Jon65Aiv;Jon99Cii;lambdaTry;LManIII;Mal-A1;Mal-A2;Mal-A4;NAAT1;Npc2d;Oc…
geneListName	scertf__badis.YNR063W	3.98	0.0505			6	151	CG10827;CG42235;CG9449;CG9451;Nmdmc;sug
geneListName	cisbp__M4797	3.98	0.0504	Cf2 (directAnnotation).		10	704	cDIP;CG16727;CG3332;CG4467;CG8468;Cyp4s3;dati;Hsc70-1;NAAT1;Octbeta2R
geneListName	taipale_tf_pairs__ARNTL_PITX1_CACGTGNNNRGATTAN_CAP_repr	3.96	0.0503	Ptx1; cyc (inferredBy_Orthology).		17	1403	CG10472;CG10827;CG15553;CG16758;CG31343;CG3332;CG3739;CG4467;CG7881;CG8468;Cpn;CR31781;daw;Nmdmc;Octbeta2R;plh;sosie
geneListName	cisbp__M5479	3.95	0.0502	pnr (inferredBy_Orthology).	grn; srp (inferredBy_MotifSimilarity).GATAd; GATAe; HLH3B (inferredBy_MotifSimilarity_n_Orthology).	61	3967	Ahcy;AkhR;Atg4a;cDIP;CG10472;CG10516;CG10621;CG10827;CG11911;CG14292;CG15255;CG15534;CG15553;CG16727;CG16758;CG17192;CG17633;CG3106;CG31343;CG3332;CG33511;CG34040;CG34330;CG3609;CG3699;CG3739;CG42235;CG42249;CG4467;CG4562;CG6283;CG8468;CG9510;CG9682;CG9896;Cyp4s3;daw;Eip71CD;GstD8;Hex-C;Jon65Aiii;Jon65Aiv;Jon99Cii;Jon99Ciii;lambdaTry;LManIII;Mal-A1;Mal-A2;Mal-A4;Mal-A7;NAAT1;Octbeta2R;plh;Rh4;Roo…
geneListName	jaspar__MA0432.1	3.93	0.0500			6	124	CG10827;CG42235;CG9449;CG9451;Nmdmc;sug
geneListName	transfac_pro__M01917	3.92	0.0499			6	126	CG10827;CG42235;CG9449;CG9451;Nmdmc;sug
geneListName	homer__AGATAASR_GATA3	3.92	0.0499	grn (inferredBy_Orthology).	srp (inferredBy_MotifSimilarity).pnr (inferredBy_MotifSimilarity_n_Orthology).	62	4692	Ahcy;AkhR;Atg4a;cDIP;CG10472;CG10516;CG10621;CG10827;CG11911;CG14292;CG15255;CG15553;CG16727;CG16758;CG17192;CG17633;CG3106;CG31343;CG3332;CG3344;CG33511;CG34040;CG34330;CG3609;CG3699;CG3739;CG42235;CG4467;CG4562;CG6283;CG8468;CG9510;CG9682;CG9896;daw;Eip71CD;GstD5;GstD8;Hex-C;Jon65Aiii;Jon65Aiv;Jon99Cii;Jon99Ciii;lambdaTry;LManIII;Mal-A1;Mal-A2;Mal-A4;Mal-A7;Nmdmc;Npc2d;Octbeta2R;plh;Rh4;Root;sm…
geneListName	stark__ATCTNATC	3.90	0.0497			50	4840	Atg4a;cDIP;CG10472;CG10516;CG10621;CG10827;CG11594;CG14292;CG15255;CG17032;CG17192;CG18268;CG18585;CG31343;CG3332;CG3344;CG33511;CG34040;CG3609;CG3699;CG3739;CG3868;CG42235;CG4467;CG4562;CG6283;CG8249;CG8468;CG9449;CG9451;CG9896;Cpn;daw;Gbeta76C;Hex-C;inaC;Jon65Aii;Jon65Aiii;Jon65Aiv;Jon99Ciii;Mal-A4;NAAT1;Npc2d;Octbeta2R;smp-30;sosie;thetaTry;trpl;yip7;Zip89B
geneListName	predrem__nrMotif1710	3.88	0.0495			9	654	AkhR;CG10827;CG16727;CG42235;CG9896;dati;Obp44a;Octbeta2R;sug
geneListName	transfac_pro__M07729	3.87	0.0494	grn (directAnnotation).	GATAe (inferredBy_MotifSimilarity).	39	3712	cDIP;CG10472;CG10621;CG1077;CG15255;CG15399;CG15553;CG16758;CG17633;CG31343;CG3332;CG3344;CG3739;CG4467;CG7025;CG8468;CG9896;Cpn;Cyp309a2;dati;daw;Eip71CD;Gbeta76C;GstD2;Irk3;Jon65Aii;Jon65Aiii;Jon99Cii;Jon99Ciii;lcs;NAAT1;ninaC;Octbeta2R;smp-30;Sodh-1;sosie;sug;trpl;Zip89B
geneListName	swissregulon__sacCer__YNR063W	3.87	0.0494			4	47	CG42235;CG9449;CG9451;Nmdmc
geneListName	cisbp__M5993	3.86	0.0494		E(spl)m5-HLH; SREBP; bigmax; cwo; cyc; h; tgo (inferredBy_MotifSimilarity).Mitf; Mondo; Usf; cnc (inferredBy_MotifSimilarity_n_Orthology).	15	993	CG10433;CG10827;CG15553;CG3332;CG4467;CG8468;CG9449;Cpn;CR31781;Jon99Ciii;ninaC;Octbeta2R;plh;sosie;yip7
geneListName	transfac_pro__M01911	3.86	0.0494			15	895	CG10433;CG10827;CG15553;CG31343;CG3332;CG3739;CG4467;CG9449;Cpn;CR31781;Jon99Ciii;ninaC;Octbeta2R;plh;yip7
geneListName	flyfactorsurvey__srp_SANGER_5_FBgn0003507	3.86	0.0494	srp (directAnnotation).	GATAe; grn (inferredBy_MotifSimilarity).GATAd; pnr (inferredBy_MotifSimilarity_n_Orthology).	47	3048	Ahcy;AkhR;cDIP;CG10433;CG10472;CG10516;CG10621;CG10827;CG11594;CG15255;CG16727;CG16758;CG17633;CG3106;CG31343;CG33511;CG34040;CG34330;CG3609;CG3699;CG3739;CG4562;CG6283;CG8468;CG9510;CG9682;CG9896;daw;GstD8;Hex-C;Jon65Aiii;Jon65Aiv;Jon99Cii;Mal-A1;Mal-A2;Mal-A4;Mal-A7;Nmdmc;Npc2d;Octbeta2R;plh;Rh4;Root;smp-30;sug;tobi;Zip89B
geneListName	taipale__Bhlhb2_DBD_NKCACGTGMN	3.86	0.0493		E(spl)m5-HLH; SREBP; bigmax; cwo; cyc; h; tgo (inferredBy_MotifSimilarity).Mitf; Mondo; Usf; cnc (inferredBy_MotifSimilarity_n_Orthology).	19	1547	CG10433;CG10827;CG15553;CG31343;CG3332;CG3739;CG4213;CG4467;CG8468;CG9449;CG9896;Cpn;CR31781;Jon99Ciii;ninaC;Octbeta2R;plh;sosie;yip7
geneListName	transfac_pro__M04713	3.85	0.0493	grn (inferredBy_Orthology).	CycT; HLH3B; pnr (inferredBy_MotifSimilarity_n_Orthology).	69	4966	Ahcy;AkhR;cDIP;CG10433;CG10472;CG10516;CG10621;CG10827;CG11594;CG11911;CG12766;CG14292;CG15255;CG15534;CG15553;CG16727;CG16758;CG17633;CG3106;CG31343;CG3344;CG33511;CG34040;CG34330;CG3609;CG3699;CG3868;CG42235;CG4467;CG4562;CG6283;CG6870;CG8249;CG8468;CG9510;CG9682;CG9896;CR31781;Cyp309a1;Cyp309a2;Cyp4s3;daw;Eip71CD;GNBP-like3;GstD8;Hex-C;Jon65Aii;Jon65Aiii;Jon65Aiv;Jon99Cii;Jon99Ciii;Mal-A1;Mal-…
geneListName	transfac_pro__M07727	3.85	0.0493	GATAe (directAnnotation).	grn (inferredBy_MotifSimilarity).	48	4934	AkhR;Atg4a;cDIP;CG10472;CG10621;CG1077;CG15255;CG15399;CG15553;CG16727;CG16758;CG17192;CG17633;CG31343;CG3332;CG3344;CG3699;CG3739;CG3868;CG4467;CG4562;CG7025;CG7881;CG8468;CG9896;Cpn;Cyp309a2;dati;daw;GstD2;GstD8;Jon65Aii;Jon65Aiii;Jon65Aiv;Jon99Cii;Jon99Ciii;lcs;NAAT1;ninaC;Npc2d;Obp44a;Octbeta2R;smp-30;Sodh-1;sosie;sug;trpl;Zip89B
geneListName	flyfactorsurvey__GATAe_SANGER_5_FBgn0038391	3.85	0.0492	GATAe (directAnnotation).	srp (inferredBy_MotifSimilarity).GATAd; grn; pnr (inferredBy_MotifSimilarity_n_Orthology).	67	4989	Ahcy;AkhR;cDIP;CG10184;CG10433;CG10472;CG10516;CG10621;CG10827;CG11594;CG13618;CG14292;CG15255;CG15534;CG16727;CG16758;CG17192;CG17633;CG3106;CG31343;CG3332;CG3344;CG33511;CG34040;CG34330;CG3609;CG3699;CG3739;CG4213;CG42235;CG4562;CG6283;CG8468;CG9449;CG9451;CG9510;CG9682;CG9896;daw;Eip71CD;GNBP-like3;GstD8;Hex-C;inaC;Jon65Aiii;Jon65Aiv;Jon99Cii;Jon99Ciii;lambdaTry;LManIII;Mal-A1;Mal-A2;Mal-A4;Ma…
geneListName	transfac_pro__M02004	3.83	0.0491	grn (inferredBy_Orthology).	pnr (inferredBy_MotifSimilarity_n_Orthology).	60	4563	Ahcy;AkhR;cDIP;CG10472;CG10516;CG10621;CG14292;CG15255;CG15534;CG15553;CG16727;CG16758;CG17633;CG3106;CG31343;CG3332;CG33511;CG34040;CG3609;CG3699;CG3739;CG3868;CG42235;CG42249;CG4467;CG4562;CG6283;CG8468;CG9449;CG9510;CG9896;dati;daw;Eip71CD;GNBP-like3;Hex-C;inaC;Irk3;Jon65Aii;Jon65Aiii;Jon65Aiv;Jon99Cii;Jon99Ciii;Mal-A1;Mal-A2;Mal-A4;Mal-A7;Nmdmc;Npc2d;Octbeta2R;plh;Root;smp-30;Sodh-1;sug;tobi;…
geneListName	transfac_pro__M07728	3.83	0.0490	grn (directAnnotation).	srp (inferredBy_MotifSimilarity).GATAd; GATAe; pnr (inferredBy_MotifSimilarity_n_Orthology).	52	3712	Ahcy;AkhR;cDIP;CG10433;CG10472;CG10516;CG10621;CG10827;CG11594;CG13618;CG15255;CG16727;CG16758;CG17633;CG3106;CG31343;CG3332;CG33511;CG34040;CG34330;CG3609;CG3699;CG3739;CG4213;CG4562;CG6283;CG8468;CG9510;CG9682;CG9896;daw;Eip71CD;GstD8;Hex-C;Jon65Aiii;Jon65Aiv;Jon99Cii;Mal-A1;Mal-A2;Mal-A4;Mal-A7;Nmdmc;Npc2d;Octbeta2R;plh;Rh4;Root;smp-30;Sodh-1;sug;tobi;Zip89B
geneListName	transfac_pro__M07795	3.82	0.0490	ey (directAnnotation).		12	832	CG15255;CG4467;Gbeta76C;inaC;Irk3;Jon65Aiv;Jon99Ciii;ninaC;Npc2d;Obp44a;Octbeta2R;trpl
geneListName	jaspar__MA0281.1	3.81	0.0489			15	895	CG10433;CG10827;CG15553;CG31343;CG3332;CG3739;CG4467;CG9449;Cpn;CR31781;Jon99Ciii;ninaC;Octbeta2R;plh;yip7
geneListName	homer__NCCTTATCTC_Gata2	3.81	0.0489	grn (inferredBy_Orthology).	CycT; HLH3B; pnr (inferredBy_MotifSimilarity_n_Orthology).	57	4419	Ahcy;AkhR;cDIP;CG10433;CG10472;CG10516;CG10621;CG10827;CG11594;CG14292;CG15255;CG15553;CG16727;CG16758;CG17633;CG3106;CG31343;CG3332;CG3344;CG33511;CG34040;CG34330;CG3609;CG3699;CG4467;CG4562;CG6283;CG6870;CG8468;CG9510;CG9682;CG9896;CR31781;daw;Eip71CD;GNBP-like3;GstD8;Hex-C;Jon65Aiii;Jon65Aiv;Jon99Cii;Jon99Ciii;Mal-A1;Mal-A2;Mal-A4;Mal-A7;Nmdmc;Npc2d;Octbeta2R;plh;Rh4;Root;smp-30;sosie;sug;tobi…
geneListName	cisbp__M6053	3.73	0.0482	bigmax (inferredBy_Orthology).	SREBP (inferredBy_MotifSimilarity).Mitf; Mondo; Usf; tgo (inferredBy_MotifSimilarity_n_Orthology).	16	1182	CG10433;CG10827;CG15553;CG31343;CG3332;CG4467;CG8468;CG9896;Cpn;CR31781;Jon99Ciii;ninaC;Octbeta2R;plh;sosie;yip7
geneListName	taipale__BHLHB2_DBD_NKCACGTGMN	3.72	0.0481		SREBP; bigmax; cwo; cyc; tgo (inferredBy_MotifSimilarity).Mitf; Mondo; Usf; cnc; mio (inferredBy_MotifSimilarity_n_Orthology).	19	1547	CG10433;CG10827;CG15553;CG31343;CG3332;CG3739;CG4213;CG4467;CG8468;CG9449;CG9896;Cpn;CR31781;Jon99Ciii;ninaC;Octbeta2R;plh;sosie;yip7
geneListName	transfac_pro__M05354	3.71	0.0480	CG10979 (inferredBy_Orthology).		6	236	CG4467;Jon99Ciii;Obp99a;Octbeta2R;plh;Root
geneListName	yetfasco__TBP-TFIIB_1329	3.70	0.0478	Tbp; TfIIB; Trf; Trf2 (inferredBy_Orthology).	TfIIA-S; TfIIA-S-2 (inferredBy_MotifSimilarity_n_Orthology).	7	456	CG16758;CG17633;CG31343;Octbeta2R;Root;Sodh-1;tobi
geneListName	predrem__nrMotif743	3.70	0.0478			10	740	CG12224;CG3699;CG4467;Irk3;Jon65Aiii;Jon65Aiv;Octbeta2R;plh;sosie;Zip89B
geneListName	transfac_pro__M06939	3.69	0.0478	CG2116; CkIIalpha-i1 (inferredBy_Orthology).		8	533	CG17032;CG32444;CG3699;CG42235;Jon99Ciii;Octbeta2R;plh;Sodh-1
geneListName	transfac_pro__M01498	3.69	0.0478	GATAd; GATAe; grn; pnr; srp (inferredBy_Orthology).		50	3501	Ahcy;AkhR;cDIP;CG10433;CG10472;CG10516;CG10621;CG10827;CG11594;CG12766;CG15255;CG16727;CG16758;CG17032;CG17633;CG3106;CG34040;CG34330;CG3609;CG3699;CG4562;CG6283;CG6870;CG8249;CG8468;CG9510;CG9896;daw;Eip71CD;GstD8;Hex-C;Jon65Aiii;Jon65Aiv;Jon99Cii;Mal-A1;Mal-A2;Mal-A4;Nmdmc;Npc2d;Obp99a;Octbeta2R;plh;Rh4;Root;smp-30;sug;thetaTry;tobi;Tsf1;Zip89B
geneListName	transfac_pro__M07733	3.69	0.0478	srp (directAnnotation).	grn (inferredBy_MotifSimilarity).GATAd; GATAe; pnr (inferredBy_MotifSimilarity_n_Orthology).	68	4692	Ahcy;AkhR;Atg4a;cDIP;CG10433;CG10472;CG10516;CG10621;CG10827;CG11594;CG11911;CG12766;CG13618;CG15255;CG15534;CG16727;CG16758;CG17633;CG3106;CG31343;CG3332;CG3344;CG33511;CG34040;CG34330;CG3609;CG3699;CG3739;CG3868;CG4213;CG42249;CG4562;CG6283;CG8468;CG9449;CG9451;CG9510;CG9682;CG9896;Cyp309a1;Cyp309a2;Cyp4s3;daw;Eip71CD;GstD8;Hex-C;Jon65Aiii;Jon65Aiv;Jon99Cii;Jon99Ciii;lambdaTry;Mal-A1;Mal-A2;Mal…
geneListName	transfac_pro__M06971	3.69	0.0478			35	3824	CG10433;CG10516;CG15553;CG17032;CG32444;CG3332;CG34040;CG3699;CG42235;CG4467;CG6283;CG6870;CG9896;Cyp309a1;Cyp309a2;inaC;Jon65Aii;Jon65Aiii;Jon99Cii;Mal-A2;Mal-A7;Nmdmc;Npc2d;Octbeta2R;Peritrophin-15a;plh;Rh4;Root;smp-30;Sodh-1;sosie;sug;trpl;yip7;Zip89B
geneListName	transfac_pro__M04609	3.68	0.0477			9	531	cDIP;CG10827;CG14292;CG15553;Cpn;inaC;Npc2d;plh;Sodh-1
geneListName	transfac_pro__M00789	3.68	0.0477	grn; pnr (inferredBy_Orthology).		55	3535	Ahcy;AkhR;cDIP;CG10472;CG10516;CG10621;CG10827;CG11911;CG13618;CG14292;CG15255;CG15534;CG15553;CG16727;CG16758;CG17192;CG17633;CG3106;CG31343;CG3332;CG3344;CG33511;CG34040;CG34330;CG3609;CG3699;CG3739;CG3868;CG4467;CG4562;CG6283;CG8468;CG9682;CG9896;daw;GstD8;Hex-C;Jon65Aiii;Jon65Aiv;Jon99Cii;lambdaTry;Mal-A1;Mal-A2;Mal-A4;Mal-A7;NAAT1;Nmdmc;plh;Rh4;Root;smp-30;sug;tobi;yip7;Zip89B
geneListName	tiffin__TIFDMEM0000040	3.66	0.0475		pnr (inferredBy_MotifSimilarity_n_Orthology).	67	4934	Ahcy;AkhR;Atg4a;cDIP;CG10433;CG10472;CG10516;CG10621;CG10827;CG11594;CG12766;CG13618;CG14292;CG15255;CG15534;CG15553;CG16727;CG16758;CG17633;CG18268;CG3106;CG31343;CG3344;CG33511;CG34040;CG3609;CG3699;CG3739;CG42249;CG4562;CG6283;CG6870;CG8249;CG8468;CG9449;CG9451;CG9510;CG9682;CG9896;Cyp309a1;Cyp4s3;daw;Eip71CD;GstD8;Hex-C;Jon65Aiii;Jon65Aiv;Jon99Cii;Jon99Ciii;Mal-A1;Mal-A2;Mal-A4;Nmdmc;Npc2d;Ob…
geneListName	transfac_pro__M01877	3.66	0.0475	grn (inferredBy_Orthology).		62	4346	Ahcy;AkhR;cDIP;CG10433;CG10472;CG10516;CG10621;CG10827;CG11911;CG12766;CG13618;CG14292;CG15255;CG15534;CG15553;CG16758;CG17192;CG17633;CG3106;CG31343;CG3332;CG33511;CG34040;CG34330;CG3609;CG3699;CG3739;CG3868;CG4213;CG42235;CG42249;CG4467;CG4562;CG6283;CG8249;CG8468;CG9449;CG9451;CG9682;CG9896;daw;Eip71CD;GstD8;Hex-C;Jon65Aiii;Jon99Cii;lambdaTry;LManIII;Mal-A1;Mal-A2;Mal-A4;NAAT1;Npc2d;Octbeta2R;…
geneListName	transfac_pro__M06146	3.65	0.0475	CG5245 (inferredBy_Orthology).		6	283	CG3699;Cpn;CR31781;Octbeta2R;Root;Sodh-1
geneListName	cisbp__M1336	3.65	0.0474			64	4508	Ahcy;AkhR;cDIP;CG10433;CG10472;CG10621;CG10827;CG12766;CG13618;CG15255;CG15534;CG15553;CG16727;CG16758;CG17192;CG17633;CG3106;CG31343;CG3332;CG33511;CG34040;CG34330;CG3609;CG3699;CG3739;CG3868;CG4213;CG42235;CG42821;CG4467;CG4562;CG6283;CG7025;CG8468;CG9449;CG9451;CG9510;CG9896;Cpn;CR31781;daw;Eip71CD;GstD8;Hex-C;Jon65Aiii;Jon65Aiv;Jon99Cii;Jon99Ciii;Mal-A1;Mal-A2;Mal-A4;Mal-A7;NAAT1;Nmdmc;Npc2d;…
geneListName	cisbp__M0786	3.63	0.0472		pnr (inferredBy_MotifSimilarity_n_Orthology).	53	4419	AkhR;Atg4a;cDIP;CG10433;CG10516;CG10621;CG11594;CG13618;CG15255;CG15534;CG16727;CG16758;CG17192;CG17633;CG31343;CG3332;CG34330;CG3609;CG3699;CG3739;CG3868;CG4213;CG4562;CG6283;CG6870;CG8468;CG9510;CG9682;CG9896;Cyp309a1;Cyp309a2;Cyp4s3;daw;Eip71CD;Gbeta76C;GstD8;Hex-C;Jon65Aii;Jon65Aiii;Jon99Cii;lambdaTry;Mal-A4;Nmdmc;Npc2d;Octbeta2R;plh;Rh4;Root;smp-30;Sodh-1;sug;tobi;Zip89B
geneListName	cisbp__M5305	3.63	0.0472		SREBP; bigmax; cwo; cyc; tgo (inferredBy_MotifSimilarity).Mitf; Mondo; Usf; cnc; mio (inferredBy_MotifSimilarity_n_Orthology).	19	1547	CG10433;CG10827;CG15553;CG31343;CG3332;CG3739;CG4213;CG4467;CG8468;CG9449;CG9896;Cpn;CR31781;Jon99Ciii;ninaC;Octbeta2R;plh;sosie;yip7
geneListName	transfac_pro__M08792	3.62	0.0471	CG10348; ham (inferredBy_Orthology).	pnr (inferredBy_MotifSimilarity).	59	4740	Ahcy;cDIP;CG10472;CG10516;CG10621;CG10827;CG11594;CG12766;CG14292;CG15255;CG15553;CG16727;CG16758;CG17633;CG18268;CG3106;CG31343;CG3332;CG3344;CG33511;CG34040;CG3609;CG3699;CG3739;CG3868;CG4213;CG42235;CG4562;CG6283;CG8249;CG8468;CG9682;CG9896;Cyp309a1;Cyp4s3;dati;daw;GstD5;Hex-C;Hsc70-1;Jon65Aiii;Jon65Aiv;Jon99Cii;Jon99Ciii;Mal-A1;Mal-A2;Mal-A4;NAAT1;Npc2d;Octbeta2R;plh;Root;smp-30;sug;thetaTry;…
geneListName	swissregulon__sacCer__GAT1	3.60	0.0469	GATAd; GATAe; grn; pnr; srp (inferredBy_Orthology).		59	4654	Ahcy;AkhR;cDIP;CG10433;CG10472;CG10516;CG10621;CG10827;CG11594;CG14292;CG15255;CG15534;CG15553;CG16727;CG16758;CG17633;CG3106;CG31343;CG33511;CG34040;CG34330;CG3609;CG3699;CG3739;CG42235;CG42249;CG4562;CG6283;CG6870;CG8249;CG8468;CG9510;CG9682;CG9896;CR31781;daw;GstD8;Hex-C;Jon65Aiii;Jon65Aiv;Jon99Cii;Jon99Ciii;Mal-A1;Mal-A2;Mal-A4;Mal-A7;NAAT1;Nmdmc;Npc2d;Octbeta2R;plh;Rh4;Root;smp-30;sug;thetaT…
geneListName	cisbp__M3622	3.60	0.0469	Rel (inferredBy_Orthology).		9	654	CG17032;CG34040;CG4467;Cpn;daw;inaC;Jon65Aiii;Nmdmc;Zip89B
geneListName	taipale_tf_pairs__GCM2_MAX_NTRNGGGNNNCACGTG_CAP_repr	3.59	0.0468	Max; gcm; gcm2 (inferredBy_Orthology).		8	469	AkhR;cDIP;CG15553;CG4467;CR31781;Octbeta2R;plh;sug
geneListName	taipale__BHLHE41_full_GTCACGTGAC	3.59	0.0468		Mitf; SREBP; cwo; cyc; tgo (inferredBy_MotifSimilarity).Mondo; Usf; bigmax; cnc (inferredBy_MotifSimilarity_n_Orthology).	11	688	CG10433;CG3332;CG4467;CG8468;CG9449;Cpn;CR31781;Octbeta2R;plh;sosie;yip7
geneListName	cisbp__M3312	3.58	0.0468	grn (inferredBy_Orthology).		56	4371	Ahcy;AkhR;cDIP;CG10433;CG10472;CG10621;CG10827;CG11911;CG14292;CG16727;CG16758;CG17633;CG3106;CG31343;CG33511;CG34040;CG34330;CG3609;CG3699;CG3739;CG3868;CG4213;CG42249;CG4467;CG4562;CG6283;CG7025;CG8468;CG9449;CG9451;Cpn;CR31781;Cyp309a1;Cyp309a2;Cyp4s3;dati;daw;Hex-C;Hsc70-1;inaC;Jon65Aiii;Jon65Aiv;Jon99Cii;Jon99Ciii;Mal-A1;Mal-A2;Mal-A4;Npc2d;Octbeta2R;Peritrophin-15a;plh;Root;smp-30;sug;yip7;…
geneListName	jaspar__MA0354.1	3.57	0.0467			6	164	CG13428;CG42235;CG9449;CG9451;sug;Zip89B
geneListName	transfac_pro__M06604	3.57	0.0467	rn; sqz (inferredBy_Orthology).		22	2173	CG10184;CG10472;CG12224;CG15553;CG16727;CG3332;CG34330;CG4467;CG8468;CG9896;Cpn;Jon65Aiii;Jon99Ciii;lcs;Npc2d;Octbeta2R;plh;Ptp36E;Root;smp-30;Sodh-1;trpl
geneListName	factorbook__GATA1	3.56	0.0465	grn (inferredBy_Orthology).	CycT; GATAd; GATAe; HLH3B; Sirt6; pnr; srp (inferredBy_MotifSimilarity_n_Orthology).	63	4840	Ahcy;AkhR;cDIP;CG10433;CG10472;CG10516;CG10621;CG11594;CG13618;CG14292;CG15255;CG15553;CG16727;CG16758;CG17633;CG3106;CG31343;CG3332;CG3344;CG33511;CG34040;CG3609;CG3699;CG3739;CG3868;CG4467;CG4562;CG6283;CG6870;CG8468;CG9510;CG9682;CG9896;CR31781;Cyp309a1;Cyp309a2;Cyp4s3;daw;Eip71CD;GNBP-like3;GstD8;Hex-C;Irk3;Jon65Aiii;Jon65Aiv;Jon99Cii;Jon99Ciii;Mal-A2;Mal-A4;Mal-A7;Nmdmc;Npc2d;Octbeta2R;plh;R…
geneListName	transfac_pro__M01249	3.55	0.0465	sima (inferredBy_Orthology).		13	1012	AkhR;CG10827;CG15553;CG3739;CG4562;CR31781;daw;inaC;ninaC;Octbeta2R;plh;trpl;Zip89B
geneListName	transfac_pro__M07835	3.55	0.0465	unc-4 (directAnnotation).	CG11294; CG34367; CG9876; OdsH; Optix; bsh; hbn (inferredBy_MotifSimilarity).CG32532; Drgx; PHDP; Traf4 (inferredBy_MotifSimilarity_n_Orthology).	18	1547	CG10827;CG3106;CG4213;CG42235;CG4467;CG4562;Gbeta76C;inaC;Irk3;Jon65Aiv;Jon99Ciii;ninaC;Npc2d;Obp44a;Octbeta2R;plh;trpl;yip7
geneListName	elemento__TTCCGGC	3.55	0.0465			9	619	CG4467;CG9449;CG9451;dati;lambdaTry;Npc2d;Octbeta2R;Sodh-1;trpl
geneListName	homer__TCACGTGAYH_Cbf1	3.55	0.0465		SREBP; bigmax; cwo (inferredBy_MotifSimilarity).Mitf; Usf; tgo (inferredBy_MotifSimilarity_n_Orthology).	18	1437	CG10433;CG10827;CG15553;CG31343;CG3332;CG3739;CG4467;CG8468;CG9449;CG9896;Cpn;CR31781;Jon99Ciii;ninaC;Octbeta2R;plh;sosie;yip7
geneListName	yetfasco__YLR266C_528	3.55	0.0464			6	183	CG13428;CG42235;CG9449;CG9451;sug;Zip89B
geneListName	cisbp__M2159	3.54	0.0464			6	183	CG13428;CG42235;CG9449;CG9451;sug;Zip89B
geneListName	cisbp__M0179	3.53	0.0463	tgo (inferredBy_Orthology).		8	582	CG10827;CG15553;CG3332;Cpn;CR31781;daw;Octbeta2R;plh
geneListName	cisbp__M0500	3.53	0.0463	CG6769 (inferredBy_Orthology).		12	759	CG11911;CG12766;CG17032;CG3609;CG4467;CG9896;dati;Hex-C;Npc2d;Octbeta2R;plh;smp-30
geneListName	tfdimers__MD00173	3.52	0.0462			9	654	CG4213;CG4467;CG8468;Cyp309a1;Jon65Aiii;Octbeta2R;plh;Rh4;Root
geneListName	transfac_public__M00203	3.52	0.0462	grn (inferredBy_Orthology).		56	4654	Ahcy;AkhR;cDIP;CG10433;CG10472;CG10516;CG10621;CG13618;CG14292;CG15255;CG15553;CG16727;CG16758;CG17192;CG17633;CG31343;CG3332;CG33511;CG34040;CG34330;CG3609;CG3699;CG3739;CG3868;CG42235;CG4467;CG4562;CG6283;CG7881;CG8468;CG9682;Cpn;CR31781;dati;daw;GNBP-like3;GstD8;Hex-C;Hsc70-1;Jon65Aiii;Jon65Aiv;Jon99Cii;Mal-A2;Mal-A4;Mal-A7;Nmdmc;Octbeta2R;plh;Rh4;Root;smp-30;sug;thetaTry;tobi;trpl;Zip89B
geneListName	transfac_public__M00126	3.52	0.0462	grn (inferredBy_Orthology).		56	4538	Ahcy;AkhR;cDIP;CG10472;CG10621;CG10827;CG11911;CG14292;CG16727;CG16758;CG3106;CG31343;CG33511;CG34040;CG34330;CG3609;CG3699;CG3739;CG3868;CG4213;CG42249;CG4467;CG4562;CG6283;CG7025;CG8468;CG9449;CG9451;CG9896;Cpn;CR31781;Cyp309a1;Cyp309a2;Cyp4s3;dati;daw;Hex-C;Hsc70-1;inaC;Jon65Aiii;Jon65Aiv;Jon99Cii;Jon99Ciii;lambdaTry;Mal-A1;Mal-A2;Mal-A4;Npc2d;Octbeta2R;Peritrophin-15a;plh;Root;smp-30;sug;yip7…
geneListName	cisbp__M5994	3.50	0.0461		E(spl)m5-HLH; SREBP; cwo; cyc; h; tgo (inferredBy_MotifSimilarity).Mitf; Usf; cnc (inferredBy_MotifSimilarity_n_Orthology).	15	993	CG10433;CG10827;CG15553;CG3332;CG4467;CG8468;CG9449;Cpn;CR31781;Jon99Ciii;ninaC;Octbeta2R;plh;sosie;yip7
geneListName	cisbp__M5214	3.50	0.0460	srp (directAnnotation).	GATAe; grn (inferredBy_MotifSimilarity).GATAd; pnr (inferredBy_MotifSimilarity_n_Orthology).	53	3824	Ahcy;AkhR;cDIP;CG10433;CG10472;CG10516;CG10621;CG10827;CG11594;CG14292;CG15255;CG16727;CG16758;CG17633;CG3106;CG31343;CG3344;CG33511;CG34040;CG34330;CG3609;CG3699;CG4562;CG6283;CG6870;CG8468;CG9510;CG9682;CG9896;CR31781;daw;GstD8;Hex-C;Jon65Aiii;Jon65Aiv;Jon99Cii;Jon99Ciii;Mal-A1;Mal-A2;Mal-A4;Mal-A7;Nmdmc;Npc2d;Octbeta2R;plh;Rh4;Root;smp-30;Sodh-1;sug;tobi;yip7;Zip89B
geneListName	hocomoco__ALX4_HUMAN.H10MO.D	3.48	0.0459		Awh; CG11294; CG32532; CG34367; CG9876; Drgx; E5; Lim1; Lim3; OdsH; Optix; Pph13; Rx; Vsx1; Vsx2; al; ap; bsh; ems; en; hbn; otp; ro; slou; unc-4; unpg (inferredBy_MotifSimilarity).PHDP; Traf4; eve (inferredBy_MotifSimilarity_n_Orthology).	21	2072	CG10184;CG10827;CG3106;CG4213;CG42235;CG4467;CG4562;dati;Gbeta76C;inaC;Irk3;Jon65Aiv;Jon99Ciii;ninaC;Npc2d;Obp44a;Octbeta2R;plh;Rh4;trpl;yip7
geneListName	predrem__nrMotif254	3.47	0.0458			6	283	CG11911;CG15553;CG3609;CG4467;NAAT1;Octbeta2R
geneListName	transfac_pro__M06978	3.46	0.0457	salm; salr (inferredBy_Orthology).		47	4215	cDIP;CG10184;CG10433;CG10472;CG10621;CG11911;CG12224;CG15553;CG16727;CG16758;CG17032;CG17633;CG3106;CG31343;CG34040;CG3609;CG4213;CG42235;CG4467;CG4562;CG6283;CG6870;CG8249;CG8468;CR31781;daw;GNBP-like3;GstD8;Hex-C;Jon65Aiii;Jon65Aiv;Jon99Cii;Mal-A1;Mal-A2;Mal-A7;Nmdmc;Octbeta2R;plh;Rh4;Root;smp-30;Sodh-1;sosie;sug;trpl;Tsf1;Zip89B
geneListName	taipale__MLX_full_ATCACGTGAT	3.44	0.0455	bigmax (inferredBy_Orthology).	SREBP (inferredBy_MotifSimilarity).Mitf; Mondo; Usf; tgo (inferredBy_MotifSimilarity_n_Orthology).	15	1182	CG10433;CG10827;CG31343;CG3332;CG4467;CG8468;CG9896;Cpn;CR31781;Jon99Ciii;ninaC;Octbeta2R;plh;sosie;yip7
geneListName	elemento__CTTATCG	3.44	0.0455			36	2731	AkhR;cDIP;CG10184;CG10433;CG10472;CG10827;CG13618;CG15255;CG15534;CG15553;CG16758;CG17633;CG18268;CG18585;CG3106;CG34040;CG34330;CG3609;CG3699;CG8249;daw;Hex-C;Jon65Aiii;Jon65Aiv;Jon99Cii;Mal-A1;Mal-A2;Mal-A4;NAAT1;Octbeta2R;plh;Root;sug;thetaTry;trpl;Zip89B
geneListName	transfac_pro__M07761	3.43	0.0453	al (directAnnotation).	CG11294; CG32532; CG34367; CG9876; Drgx; OdsH; Optix; PHDP; Rx; bsh; hbn (inferredBy_MotifSimilarity).Traf4; unc-4 (inferredBy_MotifSimilarity_n_Orthology).	8	549	CG10827;CG4467;Gbeta76C;inaC;Jon99Ciii;ninaC;Octbeta2R;trpl
geneListName	jaspar__MA0603.1	3.42	0.0453	cyc (inferredBy_Orthology).	tai; tgo (inferredBy_MotifSimilarity).Mitf; cnc (inferredBy_MotifSimilarity_n_Orthology).	13	832	CG10433;CG10827;CG3332;CG3739;CG4467;CG8468;Cpn;CR31781;daw;Octbeta2R;plh;sosie;yip7
geneListName	cisbp__M5632	3.42	0.0453	bigmax (inferredBy_Orthology).	SREBP (inferredBy_MotifSimilarity).Mitf; Mondo; Usf; tgo (inferredBy_MotifSimilarity_n_Orthology).	15	1288	CG10433;CG10827;CG31343;CG3332;CG4467;CG8468;CG9896;Cpn;CR31781;Jon99Ciii;ninaC;Octbeta2R;plh;sosie;yip7
geneListName	jaspar__MA0312.1	3.40	0.0451			21	1811	CG10827;CG13428;CG16758;CG3699;CG3739;CG42235;CG4467;CG9449;CG9451;CG9896;Cpn;Jon65Aiii;lcs;Npc2d;Octbeta2R;plh;Root;smp-30;sug;trpl;Zip89B
geneListName	transfac_pro__M07814	3.40	0.0451	Optix (directAnnotation).	Awh; CG11294; CG32532; CG34367; CG9876; Drgx; OdsH; al; bsh; ems; hbn; ind; ro; unc-4 (inferredBy_MotifSimilarity).PHDP; Rx; Traf4 (inferredBy_MotifSimilarity_n_Orthology).	23	2220	CG10184;CG10827;CG3106;CG4213;CG42235;CG4467;CG4562;CG8249;dati;Gbeta76C;inaC;Irk3;Jon65Aiv;Jon99Ciii;Mal-A7;ninaC;Npc2d;Obp44a;Octbeta2R;plh;Rh4;trpl;yip7
geneListName	elemento__CCTTATC	3.39	0.0450			51	3824	Ahcy;AkhR;cDIP;CG10184;CG10433;CG10472;CG10621;CG10827;CG11911;CG15255;CG15534;CG15553;CG16758;CG3106;CG31343;CG34040;CG34330;CG3609;CG3699;CG3739;CG3868;CG42249;CG42821;CG4467;CG6283;CG7881;CG8249;CG8468;CG9449;CG9451;Cpn;CR31781;dati;daw;GstD8;Hex-C;inaC;Jon65Aiii;Jon65Aiv;Jon99Cii;lambdaTry;Mal-A1;Mal-A2;Mal-A4;NAAT1;Octbeta2R;plh;Root;sosie;sug;Zip89B
geneListName	transfac_pro__M06074	3.38	0.0449			5	205	CG16727;CG18268;NAAT1;Octbeta2R;Sodh-1
geneListName	scertf__badis.YER184C	3.38	0.0449			10	593	CG42235;CG4467;CG9449;CG9451;Cpn;dati;lambdaTry;Npc2d;sug;trpl
geneListName	predrem__nrMotif935	3.37	0.0449			6	400	CG6283;Cyp4s3;Octbeta2R;Root;sosie;sug
geneListName	taipale_tf_pairs__TEAD4_HES7_RCATTCCNNNNNCRCGYGYN_CAP_repr	3.37	0.0448	sd (inferredBy_Orthology).		10	740	AkhR;CG11911;CG13618;CG15553;CG7881;CG9896;Octbeta2R;Rh4;Sodh-1;sug
geneListName	transfac_public__M00128	3.37	0.0448	grn (inferredBy_Orthology).	pnr (inferredBy_MotifSimilarity_n_Orthology).	63	4960	Ahcy;AkhR;cDIP;CG10184;CG10433;CG10472;CG10516;CG10621;CG11911;CG12766;CG14292;CG15255;CG15534;CG15553;CG16727;CG16758;CG17633;CG31343;CG3332;CG3344;CG33511;CG34040;CG34330;CG3609;CG3699;CG3739;CG3868;CG42235;CG42249;CG4467;CG4562;CG6283;CG8468;CG9449;CG9896;CR31781;Cyp4s3;dati;daw;Eip71CD;GNBP-like3;Gs1;Hex-C;Jon65Aii;Jon65Aiii;Jon65Aiv;Jon99Cii;Mal-A1;Mal-A2;Mal-A4;Nmdmc;Npc2d;Octbeta2R;plh;Rh4…
geneListName	cisbp__M5929	3.37	0.0448	gem (inferredBy_Orthology).		9	654	cDIP;CG10472;CG17032;CG3868;CG4467;CG9090;dati;Octbeta2R;sug
geneListName	transfac_pro__M07778	3.37	0.0448	CG32532 (directAnnotation).	CG11294; CG34367; CG9876; Drgx; OdsH; Optix; PHDP; Rx; al; bsh (inferredBy_MotifSimilarity).unc-4 (inferredBy_MotifSimilarity_n_Orthology).	5	208	CG4467;Gbeta76C;ninaC;Octbeta2R;trpl
geneListName	hocomoco__BMAL1_HUMAN.H10MO.C	3.37	0.0448	cyc (inferredBy_Orthology).	Mitf; SREBP; Usf (inferredBy_MotifSimilarity_n_Orthology).	14	1012	CG10433;CG10827;CG16758;CG31343;CG3332;CG4467;CG8468;CR31781;dati;daw;Octbeta2R;Root;sosie;trpl
geneListName	cisbp__M6255	3.37	0.0448	grn (inferredBy_Orthology).	pnr (inferredBy_MotifSimilarity_n_Orthology).	65	4772	Ahcy;AkhR;cDIP;CG10472;CG10516;CG10621;CG10827;CG11911;CG13618;CG14292;CG15255;CG15534;CG15553;CG16727;CG16758;CG17633;CG3106;CG31343;CG3332;CG3344;CG33511;CG34040;CG34330;CG3609;CG3699;CG3739;CG3868;CG42235;CG4467;CG4562;CG6283;CG8468;CG9449;CG9896;Cpn;Cyp4s3;daw;Eip71CD;Gbeta76C;GNBP-like3;GstD8;Hex-C;Hsc70-1;Irk3;Jon65Aiii;Jon65Aiv;Jon99Cii;Jon99Ciii;lambdaTry;Mal-A1;Mal-A2;Mal-A4;Mal-A7;Nmdmc…
geneListName	taipale__Mlx_DBD_ATCACGTGAT	3.36	0.0448	bigmax (inferredBy_Orthology).	SREBP (inferredBy_MotifSimilarity).Mitf; Mondo; Usf; tgo (inferredBy_MotifSimilarity_n_Orthology).	16	1240	CG10433;CG10827;CG15553;CG31343;CG3332;CG4467;CG8468;CG9896;Cpn;CR31781;Jon99Ciii;ninaC;Octbeta2R;plh;sosie;yip7
geneListName	cisbp__M0801	3.36	0.0448	GATAd; GATAe; grn; pnr; srp (inferredBy_Orthology).		44	2731	Ahcy;AkhR;cDIP;CG10433;CG10472;CG10516;CG10621;CG10827;CG11594;CG13618;CG15255;CG16758;CG17633;CG3106;CG31343;CG34040;CG34330;CG3609;CG3699;CG4562;CG6283;CG8249;CG8468;CG9896;daw;GstD8;Hex-C;Jon65Aiii;Jon65Aiv;Jon99Cii;Mal-A1;Mal-A2;Mal-A4;NAAT1;Nmdmc;plh;Rh4;Root;smp-30;sug;thetaTry;tobi;trpl;Zip89B
geneListName	cisbp__M0220	3.35	0.0447	cyc (inferredBy_Orthology).	tai; tgo (inferredBy_MotifSimilarity).Mitf; cnc (inferredBy_MotifSimilarity_n_Orthology).	13	832	CG10433;CG10827;CG3332;CG3739;CG4467;CG8468;Cpn;CR31781;daw;Octbeta2R;plh;sosie;yip7
geneListName	transfac_pro__M07731	3.35	0.0447	pnr (directAnnotation).	CG10348; grn; ham (inferredBy_MotifSimilarity_n_Orthology).	59	4692	cDIP;CG10433;CG10472;CG10516;CG10827;CG11425;CG11594;CG15255;CG15553;CG16727;CG16758;CG17633;CG18268;CG3106;CG31343;CG3332;CG3344;CG33511;CG34040;CG34330;CG3609;CG3699;CG3868;CG4213;CG42235;CG4467;CG4562;CG6283;CG8249;CG8468;CG9449;CG9451;CG9896;Cpn;Cyp309a1;Cyp4s3;dati;daw;GstD5;Hex-C;inaC;Jon65Aiii;Jon65Aiv;Jon99Cii;Jon99Ciii;Mal-A1;Mal-A2;Mal-A4;Mal-A7;NAAT1;Npc2d;Octbeta2R;plh;smp-30;sosie;su…
geneListName	hocomoco__HIF1A_HUMAN.H10MO.A	3.35	0.0447	sima (inferredBy_Orthology).	tgo (inferredBy_MotifSimilarity_n_Orthology).	24	2553	AkhR;CG10433;CG10472;CG15553;CG16758;CG3332;CG3739;CG42235;CG4467;CG4562;CG9896;Cpn;CR31781;dati;daw;ninaC;Nmdmc;Octbeta2R;plh;Rh4;sosie;sug;trpl;yip7
geneListName	predrem__nrMotif791	3.34	0.0446			11	832	AkhR;CG12224;CG3609;CG4467;CR31781;dati;NAAT1;ninaC;Octbeta2R;sug;trpl
geneListName	cisbp__M5633	3.34	0.0446	Mondo (inferredBy_Orthology).	SREBP; bigmax (inferredBy_MotifSimilarity).Mitf; Usf; tgo (inferredBy_MotifSimilarity_n_Orthology).	18	1290	CG10433;CG10827;CG15553;CG31343;CG3332;CG3739;CG4467;CG8468;CG9896;Cpn;CR31781;daw;Jon99Ciii;ninaC;Octbeta2R;plh;sosie;yip7
geneListName	taipale_tf_pairs__E2F1_EOMES_NGGTGTGNNNGGCGCSNNNCRC_CAP_repr	3.34	0.0446	E2f1 (inferredBy_Orthology).		7	455	CG10184;CG34330;CG4467;inaC;Octbeta2R;plh;trpl
geneListName	flyfactorsurvey__CG10267-F1-3_SOLEXA_5	3.34	0.0446	Zif (directAnnotation).		10	740	CG10184;CG14292;CG4467;Cpn;dati;Mal-A7;NAAT1;Octbeta2R;plh;Sodh-1
geneListName	transfac_pro__M06931	3.34	0.0445	Dad (inferredBy_Orthology).		6	400	CG14292;CG42235;CR31781;Jon65Aiii;Obp44a;Octbeta2R
geneListName	hocomoco__GATA6_HUMAN.H10MO.B	3.34	0.0445	pnr (inferredBy_Orthology).	CG10348; GATAd; GATAe; grn; ham; srp (inferredBy_MotifSimilarity_n_Orthology).	60	4523	Ahcy;AkhR;cDIP;CG10433;CG10472;CG10516;CG10621;CG10827;CG11594;CG11911;CG12766;CG14292;CG15255;CG15553;CG16727;CG16758;CG17633;CG18268;CG3106;CG31343;CG3332;CG33511;CG34040;CG34330;CG3609;CG3699;CG42821;CG4467;CG4562;CG6283;CG8468;CG9510;CG9682;CG9896;Cpn;CR31781;Cyp4s3;dati;daw;Gbeta76C;GstD8;Hex-C;Jon65Aiii;Jon65Aiv;Jon99Cii;Jon99Ciii;Mal-A2;Mal-A4;Nmdmc;Npc2d;Octbeta2R;plh;Rh4;Root;smp-30;sug;…
geneListName	cisbp__M0711	3.33	0.0445		Eip74EF; Ets21C; Ets65A; Ets96B; aop; pnt (inferredBy_MotifSimilarity).Atac3; Ets97D (inferredBy_MotifSimilarity_n_Orthology).	7	425	CG4467;Cpn;lambdaTry;Octbeta2R;plh;Sodh-1;trpl
geneListName	cisbp__M0713	3.33	0.0445	Ets21C (directAnnotation).	Eip74EF; Ets65A; Ets96B; Ets97D; aop; pnt (inferredBy_MotifSimilarity).Atac3 (inferredBy_MotifSimilarity_n_Orthology).	7	466	CG4467;Cpn;lambdaTry;Octbeta2R;plh;Sodh-1;trpl
geneListName	transfac_public__M00278	3.33	0.0444	grn (inferredBy_Orthology).		62	4989	Ahcy;AkhR;cDIP;CG10433;CG10472;CG10621;CG10827;CG11594;CG11911;CG12766;CG13618;CG14292;CG15255;CG15534;CG15553;CG16758;CG17633;CG3106;CG31343;CG3344;CG33511;CG34040;CG34330;CG3609;CG3699;CG3739;CG3868;CG42249;CG4467;CG4562;CG6283;CG8249;CG8468;CG9090;CG9449;CG9896;CR31781;Cyp4s3;dati;daw;GNBP-like3;inaC;Jon65Aiii;Jon65Aiv;Jon99Cii;lambdaTry;Mal-A1;Mal-A2;Mal-A4;Npc2d;Octbeta2R;plh;Rh4;smp-30;Sodh…
geneListName	cisbp__M4595	3.32	0.0444	grn (inferredBy_Orthology).	HLH3B; pnr (inferredBy_MotifSimilarity_n_Orthology).	60	4346	Ahcy;AkhR;cDIP;CG10433;CG10472;CG10516;CG10621;CG11594;CG14292;CG15255;CG15553;CG16727;CG16758;CG17192;CG17633;CG3106;CG31343;CG3332;CG33511;CG34040;CG3609;CG3699;CG3739;CG3868;CG4467;CG4562;CG6283;CG6870;CG8468;CG9510;CG9682;CG9896;Cyp309a1;Cyp309a2;Cyp4s3;daw;Eip71CD;GNBP-like3;GstD8;Hex-C;Irk3;Jon65Aiii;Jon65Aiv;Jon99Cii;Jon99Ciii;Mal-A2;Mal-A4;Mal-A7;Nmdmc;Npc2d;Octbeta2R;plh;Rh4;Root;smp-30;…
geneListName	cisbp__M6275	3.31	0.0443	sima (inferredBy_Orthology).	tgo (inferredBy_MotifSimilarity_n_Orthology).	23	2446	AkhR;CG10433;CG10472;CG15553;CG16758;CG3332;CG3739;CG42235;CG4467;CG4562;CG9896;CR31781;dati;daw;ninaC;Nmdmc;Octbeta2R;plh;Rh4;sosie;sug;trpl;yip7
geneListName	hocomoco__GATA3_MOUSE.H10MO.C	3.31	0.0442	grn (inferredBy_Orthology).	CycT; pnr (inferredBy_MotifSimilarity_n_Orthology).	67	4989	Ahcy;AkhR;cDIP;CG10472;CG10516;CG10621;CG10827;CG11911;CG13618;CG14292;CG15255;CG15534;CG15553;CG16727;CG16758;CG17633;CG3106;CG31343;CG3332;CG3344;CG33511;CG34040;CG34330;CG3609;CG3699;CG3739;CG3868;CG42235;CG4467;CG4562;CG6283;CG8468;CG9449;CG9896;Cpn;Cyp4s3;dati;daw;Eip71CD;Gbeta76C;GNBP-like3;GstD8;Hex-C;Hsc70-1;Irk3;Jon65Aiii;Jon65Aiv;Jon99Cii;Jon99Ciii;lambdaTry;Mal-A1;Mal-A2;Mal-A4;Mal-A7;…
geneListName	cisbp__M4622	3.29	0.0441	grn (inferredBy_Orthology).	CycT; GATAd; GATAe; HLH3B; pnr; srp (inferredBy_MotifSimilarity_n_Orthology).	63	4840	Ahcy;AkhR;cDIP;CG10433;CG10472;CG10516;CG10621;CG11594;CG13618;CG14292;CG15255;CG15553;CG16727;CG16758;CG17633;CG3106;CG31343;CG3332;CG3344;CG33511;CG34040;CG3609;CG3699;CG3739;CG3868;CG42821;CG4467;CG4562;CG6283;CG6870;CG8468;CG9510;CG9682;CG9896;CR31781;Cyp309a1;Cyp309a2;Cyp4s3;daw;Eip71CD;GNBP-like3;GstD8;Hex-C;Jon65Aiii;Jon65Aiv;Jon99Cii;Jon99Ciii;Mal-A2;Mal-A4;Mal-A7;Nmdmc;Npc2d;Octbeta2R;pl…
geneListName	cisbp__M5309	3.29	0.0441		Mitf; SREBP; cwo; cyc; tgo (inferredBy_MotifSimilarity).Mondo; Usf; bigmax; cnc (inferredBy_MotifSimilarity_n_Orthology).	10	628	CG10433;CG10827;CG3332;CG4467;CG8468;CG9449;Cpn;CR31781;Octbeta2R;plh
geneListName	predrem__nrMotif2253	3.28	0.0440			15	1240	CG10472;CG11911;CG16727;CG16758;CG4467;CG8468;CG9449;CG9451;CG9896;Cpn;Gbeta76C;Mal-A7;ninaC;Octbeta2R;Ptp36E
geneListName	cisbp__M3314	3.27	0.0440	grn (inferredBy_Orthology).	pnr (inferredBy_MotifSimilarity_n_Orthology).	62	4840	Ahcy;AkhR;cDIP;CG10184;CG10433;CG10472;CG10516;CG10621;CG11911;CG14292;CG15255;CG15534;CG15553;CG16727;CG16758;CG17633;CG31343;CG3332;CG3344;CG33511;CG34040;CG34330;CG3609;CG3699;CG3739;CG3868;CG42235;CG42249;CG4467;CG4562;CG6283;CG8468;CG9449;CG9896;CR31781;Cyp4s3;dati;daw;Eip71CD;GNBP-like3;Gs1;Hex-C;Jon65Aii;Jon65Aiii;Jon65Aiv;Jon99Cii;Mal-A1;Mal-A2;Mal-A4;Nmdmc;Npc2d;Octbeta2R;plh;Rh4;Root;sm…
geneListName	bergman__pnr	3.27	0.0439	pnr (directAnnotation).		61	4692	Ahcy;AkhR;Atg4a;cDIP;CG10433;CG10472;CG10516;CG10621;CG10827;CG11594;CG11911;CG15255;CG15534;CG15553;CG16727;CG16758;CG17633;CG3106;CG31343;CG3332;CG34040;CG34330;CG3609;CG3699;CG3739;CG4213;CG4467;CG4562;CG6283;CG8468;CG9449;CG9451;CG9510;CG9682;CG9896;CR31781;Cyp4s3;daw;GstD5;GstD8;Hex-C;Hsc70-1;inaC;Irk3;Jon65Aiii;Jon65Aiv;Jon99Cii;Mal-A1;Mal-A2;Mal-A4;Nmdmc;Npc2d;Obp44a;Octbeta2R;plh;smp-30;s…
geneListName	predrem__nrMotif690	3.26	0.0438			6	323	CG42235;CG9896;Cpn;CR31781;inaC;Mal-A7
geneListName	transfac_pro__M01580	3.26	0.0438		mio (inferredBy_MotifSimilarity_n_Orthology).	7	466	CG10472;CG10827;CG15553;CG4467;Cpn;Octbeta2R;plh
geneListName	cisbp__M6253	3.26	0.0438	grn (inferredBy_Orthology).	CycT; GATAd; GATAe; HLH3B; Sirt6; pnr; srp (inferredBy_MotifSimilarity_n_Orthology).	63	4840	Ahcy;AkhR;cDIP;CG10433;CG10472;CG10516;CG10621;CG11594;CG11911;CG13618;CG14292;CG15255;CG15553;CG16727;CG16758;CG17633;CG3106;CG31343;CG3332;CG3344;CG33511;CG34040;CG3609;CG3699;CG3739;CG3868;CG4467;CG4562;CG6283;CG6870;CG8468;CG9449;CG9510;CG9682;CG9896;CR31781;Cyp309a1;Cyp309a2;Cyp4s3;daw;Eip71CD;GNBP-like3;GstD8;Hex-C;Jon65Aiii;Jon65Aiv;Jon99Cii;Jon99Ciii;Mal-A4;Mal-A7;Nmdmc;Npc2d;Octbeta2R;pl…
geneListName	cisbp__M0792	3.25	0.0437		GATAd; GATAe; grn; pnr; srp (inferredBy_MotifSimilarity_n_Orthology).	20	1766	CG10472;CG10827;CG16758;CG31343;CG34040;CG3699;CG42249;CG4467;CG4562;CG8249;CG8468;daw;Jon65Aiv;lambdaTry;Mal-A4;NAAT1;Octbeta2R;Root;sug;Zip89B
geneListName	homer__KCACGTGMCN_bHLHE40	3.25	0.0437		cyc; tgo (inferredBy_MotifSimilarity).mio (inferredBy_MotifSimilarity_n_Orthology).	20	1766	CG10433;CG10827;CG15553;CG16758;CG31343;CG3332;CG3739;CG4213;CG4467;CG8468;CG9449;Cpn;CR31781;daw;Jon99Ciii;ninaC;Octbeta2R;plh;sosie;yip7
geneListName	cisbp__M5306	3.24	0.0436		E(spl)m5-HLH; cyc; h; tgo (inferredBy_MotifSimilarity).SREBP; Usf (inferredBy_MotifSimilarity_n_Orthology).	14	895	CG10433;CG10827;CG15553;CG3332;CG8468;CG9449;Cpn;CR31781;Jon99Ciii;ninaC;Octbeta2R;plh;sosie;yip7
geneListName	flyfactorsurvey__br_SOLEXA_10_FBgn0000210	3.23	0.0436	br (directAnnotation).		32	2780	AkhR;CG11594;CG11911;CG15255;CG16727;CG18268;CG31343;CG34040;CG34330;CG3868;CG42235;CG4562;CG6283;CG8249;CG8468;CG9896;Cpn;CR31781;Cyp4s3;dati;daw;Hex-C;Hsc70-1;inaC;Jon65Aiv;Mal-A2;Npc2d;Octbeta2R;plh;Rh4;Root;trpl
geneListName	transfac_pro__M07888	3.23	0.0436	Rel (directAnnotation).		6	391	CG3868;Cpn;Jon65Aiii;Mal-A4;Nmdmc;Zip89B
geneListName	cisbp__M3517	3.23	0.0435		grn (inferredBy_MotifSimilarity_n_Orthology).	59	4713	Ahcy;AkhR;cDIP;CG10433;CG10472;CG10621;CG10827;CG11594;CG11911;CG12766;CG13618;CG14292;CG15255;CG15534;CG15553;CG16758;CG17633;CG3106;CG31343;CG3344;CG33511;CG34040;CG34330;CG3609;CG3699;CG3739;CG3868;CG42249;CG4467;CG4562;CG6283;CG8468;CG9090;CG9896;CR31781;Cyp4s3;dati;daw;GNBP-like3;inaC;Jon65Aiii;Jon65Aiv;Jon99Cii;lambdaTry;Mal-A1;Mal-A2;Mal-A4;Npc2d;Octbeta2R;plh;Rh4;smp-30;Sodh-1;sosie;sug;t…
geneListName	taipale__MLXIPL_full_ATCACGTGAT	3.22	0.0435	Mondo (inferredBy_Orthology).	SREBP; bigmax (inferredBy_MotifSimilarity).Mitf; Usf; tgo (inferredBy_MotifSimilarity_n_Orthology).	18	1288	CG10433;CG10827;CG15553;CG31343;CG3332;CG3739;CG4467;CG8468;CG9896;Cpn;CR31781;daw;Jon99Ciii;ninaC;Octbeta2R;plh;sosie;yip7
geneListName	predrem__nrMotif2006	3.22	0.0434		bin (inferredBy_MotifSimilarity_n_Orthology).	4	196	CG10184;CG9449;CR31781;plh
geneListName	cisbp__M5668	3.21	0.0434	Rel (inferredBy_Orthology).	Dif (inferredBy_MotifSimilarity).dl (inferredBy_MotifSimilarity_n_Orthology).	7	469	CG17032;CG4562;Cpn;Jon65Aiii;Mal-A4;Nmdmc;Zip89B
geneListName	neph__UW.Motif.0313	3.21	0.0434			8	593	CG42235;CG4467;CG6870;Cpn;dati;Octbeta2R;plh;Root
geneListName	predrem__nrMotif55	3.21	0.0433			5	283	CG3739;CG4562;Cyp4s3;Octbeta2R;smp-30
geneListName	hocomoco__ARX_HUMAN.H10MO.D	3.20	0.0433		Awh; CG11294; CG34367; CG9876; Drgx; E5; Lim3; OdsH; Optix; Pph13; Rx; Vsx2; al; bsh; ems; en; hbn; otp; ro; unc-4; unpg (inferredBy_MotifSimilarity).CG32532; PHDP; Traf4 (inferredBy_MotifSimilarity_n_Orthology).	4	100	Gbeta76C;inaC;ninaC;trpl
geneListName	transfac_pro__M07813	3.20	0.0433	OdsH (directAnnotation).	CG11294; CG32532; CG34367; CG9876; Drgx; Optix; al; bsh; hbn; unc-4 (inferredBy_MotifSimilarity).PHDP; Traf4 (inferredBy_MotifSimilarity_n_Orthology).	5	253	Gbeta76C;inaC;ninaC;Octbeta2R;trpl
geneListName	hocomoco__DRGX_HUMAN.H10MO.D	3.20	0.0433	Drgx (inferredBy_Orthology).	CG11294; CG32532; CG34367; CG9876; OdsH; Optix; al; bsh; hbn; unc-4 (inferredBy_MotifSimilarity).PHDP; Rx; Traf4; eve (inferredBy_MotifSimilarity_n_Orthology).	16	1437	CG10827;CG4213;CG42235;CG4467;Gbeta76C;inaC;Irk3;Jon65Aiv;Jon99Ciii;ninaC;Npc2d;Octbeta2R;plh;Rh4;trpl;yip7
geneListName	stark__YGATAAGC	3.20	0.0433	pnr (directAnnotation).		59	4960	AkhR;cDIP;CG10184;CG10433;CG10472;CG10516;CG10621;CG10827;CG11594;CG12766;CG13618;CG14292;CG15255;CG15534;CG15553;CG16727;CG16758;CG17633;CG31343;CG32444;CG34040;CG34330;CG3609;CG3699;CG4213;CG4467;CG4562;CG6283;CG6870;CG7881;CG8249;CG8468;CG9449;CG9451;CG9510;CG9896;Cpn;CR31781;Cyp4s3;dati;daw;Hex-C;Hsc70-1;inaC;Jon65Aiii;Jon65Aiv;Mal-A1;Mal-A2;Mal-A4;Nmdmc;Npc2d;Octbeta2R;plh;smp-30;sug;thetaTr…
geneListName	cisbp__M0875	3.20	0.0432			34	3714	AkhR;Atg4a;cDIP;CG15534;CG16727;CG16758;CG34330;CG4467;CG6870;CG8468;CG9449;CG9451;CG9896;Cyp4s3;dati;Gs1;Hsc70-1;Irk3;Jon65Aiii;LManIII;NAAT1;Nmdmc;Npc2d;Obp44a;Octbeta2R;plh;Ptp36E;Rh4;Root;Sodh-1;sosie;sug;trpl;Tsf1
geneListName	cisbp__M6342	3.19	0.0431	Mef2 (inferredBy_Orthology).	rump (inferredBy_MotifSimilarity_n_Orthology).	8	535	CG10184;CG3344;CG4467;inaC;NAAT1;plh;Ptp36E;sug
geneListName	cisbp__M6141	3.18	0.0431		CG11294; CG32532; CG34367; CG9876; Drgx; OdsH; Optix; al; bsh (inferredBy_MotifSimilarity).PHDP; Traf4; unc-4 (inferredBy_MotifSimilarity_n_Orthology).	6	408	CG4467;Gbeta76C;inaC;ninaC;Octbeta2R;trpl
geneListName	transfac_pro__M01294	3.18	0.0430		CG11294; CG34367; CG9876; OdsH; Optix; bsh; hbn; unc-4 (inferredBy_MotifSimilarity).CG32532; Drgx; PHDP; Traf4 (inferredBy_MotifSimilarity_n_Orthology).	5	249	Gbeta76C;inaC;ninaC;Octbeta2R;trpl
geneListName	transfac_pro__M07884	3.17	0.0430	Dif (directAnnotation).	dl (inferredBy_MotifSimilarity).Rel (inferredBy_MotifSimilarity_n_Orthology).	12	832	CG11911;CG34040;CG4562;daw;GNBP-like3;Jon65Aiii;Mal-A4;Nmdmc;sosie;sug;yip7;Zip89B
geneListName	hocomoco__GATA1_HUMAN.H10MO.S	3.17	0.0430	grn (inferredBy_Orthology).	CycT; GATAd; GATAe; HLH3B; Sirt6; pnr; srp (inferredBy_MotifSimilarity_n_Orthology).	53	3736	Ahcy;AkhR;cDIP;CG10433;CG10472;CG10516;CG10621;CG11594;CG13618;CG14292;CG15553;CG16727;CG16758;CG17633;CG3106;CG31343;CG3332;CG33511;CG34040;CG3609;CG3699;CG3739;CG3868;CG4467;CG4562;CG6283;CG8468;CG9510;CR31781;Cyp4s3;daw;GNBP-like3;GstD8;Hex-C;Jon65Aiii;Jon65Aiv;Jon99Cii;Jon99Ciii;Mal-A4;Mal-A7;Nmdmc;Npc2d;Octbeta2R;plh;Rh4;Root;smp-30;sosie;sug;tobi;Tsf1;yip7;Zip89B
geneListName	transfac_pro__M01908	3.17	0.0430			35	3827	CG10184;CG13618;CG16727;CG16758;CG18268;CG3609;CG3739;CG4213;CG42235;CG4467;CG7881;CG8468;CG9449;CG9451;Cpn;dati;daw;GNBP-like3;Hex-C;Hsc70-1;Jon65Aii;Jon65Aiii;Jon99Cii;lambdaTry;NAAT1;Nmdmc;Npc2d;Octbeta2R;plh;Ptp36E;Sodh-1;sug;trpl;Tsf1;Zip89B
geneListName	yetfasco__YBL103C_870	3.16	0.0429		mio (inferredBy_MotifSimilarity_n_Orthology).	4	162	CG15553;Cpn;Octbeta2R;plh
geneListName	homer__GCTGATAASV_Unknown5	3.16	0.0429			58	4654	AkhR;Atg4a;cDIP;CG10433;CG10516;CG10621;CG10827;CG11594;CG12766;CG15255;CG15534;CG15553;CG16727;CG16758;CG17633;CG31343;CG33511;CG34040;CG34330;CG3609;CG3699;CG4213;CG42235;CG4562;CG6283;CG6870;CG8249;CG8468;CG9449;CG9451;CG9510;CG9896;daw;Eip71CD;GstD8;Hex-C;Jon65Aiii;Jon65Aiv;Jon99Cii;Mal-A1;Mal-A2;Mal-A4;Nmdmc;Npc2d;Obp99a;Octbeta2R;plh;Rh4;Root;smp-30;Sodh-1;sosie;sug;thetaTry;tobi;trpl;Tsf1;…
geneListName	transfac_pro__M01619	3.16	0.0429	GATAd; GATAe; grn; pnr; srp (inferredBy_Orthology).		56	4654	Ahcy;AkhR;cDIP;CG10184;CG10433;CG10472;CG10516;CG10621;CG10827;CG13618;CG15255;CG15534;CG15553;CG16727;CG16758;CG17633;CG3106;CG31343;CG3332;CG33511;CG34040;CG34330;CG3609;CG3699;CG42249;CG4467;CG4562;CG6283;CG8249;CG8468;CG9449;CG9451;CG9682;CG9896;daw;GstE3;Hex-C;inaC;Jon65Aiii;Jon65Aiv;Jon99Cii;Jon99Ciii;Mal-A1;Mal-A2;Mal-A4;NAAT1;Nmdmc;Octbeta2R;plh;Rh4;Root;sug;thetaTry;tobi;trpl;Zip89B
geneListName	jaspar__MA0275.1	3.16	0.0429			33	3537	CG10184;CG13618;CG16727;CG16758;CG18268;CG3609;CG3739;CG42235;CG4467;CG7881;CG8468;CG9449;CG9451;Cpn;dati;daw;GNBP-like3;Hex-C;Hsc70-1;Jon65Aii;Jon65Aiii;Jon99Cii;lambdaTry;Nmdmc;Npc2d;Octbeta2R;plh;Ptp36E;Sodh-1;sug;trpl;Tsf1;Zip89B
geneListName	jaspar__MA0289.1	3.15	0.0428	GATAd; GATAe; grn; pnr; srp (inferredBy_Orthology).		56	4654	Ahcy;AkhR;cDIP;CG10184;CG10433;CG10472;CG10516;CG10621;CG10827;CG13618;CG15255;CG15534;CG15553;CG16727;CG16758;CG17633;CG3106;CG31343;CG3332;CG33511;CG34040;CG34330;CG3609;CG3699;CG42249;CG4467;CG4562;CG6283;CG8249;CG8468;CG9449;CG9451;CG9682;CG9896;daw;GstE3;Hex-C;inaC;Jon65Aiii;Jon65Aiv;Jon99Cii;Jon99Ciii;Mal-A1;Mal-A2;Mal-A4;NAAT1;Nmdmc;Octbeta2R;plh;Rh4;Root;sug;thetaTry;tobi;trpl;Zip89B
geneListName	cisbp__M2343	3.15	0.0428		CrebA (inferredBy_MotifSimilarity_n_Orthology).	6	309	CG3739;CG4467;CR31781;Octbeta2R;sosie;trpl
geneListName	taipale__TFCP2_full_NCCGGNNNNNNCCGGN_repr	3.14	0.0427	gem (inferredBy_Orthology).		7	512	cDIP;CG10472;CG3868;CG9090;dati;Octbeta2R;sug
geneListName	jaspar__MA0376.1	3.14	0.0427		mio (inferredBy_MotifSimilarity_n_Orthology).	4	158	CG15553;Cpn;Octbeta2R;plh
geneListName	cisbp__M3295	3.14	0.0427	croc (inferredBy_Orthology).		5	240	CG34040;Octbeta2R;plh;smp-30;trpl
geneListName	jaspar__MA0550.1	3.13	0.0427		CrebA (inferredBy_MotifSimilarity_n_Orthology).	6	308	CG3739;CG4467;CR31781;Octbeta2R;sosie;trpl
geneListName	transfac_pro__M07725	3.13	0.0427	GATAe (directAnnotation).		60	4934	Ahcy;AkhR;Atg4a;cDIP;CG10184;CG10433;CG10472;CG10516;CG10621;CG10827;CG11594;CG13618;CG14292;CG15255;CG15534;CG15553;CG16758;CG17633;CG3106;CG31343;CG3332;CG3344;CG33511;CG34040;CG34330;CG3609;CG3699;CG3739;CG42249;CG4467;CG4562;CG8468;CG9682;CG9896;dati;daw;Eip71CD;GNBP-like3;Hex-C;inaC;Jon65Aiii;Jon65Aiv;Jon99Cii;Jon99Ciii;Mal-A1;Mal-A2;Mal-A4;Mal-A7;Nmdmc;Octbeta2R;plh;Rh4;Root;smp-30;Sodh-1;s…
geneListName	stark__AATTWWNAYGCR	3.13	0.0426			6	391	Cpn;CR31781;Irk3;Npc2d;Octbeta2R;plh
geneListName	cisbp__M4232	3.13	0.0426			4	145	Atg4a;CG4467;Cyp4s3;NAAT1
geneListName	transfac_pro__M06989	3.12	0.0426			9	654	Atg4a;CG10433;CG9451;Cpn;LManIII;Octbeta2R;Ptp36E;sug;trpl
geneListName	transfac_pro__M05452	3.12	0.0425	CG13296 (inferredBy_Orthology).		43	4692	AkhR;cDIP;CG10621;CG15255;CG15534;CG15553;CG16758;CG17032;CG18268;CG31343;CG3332;CG3699;CG3868;CG4213;CG42235;CG7881;CG8249;CG9451;CG9896;CR31781;Cyp309a1;dati;daw;Gbeta76C;Hsc70-1;inaC;Irk3;Jon65Aiii;Jon99Ciii;LManIII;Mal-A7;NAAT1;Nmdmc;Npc2d;Octbeta2R;plh;Ptp36E;Sodh-1;sosie;trpl;Tsf1;yip7;Zip89B
geneListName	cisbp__M4310	3.12	0.0425			33	3670	CG10184;CG13618;CG16727;CG16758;CG18268;CG3609;CG3739;CG42235;CG4467;CG7881;CG8468;CG9449;CG9451;Cpn;dati;daw;GNBP-like3;Hex-C;Hsc70-1;Jon65Aii;Jon65Aiii;Jon99Cii;lambdaTry;Nmdmc;Npc2d;Octbeta2R;plh;Ptp36E;Sodh-1;sug;trpl;Tsf1;Zip89B
geneListName	cisbp__M2181	3.12	0.0425	mio (inferredBy_Orthology).		4	162	CG15553;Cpn;Octbeta2R;plh
geneListName	homer__RGGGTAWWWTHGTAA_Unknown1	3.12	0.0425			6	295	CG4467;CG9896;dati;Octbeta2R;Rh4;trpl
geneListName	swissregulon__sacCer__YER184C	3.12	0.0425			13	952	CG42235;CG4467;CG9449;CG9451;Cpn;Cyp4s3;dati;lambdaTry;Npc2d;Octbeta2R;sosie;sug;trpl
geneListName	taipale_tf_pairs__ETV2_SOX15_RSCGGAANNNNNNYWTTGT_CAP_repr	3.12	0.0425			8	654	CG3332;CG42235;CG4467;CG9449;inaC;lambdaTry;Sodh-1;sosie
geneListName	yetfasco__YDR081C_1050	3.11	0.0425			4	145	Atg4a;CG4467;Cyp4s3;NAAT1
geneListName	cisbp__M5238	3.11	0.0424		tai; tgo (inferredBy_MotifSimilarity).cyc (inferredBy_MotifSimilarity_n_Orthology).	8	607	CG10433;CG3332;CG4467;CG8468;Octbeta2R;plh;sosie;yip7
geneListName	cisbp__M4465	3.11	0.0424	Max (inferredBy_Orthology).	Mitf; Myc; Usf; cnc; tgo (inferredBy_MotifSimilarity_n_Orthology).	6	339	CG3332;CG4467;CR31781;Octbeta2R;plh;sosie
geneListName	jaspar__MA0916.1	3.11	0.0424	Ets21C (directAnnotation).	Eip74EF; Ets65A; Ets96B; Ets97D; aop; pnt (inferredBy_MotifSimilarity).Atac3 (inferredBy_MotifSimilarity_n_Orthology).	6	307	CG4467;Cpn;lambdaTry;plh;Sodh-1;trpl
geneListName	hocomoco__GATA1_HUMAN.H10MO.A	3.10	0.0424	grn (inferredBy_Orthology).	CycT; HLH3B; pnr (inferredBy_MotifSimilarity_n_Orthology).	60	4840	Ahcy;AkhR;cDIP;CG10433;CG10472;CG10516;CG10621;CG11594;CG13618;CG14292;CG15255;CG16727;CG16758;CG17633;CG31343;CG34330;CG3609;CG3699;CG3739;CG4213;CG42235;CG4467;CG4562;CG6283;CG6870;CG7025;CG8249;CG8468;CG9510;CG9896;Cyp4s3;dati;daw;Eip71CD;Gbeta76C;GNBP-like3;GstD8;Hex-C;inaC;Jon65Aiii;Jon65Aiv;Jon99Cii;Jon99Ciii;Mal-A1;Mal-A2;Mal-A4;Mal-A7;Nmdmc;Npc2d;Octbeta2R;plh;Rh4;Root;smp-30;sosie;sug;to…
geneListName	hdpi__POU3F2	3.10	0.0424	vvl (inferredBy_Orthology).		7	512	CG14292;CG15553;CG3332;Cpn;Jon65Aiv;Npc2d;Octbeta2R
geneListName	transfac_pro__M06594	3.10	0.0424	CG15710; CG3847 (inferredBy_Orthology).		6	402	CG11594;plh;Rh4;Root;Tsf1;Zip89B
geneListName	transfac_public__M00291	3.10	0.0424	croc (inferredBy_Orthology).		5	247	CG34040;CG34330;Octbeta2R;plh;trpl
geneListName	factorbook__USF	3.10	0.0423	Usf (inferredBy_Orthology).	cwo; cyc (inferredBy_MotifSimilarity).Max; Mitf; Myc; SREBP; cnc; tgo (inferredBy_MotifSimilarity_n_Orthology).	6	408	CG10433;CG3332;CG4467;CR31781;Octbeta2R;Ptp36E
geneListName	cisbp__M4775	3.10	0.0423		br (inferredBy_MotifSimilarity).	34	2902	AkhR;CG11594;CG11911;CG15255;CG16727;CG18268;CG31343;CG34040;CG34330;CG3868;CG42235;CG4562;CG6283;CG8249;CG8468;CG9896;Cpn;CR31781;Cyp4s3;dati;daw;Gs1;Hex-C;Hsc70-1;inaC;Jon65Aiv;Mal-A2;Npc2d;Octbeta2R;plh;Rh4;Root;smp-30;trpl
geneListName	transfac_pro__M07825	3.10	0.0423	Rx (directAnnotation).	CG32532; PHDP; al (inferredBy_MotifSimilarity).unc-4 (inferredBy_MotifSimilarity_n_Orthology).	5	257	Gbeta76C;Jon99Ciii;ninaC;Octbeta2R;trpl
geneListName	cisbp__M5930	3.10	0.0423	Mitf (inferredBy_Orthology).	SREBP; Usf; bigmax; cwo; cyc; tgo (inferredBy_MotifSimilarity).Mondo; cnc (inferredBy_MotifSimilarity_n_Orthology).	13	1182	CG10433;CG10827;CG31343;CG3332;CG4467;CG8468;Cpn;CR31781;daw;Octbeta2R;plh;sosie;yip7
geneListName	cisbp__M4320	3.09	0.0423	GATAd; GATAe; grn; pnr; srp (inferredBy_Orthology).		54	3501	Ahcy;AkhR;cDIP;CG10184;CG10433;CG10472;CG10516;CG10621;CG10827;CG13618;CG15255;CG15534;CG17192;CG17633;CG3106;CG31343;CG3332;CG33511;CG34040;CG34330;CG3609;CG3699;CG3739;CG4213;CG42235;CG4562;CG6283;CG8249;CG8468;CG9510;CG9682;CG9896;daw;GstD8;Hex-C;inaC;Jon65Aiii;Jon65Aiv;Jon99Cii;Jon99Ciii;Mal-A1;Mal-A2;Mal-A4;Nmdmc;Octbeta2R;plh;Rh4;Root;smp-30;sug;tobi;trpl;yip7;Zip89B
geneListName	cisbp__M4600	3.09	0.0422	grn (inferredBy_Orthology).	CycT; HLH3B; pnr (inferredBy_MotifSimilarity_n_Orthology).	68	4740	Ahcy;AkhR;cDIP;CG10433;CG10472;CG10516;CG10621;CG11594;CG11911;CG12766;CG13618;CG14292;CG15255;CG15534;CG15553;CG16727;CG16758;CG17633;CG3106;CG31343;CG3332;CG3344;CG33511;CG34040;CG34330;CG3609;CG3699;CG3868;CG42235;CG4467;CG4562;CG6283;CG6870;CG8249;CG8468;CG9449;CG9510;CG9682;CG9896;CR31781;Cyp4s3;daw;Eip71CD;GNBP-like3;GstD8;Hex-C;Jon65Aiii;Jon65Aiv;Jon99Cii;Jon99Ciii;Mal-A1;Mal-A2;Mal-A4;Mal…
geneListName	flyfactorsurvey__tgo_tai_SANGER_5_FBgn0015014	3.08	0.0422	tgo (directAnnotation).	tai (inferredBy_MotifSimilarity).cyc (inferredBy_MotifSimilarity_n_Orthology).	6	300	CG10433;CG3332;CG4467;CG8468;Octbeta2R;plh
geneListName	taipale__Hic1_DBD_RTGCCMNCN_repr	3.08	0.0421			6	391	dati;Jon65Aiii;Npc2d;Octbeta2R;plh;trpl
geneListName	cisbp__M6023	3.07	0.0421			7	512	dati;Jon65Aiii;Npc2d;Octbeta2R;plh;Root;trpl
geneListName	predrem__nrMotif1720	3.07	0.0420			8	663	CG3332;CG42235;Cpn;CR31781;daw;GstD8;Jon65Aiii;trpl
geneListName	scertf__badis.YLR278C	3.07	0.0420			5	183	CG16758;CG42235;CG9449;CG9451;CG9896
geneListName	taipale__TFE3_DBD_NNCACGTGNN	3.07	0.0420	Mitf (inferredBy_Orthology).	SREBP; Usf; bigmax; cwo; cyc (inferredBy_MotifSimilarity).Mondo; cnc; tgo (inferredBy_MotifSimilarity_n_Orthology).	13	1128	CG10433;CG10827;CG31343;CG3332;CG4467;CG8468;Cpn;CR31781;daw;Octbeta2R;plh;sosie;yip7
geneListName	transfac_pro__M01910	3.06	0.0420	GATAd; GATAe; grn; pnr; srp (inferredBy_Orthology).		62	4508	Ahcy;AkhR;cDIP;CG10184;CG10433;CG10472;CG10516;CG10621;CG10827;CG11594;CG13618;CG15255;CG15534;CG16727;CG16758;CG17192;CG17633;CG3106;CG31343;CG3332;CG33511;CG34040;CG34330;CG3609;CG3699;CG3739;CG4213;CG42249;CG4562;CG6283;CG6870;CG8249;CG8468;CG9510;CG9682;CG9896;daw;Eip71CD;GstD8;Hex-C;inaC;Jon65Aiii;Jon65Aiv;Jon99Cii;Jon99Ciii;Mal-A1;Mal-A2;Mal-A4;NAAT1;Nmdmc;Npc2d;Octbeta2R;plh;Rh4;Root;smp-3…
geneListName	transfac_pro__M01410	3.05	0.0419	ara; caup (inferredBy_Orthology).	mirr (inferredBy_MotifSimilarity_n_Orthology).	6	404	CG14292;CG4213;CG4467;CG8468;NAAT1;plh
geneListName	transfac_pro__M07960	3.05	0.0419	Hnf4 (directAnnotation).	svp (inferredBy_MotifSimilarity_n_Orthology).	12	895	CG13618;CG15553;CG9449;CG9682;Cpn;Cyp309a1;Cyp4s3;dati;daw;Gs1;inaC;Octbeta2R
geneListName	stark__RTATATRTRB	3.04	0.0418	Cf2 (directAnnotation).		6	409	Atg4a;CG4467;CG8468;Cyp4s3;NAAT1;Ptp36E
geneListName	scertf__badis.GZF3	3.04	0.0417	GATAd; GATAe; grn; pnr; srp (inferredBy_Orthology).		51	3256	Ahcy;AkhR;cDIP;CG10472;CG10516;CG10621;CG10827;CG11594;CG13618;CG15255;CG15534;CG16758;CG17192;CG17633;CG3106;CG31343;CG33511;CG34040;CG34330;CG3609;CG3699;CG3739;CG4213;CG42249;CG4562;CG6283;CG8468;CG9682;CG9896;daw;Eip71CD;Hex-C;Jon65Aiii;Jon65Aiv;Jon99Cii;Mal-A1;Mal-A2;Mal-A4;NAAT1;Nmdmc;Octbeta2R;plh;Rh4;Root;smp-30;Sodh-1;sug;thetaTry;tobi;trpl;Zip89B
geneListName	cisbp__M4596	3.03	0.0417	Max (inferredBy_Orthology).	Mitf; Myc; Usf; cnc; tgo (inferredBy_MotifSimilarity_n_Orthology).	19	1967	CG10433;CG10827;CG15553;CG16758;CG31343;CG3332;CG3739;CG4467;CG8468;CG9896;Cpn;CR31781;daw;Octbeta2R;plh;Ptp36E;sosie;trpl;yip7
geneListName	transfac_pro__M06903	3.03	0.0417	CG9609 (inferredBy_Orthology).		5	283	CG13618;CG3332;daw;LManIII;Mal-A7
geneListName	predrem__nrMotif1120	3.03	0.0417			7	513	CG10827;CG14292;CG9449;Cyp4s3;Obp44a;Octbeta2R;sosie
geneListName	flyfactorsurvey__BtbVII_SANGER_5_FBgn0012049	3.03	0.0417	BtbVII (directAnnotation).		3	86	CG8468;dati;NAAT1
geneListName	flyfactorsurvey__Cf2-PA_SOLEXA_FBgn0000286	3.02	0.0416	Cf2 (directAnnotation).		6	330	CG16727;CG16758;CG4213;Cyp4s3;daw;NAAT1

## Sheet: female
geneSet	motif	NES	AUC	TF_highConf	TF_lowConf	nEnrGenes	rankAtMax	enrichedGenes
geneListName	transfac_pro__M00640	5.82	0.0829	Dfd (inferredBy_Orthology).		8	1264	CG12517;CG12708;CG15820;CG30343;CG32834;CG5568;CR45453;Fad2
geneListName	cisbp__M2051	5.32	0.0768	slbo (directAnnotation).		7	804	CG12517;CG12708;CG12721;CG18586;CG5568;CR44289;CR45453
geneListName	transfac_pro__M02085	5.28	0.0762	Blimp-1 (inferredBy_Orthology).		4	172	CG31262;CG5568;CR43857;Fad2
geneListName	cisbp__M6159	5.20	0.0752	Blimp-1 (inferredBy_Orthology).		5	458	CG30343;CG31262;CG5568;CR43857;Fad2
geneListName	transfac_pro__M03205	4.91	0.0717			4	211	CG12721;CG5568;CR44984;Fad2
geneListName	transfac_pro__M05135	4.90	0.0717			4	172	CG12721;CG5568;CR44984;Fad2
geneListName	transfac_pro__M04999	4.88	0.0713			4	172	CG12721;CG5568;CR44984;Fad2
geneListName	jaspar__MA0602.1	4.85	0.0710			4	253	CG12721;CG31262;CG5568;CR44984
geneListName	transfac_pro__M05107	4.76	0.0698			4	172	CG12721;CG5568;CR44984;Fad2
geneListName	transfac_pro__M05053	4.64	0.0684			4	172	CG12721;CG5568;CR44984;Fad2
geneListName	hdpi__MRPS25	4.63	0.0683	mRpS25 (inferredBy_Orthology).		14	3674	CG12517;CG12708;CG12721;CG15047;CG15820;CG18586;CG30343;CG32834;CG5568;CR44984;CR45453;Fad2;Send1;spn-D
geneListName	transfac_pro__M04973	4.60	0.0679			4	253	CG12721;CG5568;CR44984;Fad2
geneListName	transfac_pro__M03190	4.55	0.0673			4	253	CG12721;CG5568;CR44984;Fad2
geneListName	transfac_pro__M05044	4.52	0.0670			4	211	CG12721;CG5568;CR44984;Fad2
geneListName	cisbp__M4873	4.46	0.0662	CG6276 (directAnnotation).		4	290	CG12517;CG12708;Fad2;sro
geneListName	transfac_pro__M05139	4.46	0.0662			4	290	CG12721;CG5568;CR44984;Fad2
geneListName	hdpi__LHX4	4.44	0.0660	Lim3 (inferredBy_Orthology).		4	290	CG12721;CG30343;CG31262;Ilp7
geneListName	transfac_pro__M04663	4.37	0.0651			5	733	CG12721;CG13113;CG31262;CG5568;sro
geneListName	transfac_pro__M05027	4.35	0.0649			4	211	CG12721;CG5568;CR44984;Fad2
geneListName	cisbp__M1195	4.35	0.0649			7	881	CG12517;CG12708;CG12721;CG15820;CG30343;CG5568;Fad2
geneListName	cisbp__M0465	4.32	0.0646			4	253	CG15571;CG31262;CR44984;Fad2
geneListName	hocomoco__BCL6_HUMAN.H10MO.C	4.32	0.0645	Blimp-1 (inferredBy_Orthology).		5	733	CG30343;CG31262;CG5568;CR43857;Fad2
geneListName	neph__UW.Motif.0441	4.30	0.0643			14	3920	CG12517;CG12708;CG14218;CG15820;CG30343;CG31262;CG32834;CG5568;Cp38;CR44111;CR44984;CR45453;Fad2;Send1
geneListName	cisbp__M2265	4.29	0.0641	Blimp-1 (inferredBy_Orthology).	Stat92E (inferredBy_MotifSimilarity_n_Orthology).	3	90	CG5568;CR43857;Fad2
geneListName	transfac_pro__M05057	4.27	0.0640			4	458	CG12721;CG5568;CR44984;Fad2
geneListName	cisbp__M1995	4.26	0.0638	Dfd (directAnnotation).	Scr; ems; zen2 (inferredBy_MotifSimilarity).	4	378	CG12721;CG30343;CG31262;Ilp7
geneListName	hocomoco__BCL6_MOUSE.H10MO.C	4.25	0.0637	Blimp-1 (inferredBy_Orthology).	Stat92E (inferredBy_MotifSimilarity_n_Orthology).	3	46	CG5568;CR43857;Fad2
geneListName	jaspar__MA0463.1	4.25	0.0636	Blimp-1 (inferredBy_Orthology).	Stat92E (inferredBy_MotifSimilarity_n_Orthology).	2	4	CG5568;Fad2
geneListName	predrem__nrMotif1123	4.23	0.0634			3	82	CG12517;CG12708;CR45453
geneListName	cisbp__M5360	4.23	0.0634	E2f2 (inferredBy_Orthology).	E2f1 (inferredBy_MotifSimilarity_n_Orthology).	5	629	CG12708;CG12721;CG30343;CG5568;Fad2
geneListName	jaspar__MA0186.1	4.21	0.0632	Dfd (directAnnotation).	ems; zen2 (inferredBy_MotifSimilarity).	4	378	CG12721;CG30343;CG31262;Ilp7
geneListName	transfac_pro__M08824	4.18	0.0628		Eip74EF; Ets21C; Ets96B (inferredBy_MotifSimilarity).Atac3; Ets97D; aop; pnt (inferredBy_MotifSimilarity_n_Orthology).	5	573	CG31262;CG5568;CR42723;Fad2;Send1
geneListName	homer__NNNGCATGTCCNGACATGCC_p63	4.18	0.0628			6	1057	CG14187;CG30343;CG31262;CG5568;CR43857;Fad2
geneListName	cisbp__M5362	4.18	0.0628		E2f2 (inferredBy_MotifSimilarity_n_Orthology).	14	3460	CG10163;CG11674;CG12517;CG12708;CG12721;CG14218;CG17239;CG30343;CG31262;CG42780;CR40182;CR45756;Fad2;Send1
geneListName	transfac_pro__M07687	4.15	0.0624	maf-S (directAnnotation).	tj (inferredBy_MotifSimilarity_n_Orthology).	6	658	CG30343;CG31262;CG5568;CR44984;Fad2;Vm26Ab
geneListName	homer__GCACGTACCC_HIF2a	4.12	0.0620	sima (inferredBy_Orthology).		20	4379	CG10163;CG12517;CG12721;CG13113;CG15571;CG15721;CG15820;CG30343;CG31262;CG4009;CG42780;CG5568;Cp36;Cp38;CR43857;CR44289;CR44984;Fad2;Muc12Ea;Send1
geneListName	hocomoco__DLX3_HUMAN.H10MO.C	4.10	0.0618			4	253	CG12517;CG30343;CR45453;Fad2
geneListName	flyfactorsurvey__CG18599_SOLEXA_FBgn0038592	4.08	0.0615	CG18599 (directAnnotation).	Antp; Awh; CG11294; Dfd; E5; Lim1; Lim3; Scr; Ubx; Vsx1; abd-A; ap; btn; ems; eve; ftz; hbn; ind; lab; lbl; otp; pb; ro; unpg; zen; zen2 (inferredBy_MotifSimilarity).	4	336	CG12721;CG30343;CG31262;Ilp7
geneListName	flyfactorsurvey__CG4404_SANGER_5_FBgn0030432	4.06	0.0613	CG4404 (directAnnotation).		5	573	CG12721;CG31262;CG5568;CR44984;Fad2
geneListName	cisbp__M4834	4.02	0.0608	CG18599 (directAnnotation).	Antp; Awh; CG11294; Dfd; E5; Lim1; Lim3; Pph13; Scr; Ubx; Vsx1; abd-A; ap; btn; ems; eve; ftz; hbn; ind; lab; lbl; otp; pb; ro; unpg; zen; zen2 (inferredBy_MotifSimilarity).	4	336	CG12721;CG30343;CG31262;Ilp7
geneListName	predrem__nrMotif1157	4.01	0.0607			4	380	CG12517;CG14218;CR45453;Fad2
geneListName	hdpi__RBM22	4.01	0.0607	CG14641 (inferredBy_Orthology).		9	1921	CG11382;CG12517;CG12721;CG15047;CG30343;CG32834;CG5568;CR44984;CR45453
geneListName	homer__AACATGCCCAGACATGCCCN_p53	3.99	0.0604			3	172	CG14187;CG30343;CR43857
geneListName	transfac_pro__M07138	3.94	0.0598			4	378	CG14187;CG30343;CG31262;CR43857
geneListName	transfac_pro__M07428	3.91	0.0595	Optix (inferredBy_Orthology).		4	339	CG13113;CG31262;CG5568;Send1
geneListName	cisbp__M1998	3.90	0.0594	E5 (directAnnotation).	Antp; Awh; CG11294; CG18599; CG32532; CG9876; Dfd; Lim1; Lim3; Lmx1a; Pph13; Rx; Scr; Ubx; Vsx1; Vsx2; abd-A; al; ap; btn; ems; en; eve; ftz; hbn; ind; inv; lab; lbl; lms; otp; pb; repo; ro; slou; unpg; zen; zen2 (inferredBy_MotifSimilarity).unc-4; vvl (inferredBy_MotifSimilarity_n_Orthology).	4	386	CG12721;CG30343;CG31262;Ilp7
geneListName	hocomoco__P73_HUMAN.H10MO.A	3.89	0.0593			5	766	CG14187;CG30343;CG31262;CR43857;Fad2
geneListName	cisbp__M1147	3.88	0.0592			10	2223	CG12708;CG15571;CG15820;CG30343;CG31262;CG5568;CR43857;Fad2;spn-D;sro
geneListName	transfac_pro__M03175	3.86	0.0590			3	211	CG12721;CG5568;Fad2
geneListName	transfac_pro__M03182	3.86	0.0589			4	336	CG12708;CG30343;CG5568;Fad2
geneListName	cisbp__M4672	3.86	0.0589	E2f1 (directAnnotation).		5	733	CG12708;CG12721;CG30343;CR44984;Fad2
geneListName	transfac_pro__M04998	3.86	0.0589			4	378	CG12721;CG5568;CR44984;Fad2
geneListName	hocomoco__P63_HUMAN.H10MO.A	3.85	0.0588			4	467	CG14187;CG30343;CG31262;CR43857
geneListName	taipale_tf_pairs__E2F1_EOMES_NGGTGTGNNNGGCGCSNNNCRC_CAP_repr	3.84	0.0586	E2f1 (inferredBy_Orthology).		16	4379	CG10163;CG11381;CG12517;CG12708;CG12721;CG14187;CG30343;CG42780;CG5568;CR44984;CR45453;CR45756;Fad2;Send1;spn-D;sro
geneListName	flyfactorsurvey__CG6276_SANGER_5_FBgn0038316	3.83	0.0585	CG6276 (directAnnotation).		3	211	CG12517;CG12708;Fad2
geneListName	cisbp__M6117	3.81	0.0583			3	172	CG14187;CG30343;CR43857
geneListName	transfac_pro__M04971	3.81	0.0582			5	733	CG12721;CG5568;CR44984;Fad2;Ilp7
geneListName	cisbp__M2050	3.79	0.0581	sd (directAnnotation).		4	411	CG12517;CG12721;CG5568;CR45453
geneListName	taipale__E2F4_DBD_AATGGCGCCAAA	3.79	0.0580	E2f2 (inferredBy_Orthology).	E2f1 (inferredBy_MotifSimilarity_n_Orthology).	7	1540	CG12708;CG12721;CG14187;CG14218;CG30343;CG5568;Fad2
geneListName	flyfactorsurvey__dm_Max_SANGER_10_FBgn0000472	3.78	0.0579	Myc (directAnnotation).	Max (inferredBy_MotifSimilarity).	4	458	CG12517;CG30343;CR43857;Fad2
geneListName	jaspar__MA0189.1	3.78	0.0579		Antp; Awh; CG11294; CG18599; CG32532; CG9876; Dfd; E5; Lim1; Lim3; Lmx1a; Pph13; Rx; Scr; Ubx; Vsx1; Vsx2; abd-A; al; ap; btn; ems; en; eve; ftz; hbn; ind; inv; lab; lbl; lms; otp; pb; repo; ro; slou; unpg; zen; zen2 (inferredBy_MotifSimilarity).unc-4; vvl (inferredBy_MotifSimilarity_n_Orthology).	4	411	CG12721;CG30343;CG31262;Ilp7
geneListName	cisbp__M2321	3.77	0.0578			4	458	CG14187;CG30343;CG31262;CR43857
geneListName	cisbp__M4866	3.77	0.0578	CG4404 (directAnnotation).		4	412	CG12721;CG31262;CR44984;Fad2
geneListName	jaspar__MA0256.1	3.77	0.0578	zen (directAnnotation).	Dfd; ems; eve; pb (inferredBy_MotifSimilarity).	5	733	CG12721;CG30343;CG31262;Fad2;Ilp7
geneListName	transfac_pro__M05048	3.76	0.0576			4	411	CG12721;CG5568;CR44984;Fad2
geneListName	cisbp__M6335	3.75	0.0575	Max (inferredBy_Orthology).	Myc (inferredBy_MotifSimilarity_n_Orthology).	10	2597	CG12517;CG15571;CG17239;CG30343;CG5568;CR43857;CR44289;CR44984;Fad2;Send1
geneListName	hocomoco__MAX_HUMAN.H10MO.A	3.75	0.0575	Max (inferredBy_Orthology).	Myc (inferredBy_MotifSimilarity_n_Orthology).	10	2498	CG12517;CG15571;CG17239;CG30343;CG5568;CR43857;CR44289;CR44984;Fad2;Send1
geneListName	cisbp__M4711	3.73	0.0574		eve (inferredBy_MotifSimilarity).Dp; E2f1; E2f2 (inferredBy_MotifSimilarity_n_Orthology).	5	653	CG12708;CG12721;CG30343;CG5568;Fad2
geneListName	transfac_pro__M03206	3.73	0.0573			3	110	CG5568;CR44984;Fad2
geneListName	transfac_pro__M07232	3.71	0.0571			3	46	CG14187;CG30343;CR43857
geneListName	cisbp__M1929	3.70	0.0570			3	46	CG14187;CG30343;CR43857
geneListName	cisbp__M5355	3.68	0.0568	E2f1 (inferredBy_Orthology).	E2f2 (inferredBy_MotifSimilarity_n_Orthology).	12	2845	CG10163;CG12708;CG12721;CG30343;CG31262;CG33470;CG5568;Cp36;CR44984;CR45756;Fad2;Send1
geneListName	transfac_pro__M05166	3.67	0.0566			4	573	CG12721;CG5568;CR44984;Fad2
geneListName	flyfactorsurvey__slbo_FlyReg_FBgn0005638	3.66	0.0565	slbo (directAnnotation).		10	1921	CG12517;CG12708;CG12721;CG15820;CG18586;CG30343;CG5568;CR44289;CR45453;Fad2
geneListName	transfac_pro__M05035	3.65	0.0564			4	573	CG12721;CG5568;CR44984;Fad2
geneListName	tfdimers__MD00302	3.64	0.0563			4	342	CG12517;CG12708;CG5568;Send1
geneListName	cisbp__M5357	3.62	0.0560	E2f1 (inferredBy_Orthology).	E2f2 (inferredBy_MotifSimilarity_n_Orthology).	6	954	CG12708;CG12721;CG14218;CG30343;CG5568;Fad2
geneListName	transfac_pro__M07375	3.62	0.0560	Blimp-1 (inferredBy_Orthology).	Stat92E (inferredBy_MotifSimilarity_n_Orthology).	3	57	CG5568;CR43857;Fad2
geneListName	taipale__FOXC1_DBD_WRWRTMAAYAW	3.61	0.0558	croc (inferredBy_Orthology).	fd59A; fd96Ca; fkh (inferredBy_MotifSimilarity).eve; fd96Cb (inferredBy_MotifSimilarity_n_Orthology).	3	100	CG14187;CG31262;CR44984
geneListName	cisbp__M5441	3.60	0.0558	croc (inferredBy_Orthology).	fd59A; fd96Ca; fkh (inferredBy_MotifSimilarity).eve; fd96Cb (inferredBy_MotifSimilarity_n_Orthology).	3	101	CG14187;CG31262;CR44984
geneListName	predrem__nrMotif911	3.58	0.0555			13	2597	CG12517;CG12708;CG12721;CG14187;CG15047;CG15820;CG30343;CG32834;CG42780;CR44984;CR45453;Fad2;sro
geneListName	transfac_public__M00118	3.57	0.0554	Max; Myc (inferredBy_Orthology).		13	3325	CG12517;CG12721;CG15571;CG17239;CG30343;CG33470;CG5568;CR43857;CR44289;CR44984;Fad2;Send1;spn-D
geneListName	predrem__nrMotif667	3.57	0.0553			4	573	CG31262;CG5568;CR43857;Fad2
geneListName	transfac_pro__M05169	3.56	0.0552			4	573	CG12721;CG5568;CR44984;Fad2
geneListName	homer__NNNCTTTCCAGGAAA_Bcl6	3.55	0.0551	Blimp-1 (inferredBy_Orthology).	Stat92E (inferredBy_MotifSimilarity_n_Orthology).	3	172	CG5568;CR43857;Fad2
geneListName	cisbp__M2063	3.55	0.0551	zen (directAnnotation).	ems; eve; pb (inferredBy_MotifSimilarity).	5	573	CG12721;CG30343;CG31262;Fad2;Ilp7
geneListName	homer__ATTTTCCATT_NFAT	3.55	0.0551	NFAT (inferredBy_Orthology).	Jra; kay (inferredBy_MotifSimilarity_n_Orthology).	8	777	CG12517;CG12708;CG12721;CG30343;CG31262;CG42704;CR45453;Send1
geneListName	cisbp__M5750	3.54	0.0550			3	172	CG42780;CR44984;Fad2
geneListName	cisbp__M4918	3.54	0.0550	Myc (directAnnotation).	Max (inferredBy_MotifSimilarity).	4	411	CG12517;CG30343;CR43857;Fad2
geneListName	neph__UW.Motif.0352	3.53	0.0549			3	172	CG12517;CG5568;CR45453
geneListName	cisbp__M4682	3.52	0.0548	cnc (inferredBy_Orthology).		4	573	Cp38;CR44984;Fad2;Vm26Ab
geneListName	transfac_pro__M07858	3.52	0.0548	rib (directAnnotation).		10	2110	CG12517;CG12708;CG12721;CG18586;CG30343;CG31262;CG5568;CR44984;CR45453;Fad2
geneListName	transfac_pro__M02776	3.52	0.0548	maf-S (inferredBy_Orthology).	cic; tj (inferredBy_MotifSimilarity_n_Orthology).	7	1264	CG30343;CG31262;CG5568;CR44984;Fad2;Send1;Vm26Ab
geneListName	transfac_pro__M05702	3.51	0.0546			5	733	CG12721;CG30343;CG33470;CG5568;Fad2
geneListName	predrem__nrMotif2257	3.51	0.0546			4	573	CG12721;CR43857;CR44984;Fad2
geneListName	scertf__spivak.HAP1	3.49	0.0544			5	513	CG12517;CG12721;CG5568;CR45453;Fad2
geneListName	jaspar__MA0960.1	3.48	0.0543		E(spl)m3-HLH; E(spl)m5-HLH; E(spl)mbeta-HLH; E(spl)mdelta-HLH; E(spl)mgamma-HLH; Hey; Sidpn; dpn; h (inferredBy_MotifSimilarity).	5	629	CG12517;CG30343;CG5568;Fad2;Send1
geneListName	tiffin__TIFDMEM0000014	3.48	0.0542			3	253	CG12517;Cp38;Fad2
geneListName	transfac_pro__M07545	3.47	0.0542			3	110	CG12517;CG5568;Fad2
geneListName	transfac_pro__M05140	3.47	0.0542			3	94	CG12721;CG5568;Fad2
geneListName	cisbp__M6115	3.47	0.0542			3	101	CG14187;CG30343;CR43857
geneListName	transfac_pro__M05105	3.47	0.0541			3	172	CG12721;CG5568;Fad2
geneListName	cisbp__M5689	3.46	0.0540	tj (inferredBy_Orthology).	maf-S (inferredBy_MotifSimilarity_n_Orthology).	9	2061	CG12517;CG30343;CG31262;CG5568;CR44984;Fad2;Send1;spo;Vm26Ab
geneListName	transfac_pro__M07783	3.43	0.0537	Dfd (directAnnotation).	ems; eve; zen (inferredBy_MotifSimilarity).	3	172	CG12721;CG30343;Fad2
geneListName	elemento__CCTGCCC	3.43	0.0537			4	574	CG12708;CG5568;Fad2;sro
geneListName	transfac_pro__M07805	3.42	0.0536	lbe (directAnnotation).		4	513	CG12721;CG31262;Fad2;Ilp7
geneListName	elemento__TTGACAA	3.42	0.0536			6	804	CG12721;CG30343;CG31262;CG5568;CR44984;Fad2
geneListName	hdpi__RBMS1	3.41	0.0534	shep (inferredBy_Orthology).		12	3460	CG10163;CG12517;CG15820;CG18586;CG30343;CG31262;CG5568;CR44289;CR44984;CR45453;Fad2;Send1
geneListName	cisbp__M1955	3.40	0.0533	Stat92E (inferredBy_Orthology).	Blimp-1 (inferredBy_MotifSimilarity_n_Orthology).	3	211	CG5568;CR43857;Fad2
geneListName	jaspar__MA0334.1	3.39	0.0532			5	573	CG12708;CG15820;CG30343;CG31262;Fad2
geneListName	transfac_pro__M01935	3.39	0.0532			5	573	CG12708;CG15820;CG30343;CG31262;Fad2
geneListName	transfac_pro__M01154	3.38	0.0531	Myc (inferredBy_Orthology).	Clk; Hesr; Hey; Max; Mitf; Mnt; Mondo; Oli; Usf; cyc; emc; tgo (inferredBy_MotifSimilarity_n_Orthology).	16	4153	CG12517;CG12708;CG12721;CG15571;CG17239;CG30343;CG33470;CG42780;CG5568;Cp36;CR43857;CR44289;CR44984;Fad2;Send1;spn-D
geneListName	transfac_pro__M06567	3.38	0.0531			3	253	CG31262;CG5568;CR44984
geneListName	transfac_pro__M00920	3.38	0.0531	Dp; E2f1; E2f2 (inferredBy_Orthology).		12	3309	CG10163;CG11382;CG12708;CG12721;CG14187;CG18586;CG30343;CG33470;CG5568;CR44984;Fad2;Send1
geneListName	transfac_pro__M06272	3.37	0.0529			3	110	CG12517;CR45453;Fad2
geneListName	elemento__ACGTGCT	3.36	0.0528			17	4894	CG10163;CG12517;CG12721;CG15571;CG15820;CG17239;CG30343;CG31262;CG33470;CG4009;CG5568;CR43857;CR44289;CR44984;Fad2;Send1;sro
geneListName	jaspar__MA0137.3	3.36	0.0528	Stat92E (inferredBy_Orthology).	Blimp-1 (inferredBy_MotifSimilarity_n_Orthology).	3	253	CG5568;CR43857;Fad2
geneListName	transfac_pro__M01890	3.36	0.0528	Stat92E (inferredBy_Orthology).	Blimp-1 (inferredBy_MotifSimilarity_n_Orthology).	3	172	CG5568;CR43857;Fad2
geneListName	transfac_pro__M01145	3.35	0.0527	Myc (inferredBy_Orthology).	Max (inferredBy_MotifSimilarity_n_Orthology).	13	2597	CG12517;CG12708;CG12721;CG15571;CG17239;CG30343;CG33470;CG5568;CR43857;CR44289;CR44984;Fad2;spn-D
geneListName	hdpi__KLF3	3.35	0.0527	CG42741 (inferredBy_Orthology).		15	3985	CG12517;CG12708;CG12721;CG15820;CG30343;CG31262;CG42704;CG5568;CR44289;CR44984;CR45453;Fad2;Ilp7;Send1;sro
geneListName	transfac_pro__M04641	3.35	0.0527	CHES-1-like (directAnnotation).	FoxP (inferredBy_MotifSimilarity).fd102C; foxo (inferredBy_MotifSimilarity_n_Orthology).	4	660	CG31262;CG42780;CG5568;Send1
geneListName	flyfactorsurvey__sd_FlyReg_FBgn0003345	3.34	0.0526	sd (directAnnotation).		5	751	CG12517;CG12721;CG5568;CR44984;CR45453
geneListName	cisbp__M0924	3.34	0.0526		pdm3 (inferredBy_MotifSimilarity_n_Orthology).	7	1679	CG12721;CG30343;CG31262;CG5568;Fad2;Ilp7;Send1
geneListName	cisbp__M4641	3.34	0.0526	Stat92E (inferredBy_Orthology).		3	253	CG5568;CR43857;Fad2
geneListName	transfac_pro__M07311	3.34	0.0526	Stat92E (inferredBy_Orthology).	Blimp-1 (inferredBy_MotifSimilarity_n_Orthology).	3	172	CG5568;CR43857;Fad2
geneListName	cisbp__M6189	3.33	0.0525			6	1264	CG12517;CG30343;CR44984;CR45453;Fad2;sro
geneListName	hocomoco__ZN333_HUMAN.H10MO.D	3.33	0.0524			11	2767	CG12517;CG12721;CG15721;CG30343;CG43255;CG5568;CR44289;CR45453;Fad2;Ilp7;sro
geneListName	taipale__E2F3_DBD_NNAAATGGCGCCATTTNN	3.32	0.0523	E2f1 (inferredBy_Orthology).		7	1495	CG12708;CG12721;CG14218;CG15820;CG30343;CR44289;Fad2
geneListName	transfac_pro__M06693	3.32	0.0523			4	458	CG12721;CG31262;CG5568;Ilp7
geneListName	transfac_pro__M05068	3.32	0.0523			3	172	CG5568;CR44984;Fad2
geneListName	transfac_pro__M05000	3.32	0.0523			6	1179	CG12721;CG31262;CG5568;CR44984;Fad2;Ilp7
geneListName	tfdimers__MD00548	3.31	0.0522	Myc (inferredBy_Orthology).		3	114	CG30343;CG31262;Cp38
geneListName	transfac_pro__M06307	3.31	0.0522			7	954	CG12517;CG14187;CG14218;CG5568;CR42723;CR44984;CR45453
geneListName	cisbp__M1961	3.30	0.0521	Stat92E (inferredBy_Orthology).		3	253	CG5568;CR43857;Fad2
geneListName	transfac_pro__M06027	3.30	0.0521			7	1830	CG15820;CG31262;CG5568;CR43857;CR44984;Ilp7;sro
geneListName	taipale__E2F2_DBD_AAAAATGGCGCCAAAANN	3.30	0.0520	E2f1 (inferredBy_Orthology).	E2f2 (inferredBy_MotifSimilarity_n_Orthology).	6	1057	CG12708;CG12721;CG14218;CG30343;CG5568;Fad2
geneListName	taipale__Tp73_DBD_NRCATGYYNNRRCAYGYN	3.30	0.0520			3	181	CG14187;CG30343;CR43857
geneListName	transfac_pro__M05352	3.29	0.0519			4	378	CG30343;CG31262;CG5568;CR44984
geneListName	transfac_pro__M07767	3.29	0.0519	bcd (directAnnotation).	Gsc; oc (inferredBy_MotifSimilarity).Ptx1 (inferredBy_MotifSimilarity_n_Orthology).	6	1264	CG12708;CG14218;CG18586;CG31262;CG5568;Fad2
geneListName	hdpi__TPPP	3.28	0.0518	CG45057 (inferredBy_Orthology).		4	458	CG12721;CG31262;CG5568;Fad2
geneListName	predrem__nrMotif992	3.27	0.0517			4	489	CG5568;Fad2;Send1;sro
geneListName	jaspar__MA0144.2	3.27	0.0517	Stat92E (inferredBy_Orthology).		3	290	CG5568;CR43857;Fad2
geneListName	cisbp__M6106	3.27	0.0517			3	211	CG14187;CG30343;CR43857
geneListName	transfac_pro__M03174	3.26	0.0515			3	172	CG12721;CG5568;CR44984
geneListName	transfac_pro__M07546	3.26	0.0515			5	733	CG12708;CG15820;CG30343;CG5568;sro
geneListName	taipale__NRL_DBD_NNNNTGCTGAN	3.25	0.0515	tj (inferredBy_Orthology).	maf-S (inferredBy_MotifSimilarity_n_Orthology).	8	1830	CG30343;CG31262;CG5568;CR44984;Fad2;Send1;spo;Vm26Ab
geneListName	transfac_public__M00050	3.25	0.0515	E2f1; E2f2 (inferredBy_Orthology).	eve (inferredBy_MotifSimilarity).Dp; Rbf; Rbf2 (inferredBy_MotifSimilarity_n_Orthology).	7	1584	CG10163;CG12708;CG12721;CG30343;CG31262;CG5568;Fad2
geneListName	flyfactorsurvey__E_spl__SANGER_5_FBgn0000591	3.24	0.0514	E(spl)m8-HLH (directAnnotation).	E(spl)m3-HLH; E(spl)m5-HLH; E(spl)m7-HLH; E(spl)mbeta-HLH; E(spl)mdelta-HLH; E(spl)mgamma-HLH; Sidpn; dpn (inferredBy_MotifSimilarity).	15	4465	CG12517;CG12721;CG14187;CG15571;CG15820;CG17239;CG30343;CG31262;CG32834;CG4009;CG5568;Cp38;CR44984;Fad2;Send1
geneListName	cisbp__M2348	3.24	0.0514		bs (inferredBy_MotifSimilarity_n_Orthology).	3	253	CG15820;CG5568;Send1
geneListName	transfac_pro__M07064	3.24	0.0513	Stat92E (inferredBy_Orthology).		3	290	CG5568;CR43857;Fad2
geneListName	transfac_pro__M05165	3.23	0.0512			3	172	CG5568;CR44984;Fad2
geneListName	homer__NATTTCCNGGAAAT_STAT1	3.22	0.0511	Stat92E (inferredBy_Orthology).		2	24	CG5568;Fad2
geneListName	transfac_pro__M07335	3.22	0.0511	so (inferredBy_Orthology).		3	290	CG5568;Cp38;Fad2
geneListName	cisbp__M0159	3.22	0.0511		E(spl)m3-HLH; E(spl)m5-HLH; E(spl)mbeta-HLH; E(spl)mdelta-HLH; E(spl)mgamma-HLH; Hey; Sidpn; dpn; h (inferredBy_MotifSimilarity).	11	2597	CG12517;CG12721;CG15571;CG15820;CG17239;CG30343;CG5568;Cp38;CR44984;Fad2;Send1
geneListName	transfac_pro__M01004	3.22	0.0511			4	476	CG12517;CG12708;CR44984;CR45453
geneListName	cisbp__M0849	3.22	0.0511			7	881	CG12721;CG31262;CG5568;CR44984;Fad2;Ilp7;Send1
geneListName	jaspar__MA0555.1	3.22	0.0511		bs (inferredBy_MotifSimilarity_n_Orthology).	3	253	CG15820;CG5568;Send1
geneListName	flyfactorsurvey__Zen2_SOLEXA_FBgn0004054	3.21	0.0510	zen2 (directAnnotation).	Antp; Awh; C15; CG11294; CG18599; CG32532; CG9876; Dfd; E5; HGTX; Lim1; Lim3; Pph13; Rx; Scr; Ubx; Vsx1; abd-A; ap; bsh; btn; ems; en; eve; ftz; hbn; ind; lab; lbe; lbl; lms; otp; pb; repo; ro; slou; unpg; zen (inferredBy_MotifSimilarity).	4	573	CG12721;CG30343;CG31262;Ilp7
geneListName	transfac_pro__M06662	3.21	0.0510			11	2796	CG11381;CG11382;CG12517;CG12708;CG12721;CG30343;CG32834;CR43857;CR44289;Ilp7;sro
geneListName	taipale__E2F3_DBD_NNAAATGGCGCCAAAANN_repr	3.21	0.0510	E2f1 (inferredBy_Orthology).	E2f2 (inferredBy_MotifSimilarity_n_Orthology).	8	1796	CG11381;CG12708;CG12721;CG14218;CG15820;CG30343;CG5568;Fad2
geneListName	predrem__nrMotif1413	3.21	0.0509			3	290	CR42723;Fad2;Ilp7
geneListName	homer__CCCACGTGCT_Pho2	3.21	0.0509			9	2464	CG12517;CG17239;CG30343;CG42704;CG5568;CR43857;CR44289;Fad2;Send1
geneListName	transfac_pro__M04752	3.19	0.0508	vtd (inferredBy_Orthology).		5	766	CG12517;CG12721;CG5568;CR44984;CR45453
geneListName	transfac_pro__M01651	3.19	0.0507			3	217	CG14187;CG30343;CR43857
geneListName	hocomoco__TEAD3_HUMAN.H10MO.D	3.19	0.0507			3	172	CG5568;CR44984;Fad2
geneListName	elemento__AGGATGC	3.18	0.0506			13	3841	CG12721;CG15820;CG18586;CG30343;CG31262;CG42780;CG5568;CR40182;CR43857;Fad2;Send1;spn-D;sro
geneListName	transfac_pro__M03204	3.18	0.0506			5	828	CG12721;CG13113;CG5568;CR44984;Fad2
geneListName	swissregulon__sacCer__HAP3	3.18	0.0506	Chrac-14; Nf-YB (inferredBy_Orthology).	Nf-YA; Nf-YC; kay (inferredBy_MotifSimilarity_n_Orthology).	4	582	CG30343;CG32834;CG5568;Fad2
geneListName	transfac_pro__M05110	3.18	0.0505			4	490	CG12721;CG30343;CG5568;Fad2
geneListName	elemento__TAATTGCA	3.17	0.0505			3	172	CG12517;CG30343;CR45453
geneListName	taipale__TP63_DBD_RACATGTYNNRACATGTC	3.17	0.0505			4	629	CG14187;CR43857;CR44984;Fad2
geneListName	transfac_pro__M04989	3.16	0.0504			3	211	CG5568;CR44984;Fad2
geneListName	cisbp__M5279	3.16	0.0504	zen2 (directAnnotation).	Antp; Awh; C15; CG11294; CG18599; CG32532; CG9876; Dfd; E5; HGTX; Lim1; Lim3; Pph13; Rx; Scr; Ubx; Vsx1; abd-A; ap; bsh; btn; ems; en; eve; ftz; hbn; ind; lab; lbe; lbl; lms; otp; pb; repo; ro; slou; unpg; zen (inferredBy_MotifSimilarity).	4	599	CG12721;CG30343;CG31262;Ilp7
geneListName	taipale__E2F7_DBD_TTTTCCCGCCAAAW_repr	3.16	0.0504		E2f2 (inferredBy_MotifSimilarity_n_Orthology).	16	3215	CG10163;CG11674;CG12517;CG12708;CG12721;CG14218;CG15820;CG17239;CG18586;CG30343;CG31262;CG42780;CR40182;CR45756;Fad2;Send1
geneListName	cisbp__M0925	3.15	0.0502		pdm3 (inferredBy_MotifSimilarity_n_Orthology).	4	458	CG12721;CG30343;CG31262;Ilp7
geneListName	transfac_pro__M05643	3.15	0.0502	jim (inferredBy_Orthology).		4	573	CG18586;CG30343;CG5568;CR44984
geneListName	homer__TTCGCGCGAAAA_E2F	3.14	0.0502		Dp; E2f1; E2f2 (inferredBy_MotifSimilarity_n_Orthology).	4	387	CG12708;CG12721;CG30343;CG5568
geneListName	hocomoco__MAFA_HUMAN.H10MO.D	3.14	0.0502	tj (inferredBy_Orthology).		4	493	CG31262;CG32834;CG5568;Fad2
geneListName	tfdimers__MD00579	3.14	0.0502	CG7786; Pdp1; gt (inferredBy_Orthology).		7	1796	CG12517;CG30343;CG31262;CG5568;CR43857;CR44289;Fad2
geneListName	flyfactorsurvey__br-Z1_FlyReg_FBgn0000210	3.13	0.0500	br (directAnnotation).		13	3215	CG11382;CG12517;CG14187;CG15820;CG18586;CG30343;CG32834;CG5568;CR44984;CR45453;Fad2;Ilp7;Send1
geneListName	predrem__nrMotif81	3.13	0.0500			6	1119	CG12708;CG15820;CG5568;CR44984;Fad2;sro
geneListName	transfac_public__M00137	3.13	0.0500	nub; pdm2 (inferredBy_Orthology).		6	1057	CG12721;CG30343;CG31262;CG5568;Fad2;Ilp7
geneListName	cisbp__M6330	3.12	0.0499	tj (inferredBy_Orthology).		4	477	CG31262;CG32834;CG5568;Fad2
geneListName	predrem__nrMotif2466	3.12	0.0499			4	573	CG12708;CG12721;CG5568;Fad2
geneListName	cisbp__M6555	3.12	0.0498			11	2845	CG12517;CG12721;CG15721;CG30343;CG43255;CG5568;CR44289;CR45453;Fad2;Ilp7;sro
geneListName	transfac_pro__M05877	3.11	0.0498	pad; zld (inferredBy_Orthology).		4	599	CG11382;CG14218;CG31262;CG5568
geneListName	predrem__nrMotif867	3.11	0.0497			3	172	CG12708;Cp38;Fad2
geneListName	jaspar__MA0203.1	3.11	0.0497	Scr (directAnnotation).	CG18599; Dfd; E5; bsh; btn; ems; eve; pb; zen; zen2 (inferredBy_MotifSimilarity).	4	629	CG12721;CG30343;CG31262;Ilp7
geneListName	jaspar__MA0519.1	3.10	0.0496	Stat92E (inferredBy_Orthology).		3	336	CG5568;CR43857;Fad2
geneListName	swissregulon__hs__IKZF2.p2	3.10	0.0496			4	458	CG12517;CG12708;CR44984;CR45453
geneListName	hdpi__PCK2	3.09	0.0495	CG10924; Pepck (inferredBy_Orthology).		4	629	CG42780;CG5568;CR43857;sro
geneListName	predrem__nrMotif2629	3.09	0.0495			8	1796	CG12517;CG14187;CG30343;CG31262;CR43857;CR44289;CR45453;Fad2
geneListName	transfac_pro__M02908	3.09	0.0495			3	172	CG12517;CG5568;CR45453
geneListName	taipale_tf_pairs__TEAD4_HES7_RCATTCCNNNNNCRCGYGYN_CAP_repr	3.09	0.0495	sd (inferredBy_Orthology).		4	513	CG31262;CR44984;Fad2;spn-D
geneListName	transfac_pro__M05013	3.09	0.0495			5	954	CG12721;CG15047;CG5568;CR44984;Fad2
geneListName	neph__UW.Motif.0532	3.09	0.0495			3	253	CG12517;CG31262;CR45453
geneListName	tfdimers__MD00129	3.09	0.0495	bap (inferredBy_Orthology).		5	988	CG12721;CG30343;CG31262;CG5568;Fad2
geneListName	transfac_pro__M07881	3.08	0.0494	Rfx (directAnnotation).		5	573	CG12517;CG31262;CR44984;CR45453;Fad2
geneListName	neph__UW.Motif.0470	3.08	0.0494			9	2223	CG12517;CG12708;CG12721;CG15820;CG30343;CG32834;CG5568;CR45453;Fad2
geneListName	elemento__CAGCAGC	3.08	0.0493			3	290	CG31262;CG5568;Fad2
geneListName	predrem__nrMotif1740	3.08	0.0493			4	474	CG10163;CG14218;CG30343;CG31262
geneListName	cisbp__M4989	3.07	0.0493	Gsc (directAnnotation).		3	290	CG14218;CG31262;CG5568
geneListName	predrem__nrMotif997	3.06	0.0491			4	653	CG12721;CG31262;CG5568;Fad2
geneListName	taipale__PRDM4_full_TTTCAAGGCYCCC_repr	3.06	0.0491			2	32	CR44984;Fad2
geneListName	hocomoco__STAT1_HUMAN.H10MO.S	3.05	0.0491	Stat92E (inferredBy_Orthology).		2	18	CG5568;Fad2
geneListName	predrem__nrMotif1163	3.05	0.0491			3	253	CG12721;CG31262;Fad2
geneListName	cisbp__M5354	3.05	0.0491	E2f1 (inferredBy_Orthology).	E2f2 (inferredBy_MotifSimilarity_n_Orthology).	6	1179	CG12708;CG12721;CG14218;CG30343;CG5568;Fad2
geneListName	cisbp__M6493	3.05	0.0490	Stat92E (inferredBy_Orthology).		2	18	CG5568;Fad2
geneListName	cisbp__M5594	3.05	0.0490	lbe; lbl (inferredBy_Orthology).		4	629	CG12721;CG30343;CG31262;Ilp7
geneListName	hocomoco__PITX1_HUMAN.H10MO.D	3.05	0.0490	Ptx1 (inferredBy_Orthology).		3	304	CG14218;CG31262;CG5568
geneListName	bergman__Adf1	3.04	0.0489	Adf1 (directAnnotation).		3	290	CG31262;CG5568;Fad2
geneListName	idmmpmm__ems	3.04	0.0489	ems (directAnnotation).		7	1360	CG12721;CG15820;CG30343;CG31262;CG5568;Fad2;Ilp7
geneListName	cisbp__M1726	3.03	0.0488			3	290	CG12708;CG12721;Fad2
geneListName	transfac_pro__M03132	3.03	0.0487		Myc (inferredBy_MotifSimilarity_n_Orthology).	12	3083	CG12517;CG12721;CG15571;CG17239;CG30343;CG42704;CG5568;CR43857;CR44289;CR44984;Fad2;Send1
geneListName	cisbp__M4978	3.02	0.0487	ftz-f1 (directAnnotation).		11	2160	CG10163;CG12517;CG14187;CG14218;CG15820;CG31262;CG5568;CR44111;CR45453;Send1;snRNA:U12:73B
geneListName	swissregulon__hs__MYFfamily.p2	3.02	0.0486	nau (inferredBy_Orthology).		3	253	CG31262;CG5568;Fad2
geneListName	predrem__nrMotif1421	3.01	0.0485			3	290	CG43255;CG5568;Fad2
geneListName	transfac_pro__M02910	3.01	0.0485	Sox102F (inferredBy_Orthology).		3	253	CG12708;CG15820;CG5568
geneListName	cisbp__M0624	3.01	0.0485			3	181	CG31262;CG32834;Fad2
geneListName	cisbp__M0633	3.00	0.0485	dmrt11E (inferredBy_Orthology).		3	336	CG12708;CG15820;CG5568
geneListName	cisbp__M6491	3.00	0.0484	Stat92E (inferredBy_Orthology).	Blimp-1 (inferredBy_MotifSimilarity_n_Orthology).	3	253	CG5568;CR43857;Fad2

## Sheet: male
geneSet	motif	NES	AUC	TF_highConf	TF_lowConf	nEnrGenes	rankAtMax	enrichedGenes
geneListName	predrem__nrMotif1551	5.25	0.102			5	706	CG43938;CG9168;CR43825;CR45231;lectin-21Ca
geneListName	transfac_pro__M03136	5.2	0.101			6	836	CG9168;CR44501;CR45231;Sfp24Bc;Sfp65A;sphinx2
geneListName	transfac_pro__M06032	4.92	0.0965			4	229	CG18301;CG6690;CG9168;lectin-21Ca
geneListName	flyfactorsurvey__pan_FlyReg_FBgn0085432	4.88	0.0959	pan (directAnnotation).		5	591	CG6690;CG9168;CR44501;CR45231;Sfp65A
geneListName	cisbp__M5144	4.83	0.095	pan (directAnnotation).		5	618	CG6690;CG9168;CR44501;CR45231;Sfp65A
geneListName	transfac_pro__M03122	4.82	0.0949			4	433	CR44501;CR45231;Sfp24Bc;sphinx2
geneListName	jaspar__MA0974.1	4.65	0.092			4	367	CG43938;CG9168;Sfp65A;sphinx2
geneListName	cisbp__M0651	4.63	0.0918			4	367	CG43938;CG9168;Sfp65A;sphinx2
geneListName	cisbp__M4810	4.61	0.0914	CG11617 (directAnnotation).		5	591	CG9168;CR43825;CR44501;Sfp24Bc;Sfp24F
geneListName	cisbp__M0451	4.54	0.0903			3	75	CR44501;Sfp65A;sphinx2
geneListName	flyfactorsurvey__CG11617_SOLEXA_FBgn0031232	4.45	0.0887	CG11617 (directAnnotation).		5	591	CG9168;CR43825;CR44501;Sfp24Bc;Sfp24F
geneListName	taipale_tf_pairs__TEAD4_HOXA13_RCATWCCNNNNNNTTTAYNNN_CAP_repr	4.38	0.0877	Abd-B; sd (inferredBy_Orthology).		6	1195	CG43057;CG6690;CR45231;Sfp24Bc;Sfp24F;sphinx2
geneListName	tiffin__TIFDMEM0000038	4.2	0.0846			3	178	CR43825;Sfp24Bc;Sfp65A
geneListName	predrem__nrMotif1491	4.16	0.084			3	178	CG43938;CR44501;sphinx2
geneListName	cisbp__M5903	4.14	0.0837	pan (inferredBy_Orthology).		5	811	CG9168;CR44501;CR45231;Sfp77F;sphinx2
geneListName	transfac_pro__M06151	4.13	0.0835			3	126	CG43938;Sfp24Bc;Sfp65A
geneListName	hdpi__HHAT	4.06	0.0824	rasp (inferredBy_Orthology).		4	395	CG43938;CR44501;Sfp65A;sphinx2
geneListName	taipale__SOX9_full_AACAATRTKCAGWGTT	4.06	0.0824	Sox100B (inferredBy_Orthology).	D; Sox15; Sox21a; Sox21b (inferredBy_MotifSimilarity_n_Orthology).	3	156	CG9168;CR44501;Obp22a
geneListName	transfac_pro__M03858	4.04	0.0821	pan (inferredBy_Orthology).		4	487	CG9168;CR44501;CR45231;Sfp65A
geneListName	transfac_pro__M06437	4.04	0.0821			4	591	CG6690;CG9168;Obp22a;sphinx2
geneListName	taipale__TCF7L1_full_NAASATCAAAGN	4.03	0.0819	pan (inferredBy_Orthology).		4	465	CG9168;CR44501;CR45231;sphinx2
geneListName	cisbp__M1952	4.02	0.0817		eve (inferredBy_MotifSimilarity).E5; ems (inferredBy_MotifSimilarity_n_Orthology).	3	126	CG9168;CR43825;CR45231
geneListName	elemento__ATTTTAA	4.01	0.0815			7	1014	CG6690;CG9168;CR44501;CR45231;Obp22a;Sfp24Bc;Sfp65A
geneListName	flyfactorsurvey__Odsh_Cell_FBgn0026058	4	0.0814	OdsH (directAnnotation).	Awh; CG9876; E5; Pph13; Rx; al; ems; en; eve; exex; inv; lbe; lms; otp; ro; unpg (inferredBy_MotifSimilarity).CG34367; Lim3; PHDP; unc-4; zen (inferredBy_MotifSimilarity_n_Orthology).	11	2942	CG10651;CG43938;CG6690;CG9168;CR43825;CR45231;lectin-21Ca;Obp22a;Sfp24Bc;Sfp65A;sphinx2
geneListName	hdpi__RFXANK	3.98	0.081	CG5846 (inferredBy_Orthology).		6	1318	CG43938;CG9168;CR43825;CR44501;CR45231;Sfp65A
geneListName	transfac_pro__M06665	3.97	0.0809			4	500	CG9168;CR43825;Sfp65A;sphinx2
geneListName	hdpi__PHOX2A	3.97	0.0808	PHDP (inferredBy_Orthology).		3	126	CG9168;CR43825;CR45231
geneListName	predrem__nrMotif857	3.95	0.0806			7	1318	CG6690;CG9168;CR44501;CR45231;Obp22a;Sfp24Bc;Sfp65A
geneListName	cisbp__M5847	3.93	0.0803	Sox100B (inferredBy_Orthology).	D; Sox15; Sox21a; Sox21b (inferredBy_MotifSimilarity_n_Orthology).	3	229	CG9168;CR44501;Obp22a
geneListName	cisbp__M5811	3.92	0.0801	Sox100B (inferredBy_Orthology).	D; Sox15; Sox21a; Sox21b (inferredBy_MotifSimilarity_n_Orthology).	3	229	CG9168;CR44501;Obp22a
geneListName	hocomoco__TBX20_HUMAN.H10MO.D	3.91	0.0798	H15; mid (inferredBy_Orthology).	org-1 (inferredBy_MotifSimilarity).bi (inferredBy_MotifSimilarity_n_Orthology).	3	142	CG9168;Sfp24F;sphinx2
geneListName	swissregulon__hs__TFAP4.p2	3.91	0.0798	crp (inferredBy_Orthology).		3	126	CG9168;CR43825;Sfp24Bc
geneListName	hdpi__PLAGL1	3.9	0.0797			12	3999	CG10651;CG18301;CG34447;CG43938;CG6690;CG9168;CR43825;CR45231;lectin-21Ca;Sfp24Bc;Sfp65A;sphinx2
geneListName	elemento__CAATTAG	3.9	0.0797			6	1318	CG43938;CG9168;CR43825;CR45231;Sfp24Ba;Sfp65A
geneListName	swissregulon__hs__NANOG.p2	3.89	0.0795		Ubx; lms (inferredBy_MotifSimilarity).Dr; en; inv (inferredBy_MotifSimilarity_n_Orthology).	7	1318	CG43938;CG6690;CG9168;CR45231;Sfp24Ba;Sfp65A;sphinx2
geneListName	neph__UW.Motif.0060	3.88	0.0794			3	126	CG43938;CR44501;Sfp24Ba
geneListName	cisbp__M5808	3.87	0.0792	Smox (inferredBy_Orthology).		4	433	CG43938;CR43825;CR44501;Obp22a
geneListName	elemento__TAATTGC	3.85	0.0788			6	1014	CG43938;CG9168;CR45231;Sfp24Ba;Sfp24Bc;sphinx2
geneListName	predrem__nrMotif2331	3.83	0.0786			4	451	CG6690;CR44501;lectin-30A;sphinx2
geneListName	cisbp__M5838	3.83	0.0786	Sox100B (inferredBy_Orthology).	D; Sox15; Sox21a; Sox21b (inferredBy_MotifSimilarity_n_Orthology).	2	27	CG9168;CR44501
geneListName	predrem__nrMotif2612	3.81	0.0782			3	229	CG6690;Sfp24Bc;Sfp24F
geneListName	jaspar__MA0973.1	3.79	0.0779			4	618	CG43938;CG9168;Sfp65A;sphinx2
geneListName	transfac_pro__M04937	3.77	0.0777			3	178	CG10651;CR44501;Sfp65A
geneListName	transfac_pro__M06742	3.76	0.0775			3	190	CG6690;CR43825;CR44501
geneListName	cisbp__M0653	3.74	0.0771			6	1555	CG43938;CG9168;CR43825;Sfp24F;Sfp65A;sphinx2
geneListName	tfdimers__MD00346	3.73	0.0769	CG7786; Pdp1; gt; ind (inferredBy_Orthology).		4	591	CG10651;CG43938;CG9168;lectin-21Ca
geneListName	transfac_pro__M06230	3.7	0.0764			3	229	CG6690;CG9168;sphinx2
geneListName	taipale__FOXB1_DBD_WRWGTMAAYAN_repr	3.69	0.0763	fd96Ca; fd96Cb (inferredBy_Orthology).	fkh (inferredBy_MotifSimilarity).croc; fd59A (inferredBy_MotifSimilarity_n_Orthology).	3	184	CG9168;CR43825;CR44501
geneListName	hdpi__SUCLG1	3.68	0.0761	CG6255; Scsalpha (inferredBy_Orthology).		5	670	CG6690;CR43825;CR45231;Sfp24Bc;Sfp65A
geneListName	transfac_pro__M02032	3.67	0.0759			4	538	CG43938;CG9168;CR44501;Sfp65A
geneListName	tfdimers__MD00394	3.66	0.0758	cad (inferredBy_Orthology).		5	945	CG43938;CG6690;CR43825;CR45231;Sfp24Bc
geneListName	neph__UW.Motif.0033	3.65	0.0756			3	367	CR44501;Sfp24Bc;Sfp65A
geneListName	hdpi__KLF3	3.65	0.0755	CG42741 (inferredBy_Orthology).		5	811	CG43938;CG6690;CR45231;Sfp24Ba;Sfp24Bc
geneListName	taipale__SMAD3_DBD_YGTCTAGACA_repr	3.63	0.0753	Smox (inferredBy_Orthology).		4	591	CG43938;CR43825;CR44501;Obp22a
geneListName	transfac_pro__M07386	3.62	0.0752	CG4328; Lmx1a (inferredBy_Orthology).		14	4773	CG10651;CG18301;CG34447;CG43938;CG6690;CG9168;CR43825;CR44501;CR45231;lectin-21Ca;Obp22a;Sfp24Ba;Sfp24Bc;Sfp65A
geneListName	cisbp__M1539	3.62	0.0751		Rfx (inferredBy_MotifSimilarity).CG5846; CG9727; Max; SREBP (inferredBy_MotifSimilarity_n_Orthology).	3	179	CG6690;lectin-21Ca;Sfp65A
geneListName	elemento__TCCTGCA	3.62	0.0751			6	1318	CG6690;CR44501;Sfp24Bc;Sfp65A;Sfp77F;sphinx2
geneListName	neph__UW.Motif.0178	3.61	0.075			3	229	CR43825;Sfp24Ba;Sfp24Bc
geneListName	cisbp__M0435	3.61	0.0749			4	463	CG9168;CR43825;Sfp24Bc;Sfp65A
geneListName	taipale__EN1_DBD_TAATTRSNYAATTA_repr	3.61	0.0749	en; inv (inferredBy_Orthology).	CG9876; Dr; bsh (inferredBy_MotifSimilarity).CG34367; E5; ems; gsb; gsb-n; prd; ro; unpg (inferredBy_MotifSimilarity_n_Orthology).	6	1077	CG10651;CG18301;CG43938;CG6690;CR43825;lectin-21Ca
geneListName	cisbp__M5437	3.59	0.0746	fd96Ca; fd96Cb (inferredBy_Orthology).	fkh (inferredBy_MotifSimilarity).croc; fd59A (inferredBy_MotifSimilarity_n_Orthology).	3	229	CG9168;CR43825;CR44501
geneListName	transfac_pro__M07321	3.58	0.0745	Hnf4 (inferredBy_Orthology).	usp (inferredBy_MotifSimilarity).EcR; Hr78; svp (inferredBy_MotifSimilarity_n_Orthology).	3	184	CG9168;CR45231;Sfp65A
geneListName	jaspar__MA0544.1	3.57	0.0742			3	303	CG9168;CR44501;Sfp24Bc
geneListName	cisbp__M0574	3.56	0.0741			2	45	CG6690;Sfp65A
geneListName	stark__CASGTAR	3.55	0.0739	sim (directAnnotation).		3	189	Acp26Ab;CG10651;Sfp24F
geneListName	predrem__nrMotif4	3.55	0.0739			3	303	CG9168;Sfp24Bc;Sfp65A
geneListName	neph__UW.Motif.0596	3.55	0.0739			3	229	CG9168;lectin-21Ca;Obp22a
geneListName	cisbp__M1050	3.54	0.0738	exd (inferredBy_Orthology).		3	238	CG6690;CG9168;Sfp65A
geneListName	jaspar__MA1089.1	3.53	0.0736			6	1555	CG6690;CG9168;CR43825;CR44501;Sfp65A;sphinx2
geneListName	flyfactorsurvey__chinmo_SOLEXA_FBgn0086758	3.53	0.0736	chinmo (directAnnotation).		3	367	CG6690;Sfp24Ba;Sfp24Bc
geneListName	predrem__nrMotif2424	3.51	0.0734			5	522	CG6690;CR43825;lectin-21Ca;Sfp24Ba;Sfp65A
geneListName	hdpi__DUSP26	3.51	0.0732	CG7378 (inferredBy_Orthology).		3	229	CG43938;CR44501;CR45231
geneListName	swissregulon__sacCer__MBP1	3.51	0.0732			4	522	CG6690;CR44501;CR45231;Sfp24F
geneListName	transfac_pro__M00408	3.5	0.0732			3	229	CG6690;CR44501;Sfp24Bc
geneListName	cisbp__M1870	3.49	0.073			3	238	CR44501;Sfp65A;sphinx2
geneListName	cisbp__M4787	3.49	0.0729	byn (directAnnotation).		7	1481	CG10651;CG6690;CG9168;CR43825;Sfp24Ba;Sfp24F;Sfp65A
geneListName	predrem__nrMotif2514	3.49	0.0729			4	618	CG6690;CR43825;Sfp24Bc;Sfp65A
geneListName	hdpi__C19orf25	3.48	0.0728			10	2942	CG43938;CG6690;CG9168;CR43825;CR44501;CR45231;Obp22a;Sfp24F;Sfp65A;sphinx2
geneListName	hdpi__GLYCTK	3.48	0.0727	CG9886 (inferredBy_Orthology).		4	487	CG6690;CR45231;Sfp24Ba;Sfp24Bc
geneListName	predrem__nrMotif1259	3.47	0.0726			2	29	CG9168;Sfp65A
geneListName	tfdimers__MD00262	3.47	0.0726	HLH3B; HLH4C; Hand; Max; Mitf; Myc; Usf; ac; ase; l(1)sc; nau; sc (inferredBy_Orthology).		13	4999	CG11977;CG6690;CG9168;CR43825;CR44501;CR45231;Obp22a;Sfp24Ba;Sfp24Bc;Sfp24F;Sfp65A;Sfp77F;sphinx2
geneListName	homer__AAATTSAATTTN_CES-1	3.47	0.0726			3	229	CR43825;Sfp24Ba;Sfp24Bc
geneListName	cisbp__M1206	3.47	0.0726			3	229	CR44501;Sfp65A;sphinx2
geneListName	cisbp__M1680	3.47	0.0726			3	303	CR44501;Sfp65A;sphinx2
geneListName	flyfactorsurvey__cad_FlyReg_FBgn0000251	3.46	0.0725	cad (directAnnotation).		4	459	CG43938;CR44501;Sfp24F;Sfp65A
geneListName	cisbp__M5391	3.46	0.0725	en; inv (inferredBy_Orthology).	CG9876; Dr; bsh (inferredBy_MotifSimilarity).CG34367; E5; ems; gsb; gsb-n; prd; ro; unpg (inferredBy_MotifSimilarity_n_Orthology).	6	1137	CG10651;CG18301;CG43938;CG6690;CR43825;lectin-21Ca
geneListName	cisbp__M1683	3.46	0.0725			3	303	CR44501;Sfp65A;sphinx2
geneListName	predrem__nrMotif2241	3.46	0.0725			3	303	CR45231;Obp22a;Sfp77F
geneListName	transfac_pro__M02895	3.45	0.0722	usp (inferredBy_Orthology).		8	1958	CG10651;CG43938;CG9168;CR43825;CR45231;Sfp24F;Sfp65A;sphinx2
geneListName	elemento__TGACCTC	3.44	0.0721			2	56	CG9168;Sfp65A
geneListName	taipale__SOX9_full_NATGAATKNYAGTCATN	3.44	0.0721	Sox100B (inferredBy_Orthology).	Sox15 (inferredBy_MotifSimilarity_n_Orthology).	3	229	lectin-30A;Obp22a;Sfp24Bc
geneListName	cisbp__M0096	3.43	0.072			3	303	Sfp24Bc;Sfp65A;sphinx2
geneListName	predrem__nrMotif852	3.43	0.072			3	303	CR44501;Sfp24F;Sfp65A
geneListName	jaspar__MA0038.1	3.43	0.072			6	1555	CG6690;CG9168;CR43825;CR44501;Sfp65A;sphinx2
geneListName	predrem__nrMotif2392	3.42	0.0718			3	367	Acp26Ab;Sfp24Bc;Sfp65A
geneListName	taipale__SOX8_DBD_AACAATRTKCAGWGTT	3.42	0.0718	Sox100B (inferredBy_Orthology).	D; Sox15; Sox21a; Sox21b (inferredBy_MotifSimilarity_n_Orthology).	3	303	CG9168;CR44501;Obp22a
geneListName	cisbp__M1611	3.41	0.0717		pan (inferredBy_MotifSimilarity_n_Orthology).	7	1958	CG43938;CG9168;CR43825;CR44501;CR45231;Sfp24F;Sfp65A
geneListName	transfac_pro__M06308	3.39	0.0713			4	648	CR44345;CR44501;Sfp65A;sphinx2
geneListName	transfac_pro__M02028	3.37	0.071	exd (inferredBy_Orthology).		4	618	CG43350;CG6690;CG9168;CR44501
geneListName	taipale__UNCX_DBD_NTAATYTAATTAN	3.37	0.0709	unc-4 (inferredBy_Orthology).	CG11294; CG32532; CG34367; CG9876; Drgx; Lim3; OdsH; Optix; Rx; al; bsh (inferredBy_MotifSimilarity).PHDP; Traf4; eve (inferredBy_MotifSimilarity_n_Orthology).	2	67	CR43825;Sfp24Bc
geneListName	homer__NTAATTDGCYAATTANNWWD_Pax7	3.37	0.0709	gsb; gsb-n; prd (inferredBy_Orthology).	CG9876; bsh (inferredBy_MotifSimilarity).CG34367; E5; Rx; ems; en; inv; pdm3; ro (inferredBy_MotifSimilarity_n_Orthology).	9	1785	CG10651;CG18301;CG6690;CG9168;CR43825;CR45231;lectin-21Ca;Sfp24Ba;Sfp24Bc
geneListName	cisbp__M5941	3.36	0.0709	unc-4 (inferredBy_Orthology).	CG11294; CG32532; CG34367; CG9876; Drgx; OdsH; Optix; PHDP; Rx; al; bsh (inferredBy_MotifSimilarity).Lim3; Traf4; eve (inferredBy_MotifSimilarity_n_Orthology).	3	402	CR43825;Sfp24Ba;Sfp24Bc
geneListName	cisbp__M2045	3.36	0.0708	pan (directAnnotation).		3	303	CR44501;Sfp24Bc;Sfp65A
geneListName	cisbp__M0253	3.35	0.0706		dpn; h (inferredBy_MotifSimilarity).Sidpn (inferredBy_MotifSimilarity_n_Orthology).	3	303	CR45231;Sfp24F;sphinx2
geneListName	taipale__MEOX2_DBD_NTMATCATCATTAN_repr	3.34	0.0706	btn (inferredBy_Orthology).		4	706	CG9168;Sfp24F;Sfp65A;sphinx2
geneListName	cisbp__M5826	3.34	0.0706	D; Sox21a; Sox21b (inferredBy_Orthology).	Sox100B; Sox15 (inferredBy_MotifSimilarity_n_Orthology).	3	395	CG6690;CG9168;CR44501
geneListName	taipale_tf_pairs__ERF_DLX3_RSCGGAANNNNNYAATTA_CAP	3.34	0.0705			3	303	CG9168;CR43825;Sfp65A
geneListName	predrem__nrMotif238	3.34	0.0705			4	531	CG6690;CG9168;CR43825;Sfp65A
geneListName	tfdimers__MD00232	3.34	0.0705	Taf7; Tbp (inferredBy_Orthology).		3	379	CG6690;CG9168;CR43825
geneListName	cisbp__M1529	3.34	0.0704		CG9727; Rfx (inferredBy_MotifSimilarity_n_Orthology).	3	229	CG6690;lectin-21Ca;Sfp65A
geneListName	hocomoco__THAP1_HUMAN.H10MO.D	3.33	0.0704	CG10431 (inferredBy_Orthology).	pho (inferredBy_MotifSimilarity_n_Orthology).	3	229	CG6690;Sfp65A;sphinx2
geneListName	taipale_tf_pairs__E2F3_ONECUT2_NNSGCGCSNNNNATCGAYN_CAP_repr	3.32	0.0702	E2f1; onecut (inferredBy_Orthology).		3	229	CR44501;Sfp24Ba;Sfp65A
geneListName	elemento__TAATTGCA	3.32	0.0701			10	3128	CG43938;CG6690;CG9168;CR43825;CR45231;Obp22a;Sfp24Ba;Sfp24Bc;Sfp77F;sphinx2
geneListName	hdpi__SNRP70	3.31	0.07	snRNP-U1-70K (inferredBy_Orthology).		3	374	CR45231;Sfp24Bc;sphinx2
geneListName	transfac_pro__M00770	3.31	0.07			4	515	CG6690;lectin-21Ca;Sfp24Bc;Sfp65A
geneListName	hdpi__RFC3	3.31	0.0699	RfC38 (inferredBy_Orthology).		14	4882	CG10651;CG43938;CG6690;CG9168;CR43825;CR44501;CR45231;lectin-30A;Obp22a;Sfp24Ba;Sfp24Bc;Sfp65A;Sfp77F;sphinx2
geneListName	cisbp__M2337	3.31	0.0699			3	379	CG9168;CR44501;Sfp24Bc
geneListName	cisbp__M0169	3.31	0.0699			3	303	CR44501;CR45231;Sfp65A
geneListName	cisbp__M2007	3.3	0.0698	OdsH (directAnnotation).	Awh; CG9876; E5; Pph13; Rx; al; ems; en; eve; exex; inv; lbe; lms; otp; ro; unpg (inferredBy_MotifSimilarity).CG34367; Lim3; PHDP; unc-4; zen (inferredBy_MotifSimilarity_n_Orthology).	12	3620	CG10651;CG43938;CG6690;CG9168;CR43825;CR45231;lectin-21Ca;lectin-30A;Obp22a;Sfp24Bc;Sfp65A;sphinx2
geneListName	tfdimers__MD00174	3.3	0.0697	Stat92E (inferredBy_Orthology).		3	229	CG10651;CG6690;CR44501
geneListName	tfdimers__MD00387	3.29	0.0697	oc (inferredBy_Orthology).		3	367	CG6690;Obp22a;Sfp65A
geneListName	transfac_pro__M06013	3.29	0.0697			3	238	CG10651;CR44501;CR45231
geneListName	tfdimers__MD00270	3.28	0.0695			2	126	CR45231;Sfp24Bc
geneListName	transfac_pro__M06169	3.27	0.0694			3	367	CG6690;CR45231;Sfp65A
geneListName	hdpi__TFAP2C	3.26	0.0692	TfAP-2 (inferredBy_Orthology).		3	238	CR45231;Sfp24Ba;Sfp24Bc
geneListName	jaspar__MA0237.2	3.26	0.0692	pan (directAnnotation).		3	303	CR44501;Sfp24Bc;Sfp65A
geneListName	cisbp__M6294	3.26	0.0691	Abd-B (inferredBy_Orthology).	hth (inferredBy_MotifSimilarity_n_Orthology).	11	3620	Acp26Ab;CG18301;CG6690;CG9168;CR43825;CR44501;lectin-21Ca;Obp22a;Sfp65A;Sfp77F;sphinx2
geneListName	taipale_tf_pairs__CUX1_FOXO6_RTAAACANNNNNATCRATN_CAP	3.25	0.069	foxo (inferredBy_Orthology).		3	303	CR44501;Sfp24Bc;sphinx2
geneListName	neph__UW.Motif.0070	3.25	0.069			6	1137	CG9168;CR45231;Sfp24Ba;Sfp24Bc;Sfp65A;sphinx2
geneListName	hocomoco__HNF4A_HUMAN.H10MO.A	3.24	0.0689	Hnf4 (inferredBy_Orthology).	svp (inferredBy_MotifSimilarity_n_Orthology).	3	303	CG43938;CG9168;Sfp65A
geneListName	cisbp__M1526	3.24	0.0689		CG9727; Rfx (inferredBy_MotifSimilarity_n_Orthology).	3	303	CG6690;lectin-21Ca;Sfp65A
geneListName	transfac_pro__M05017	3.24	0.0689			7	1555	CG6690;CG9168;CR43825;CR44501;CR45231;Sfp65A;sphinx2
geneListName	neph__UW.Motif.0483	3.24	0.0689			4	618	CG9168;CR43825;Sfp24Bc;Sfp65A
geneListName	hdpi__MAPK1	3.24	0.0689	rl (inferredBy_Orthology).		3	303	CG9168;CR45231;Sfp65A
geneListName	predrem__nrMotif2523	3.24	0.0689			3	303	CG6690;CR44501;Sfp24Bc
geneListName	transfac_pro__M05443	3.24	0.0688		byn; org-1 (inferredBy_MotifSimilarity).H15; bi; mid (inferredBy_MotifSimilarity_n_Orthology).	5	836	CG10651;CG6690;CG9168;CR44501;Sfp65A
geneListName	taipale__PHOX2B_DBD_TAATYYAATTA	3.24	0.0688	PHDP (inferredBy_Orthology).	CG11294; CG32532; CG34367; CG9876; Drgx; OdsH; Optix; al; bsh; hbn; unc-4 (inferredBy_MotifSimilarity).Lim3; Rx; Traf4 (inferredBy_MotifSimilarity_n_Orthology).	3	367	CR43825;Sfp24Ba;Sfp24Bc
geneListName	hdpi__NKX2-3	3.23	0.0686			2	71	CR43825;Sfp24Bc
geneListName	transfac_pro__M06254	3.21	0.0683			3	367	CG9168;Sfp24Ba;sphinx2
geneListName	hocomoco__OLIG2_MOUSE.H10MO.B	3.2	0.0681	Oli (inferredBy_Orthology).	HLH3B (inferredBy_MotifSimilarity_n_Orthology).	5	1077	CG43938;CG9168;CR43825;Sfp65A;sphinx2
geneListName	predrem__nrMotif2006	3.2	0.0681		bin (inferredBy_MotifSimilarity_n_Orthology).	3	303	Obp22a;Sfp65A;Sfp77F
geneListName	elemento__AATTTTA	3.19	0.0681			2	126	CR44501;Sfp24Bc
geneListName	tfdimers__MD00318	3.19	0.068	Hnf4; svp (inferredBy_Orthology).		3	303	CG9168;CR44501;Sfp65A
geneListName	predrem__nrMotif1874	3.19	0.068			2	126	CR45231;Sfp65A
geneListName	transfac_pro__M02033	3.18	0.0679	pan (inferredBy_Orthology).		3	451	CG9168;CR44501;CR45231
geneListName	taipale__SOX21_DBD_AACAATNNNNAKTGTT	3.18	0.0679	D; Sox21a; Sox21b (inferredBy_Orthology).	Sox100B; Sox15 (inferredBy_MotifSimilarity_n_Orthology).	3	367	CG6690;CG9168;CR44501
geneListName	cisbp__M3016	3.18	0.0678			3	303	CG6690;Sfp65A;sphinx2
geneListName	cisbp__M5626	3.18	0.0678	btn (inferredBy_Orthology).		4	706	CG9168;Sfp24F;Sfp65A;sphinx2
geneListName	jaspar__MA1079.1	3.17	0.0677			3	303	CR44501;Sfp65A;sphinx2
geneListName	transfac_public__M00171	3.17	0.0677	Adf1 (directAnnotation).		4	623	CG6690;CG9168;CR43825;Sfp65A
geneListName	cisbp__M5715	3.16	0.0676	PHDP (inferredBy_Orthology).	CG11294; CG32532; CG34367; CG9876; Drgx; OdsH; Optix; al; bsh; hbn; unc-4 (inferredBy_MotifSimilarity).Lim3; Rx; Traf4 (inferredBy_MotifSimilarity_n_Orthology).	3	377	CR43825;Sfp24Ba;Sfp24Bc
geneListName	transfac_pro__M01082	3.16	0.0675	Usf (inferredBy_Orthology).		3	303	CG6690;CG9168;Sfp65A
geneListName	cisbp__M6514	3.16	0.0675	gem (inferredBy_Orthology).		3	379	CG43938;CR43825;Sfp24Bc
geneListName	cisbp__M4747	3.15	0.0674		Atf-2; Atf3; Atf6; CG44247; CrebA; CrebB; Jra; crc; kay (inferredBy_MotifSimilarity).Xbp1 (inferredBy_MotifSimilarity_n_Orthology).	3	303	CG10651;CG9168;sphinx2
geneListName	cisbp__M1585	3.14	0.0672	pan (inferredBy_Orthology).		5	1137	CG6690;CG9168;CR45231;Sfp65A;Sfp77F
geneListName	predrem__nrMotif972	3.13	0.0669			3	367	CR44501;Sfp65A;sphinx2
geneListName	cisbp__M5581	3.12	0.0669	mirr (inferredBy_Orthology).		3	367	CR44501;lectin-21Ca;Sfp24Bc
geneListName	predrem__nrMotif982	3.11	0.0667			4	591	CR45231;lectin-30A;Sfp24Bc;Sfp65A
geneListName	predrem__nrMotif332	3.11	0.0667			5	945	CG9168;CR43825;Sfp24Bc;Sfp65A;sphinx2
geneListName	taipale__IRX2_DBD_NWACAYRACAWN_repr	3.11	0.0666	mirr (inferredBy_Orthology).		3	367	CR44501;lectin-21Ca;Sfp24Bc
geneListName	hdpi__SPAG7	3.1	0.0666	CG2608 (inferredBy_Orthology).		3	406	CR44501;Sfp65A;sphinx2
geneListName	transfac_pro__M02931	3.1	0.0665	CG12071 (inferredBy_Orthology).		4	663	CG33502;CR44501;CR45231;Sfp65A
geneListName	hdpi__UTP18	3.1	0.0665	wcd (inferredBy_Orthology).		11	3263	CG43938;CG6690;CG9168;CR43825;CR45231;lectin-21Ca;Sfp24Ba;Sfp24Bc;Sfp65A;Sfp77F;sphinx2
geneListName	cisbp__M4736	3.09	0.0664	Antp (directAnnotation).	C15; CG18599; Scr; bsh; btn; ems; ftz; pb; zen2 (inferredBy_MotifSimilarity).	2	126	CG6690;sphinx2
geneListName	cisbp__M2031	3.09	0.0663	exd (directAnnotation).		3	318	CG6690;CR43825;CR44501
geneListName	cisbp__M1686	3.08	0.0663			3	303	CR44501;Sfp65A;sphinx2
geneListName	hdpi__GIT2	3.07	0.066	Git (inferredBy_Orthology).		11	3620	CG43938;CG6690;CG9168;CR43825;CR44501;CR45231;lectin-30A;Sfp24Ba;Sfp24Bc;Sfp65A;Sfp77F
geneListName	flyfactorsurvey__Xrp1_CG6272_SANGER_5_FBgn0036126	3.07	0.066	CG6272 (directAnnotation).	Xrp1; slbo (inferredBy_MotifSimilarity).	3	303	CG43938;CG6690;lectin-21Ca
geneListName	hocomoco__HXA9_HUMAN.H10MO.D	3.07	0.066	Abd-B (inferredBy_Orthology).	hth (inferredBy_MotifSimilarity_n_Orthology).	10	3263	Acp26Ab;CG18301;CG9168;CR43825;CR44501;lectin-21Ca;Obp22a;Sfp65A;Sfp77F;sphinx2
geneListName	stark__AAASTTT	3.07	0.066			2	126	CG6690;Sfp65A
geneListName	transfac_pro__M05757	3.07	0.066			7	1318	CG10651;CG43350;CG43938;CG6690;CR43825;CR44501;Sfp65A
geneListName	stark__KCAATAAA	3.07	0.066			4	745	CG10651;CR44501;Obp22a;sphinx2
geneListName	taipale__FOXC1_DBD_WRWRTMAAYAW	3.06	0.0659	croc (inferredBy_Orthology).	fd59A; fd96Ca; fkh (inferredBy_MotifSimilarity).eve; fd96Cb (inferredBy_MotifSimilarity_n_Orthology).	3	303	CG9168;CR43825;CR44501
geneListName	transfac_pro__M01903	3.06	0.0659			4	745	CG10651;CR43825;CR45231;Sfp24Bc
geneListName	taipale__CART1_DBD_NTAAYYYAATTAN	3.06	0.0659	Traf4 (inferredBy_Orthology).	CG11294; CG15696; CG32532; CG34367; CG9876; Drgx; Lim1; Lim3; Lmx1a; OdsH; Optix; PHDP; Pph13; Rx; Vsx1; al; ap; bsh; en; hbn; lms; otp; repo; ro; slou; unc-4; unpg (inferredBy_MotifSimilarity).CG4328; eve (inferredBy_MotifSimilarity_n_Orthology).	2	148	CR43825;Sfp24Bc
geneListName	predrem__nrMotif56	3.06	0.0659			2	126	CR45231;Sfp65A
geneListName	hocomoco__ZSC16_HUMAN.H10MO.D	3.05	0.0657			10	3128	CG18301;CG6690;CR43825;CR45231;Obp22a;Sfp24Ba;Sfp24Bc;Sfp24F;Sfp65A;sphinx2
geneListName	jaspar__MA1022.1	3.05	0.0656			3	503	CG43938;CG9168;Sfp65A
geneListName	homer__ADGGYAGYAGCATCT_PRDM9	3.04	0.0656			5	706	CG9168;CR43825;lectin-21Ca;Obp22a;sphinx2
geneListName	predrem__nrMotif1754	3.04	0.0655			6	1318	CG6690;CG9168;lectin-21Ca;Obp22a;Sfp24Ba;Sfp24Bc
geneListName	cisbp__M0663	3.04	0.0655			3	500	CG43938;CG9168;Sfp65A
geneListName	elemento__GCAGGAC	3.04	0.0655			3	406	CG6690;CR44501;Sfp24Bc
geneListName	predrem__nrMotif1692	3.03	0.0653			3	369	CG9168;Sfp24F;Sfp65A
geneListName	transfac_pro__M06311	3.03	0.0653			6	1373	CG6690;CG9168;CR44501;Obp22a;Sfp65A;sphinx2
geneListName	taipale_tf_pairs__HOXA3_EOMES_TAATKAGGTGNKA_CAP_repr	3.02	0.0652	zen (inferredBy_Orthology).		2	126	CG6690;CR43825
geneListName	hdpi__PTCD1	3.01	0.065	CG4611 (inferredBy_Orthology).		3	433	CG9168;CR44501;lectin-21Ca
geneListName	neph__UW.Motif.0110	3.01	0.065			14	4252	CG10651;CG43350;CG43938;CG6690;CG9168;CR43825;CR44501;CR45231;lectin-30A;Sfp24Bc;Sfp24F;Sfp65A;Sfp77F;sphinx2
geneListName	cisbp__M0647	3	0.0649			3	499	CG43938;CG9168;Sfp65A
