# Supplementary material for: Sex-specific transcriptomic responses to changes in the nutritional environment
Source: eLife. 2019 Aug 22;8:e47262. doi: 10.7554/eLife.47262 (PMC6773443; doi:10.7554/eLife.47262)
Supplement: Supplementary file 4. — The table shows male and female fold changes (from high-carbohydrate to high-protein diet) for sets of genes associated with TOR signalling. We used two different methods to identify such genes. Sheets labelled ‘IIS TOR’ contain genes with the Gene Ontology annotations ‘insulin signalling’ or ‘TOR signalling’. Sheet ‘IIS TOR (all)’ shows the overlap between these genes and genes in our dataset (irrespective of significance of differential expression). Sheets ‘IIS TOR (concordant)’ and "IIS TOR (opposing) show genes with sexually concordant and opposing expression responses, respectively (again, irrespectively of significane). Genes in bold show significant expression responses (FDR < 0.05). The sheet ‘REPTOR (all)’ lists genes in our dataset that overlap with the TOR-responsive gene set reported by Tiebe et al. (2015). Again, male and female fold changes are shown, irrespecively of their significance. [file elife-47262-supp4.xlsx]

## Sheet: IIS TOR  (all)
FLYBASE ID	FEMALE FC	MALE FC	SYMBOL	GENENAME
FBgn0029840	-0.0415839	0.07972	raptor	raptor
FBgn0037248	0.115819	0.187934	srl	spargel
FBgn0027492	0.0970114	-0.0261378	wdb	widerborst
FBgn0044047	-0.228994	0.020068	Ilp6	Insulin-like peptide 6
FBgn0262103	0.0139169	0.0617307	Sik3	Salt-inducible kinase 3
FBgn0015279	-0.00219521	-0.0615365	Pi3K92E	Pi3K92E
FBgn0264691	0.0830679	-0.112194	Lst8	Lst8
FBgn0039858	0.0691529	0.162485	CycG	Cyclin G
FBgn0041191	-0.0663579	0.0944701	Rheb	Ras homolog enriched in brain
FBgn0030802	0.0595399	-0.00553686	DENR	Density regulated protein
FBgn0041210	0.0914887	0.0826407	HDAC4	Histone deacetylase 4
FBgn0033935	0.0326486	-0.0357538	Sin1	SAPK-interacting protein 1
FBgn0003256	0.257226	-0.0621641	rl	rolled
FBgn0015509	0.103353	0.0333058	Cul1	Cullin 1
FBgn0038197	0.110068	-0.0160615	foxo	forkhead box, sub-group O
FBgn0021796	0.0418368	-0.0361401	Tor	Target of rapamycin
FBgn0262473	0.0972642	-0.0998218	Tl	Toll
FBgn0003371	0.0311674	0.0646053	sgg	shaggy
FBgn0038279	0.183626	-0.0560783	Sdr	Secreted decoy of InR
FBgn0023001	-0.306128	-0.096215	melt	melted
FBgn0010269	-0.00164962	-0.133444	Dsor1	Downstream of raf1
FBgn0262656	0.215441	0.162216	Myc	Myc
FBgn0266284	-0.0747123	0.135173	Ns3	Nucleostemin 3
FBgn0025637	0.0689061	-0.0301955	SkpA	SKP1-related A
FBgn0025638	-0.0403402	-0.0615066	Roc1a	Regulator of cullins 1a
FBgn0004177	0.2068	-0.0237042	mts	microtubule star
FBgn0086371	-0.110854	0.118361	poly	poly
FBgn0052082	-0.496981	-0.231136	IRSp53	IRSp53
FBgn0003651	-0.323014	-0.0513774	svp	seven up
FBgn0028717	-0.166956	0.103701	Lnk	Lnk
FBgn0028734	0.152501	0.00216134	Fmr1	Fmr1
FBgn0266411	0.0873218	0.0163827	sima	similar
FBgn0001257	0.0391469	-0.409467	ImpL2	Ecdysone-inducible gene L2
FBgn0026317	0.118437	-0.00316895	Tsc1	Tsc1
FBgn0026379	0.197526	0.0108441	Pten	Phosphatase and tensin homolog
FBgn0260439	0.0166681	0.00201799	Pp2A-29B	Protein phosphatase 2A at 29B
FBgn0264075	0.0411055	-0.0342753	tgo	tango
FBgn0010583	0.0927811	-0.019219	dock	dreadlocks
FBgn0020386	0.0317581	0.00144401	Pdk1	Phosphoinositide-dependent kinase 1
FBgn0263593	-0.0286329	0.13981	Lpin	Lipin
FBgn0027052	0.242564	-0.0687711	STUB1	STIP1 homology and U-box containing protein 1
FBgn0028978	-0.0330098	0.264945	trbl	tribbles
FBgn0086779	0.191676	-0.150816	step	steppke
FBgn0042693	0.054315	-0.102492	PP2A-B'	PP2A-B'
FBgn0005198	0.0489686	0.0940497	gig	gigas
FBgn0020622	0.170325	0.00855776	Pi3K21B	Pi3K21B
FBgn0024248	-0.0951639	0.054858	chico	chico
FBgn0031006	0.000980722	-0.00929697	rictor	rapamycin-insensitive companion of Tor
FBgn0283468	0.142153	-0.00448843	slmb	supernumerary limbs
FBgn0283472	0.0868035	0.044142	S6k	Ribosomal protein S6 kinase
FBgn0283499	0.0435747	-0.018522	InR	Insulin-like receptor
FBgn0267487	0.0524991	0.0641609	Ptp61F	Protein tyrosine phosphatase 61F
FBgn0034110	-0.161594	-0.173267	Atg9	Autophagy-related 9
FBgn0260945	0.133163	0.041477	Atg1	Autophagy-related 1
FBgn0004859	-0.0313692	-0.0165611	ci	cubitus interruptus
FBgn0041094	0.376692	-0.035443	scyl	scylla
FBgn0015296	0.0843033	0.0455566	Shc	SHC-adaptor protein
FBgn0027518	0.148861	-0.0283951	Wdr24	WD repeat domain 24
FBgn0024509	0.0257217	-0.0724281	Sec13	Secretory 13
FBgn0011766	0.118861	-0.0103985	E2f1	E2F transcription factor 1
FBgn0031399	-0.189182	0.0339053	mio	missing oocyte
FBgn0030800	0.031326	0.16774	Nprl2	Nitrogen permease regulator-like 2
FBgn0030812	0.0844726	-0.0113578	wcy	wacky
FBgn0030869	0.112035	-0.03712	Socs16D	Suppressor of Cytokine Signaling at 16D
FBgn0039924	0.231696	0.0174142	PIP4K	Phosphatidylinositol 5-phosphate 4-kinase
FBgn0035035	0.133659	0.375574	CG3570	CG3570
FBgn0036932	0.0230553	0.183216	CG14184	uncharacterized protein
FBgn0267824	-0.0373284	-0.0140486	PRAS40	Proline-rich Akt substrate 40 kDa
FBgn0032006	-0.121262	0.0622213	Pvr	PDGF- and VEGF-receptor related
FBgn0003205	0.0604669	0.0517323	Ras85D	Ras oncogene at 85D
FBgn0016120	-0.199391	-0.0947615	ATPsynD	ATP synthase, subunit D
FBgn0016131	-0.146496	0.172805	Cdk4	Cyclin-dependent kinase 4
FBgn0037647	-0.0571258	0.0630453	RagA-B	Ras-related GTP binding A/B
FBgn0035227	-0.11193	-0.0447473	Iml1	Increased minichromosome loss 1
FBgn0045035	0.103011	-0.0747425	tefu	telomere fusion
FBgn0032202	-0.263119	-0.181655	REPTOR-BP	REPTOR-binding partner
FBgn0026090	0.00222571	0.0316466	CG14812	uncharacterized protein
FBgn0003444	-0.0340223	-0.110595	smo	smoothened
FBgn0015799	0.0871774	-0.0272315	Rbf	Retinoblastoma-family protein
FBgn0032339	-0.0184072	0.00934405	Wdr59	WD repeat domain 59
FBgn0023169	0.00230836	0.110958	AMPKalpha	AMP-activated protein kinase alpha subunit
FBgn0010315	0.258056	0.150698	CycD	Cyclin D
FBgn0034897	0.101995	0.0840335	Sesn	Sestrin
FBgn0025625	-0.636191	-0.13988	Sik2	Salt-inducible kinase 2
FBgn0035469	-0.200432	0.0027334	CG14977	uncharacterized protein
FBgn0263395	0.0124556	0.0637799	hppy	happyhour
FBgn0259678	-0.38717	-0.126487	sqa	spaghetti-squash activator
FBgn0035590	-0.219805	-0.0123604	Prpk	p53-related protein kinase
FBgn0039158	0.208221	-0.287751	CG6182	CG6182
FBgn0036165	0.365576	-0.203439	chrb	charybde
FBgn0039209	-0.018215	-0.0685234	REPTOR	Repressed by TOR
FBgn0032642	0.0710065	0.109651	CG5110	CG5110
FBgn0033247	0.038631	0.135571	Nup44A	Nucleoporin at 44A
FBgn0033272	0.0610535	-0.00388834	RagC-D	Ras-related GTP binding C/D
FBgn0036397	0.0797908	-0.104823	Nprl3	Nitrogen permease regulator-like 3
FBgn0004638	0.150161	-0.0361987	drk	downstream of receptor kinase
FBgn0031094	0.0641307	-0.023352	CG9578	CG9578

## Sheet: IIS TOR (concordant)
FLYBASE	FEMALE FC	MALE FC	SYMBOL	GENENAME
FBgn0015279	-0.00219521	-0.0615365	Pi3K92E	Pi3K92E
FBgn0023001	-0.306128	-0.096215	melt	melted
FBgn0010269	-0.00164962	-0.133444	Dsor1	Downstream of raf1
FBgn0025638	-0.0403402	-0.0615066	Roc1a	Regulator of cullins 1a
FBgn0052082	-0.496981	-0.231136	IRSp53	IRSp53
FBgn0003651	-0.323014	-0.0513774	svp	seven up
FBgn0034110	-0.161594	-0.173267	Atg9	Autophagy-related 9
FBgn0004859	-0.0313692	-0.0165611	ci	cubitus interruptus
FBgn0267824	-0.0373284	-0.0140486	PRAS40	Proline-rich Akt substrate 40 kDa
FBgn0016120	-0.199391	-0.0947615	ATPsynD	ATP synthase, subunit D
FBgn0035227	-0.11193	-0.0447473	Iml1	Increased minichromosome loss 1
FBgn0032202	-0.263119	-0.181655	REPTOR-BP	REPTOR-binding partner
FBgn0003444	-0.0340223	-0.110595	smo	smoothened
FBgn0025625	-0.636191	-0.13988	Sik2	Salt-inducible kinase 2
FBgn0259678	-0.38717	-0.126487	sqa	spaghetti-squash activator
FBgn0035590	-0.219805	-0.0123604	Prpk	p53-related protein kinase
FBgn0039209	-0.018215	-0.0685234	REPTOR	Repressed by TOR
FBgn0037248	0.115819	0.187934	srl	spargel
FBgn0262103	0.0139169	0.0617307	Sik3	Salt-inducible kinase 3
FBgn0039858	0.0691529	0.162485	CycG	Cyclin G
FBgn0041210	0.0914887	0.0826407	HDAC4	Histone deacetylase 4
FBgn0015509	0.103353	0.0333058	Cul1	Cullin 1
FBgn0003371	0.0311674	0.0646053	sgg	shaggy
FBgn0262656	0.215441	0.162216	Myc	Myc
FBgn0028734	0.152501	0.00216134	Fmr1	Fmr1
FBgn0266411	0.0873218	0.0163827	sima	similar
FBgn0026379	0.197526	0.0108441	Pten	Phosphatase and tensin homolog
FBgn0260439	0.0166681	0.00201799	Pp2A-29B	Protein phosphatase 2A at 29B
FBgn0020386	0.0317581	0.00144401	Pdk1	Phosphoinositide-dependent kinase 1
FBgn0005198	0.0489686	0.0940497	gig	gigas
FBgn0020622	0.170325	0.00855776	Pi3K21B	Pi3K21B
FBgn0283472	0.0868035	0.044142	S6k	Ribosomal protein S6 kinase
FBgn0267487	0.0524991	0.0641609	Ptp61F	Protein tyrosine phosphatase 61F
FBgn0260945	0.133163	0.041477	Atg1	Autophagy-related 1
FBgn0015296	0.0843033	0.0455566	Shc	SHC-adaptor protein
FBgn0030800	0.031326	0.16774	Nprl2	Nitrogen permease regulator-like 2
FBgn0039924	0.231696	0.0174142	PIP4K	Phosphatidylinositol 5-phosphate 4-kinase
FBgn0035035	0.133659	0.375574	CG3570	CG3570
FBgn0036932	0.0230553	0.183216	CG14184	uncharacterized protein
FBgn0003205	0.0604669	0.0517323	Ras85D	Ras oncogene at 85D
FBgn0026090	0.00222571	0.0316466	CG14812	uncharacterized protein
FBgn0023169	0.00230836	0.110958	AMPKalpha	AMP-activated protein kinase alpha subunit
FBgn0010315	0.258056	0.150698	CycD	Cyclin D
FBgn0034897	0.101995	0.0840335	Sesn	Sestrin
FBgn0263395	0.0124556	0.0637799	hppy	happyhour
FBgn0032642	0.0710065	0.109651	CG5110	CG5110
FBgn0033247	0.038631	0.135571	Nup44A	Nucleoporin at 44A

## Sheet: IIS TOR (opposing)
FLYBASE ID	FEMALE FC	MALE FC	SYMBOL	GENENAME
FBgn0027492	0.0970114	-0.0261378	wdb	widerborst
FBgn0264691	0.0830679	-0.112194	Lst8	Lst8
FBgn0030802	0.0595399	-0.00553686	DENR	Density regulated protein
FBgn0033935	0.0326486	-0.0357538	Sin1	SAPK-interacting protein 1
FBgn0003256	0.257226	-0.0621641	rl	rolled
FBgn0038197	0.110068	-0.0160615	foxo	forkhead box, sub-group O
FBgn0021796	0.0418368	-0.0361401	Tor	Target of rapamycin
FBgn0262473	0.0972642	-0.0998218	Tl	Toll
FBgn0038279	0.183626	-0.0560783	Sdr	Secreted decoy of InR
FBgn0025637	0.0689061	-0.0301955	SkpA	SKP1-related A
FBgn0004177	0.2068	-0.0237042	mts	microtubule star
FBgn0001257	0.0391469	-0.409467	ImpL2	Ecdysone-inducible gene L2
FBgn0026317	0.118437	-0.00316895	Tsc1	Tsc1
FBgn0264075	0.0411055	-0.0342753	tgo	tango
FBgn0010583	0.0927811	-0.019219	dock	dreadlocks
FBgn0027052	0.242564	-0.0687711	STUB1	STIP1 homology and U-box containing protein 1
FBgn0086779	0.191676	-0.150816	step	steppke
FBgn0042693	0.054315	-0.102492	PP2A-B'	PP2A-B'
FBgn0031006	0.000980722	-0.00929697	rictor	rapamycin-insensitive companion of Tor
FBgn0283468	0.142153	-0.00448843	slmb	supernumerary limbs
FBgn0283499	0.0435747	-0.018522	InR	Insulin-like receptor
FBgn0041094	0.376692	-0.035443	scyl	scylla
FBgn0027518	0.148861	-0.0283951	Wdr24	WD repeat domain 24
FBgn0024509	0.0257217	-0.0724281	Sec13	Secretory 13
FBgn0011766	0.118861	-0.0103985	E2f1	E2F transcription factor 1
FBgn0030812	0.0844726	-0.0113578	wcy	wacky
FBgn0030869	0.112035	-0.03712	Socs16D	Suppressor of Cytokine Signaling at 16D
FBgn0045035	0.103011	-0.0747425	tefu	telomere fusion
FBgn0015799	0.0871774	-0.0272315	Rbf	Retinoblastoma-family protein
FBgn0039158	0.208221	-0.287751	CG6182	CG6182
FBgn0036165	0.365576	-0.203439	chrb	charybde
FBgn0033272	0.0610535	-0.00388834	RagC-D	Ras-related GTP binding C/D
FBgn0036397	0.0797908	-0.104823	Nprl3	Nitrogen permease regulator-like 3
FBgn0004638	0.150161	-0.0361987	drk	downstream of receptor kinase
FBgn0031094	0.0641307	-0.023352	CG9578	CG9578
FBgn0029840	-0.0415839	0.07972	raptor	raptor
FBgn0044047	-0.228994	0.020068	Ilp6	Insulin-like peptide 6
FBgn0041191	-0.0663579	0.0944701	Rheb	Ras homolog enriched in brain
FBgn0266284	-0.0747123	0.135173	Ns3	Nucleostemin 3
FBgn0086371	-0.110854	0.118361	poly	poly
FBgn0028717	-0.166956	0.103701	Lnk	Lnk
FBgn0263593	-0.0286329	0.13981	Lpin	Lipin
FBgn0028978	-0.0330098	0.264945	trbl	tribbles
FBgn0024248	-0.0951639	0.054858	chico	chico
FBgn0031399	-0.189182	0.0339053	mio	missing oocyte
FBgn0032006	-0.121262	0.0622213	Pvr	PDGF- and VEGF-receptor related
FBgn0016131	-0.146496	0.172805	Cdk4	Cyclin-dependent kinase 4
FBgn0037647	-0.0571258	0.0630453	RagA-B	Ras-related GTP binding A/B
FBgn0032339	-0.0184072	0.00934405	Wdr59	WD repeat domain 59
FBgn0035469	-0.200432	0.0027334	CG14977	uncharacterized protein

## Sheet: REPTOR (all)
FLYBASE	FEMALE FC	MALE FC	SYMBOL	GENENAME
FBgn0039760	-1.13335	-0.0978176	CG9682	CG9682
FBgn0039761	-0.700657	-0.477594	CG18404	uncharacterized protein
FBgn0051091	0.864515	0.317561	CG31091	uncharacterized protein
FBgn0035091	1.01804	0.434204	CG3829	CG3829
FBgn0032049	-0.538565	-0.39669	Bace	beta-site APP-cleaving enzyme
FBgn0033980	-0.905832	0.181449	Cyp6a20	Cyp6a20
FBgn0043783	1.90746	0.124381	CG32444	uncharacterized protein
FBgn0035176	1.34808	1.01655	CG13905	uncharacterized protein
FBgn0022359	1.04994	0.515762	Sodh-2	Sorbitol dehydrogenase-2
FBgn0034638	-0.823908	0.0374216	CG10433	uncharacterized protein
FBgn0040959	-1.42814	0.120736	Peritrophin-15a	Peritrophin-15a
FBgn0035343	-0.349663	0.972269	CG16762	uncharacterized protein
FBgn0032382	1.01513	1.16756	Mal-B2	Maltase B2
FBgn0023197	-0.568202	-0.727567	Jon74E	Jonah 74E
FBgn0010357	-0.602956	-0.217079	betaTry	betaTrypsin
FBgn0001187	0.649936	0.080615	Hex-C	Hexokinase C
FBgn0061356	1.04302	0.629433	CG18003	uncharacterized protein
FBgn0259748	-0.727765	-0.457136	CG42397	uncharacterized protein
FBgn0035661	0.550761	0.186568	CG10477	uncharacterized protein
FBgn0035670	-0.83485	-0.0457806	CG10472	uncharacterized protein
FBgn0033216	-0.841599	-0.146553	CG1946	CG1946
FBgn0250757	-0.916968	0.00523529	CG42235	uncharacterized protein
FBgn0038717	-0.791434	-0.145197	CG17751	uncharacterized protein
FBgn0038718	-0.446988	-0.495484	CG17752	uncharacterized protein
FBgn0035718	-1.36966	-0.628784	CG14820	uncharacterized protein
FBgn0030272	-0.650303	-0.201279	CG15201	uncharacterized protein
FBgn0023535	0.429215	0.65286	arg	arginase
FBgn0003961	0.705523	1.0037	Uro	Urate oxidase
FBgn0038820	-0.832512	-0.210736	CG4000	CG4000
FBgn0003996	-0.603256	-0.247223	w	white
FBgn0032820	0.49174	0.494571	fbp	fructose-1,6-bisphosphatase
FBgn0033446	-1.11746	-0.397908	CG1648	CG1648
FBgn0030425	0.784143	0.309109	CG3775	CG3775
FBgn0035985	-0.466765	-0.231798	Cpr67B	Cuticular protein 67B
FBgn0036553	-0.477651	-0.180355	CG17027	uncharacterized protein
