# Supplementary figures and images for: Sex-specific transcriptomic responses to changes in the nutritional environment
Source: eLife journal article supplement (doi:10.7554/elife.47262), 2019-08-22

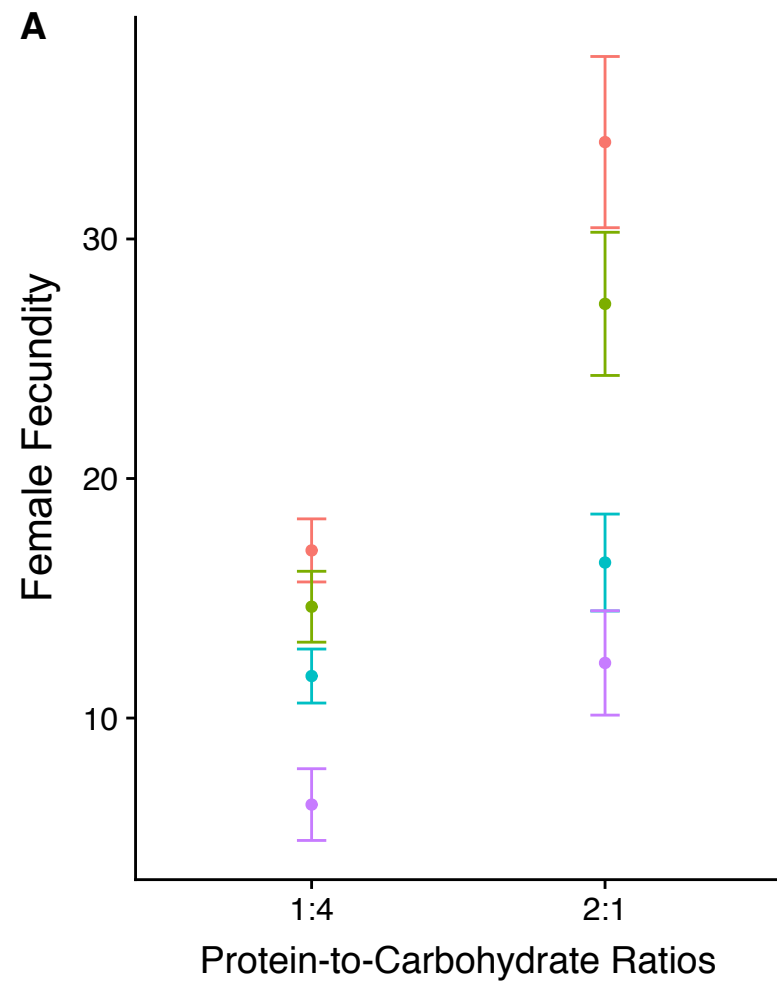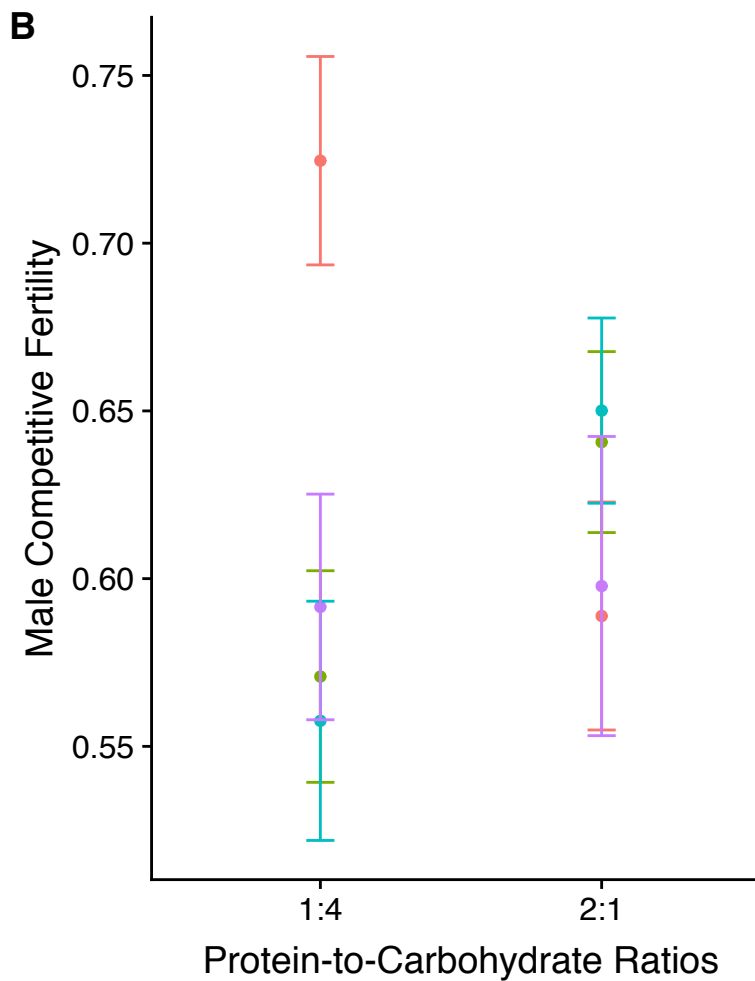

Rapamycin Treatment 0 5 10 50

Supplement: supp [file elife-47262-supp-v1.zip]

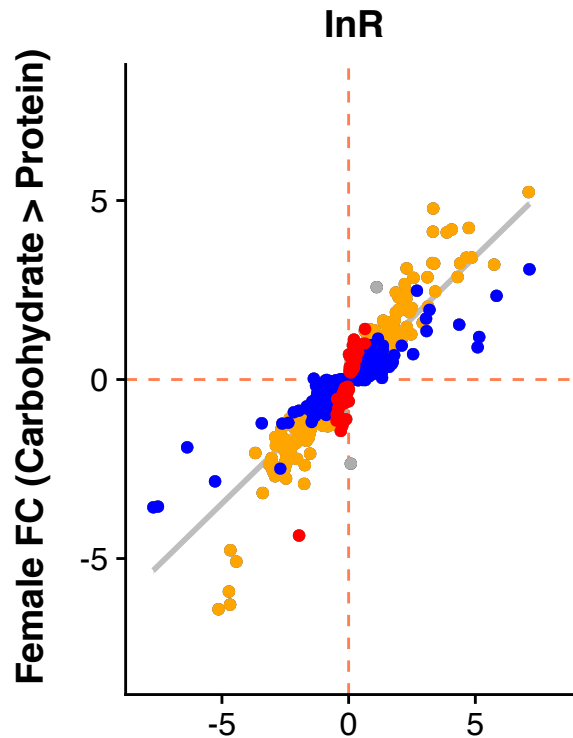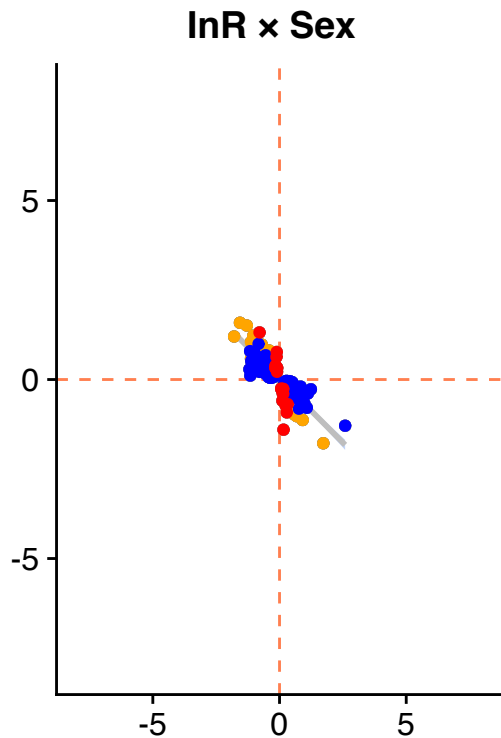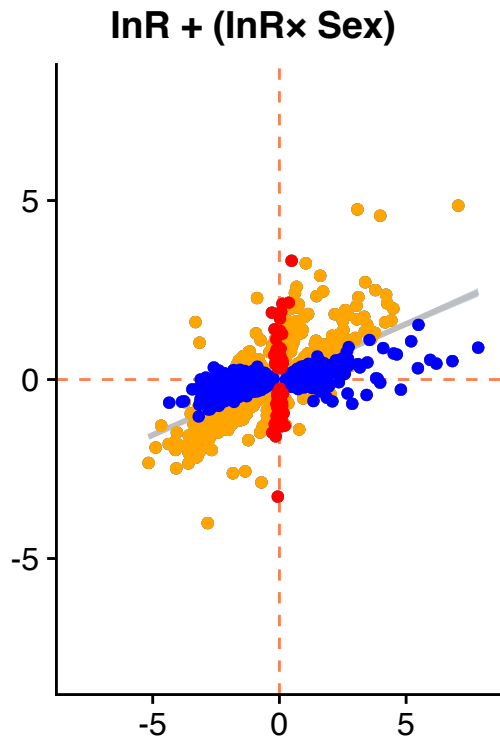

Supplement: supp [file elife-47262-supp-v1.zip]

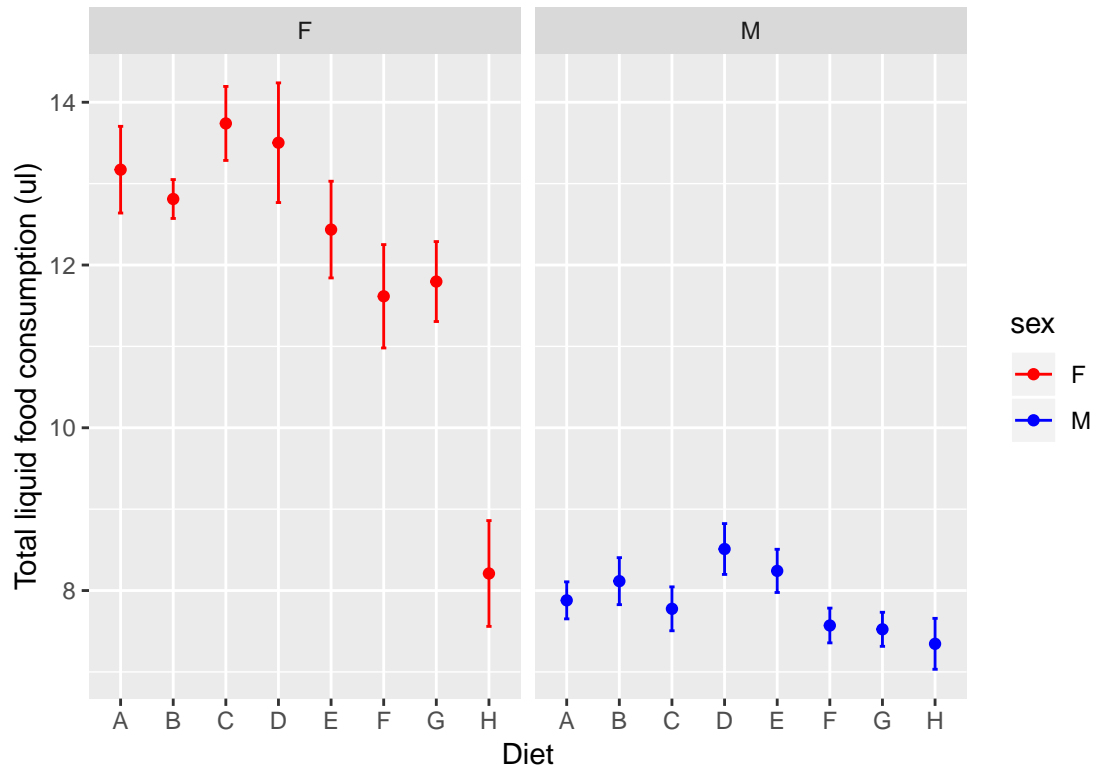

Supplement: supp [file elife-47262-supp-v1.zip]

**A**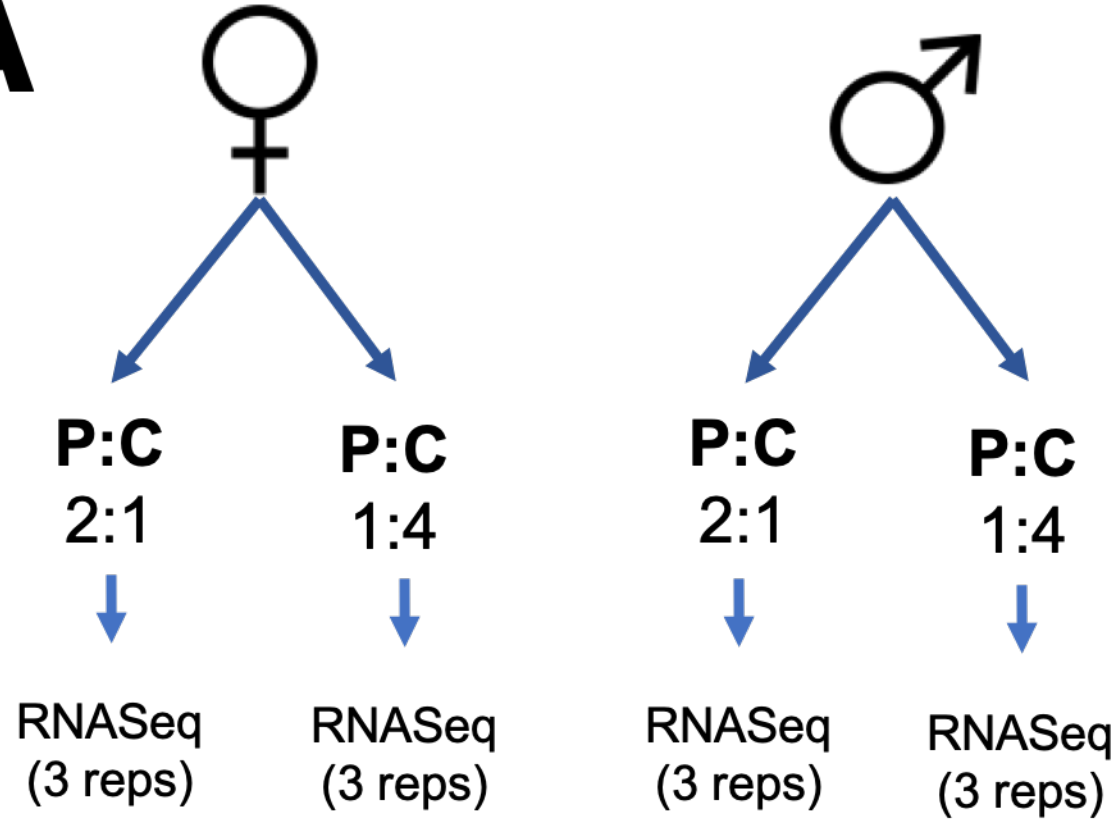**B**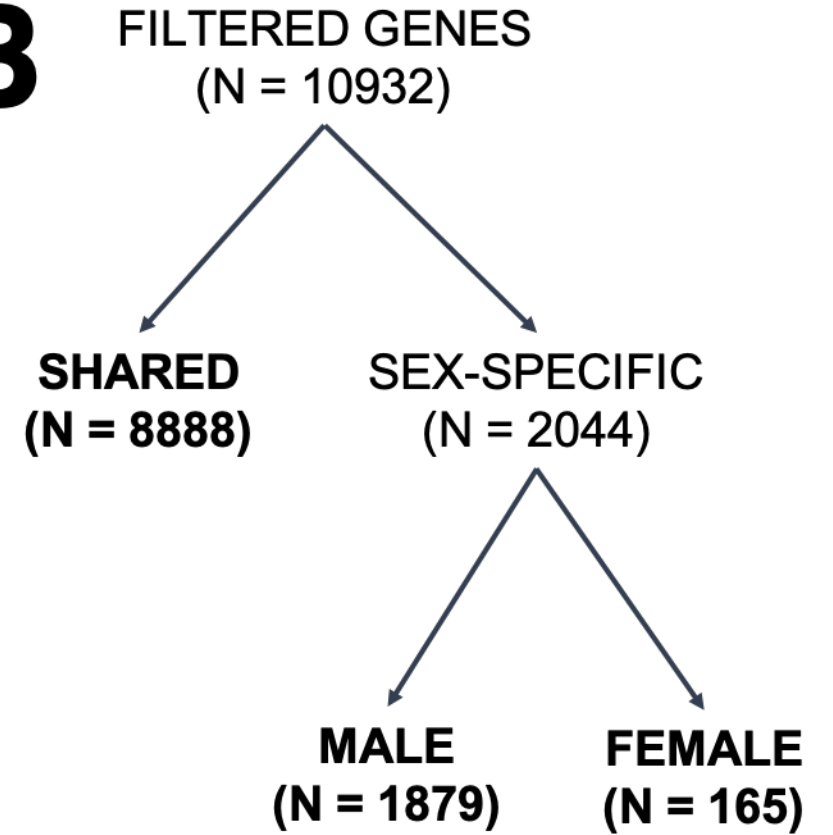

Supplement: supp [file elife-47262-supp-v1.zip]

**A**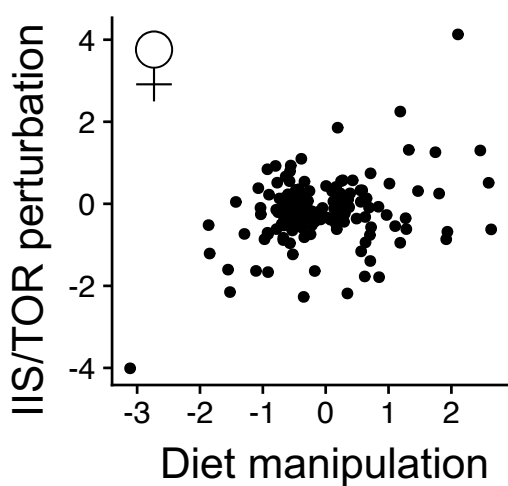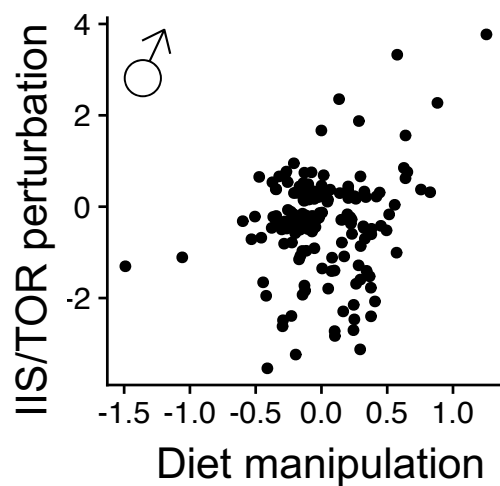**B**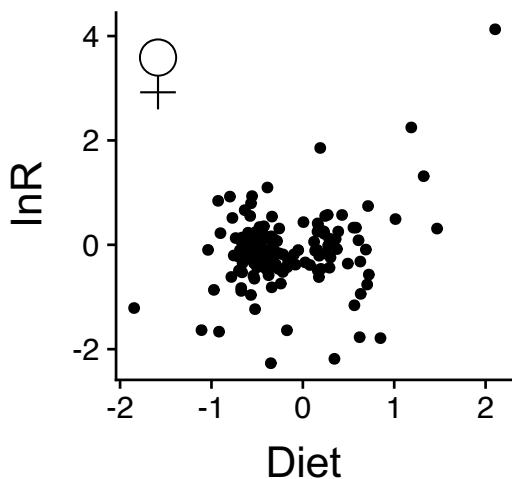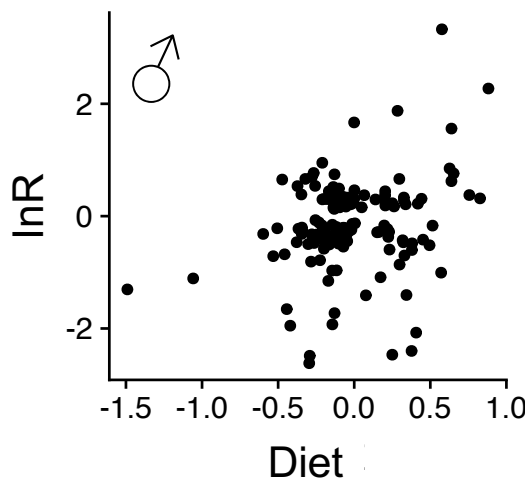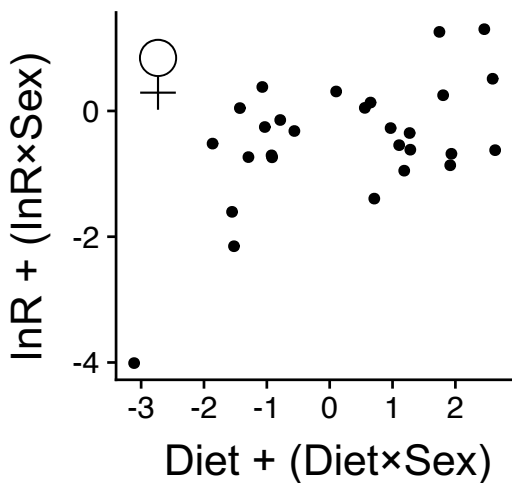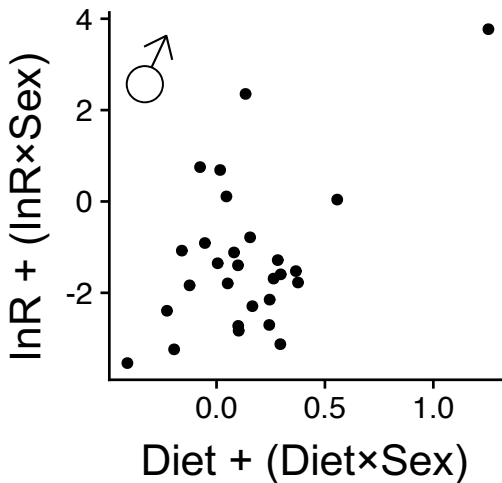

Supplement: supp [file elife-47262-supp-v1.zip]

Male Competitive Fertility

0.7

0.6

A

B

C

D

E

F

G

H

Diet

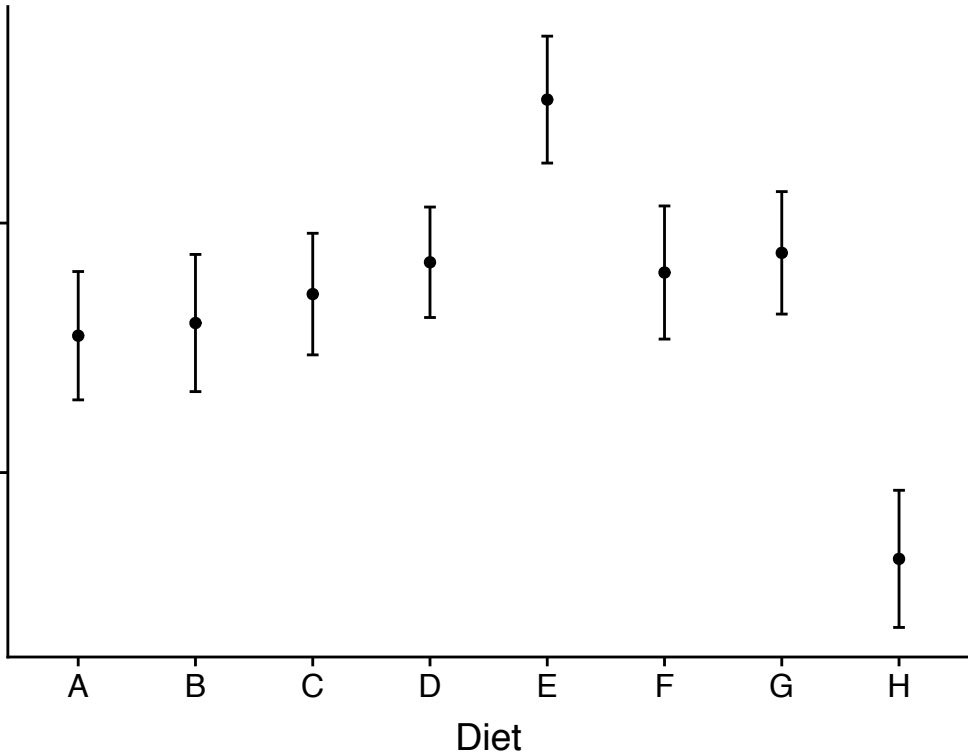

Supplement: supp [file elife-47262-supp-v1.zip]

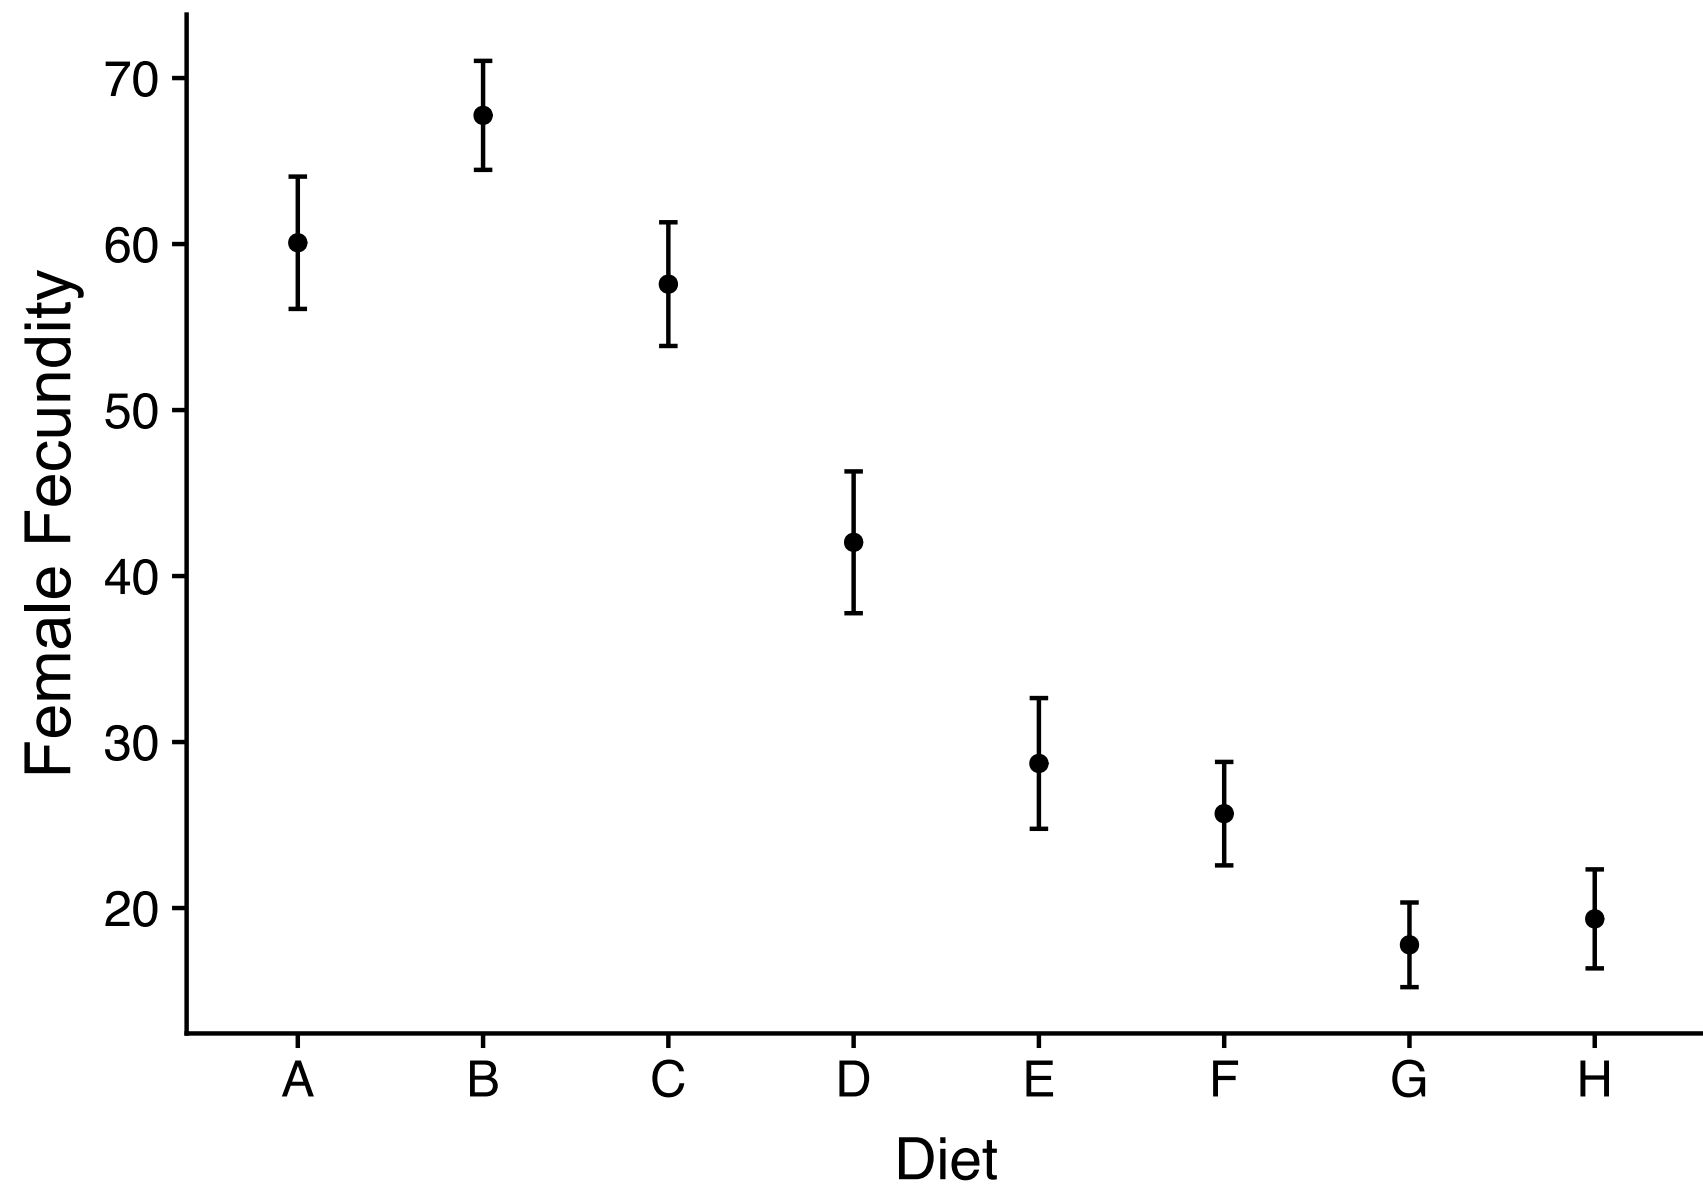

Supplement: supp [file elife-47262-supp-v1.zip]
